# Supplementary material for: Why metal–oxos react with dihydroanthracene and cyclohexadiene at comparable rates, despite having different C–H bond strengths. A computational study
Source: Royal Society of Chemistry journal article supplement (doi:10.1039/c6cc05395e), 2016-01-01
Supplement: c6cc05395e1.pdf [file c6cc05395e1.pdf]

# Why Metal-Oxos React with Dihydroanthracene and Cyclohexadiene at Comparable Rates, Despite Having Different C–H Bond Strengths. A Computational Study

Johannes E. M. N. Klein,<sup>a,\*</sup> Büsra Dereli,<sup>b</sup> Lawrence Que, Jr.,<sup>a</sup> and Christopher J. Cramer<sup>b</sup>

<sup>a</sup> Department of Chemistry and Center for Metals in Biocatalysis, University of Minnesota, 207 Pleasant St. S.E., Minneapolis, Minnesota 55455, United States. E-mail: [kleinj@umn.edu](mailto:kleinj@umn.edu).

<sup>b</sup> Department of Chemistry, Supercomputing Institute, and Chemical Theory Center, University of Minnesota, 207 Pleasant Street SE, Minneapolis, Minnesota 55455, United States.

## Table of Contents

|                                                                                                                |           |
|----------------------------------------------------------------------------------------------------------------|-----------|
| 1. Computational Details                                                                                       | S2-S3     |
| 2. Free Energy Profiles for all HAT Pathways                                                                   | S4-S7     |
| 3. Spin Density Plots of all Open-Shell Complexes                                                              | S8-S11    |
| 4. Experimental Determination of the Second Order Rate Constant for CHD Oxidation by Cu <sup>III</sup> (OH)(L) | S12-S13   |
| 5. Coordinates and Absolute Energies                                                                           | S14-S122  |
| 6. References                                                                                                  | S122-S124 |

## 1. Computational Details

### 1.1 BDE calculations

All density functional theory (DFT) calculations were carried out with the electronic structure code Turbomole v6.6.<sup>1</sup> The M06-2X functional<sup>2</sup> was chosen as benchmark calculations have shown it to be accurate for the computation of bond dissociation energies to within an average error of about 2 kcal mol<sup>-1</sup>.<sup>3</sup> The def2-TZVPP basis set was employed for all atoms.<sup>4</sup> Computations were accelerated using the multipole accelerated resolution of the identity approximation (*MARI-J*)<sup>5</sup> together with the def2-TZVPP/J auxiliary basis set.<sup>6</sup> The grid *m5* was used throughout. Thermal corrections (298.15 K) were obtained from frequency calculations using analytical second derivatives and the harmonic frequencies were scaled by 0.983 as recommended by Truhlar and co-workers for the M06-2X/def2-TZVPP combination of functional and basis set.<sup>7</sup> Frequency calculations were carried out to characterize stationary points giving no imaginary frequency for ground states and a single imaginary frequency for transition states. Small frequencies were raised to 100 cm<sup>-1</sup> in order to compensate for the breakdown of the harmonic oscillator model.<sup>8</sup> For the hydrogen atom we add 5/2\*RT (1.48 kcal mol<sup>-1</sup> at 298.15 K) to the electronic energy as contribution from enthalpy.

Wave function theory (WFT) calculations were carried out with the electronic structure code Molpro Version 2012.1.<sup>9</sup> We computed energies using the *jun-jun* dual method of Truhlar and co-workers,<sup>10</sup> which is based on (R)CCSD(T)-F12a<sup>11</sup> and (R)MP2-F12<sup>12</sup> calculations including explicit correlation in combination with the calendar basis sets *jun-cc-pV(N+d)Z* (N = D,T).<sup>13</sup> The *cc-pVNZ/JKFIT* (N = D,T)<sup>14</sup> (JKFIT and OPTRI) and the *cc-pVNZ* (N = D,T)/MP2FIT<sup>15</sup> auxiliary basis sets were employed. For open-shell molecules, a restricted open-shell Hartree-Fock formalism was used.

The transition state for inversion of the DHA molecules was computed at the M06-2X/def2-TZVPP level of theory (*vide infra*).

### 1.2 HAT calculations

Two individual sets of calculations were carried out: (i) using the B3LYP<sup>16</sup> functional and (ii) using the B3LYP functional in combination with Grimme's D3<sup>17</sup> dispersion correction using the original zero-damping function. The details described below apply to both sets of calculations. Geometries were optimized using the def2-SVP<sup>4</sup> basis set for all atoms except Fe and Cu where the def2-TZVP<sup>4</sup> basis set was used. Single point energies were computed using the def2-TZVPP<sup>4</sup> basis set for all atoms at the located stationary points. Solvation effects of MeCN ( $\epsilon =$

35.88<sup>18</sup> and refraction index = 1.344<sup>19</sup>) and CH<sub>2</sub>Cl<sub>2</sub> ( $\epsilon$  = 8.51<sup>20</sup> and refraction index = 1.421<sup>21</sup>) were modeled using the conductor-like screening model (COSMO)<sup>22</sup> in all calculations. All reported energies include the outlying charge correction.<sup>23</sup> The inclusion of a solvation model aids in the reduction of self-interaction error (SIE) in the HAT calculations for the Fe<sup>IV</sup>(O) complexes as noted by Siegbahn and co-workers.<sup>24</sup>

Frequency calculations were carried out to characterize stationary points giving no imaginary frequency for ground states and a single imaginary frequency for transition states. Small frequencies were raised to 100 cm<sup>-1</sup> in order to compensate for the breakdown of the harmonic oscillator model.<sup>8</sup> Frequency calculations for thermal corrections were carried out using frozen charges (NumForce –cosmo option). Frequencies were used without scaling. Free energies are referenced to a 1 M standard solution state (298.15 K) and include the concentration-change term  $RT\ln(24.5) = 1.89$  kcal mol<sup>-1</sup>.<sup>25</sup>

For the complexes [Fe<sup>IV</sup>(O)TMG<sub>2</sub>dien(MeCN)]<sup>2+</sup> and [Fe<sup>IV</sup>(O)TMG<sub>3</sub>tren]<sup>2+</sup>, as well as the associated reaction paths, the  $S = 2$  spin state, as determined experimentally, was considered. For the HAT reaction by the Cu<sup>III</sup>(OH)(L) complex the reactions studied require transitioning from two closed shell fragments to two open shell fragments resembling a singlet diradical. We use a broken symmetry approach to describe the bond-breaking process. Spin-densities/populations are analyzed to ensure that the correct electronic structure was obtained. The effect of applying a spin purification procedure to remove triplet-state spin contamination was evaluated according to  $E_{singlet} = \frac{2E_{\langle S_z \rangle=0} - \langle S^2 \rangle E_{\langle S_z \rangle=1}}{2 - \langle S^2 \rangle}$ .<sup>26</sup> The  $\Delta\Delta G^\ddagger$  values discussed in the manuscript are only affected by 0.1 kcal/mol. The spin purified values are provided in brackets in Figure S4 (c) and (d) for completeness and are not further discussed.

The start and end points corresponding to the transition states are obtained from dynamic reaction coordinate calculations (DRC –t 150 -f).<sup>27</sup> Start geometries for the [Fe<sup>IV</sup>(O)TMG<sub>2</sub>dien(MeCN)]<sup>2+</sup> complex were constructed from the crystal structure of the [Fe<sup>II</sup>TMG<sub>2</sub>dienCl<sub>2</sub>] complex (CCDC# 845701)<sup>28</sup> and for the [Fe<sup>IV</sup>(O)TMG<sub>3</sub>tren]<sup>2+</sup> complex from the corresponding crystal structure (CCDC# 818436).<sup>29</sup> For the Cu<sup>III</sup>(OH)(L) based reaction paths start geometries were based on a previously reported transition state structure for DHA oxidation.<sup>30</sup>

Structural depictions and spin density plots were generated using IboView.<sup>31</sup>

## 2. Free Energy Profiles for all HAT Pathways

### 2.1 $[\text{Fe}^{\text{IV}}(\text{O})\text{TMG}_2\text{dien}(\text{MeCN})]^{2+}$ ( $\sigma$ ) pathways

#### (a) B3LYP structures for CHD oxidation

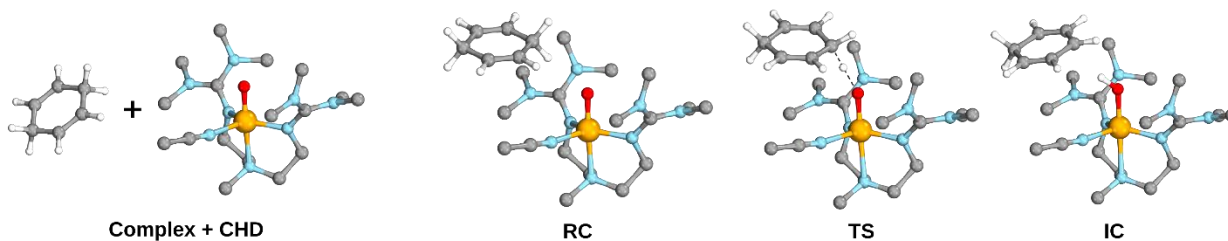

#### (b) B3LYP structures for DHA oxidation

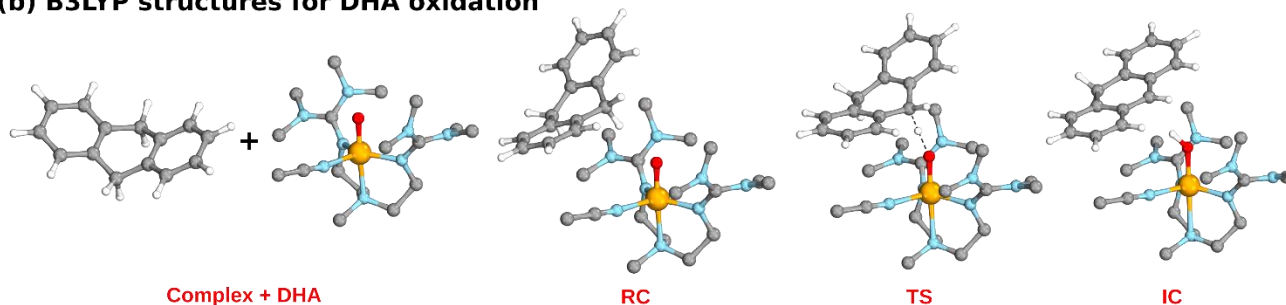

#### (c) B3LYP

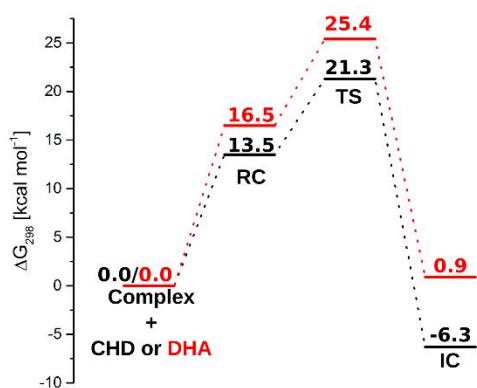

#### (d) B3LYP-D3

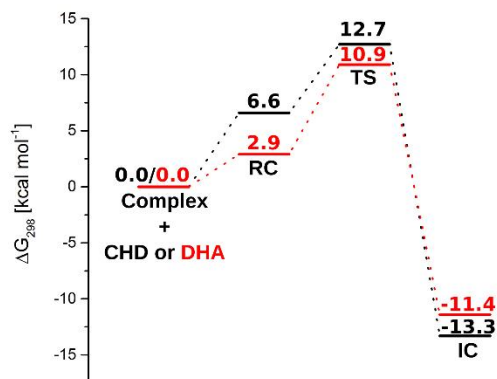

**Figure S1:** B3LYP/def2-SVP(Fe:def2-TZVP)/COSMO( $\epsilon = 35.88$ ) structures for HAT from CHD (a) and DHA (b) by  $[\text{Fe}^{\text{IV}}(\text{O})\text{TMG}_2\text{dien}(\text{MeCN})]^{2+}$  via a ( $\sigma$ ) pathway; Free Energy Profiles (298.15 K) for HAT from CHD and DHA at the B3LYP-def2-TZVPP/B3LYP-def2-SVP(Fe:def2-TZVP) level of theory. COSMO ( $\epsilon = 35.88$ ) was used in all calculations. Data presented in section (c) was computed *without* Grimme's D3 correction and data presented in section (d) *with* the D3 correction.

## 2.2 [Fe<sup>IV</sup>(O)TMG<sub>2</sub>dien(MeCN)]<sup>2+</sup> ( $\pi$ ) pathways

### (a) B3LYP structures for CHD oxidation

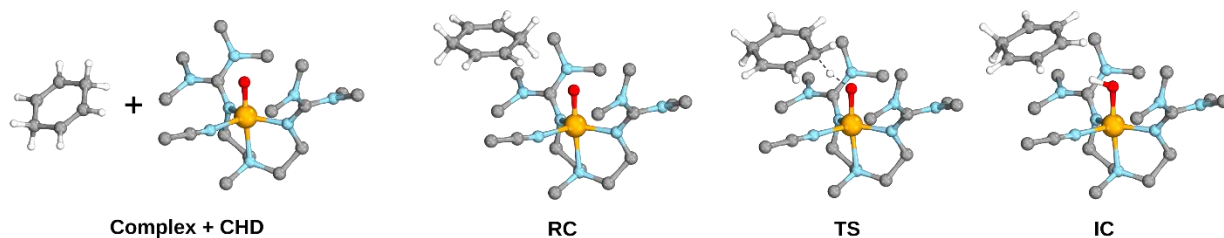

### (b) B3LYP structures for DHA oxidation

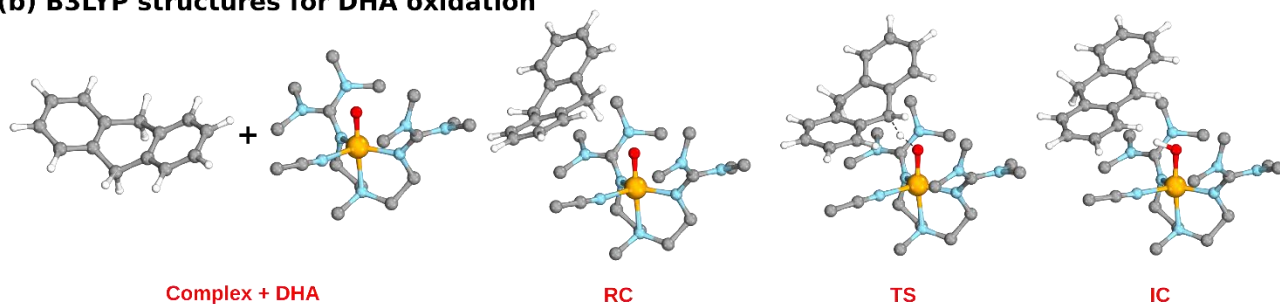

### (c) B3LYP

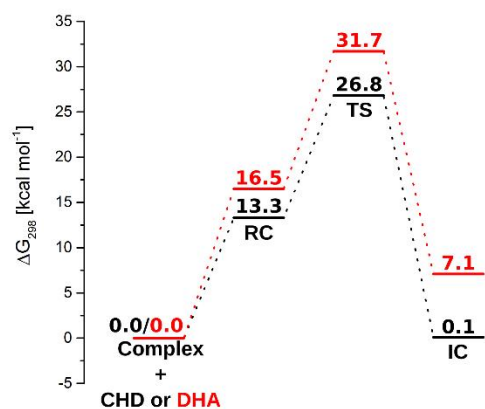

### (d) B3LYP-D3

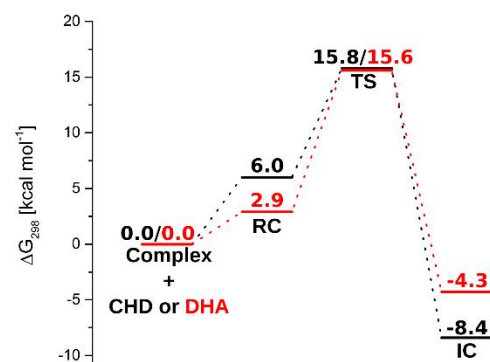

**Figure S2:** B3LYP/def2-SVP(Fe:def2-TZVP)/COSMO( $\epsilon = 35.88$ ) structures for HAT from CHD (a) and DHA (b) by [Fe<sup>IV</sup>(O)TMG<sub>2</sub>dien(MeCN)]<sup>2+</sup> via a ( $\pi$ ) pathway; Free Energy Profiles (298.15 K) for HAT from CHD and DHA at the B3LYP-def2-TZVPP/B3LYP-def2-SVP(Fe:def2-TZVP) level of theory. COSMO ( $\epsilon = 35.88$ ) was used in all calculations. Data presented in section (c) was computed *without* Grimme's D3 correction and data presented in section (d) *with* the D3 correction.

## 2.3 [Fe<sup>IV</sup>(O)TMG<sub>3</sub>tren]<sup>2+</sup> ( $\sigma$ ) pathways

### (a) B3LYP structures for CHD oxidation

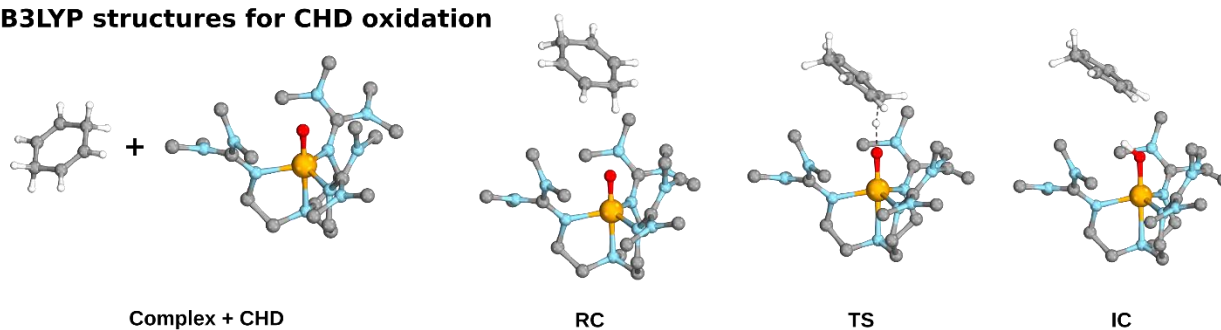

### (b) B3LYP structures for DHA oxidation

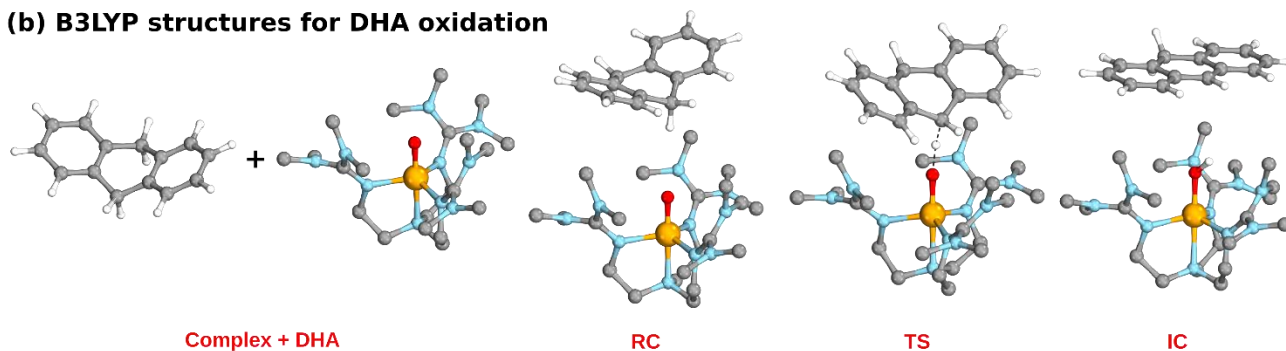

### (c)

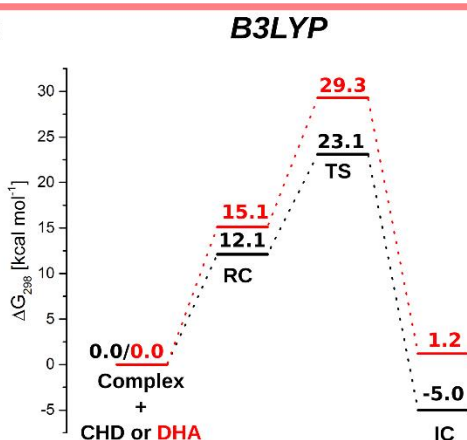

### (d)

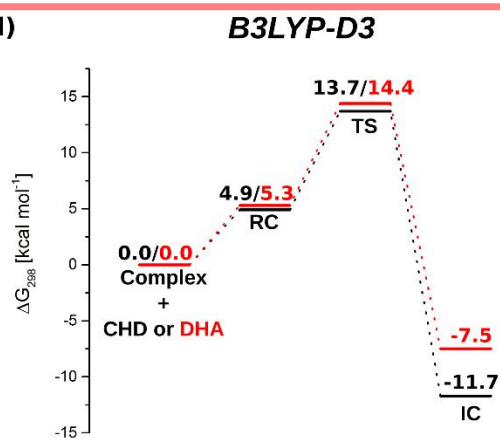

**Figure S3:** B3LYP/def2-SVP(Fe:def2-TZVP)/COSMO( $\epsilon = 35.88$ ) structures for HAT from CHD (a) and DHA (b) by [Fe<sup>IV</sup>(O)TMG<sub>3</sub>tren]<sup>2+</sup> via a ( $\sigma$ ) pathway; Free Energy Profiles (298.15 K) for HAT from CHD and DHA at the B3LYP-def2-TZVP/B3LYP-def2-SVP(Fe:def2-TZVP) level of theory. COSMO ( $\epsilon = 35.88$ ) was used in all calculations. Data presented in section (c) was computed *without* Grimme's D3 correction and data presented in section (d) *with* the D3 correction.

## 2.4 Cu<sup>III</sup>(OH)(L) pathways

### *Cu<sup>III</sup>(OH) pathways*

#### (a) B3LYP structures for CHD oxidation

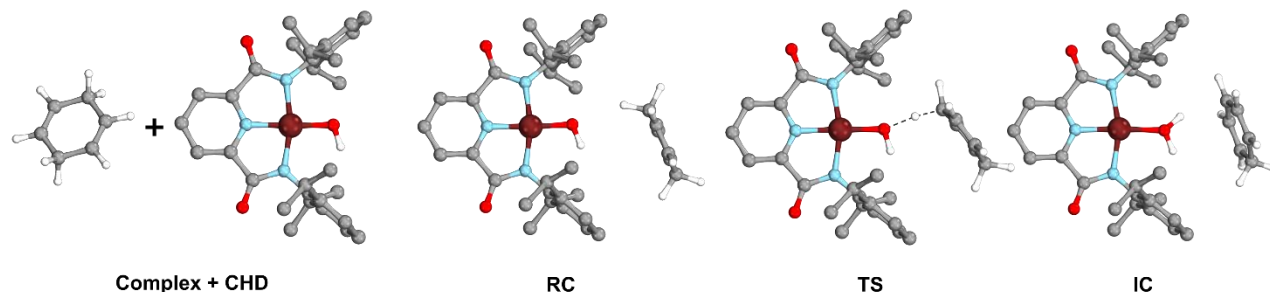

#### (b) B3LYP structures for DHA oxidation

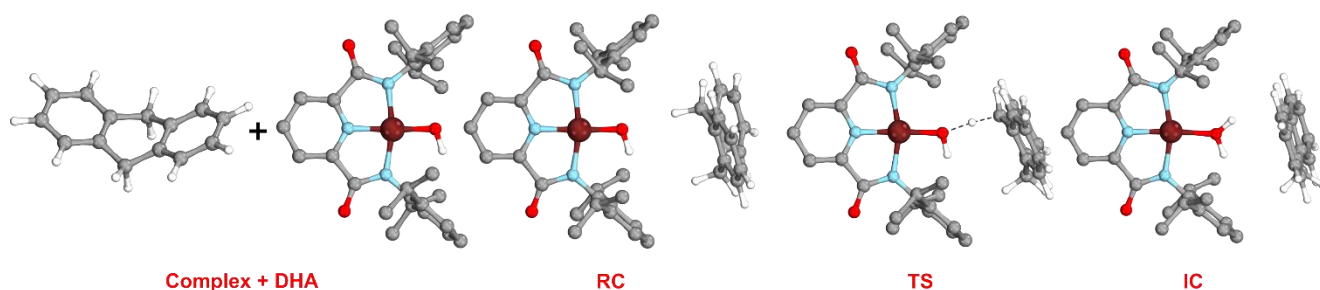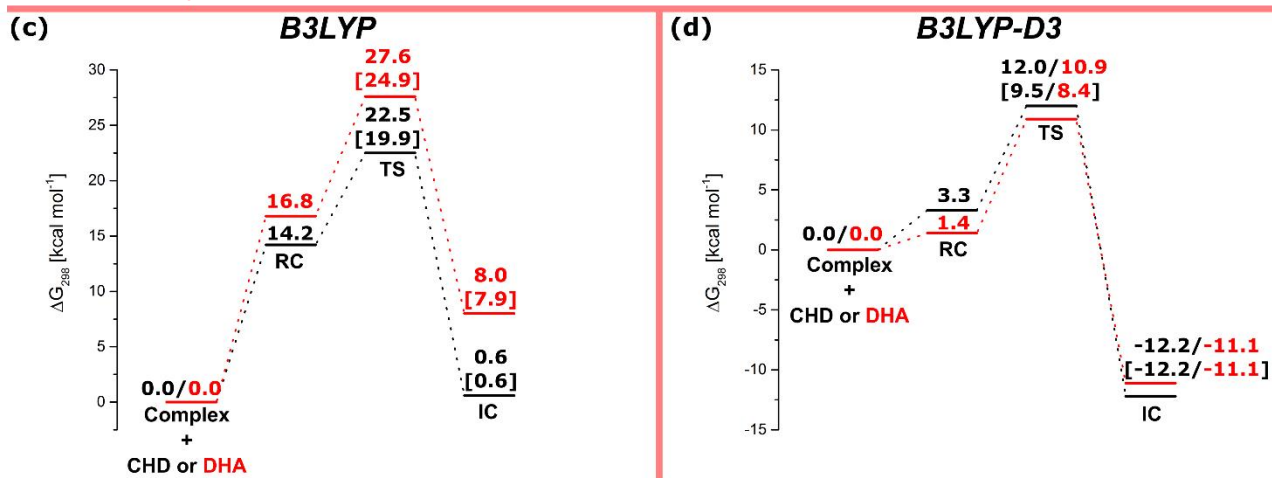

**Figure S4:** B3LYP/def2-SVP(Cu: def2-TZVP)/COSMO( $\epsilon = 8.51$ ) structures for HAT from CHD (a) and DHA (b) by **Cu<sup>III</sup>(OH)(L)**; Free Energy Profiles (298.15 K) for HAT from CHD and DHA at the B3LYP-def2-TZVPP/B3LYP-def2-SVP(Cu: def2-TZVP) level of theory. COSMO ( $\epsilon = 8.51$ ) was used in all calculations. Data presented in section (c) was computed *without* Grimme's D3 correction and data presented in section (d) *with* the D3 correction. Values in brackets are spin purified.

### 3. Spin Density Plots of all Open-Shell Complexes

#### 3.1 $[\text{Fe}^{\text{IV}}(\text{O})\text{TMG}_2\text{dien}(\text{MeCN})]^{2+}$ ( $\sigma$ ) pathways

##### (a) B3LYP structures for CHD oxidation

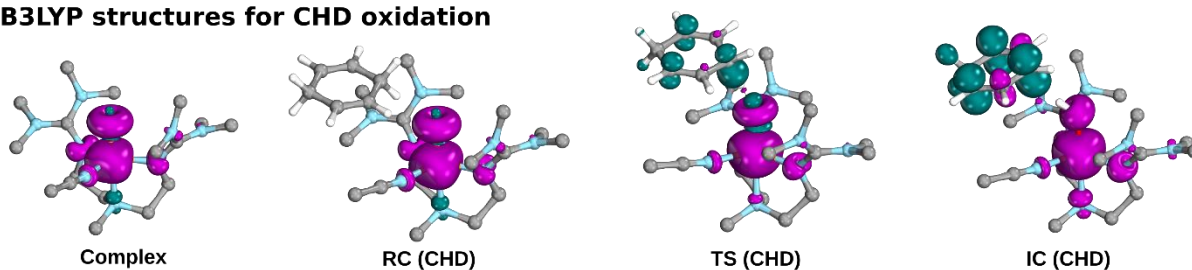

##### (b) B3LYP structures for DHA oxidation

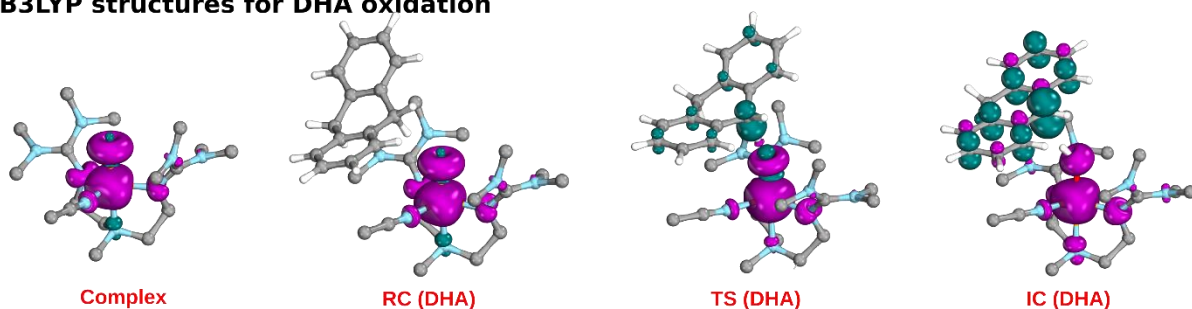

##### (c) B3LYP-D3 structures for CHD oxidation

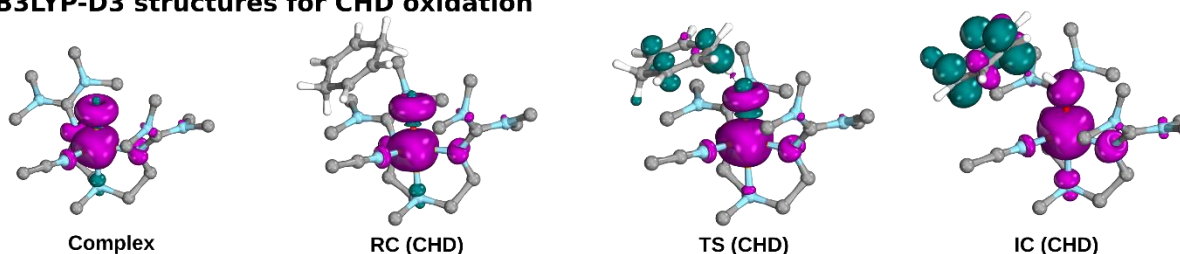

##### (d) B3LYP-D3 structures for DHA oxidation

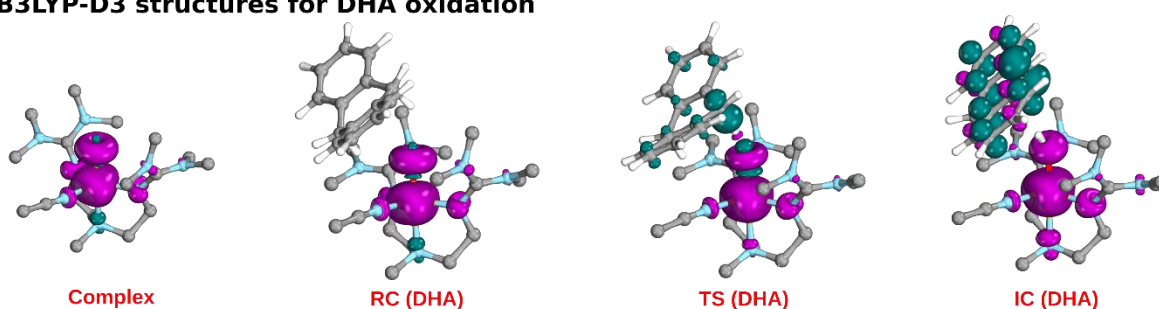

**Figure S5:** Spin density plots for all open shell complexes at the B3LYP/def2-SVP(Fe: def2-TZVP)/COSMO( $\epsilon = 35.88$ ) level of theory for HAT from CHD and DHA by  $[\text{Fe}^{\text{IV}}(\text{O})\text{TMG}_2\text{dien}(\text{MeCN})]^{2+}$  via ( $\sigma$ ) pathways. Data presented in sections (a) and (b) is computed *without* Grimme's D3 correction and in sections (c) and (d) *with* the D3 correction. Positive spin density is depicted in purple and negative spin density in green (isosurface 0.005).



### 3.2 $[\text{Fe}^{\text{IV}}(\text{O})\text{TMG}_2\text{dien}(\text{MeCN})]^{2+}$ ( $\pi$ ) pathways

#### (a) B3LYP structures for CHD oxidation

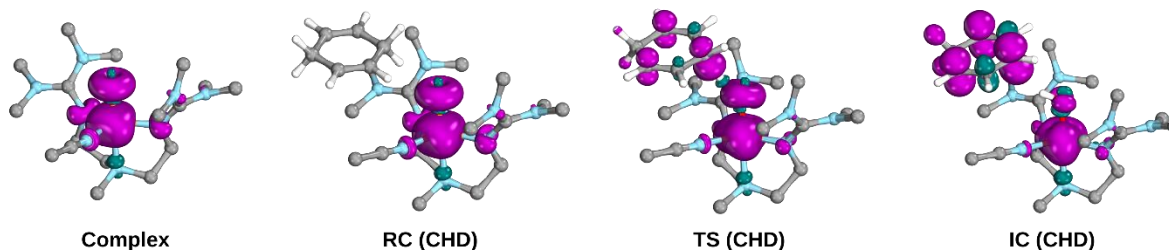

#### (b) B3LYP structures for DHA oxidation

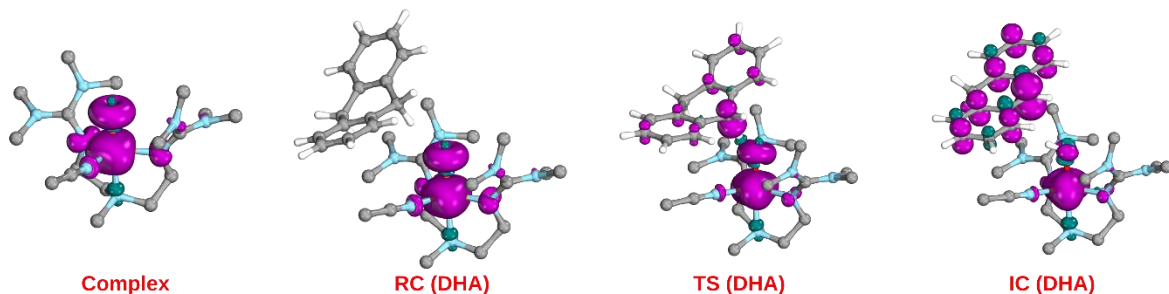

#### (c) B3LYP-D3 structures for CHD oxidation

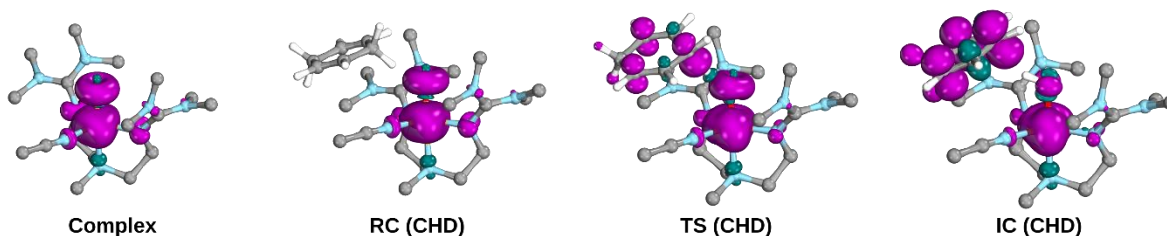

#### (d) B3LYP-D3 structures for DHA oxidation

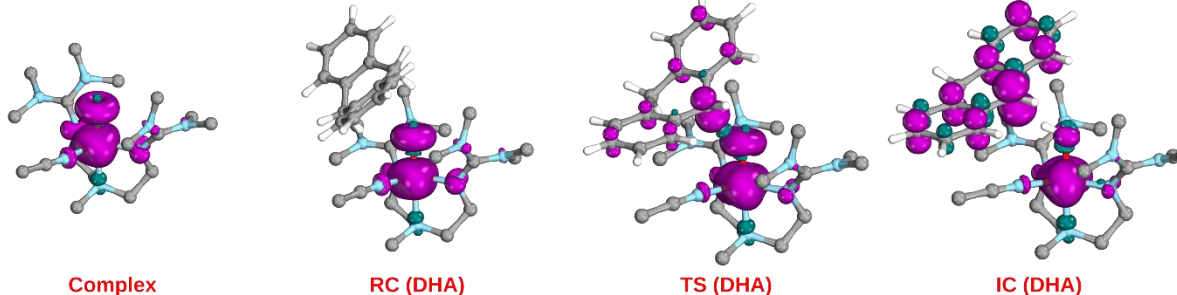

**Figure S6:** Spin density plots for all open shell complexes at the B3LYP/def2-SVP(Fe: def2-TZVP)/COSMO( $\epsilon = 35.88$ ) level of theory for HAT from CHD and DHA by  $[\text{Fe}^{\text{IV}}(\text{O})\text{TMG}_2\text{dien}(\text{MeCN})]^{2+}$  via ( $\pi$ ) pathways. Data presented in sections (a) and (b) is computed *without* Grimme's D3 correction and in sections (c) and (d) *with* the D3 correction. Positive spin density is depicted in purple and negative spin density in green (isosurface 0.005).

### 3.3 $[\text{Fe}^{\text{IV}}(\text{O})\text{TMG}_3\text{tren}]^{2+}$ ( $\sigma$ ) pathways

#### (a) B3LYP structures for CHD oxidation

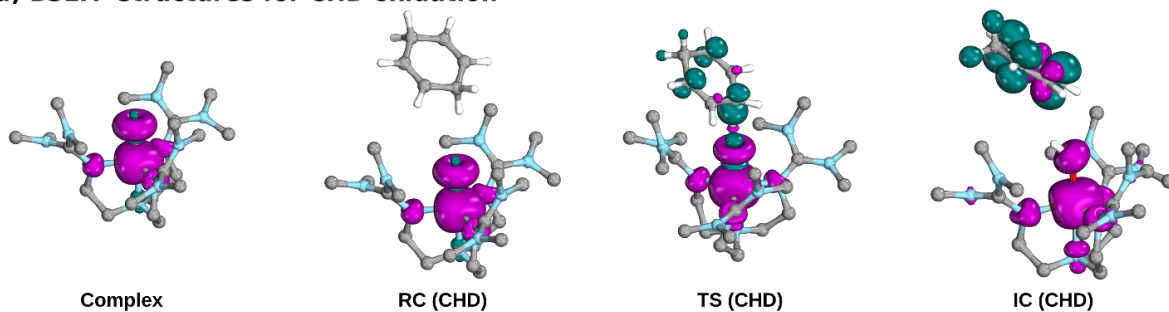

#### (b) B3LYP structures for DHA oxidation

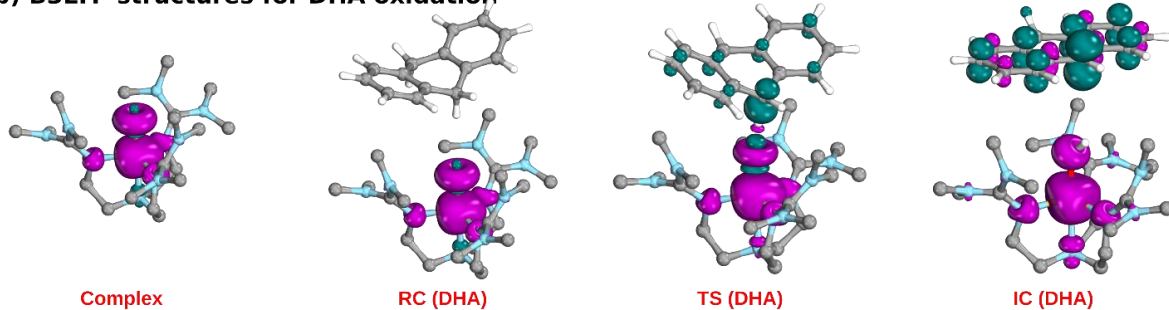

#### (c) B3LYP-D3 structures for CHD oxidation

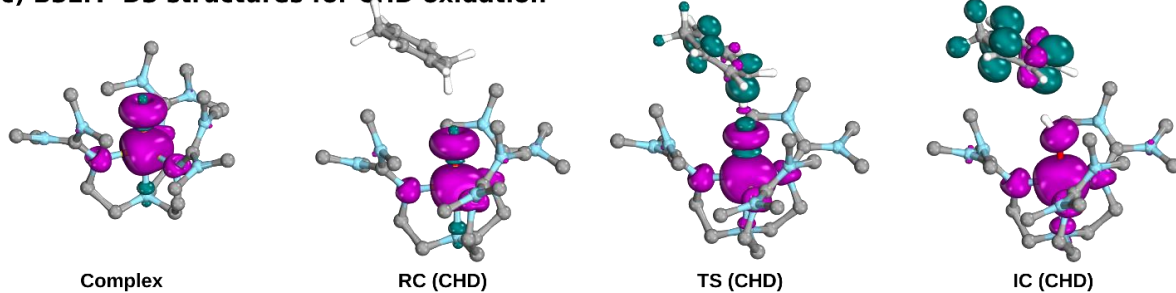

#### (d) B3LYP-D3 structures for DHA oxidation

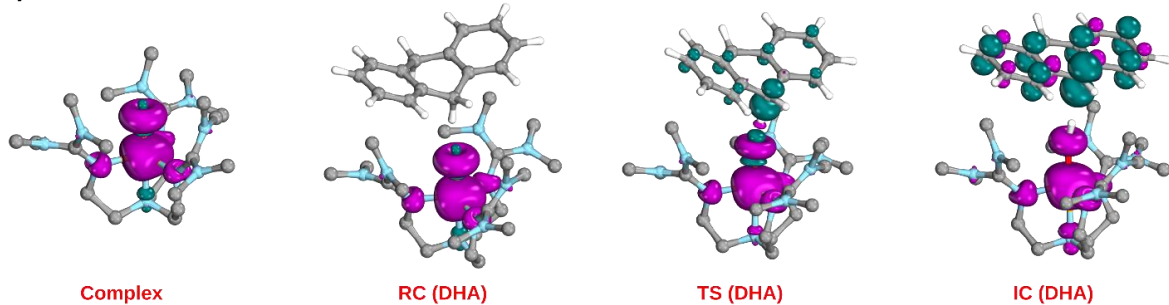

**Figure S7:** Spin density plots for all open shell complexes at the B3LYP/def2-SVP(Fe: def2-TZVP)/COSMO( $\epsilon = 35.88$ ) level of theory for HAT from CHD and DHA by  $[\text{Fe}^{\text{IV}}(\text{O})\text{TMG}_3\text{tren}]^{2+}$  via ( $\sigma$ ) pathways. Data presented in sections (a) and (b) is computed *without* Grimme's D3 correction and in sections (c) and (d) *with* the D3 correction. Positive spin density is depicted in purple and negative spin density in green (isosurface 0.005).

### 3.4 Cu<sup>III</sup>(OH)(L) pathways

---

#### (a) B3LYP structures for CHD oxidation

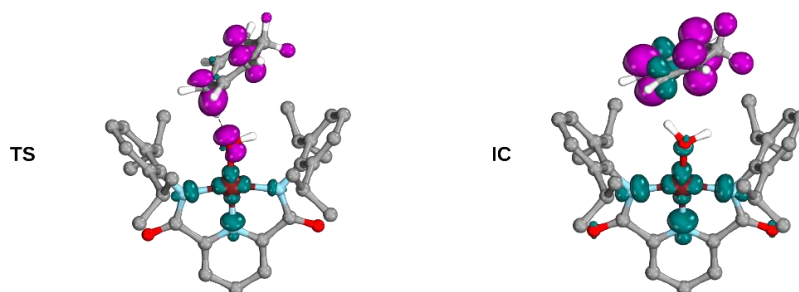

---

#### (b) B3LYP structures for DHA oxidation

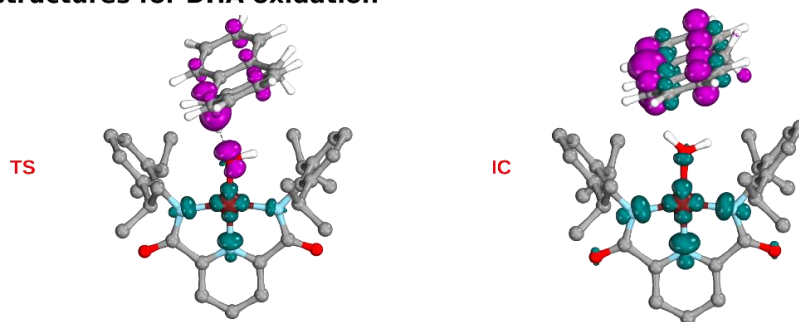

---

#### (c) B3LYP-D3 structures for CHD oxidation

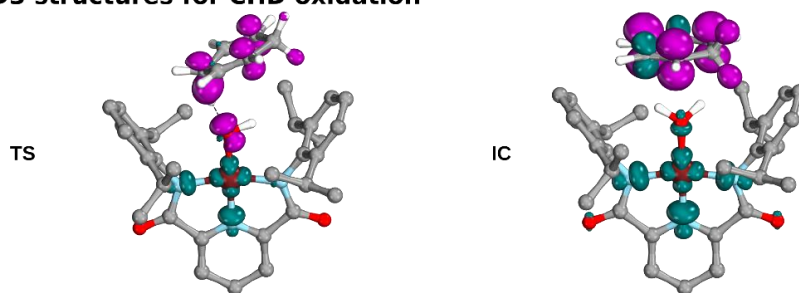

---

#### (d) B3LYP-D3 structures for DHA oxidation

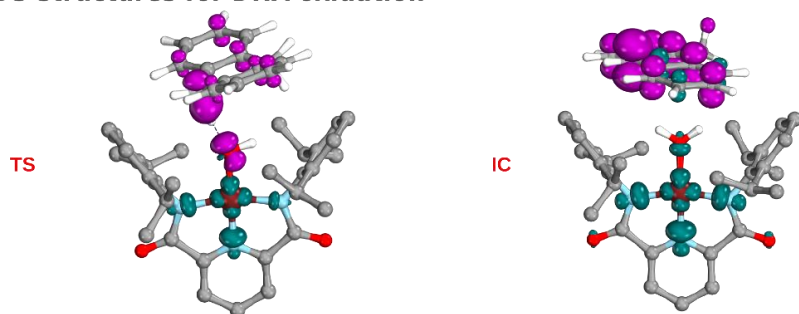

---

**Figure S8:** Spin density plots for all open shell complexes at the B3LYP/def2-SVP(Cu: def2-TZVP)/COSMO( $\epsilon = 8.51$ ) level of theory for HAT from CHD and DHA by **Cu<sup>III</sup>(OH)(L)** via ( $\sigma$ ) pathways. Data presented in sections (a) and (b) is computed *without* Grimme's D3 correction and in sections (c) and (d) *with* the D3 correction. Positive spin density is depicted in purple and negative spin density in green (isosurface 0.005).

#### **4. Experimental Determination of the Second Order Rate Constant for CHD Oxidation by $\text{Cu}^{\text{III}}(\text{OH})(\text{L})$**

The following experiment was carried out by Mr. Debanjan Dhar in the laboratory of Professor William Tolman at the University of Minnesota and kindly provided for the comparison of CHD and DHA rates.

##### **4.1 Materials and Methods**

$[\text{Bu}_4\text{N}][\text{Cu}^{\text{II}}(\text{OH})(\text{L})]$  ( $\text{L} = N,N'$ -bis(2,6-diisopropylphenyl)-2,6-pyridinedicarboxamide)<sup>32</sup> and  $[\text{Fc}][\text{BARF}_4]$ <sup>33</sup> ( $\text{BARF}_4 =$  tetrakis(3,5-bis(trifluoromethyl)phenyl)borate) were synthesized using previously reported procedures. 1,2-Difluorobenzene (DFB) was dried over calcium hydride and vacuum distilled and stored over 3 Å molecular sieves in a nitrogen atmosphere dry box. 1,4-cyclohexadiene (**CHD**) was purchased from Sigma-Aldrich and dried over 3 Å molecular sieves and vacuum distilled. UV-vis spectra were obtained using an HP8453 (190-1100) diode array spectrophotometer. Variable temperature UV-vis experiments were performed using a Unisoku low temperature cell holder.

##### **4.2 General Procedure for Kinetic Studies of Reaction between $\text{Cu}^{\text{III}}(\text{OH})(\text{L})$ and 1,4-Cyclohexadiene in 1,2-Difluorobenzene.**

Under an  $\text{N}_2$  atmosphere, a 3.0 mL cuvette was charged with 1.8 mL of a known concentration of 1,4-cyclohexadiene solution in 1,2-difluorobenzene. The cuvette was cooled at  $-25\text{ }^\circ\text{C}$  for approximately 10 min, after which 0.1 mL of a 2 mM stock solution of  $[\text{Bu}_4\text{N}][\text{Cu}^{\text{II}}(\text{OH})(\text{L})]$  was added. After 2 min, to this was added 0.1 mL (2 mM solution) of  $[\text{Fc}][\text{BARF}_4]$ , which resulted in the immediate growth of an intense charge transfer band at 563 nm, consistent with the formation of the corresponding  **$\text{Cu}^{\text{III}}(\text{OH})(\text{L})$**  species. Decay of this feature was monitored over time by UV-vis spectroscopy. The decay traces were fit to a single exponential decay function to obtain the pseudo-first order rate constants ( $k_{\text{obs}}$ ). Second order rate constants were extracted from linear fits of the plots of  $k_{\text{obs}}$  vs. substrate concentration (**Figure S1**).

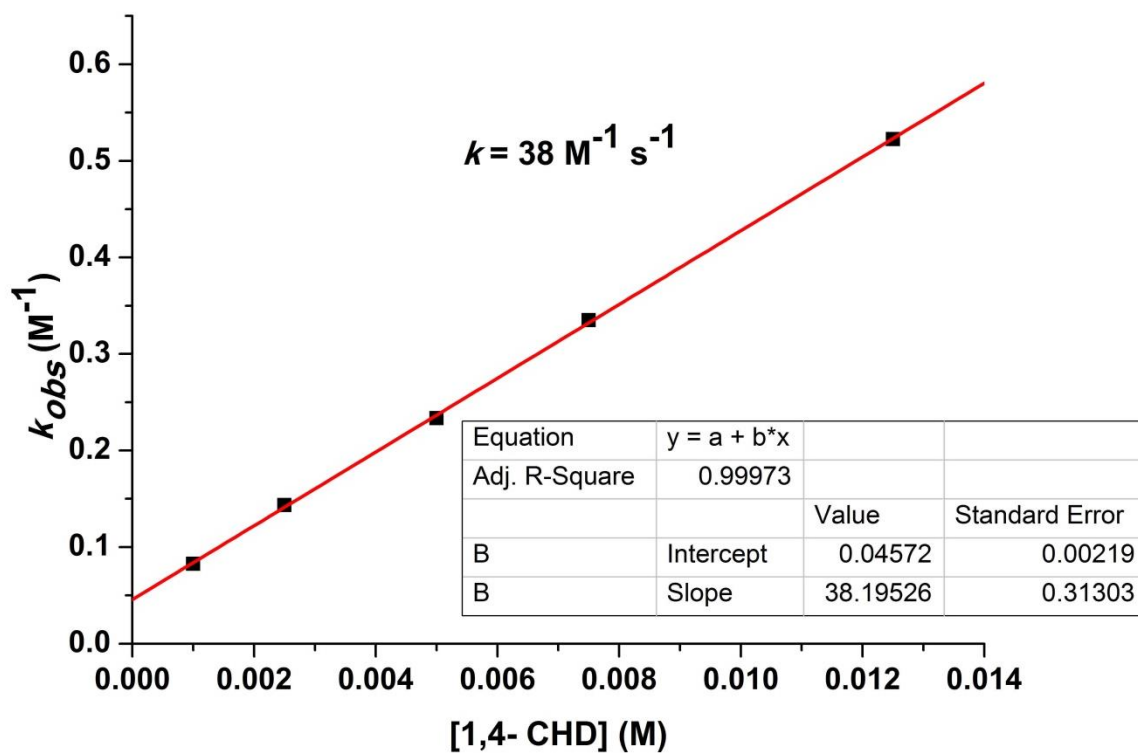

**Figure S1:** Determination of the second order rate constant ( $k_2$ ) for CHD oxidation by the  $\text{Cu}^{\text{III}}(\text{OH})(\text{L})$  complex.

## 5. Coordinates and Absolute Energies

### 5.1 BDE calculations

Method: M06-2X/def2-TZVPP

|                                    |                                                                                                                                                                                                                                                                                                                                       |
|------------------------------------|---------------------------------------------------------------------------------------------------------------------------------------------------------------------------------------------------------------------------------------------------------------------------------------------------------------------------------------|
| C -1.4046313 -0.5729506 0.1865345  | <b>CHD</b><br><b>E<sub>M06-2X/def2-TZVPP</sub>: -233.39460833711</b><br><b>H<sub>(298.15)M06-2X/def2-TZVPP</sub>: 0.127425</b><br><b>E<sub>CCSD(T)-F12a/jun-cc-pV(D+d)Z</sub>: -233.02995965</b><br><b>E<sub>MP2-F12/jun-cc-pV(D+d)Z</sub>: -232.972719624611</b><br><b>E<sub>MP2-F12/jun-cc-pV(T+d)Z</sub>: -232.99822032</b>        |
| C -0.0446240 -1.2043565 0.1867505  |                                                                                                                                                                                                                                                                                                                                       |
| C 1.0638052 -0.1946436 0.1865059   |                                                                                                                                                                                                                                                                                                                                       |
| C 0.8630094 1.1155965 0.1861086    |                                                                                                                                                                                                                                                                                                                                       |
| C -0.4969980 1.7470028 0.1858907   |                                                                                                                                                                                                                                                                                                                                       |
| C -1.6054273 0.7372893 0.1861467   |                                                                                                                                                                                                                                                                                                                                       |
| H -2.2567843 -1.2427789 0.1867285  |                                                                                                                                                                                                                                                                                                                                       |
| H 2.0774017 -0.5787197 0.1866752   |                                                                                                                                                                                                                                                                                                                                       |
| H 1.7151639 1.7854228 0.1859260    |                                                                                                                                                                                                                                                                                                                                       |
| H -2.6190234 1.1213665 0.1859869   |                                                                                                                                                                                                                                                                                                                                       |
| H -0.5983762 2.4074554 -0.6824256  |                                                                                                                                                                                                                                                                                                                                       |
| H -0.5984238 2.4079425 1.0538316   |                                                                                                                                                                                                                                                                                                                                       |
| H 0.0567513 -1.8648160 1.0550623   |                                                                                                                                                                                                                                                                                                                                       |
| H 0.0568049 -1.8652921 -0.6811931  |                                                                                                                                                                                                                                                                                                                                       |
| C -1.3784230 -0.5639650 0.3227757  | <b>[CHD-H]</b><br><b>E<sub>M06-2X/def2-TZVPP</sub>: -232.76493438380</b><br><b>H<sub>(298.15)M06-2X/def2-TZVPP</sub>: 0.113821</b><br><b>E<sub>RCCSD(T)-F12a/jun-cc-pV(D+d)Z</sub>: -232.39751727</b><br><b>E<sub>RMP2-F12/jun-cc-pV(D+d)Z</sub>: -232.344995096648</b><br><b>E<sub>RMP2-F12/jun-cc-pV(T+d)Z</sub>: -232.37029696</b> |
| C -0.0633745 -1.0822313 0.3816832  |                                                                                                                                                                                                                                                                                                                                       |
| C 1.0360570 -0.1940061 0.3222447   |                                                                                                                                                                                                                                                                                                                                       |
| C 0.8582968 1.1447504 0.2092943    |                                                                                                                                                                                                                                                                                                                                       |
| C -0.4997089 1.7648306 0.1394156   |                                                                                                                                                                                                                                                                                                                                       |
| C -1.6096878 0.7665559 0.2096595   |                                                                                                                                                                                                                                                                                                                                       |
| H -2.2163005 -1.2477576 0.3693563  |                                                                                                                                                                                                                                                                                                                                       |
| H 2.0402414 -0.5956586 0.3684931   |                                                                                                                                                                                                                                                                                                                                       |
| H 1.7151504 1.8044955 0.1663086    |                                                                                                                                                                                                                                                                                                                                       |
| H -2.6247330 1.1396699 0.1666116   |                                                                                                                                                                                                                                                                                                                                       |
| H -0.5917245 2.3630932 -0.7796361  |                                                                                                                                                                                                                                                                                                                                       |
| H -0.6137877 2.5096723 0.9413216   |                                                                                                                                                                                                                                                                                                                                       |
| H 0.0998373 -2.1456388 0.4721938   |                                                                                                                                                                                                                                                                                                                                       |
| C -3.5144132 -0.7611460 0.1517152  | <b>DHA</b><br><b>E<sub>M06-2X/def2-TZVPP</sub>: -540.69848526566</b><br><b>H<sub>(298.15)M06-2X/def2-TZVPP</sub>: 0.226125</b><br><b>E<sub>RCCSD(T)-F12a/jun-cc-pV(D+d)Z</sub>: -539.83966492</b><br><b>E<sub>RMP2-F12/jun-cc-pV(D+d)Z</sub>: -539.755379227706</b><br><b>E<sub>RMP2-F12/jun-cc-pV(T+d)Z</sub>: -539.80757449</b>     |
| C -3.5212029 0.6001798 0.4187428   |                                                                                                                                                                                                                                                                                                                                       |
| C -2.3641503 -1.3615706 -0.3406861 |                                                                                                                                                                                                                                                                                                                                       |
| C -2.3777651 1.3532346 0.1916290   |                                                                                                                                                                                                                                                                                                                                       |
| C -1.2196695 -0.6109534 -0.5762761 |                                                                                                                                                                                                                                                                                                                                       |
| C -1.2265792 0.7583302 -0.3080083  |                                                                                                                                                                                                                                                                                                                                       |
| C 0.0448665 -1.2270745 -1.1196741  |                                                                                                                                                                                                                                                                                                                                       |
| C 0.0306146 1.5462042 -0.5776116   |                                                                                                                                                                                                                                                                                                                                       |
| C 1.2656009 0.7552321 -0.2266439   |                                                                                                                                                                                                                                                                                                                                       |
| C 1.2727226 -0.6140972 -0.4947006  |                                                                                                                                                                                                                                                                                                                                       |
| C 2.3833431 1.3472914 0.3469441    |                                                                                                                                                                                                                                                                                                                                       |
| C 2.3976503 -1.3675203 -0.1853477  |                                                                                                                                                                                                                                                                                                                                       |
| C 3.5078741 0.5914708 0.6474642    |                                                                                                                                                                                                                                                                                                                                       |
| C 3.5151780 -0.7698266 0.3804091   |                                                                                                                                                                                                                                                                                                                                       |
| H -4.3993234 -1.3556102 0.3337349  |                                                                                                                                                                                                                                                                                                                                       |
| H -4.4114880 1.0733890 0.8100464   |                                                                                                                                                                                                                                                                                                                                       |

|   |            |            |            |                                                        |
|---|------------|------------|------------|--------------------------------------------------------|
| H | -2.3526379 | -2.4259380 | -0.5411878 |                                                        |
| H | -2.3769647 | 2.4144880  | 0.4083343  |                                                        |
| H | 2.3708700  | 2.4084210  | 0.5638793  |                                                        |
| H | 2.3964233  | -2.4319273 | -0.3859711 |                                                        |
| H | 4.3721133  | 1.0625332  | 1.0955572  |                                                        |
| H | 4.3851218  | -1.3663582 | 0.6190811  |                                                        |
| H | 0.0658117  | 1.7941054  | -1.6457525 |                                                        |
| H | 0.0141446  | 2.4932599  | -0.0387467 |                                                        |
| H | 0.0388176  | -2.3072320 | -0.9757588 |                                                        |
| H | 0.0804982  | -1.0551186 | -2.2025836 |                                                        |
| C | -3.6689997 | -0.7121762 | 0.0220328  | <b>[DHA-H]'</b>                                        |
| C | -3.6916643 | 0.6795956  | -0.0535844 | <b>EM06-2X/def2-TZVPP: -540.06346911401</b>            |
| C | -2.4637987 | -1.3751681 | 0.0977193  | <b>H<sub>(298.15)</sub>M06-2X/def2-TZVPP: 0.212865</b> |
| C | -2.4985507 | 1.3879125  | -0.0471438 | <b>ERCCSD(T)-F12a/jun-cc-pV(D+d)Z: -539.20079730</b>   |
| C | -1.2439434 | -0.6697467 | 0.1015060  | <b>ERMP2-F12/jun-cc-pV(D+d)Z: -539.117140429630</b>    |
| C | -1.2751223 | 0.7394629  | 0.0320984  | <b>ERMP2-F12/jun-cc-pV(T+d)Z: -539.17021225</b>        |
| C | -0.0000196 | -1.3541940 | 0.1590610  |                                                        |
| C | -0.0000127 | 1.5401553  | 0.0680441  |                                                        |
| C | 1.2750933  | 0.7394569  | 0.0320723  |                                                        |
| C | 1.2439046  | -0.6697516 | 0.1015280  |                                                        |
| C | 2.4985187  | 1.3879001  | -0.0472495 |                                                        |
| C | 2.4637645  | -1.3751711 | 0.0978011  |                                                        |
| C | 3.6916318  | 0.6795806  | -0.0536640 |                                                        |
| C | 3.6689653  | -0.7121853 | 0.0220723  |                                                        |
| H | -4.5952324 | -1.2704868 | 0.0187659  |                                                        |
| H | -4.6338210 | 1.2062145  | -0.1168555 |                                                        |
| H | -2.4380294 | -2.4563028 | 0.1520493  |                                                        |
| H | -2.5170961 | 2.4701042  | -0.1034300 |                                                        |
| H | 2.5170727  | 2.4700880  | -0.1035992 |                                                        |
| H | 2.4379953  | -2.4563029 | 0.1521886  |                                                        |
| H | 4.6337844  | 1.2062005  | -0.1169874 |                                                        |
| H | 4.5951939  | -1.2705029 | 0.0188392  |                                                        |
| H | -0.0000226 | 2.2557265  | -0.7595464 |                                                        |
| H | 0.0000002  | 2.1530098  | 0.9770107  |                                                        |
| H | -0.0000236 | -2.4350306 | 0.2170268  |                                                        |
| H | 0          | 0          | 0          | <b>H'</b>                                              |
|   |            |            |            | <b>EM06-2X/def2-TZVPP: -0.49814085117</b>              |
|   |            |            |            | <b>ERCCSD(T)-F12a/jun-cc-pV(D+d)Z: -0.49933813</b>     |
|   |            |            |            | <b>ERMP2-F12/jun-cc-pV(D+d)Z: -0.49933813</b>          |
|   |            |            |            | <b>ERMP2-F12/jun-cc-pV(T+d)Z: -0.49982654</b>          |
| C | -0.6957042 | -3.4845769 | -1.2346887 | <b>DHA-TS Inversion</b>                                |
| C | 0.6956950  | -3.4844783 | -1.2349703 | <b>EM06-2X/def2-TZVPP: -540.69579592466</b>            |
| C | -1.3751504 | -2.3507977 | -0.8330785 | <b>H<sub>(298.15)</sub>M06-2X/def2-TZVPP: 0.225142</b> |
| C | 1.3751432  | -2.3506025 | -0.8336358 |                                                        |
| C | -0.6948823 | -1.2011816 | -0.4259712 |                                                        |

|   |            |            |            |
|---|------------|------------|------------|
| C | 0.6948772  | -1.2010831 | -0.4262524 |
| C | -1.4965466 | 0.0000647  | 0.0000670  |
| C | 1.4965440  | 0.0002760  | -0.0005364 |
| C | 0.6948794  | 1.2014484  | 0.4257096  |
| C | -0.6948798 | 1.2013498  | 0.4259910  |
| C | 1.3751475  | 2.3508821  | 0.8333321  |
| C | -1.3751462 | 2.3506861  | 0.8338899  |
| C | 0.6957014  | 3.4844451  | 1.2355513  |
| C | -0.6956985 | 3.4843462  | 1.2358332  |
| H | -1.2420536 | -4.3645289 | -1.5458240 |
| H | 1.2420432  | -4.3643530 | -1.5463261 |
| H | -2.4589758 | -2.3447080 | -0.8306766 |
| H | 2.4589685  | -2.3443587 | -0.8316754 |
| H | 2.4589728  | 2.3447809  | 0.8309648  |
| H | -2.4589715 | 2.3444299  | 0.8319644  |
| H | 1.2420522  | 4.3642057  | 1.5472250  |
| H | -1.2420484 | 4.3640291  | 1.5477278  |
| H | 2.1595528  | -0.2906322 | 0.8197555  |
| H | 2.1591274  | 0.2912926  | -0.8211352 |
| H | -2.1594986 | 0.2909890  | -0.8202666 |
| H | -2.1591867 | -0.2909360 | 0.8206239  |

## 5.2 HAT Calculations

### 5.2.1 $[\text{Fe}^{\text{IV}}(\text{O})\text{TMG}_3\text{tren}]^{2+}$ ( $\sigma$ ), $[\text{Fe}^{\text{IV}}(\text{O})\text{TMG}_2\text{dien}(\text{MeCN})]^{2+}$ ( $\sigma$ ) and $[\text{Fe}^{\text{IV}}(\text{O})\text{TMG}_2\text{dien}(\text{MeCN})]^{2+}$ ( $\pi$ ) pathways (B3LYP)

Method: B3LYP/def2-SVP(Fe:def2-TZVP)/COSMO( $\epsilon = 35.88$ )

|   |            |            |            |                                                                                                                                                                                                                                                                                                                                                                                                                                                                                                             |
|---|------------|------------|------------|-------------------------------------------------------------------------------------------------------------------------------------------------------------------------------------------------------------------------------------------------------------------------------------------------------------------------------------------------------------------------------------------------------------------------------------------------------------------------------------------------------------|
| C | -1.4111774 | -0.5812849 | 0.1866830  | <p style="text-align: center;"><b>CHD</b></p> <p><math>E_{\text{B3LYP/def2-SVP/COSMO}(\epsilon = 35.88)}</math>:</p> <p><b>-233.0953243759</b></p> <p><math>E_{\text{B3LYP/def2-TZVPP/COSMO}(\epsilon = 35.88)}</math>:</p> <p><b>-233.3536128246</b></p> <p><math>ZPE_{\text{B3LYP/def2-SVP/COSMO}(\epsilon = 35.88)}</math>:</p> <p><b>0.121841</b></p> <p><b>Chem. Pot.<sub>(298.15)/B3LYP/def2-SVP/COSMO(<math>\epsilon = 35.88</math>)</sub>:</b></p> <p><b>0.094824 (<math>\sigma = 4</math>)</b></p> |
| C | -0.0432947 | -1.2131073 | 0.1865797  |                                                                                                                                                                                                                                                                                                                                                                                                                                                                                                             |
| C | 1.0725677  | -0.2006139 | 0.1866134  |                                                                                                                                                                                                                                                                                                                                                                                                                                                                                                             |
| C | 0.8695532  | 1.1239299  | 0.1862949  |                                                                                                                                                                                                                                                                                                                                                                                                                                                                                                             |
| C | -0.4983290 | 1.7557522  | 0.1857224  |                                                                                                                                                                                                                                                                                                                                                                                                                                                                                                             |
| C | -1.6141918 | 0.7432590  | 0.1862907  |                                                                                                                                                                                                                                                                                                                                                                                                                                                                                                             |
| H | -2.2712989 | -1.2609750 | 0.1870781  |                                                                                                                                                                                                                                                                                                                                                                                                                                                                                                             |
| H | 2.0967717  | -0.5915000 | 0.1869724  |                                                                                                                                                                                                                                                                                                                                                                                                                                                                                                             |
| H | 1.7296741  | 1.8036205  | 0.1864022  |                                                                                                                                                                                                                                                                                                                                                                                                                                                                                                             |
| H | -2.6383963 | 1.1341445  | 0.1864131  |                                                                                                                                                                                                                                                                                                                                                                                                                                                                                                             |
| H | -0.6019741 | 2.4319211  | -0.6872346 | <p style="text-align: center;"><b>DHA</b></p> <p><math>E_{\text{B3LYP/def2-SVP/COSMO}(\epsilon = 35.88)}</math>:</p> <p><b>-540.0051075707</b></p>                                                                                                                                                                                                                                                                                                                                                          |
| H | -0.6021373 | 2.4331810  | 1.0576689  |                                                                                                                                                                                                                                                                                                                                                                                                                                                                                                             |
| H | 0.0604589  | -1.8899700 | 1.0589738  |                                                                                                                                                                                                                                                                                                                                                                                                                                                                                                             |
| H | 0.0604231  | -1.8898398 | -0.6859302 |                                                                                                                                                                                                                                                                                                                                                                                                                                                                                                             |
| C | -3.5649727 | -0.7620845 | 0.1227423  |                                                                                                                                                                                                                                                                                                                                                                                                                                                                                                             |
| C | -3.5720534 | 0.6113158  | 0.3916265  |                                                                                                                                                                                                                                                                                                                                                                                                                                                                                                             |
| C | -2.3968395 | -1.3720988 | -0.3475023 |                                                                                                                                                                                                                                                                                                                                                                                                                                                                                                             |
| C | -2.4109285 | 1.3651834  | 0.1885262  |                                                                                                                                                                                                                                                                                                                                                                                                                                                                                                             |
| C | -1.2318292 | -0.6211688 | -0.5609990 |                                                                                                                                                                                                                                                                                                                                                                                                                                                                                                             |



|   |            |            |            |
|---|------------|------------|------------|
| C | -1.2389242 | 0.7618287  | -0.2901190 |
| C | 0.0437069  | -1.2497055 | -1.0849793 |
| C | 0.0292922  | 1.5542064  | -0.5358478 |
| C | 1.2768616  | 0.7587001  | -0.2081356 |
| C | 1.2839046  | -0.6243290 | -0.4788309 |
| C | 2.4167616  | 1.3592284  | 0.3456654  |
| C | 2.4306561  | -1.3781417 | -0.1899994 |
| C | 3.5604072  | 0.6025407  | 0.6236470  |
| C | 3.5673290  | -0.7709208 | 0.3550016  |
| H | -4.4661176 | -1.3599638 | 0.2854140  |
| H | -4.4788239 | 1.0947386  | 0.7658700  |
| H | -2.3880985 | -2.4475928 | -0.5503538 |
| H | -2.4133122 | 2.4377919  | 0.4063001  |
| H | 2.4075452  | 2.4318207  | 0.5633344  |
| H | 2.4324083  | -2.4536755 | -0.3928329 |
| H | 4.4422596  | 1.0838161  | 1.0557318  |
| H | 4.4545330  | -1.3709848 | 0.5758681  |
| H | 0.0645761  | 1.8375480  | -1.6078281 |
| H | 0.0122184  | 2.5015903  | 0.0244303  |
| H | 0.0370663  | -2.3385688 | -0.9235728 |
| H | 0.0798299  | -1.1073076 | -2.1845682 |

**E**<sub>B3LYP/def2-TZVPP/COSMO(ε = 35.88)</sub>:

**-540.5866247568**

**ZPE**<sub>B3LYP/def2-SVP/COSMO(ε = 35.88)</sub>:

**0.217265**

**Chem. Pot.**<sub>(298.15)/B3LYP/def2-SVP/COSMO(ε = 35.88)</sub>:

**0.182819 (σ = 2)**

### [Fe<sup>IV</sup>(O)TMG<sub>2</sub>dien(MeCN)]<sup>2+</sup> (σ) pathway

|    |           |            |           |
|----|-----------|------------|-----------|
| Fe | 4.7688866 | 9.4501776  | 3.1777595 |
| N  | 4.4657054 | 11.2878440 | 2.1549817 |
| O  | 3.1678937 | 9.2340564  | 3.3921057 |
| N  | 5.1825649 | 9.8456151  | 5.0580689 |
| C  | 6.5890691 | 10.2129841 | 5.2979430 |
| H  | 6.8828455 | 9.9712978  | 6.3320619 |
| H  | 6.7774794 | 11.2907749 | 5.1582496 |
| C  | 7.4309487 | 9.4063913  | 4.3252658 |
| H  | 8.4971760 | 9.6820799  | 4.3854691 |
| H  | 7.3439721 | 8.3376971  | 4.5662835 |
| N  | 6.9239606 | 9.6226059  | 2.9371512 |
| C  | 7.3325779 | 8.5225702  | 2.0160764 |
| H  | 8.3959591 | 8.2715029  | 2.1696578 |
| H  | 7.2165095 | 8.8951927  | 0.9886868 |
| C  | 6.4380037 | 7.3145986  | 2.2172876 |
| H  | 6.6326620 | 6.5749289  | 1.4248715 |
| H  | 6.6702578 | 6.8204783  | 3.1755880 |
| N  | 5.0450921 | 7.7885302  | 2.1608544 |
| C  | 4.2853222 | 10.0102776 | 6.0614847 |
| N  | 4.3239068 | 11.1098739 | 6.8557527 |
| C  | 4.7336982 | 12.4162661 | 6.3486244 |
| H  | 4.7412909 | 12.4131775 | 5.2523414 |
| H  | 5.7293395 | 12.7071244 | 6.7227621 |

**[Fe<sup>IV</sup>(O)TMG<sub>2</sub>dien(MeCN)]<sup>2+</sup>**

**E**<sub>B3LYP/def2-SVP(Fe: def2-TZVP)/COSMO(ε = 35.88)</sub>:

**-2445.7011101624 (<S<sup>2</sup>> 6.05271312)**

**E**<sub>B3LYP/def2-TZVPP/COSMO(ε = 35.88)</sub>:

**-2447.0153464804 (<S<sup>2</sup>> 6.05510794)**

**ZPE**<sub>B3LYP/def2-SVP(Fe: def2-TZVP)/COSMO(ε = 35.88)</sub>:

**0.572743**

**Chem. Pot.**<sub>(298.15)/B3LYP/def2-SVP(Fe: def2-TZVP)/COSMO(ε = 35.88)</sub>:

**0.514953**

|    |            |            |            |                                                                                                |
|----|------------|------------|------------|------------------------------------------------------------------------------------------------|
| H  | 4.0064646  | 13.1715858 | 6.6865287  |                                                                                                |
| C  | 3.9789286  | 11.0732137 | 8.2766865  |                                                                                                |
| H  | 3.9378121  | 10.0367438 | 8.6311348  |                                                                                                |
| H  | 3.0154594  | 11.5677517 | 8.4816718  |                                                                                                |
| H  | 4.7638517  | 11.6023252 | 8.8399915  |                                                                                                |
| N  | 3.3563392  | 9.0637555  | 6.3064065  |                                                                                                |
| C  | 2.0127476  | 9.3862676  | 6.7829070  |                                                                                                |
| H  | 1.8351268  | 10.4661125 | 6.7270110  |                                                                                                |
| H  | 1.8494797  | 9.0417491  | 7.8168824  |                                                                                                |
| H  | 1.2821483  | 8.8818095  | 6.1308104  |                                                                                                |
| C  | 3.5765358  | 7.6550197  | 5.9979898  |                                                                                                |
| H  | 4.6414372  | 7.4723917  | 5.8149155  |                                                                                                |
| H  | 2.9953725  | 7.3502467  | 5.1142463  |                                                                                                |
| H  | 3.2553477  | 7.0494527  | 6.8605649  |                                                                                                |
| C  | 7.4292424  | 10.9138974 | 2.4112479  |                                                                                                |
| H  | 8.5299242  | 10.8838057 | 2.3456780  |                                                                                                |
| H  | 7.1388580  | 11.7409151 | 3.0704542  |                                                                                                |
| H  | 7.0171678  | 11.0960044 | 1.4119301  |                                                                                                |
| C  | 4.0834601  | 6.9697067  | 1.6824469  |                                                                                                |
| N  | 4.1471943  | 5.6230428  | 1.8569546  |                                                                                                |
| C  | 4.6874751  | 5.0170077  | 3.0703655  |                                                                                                |
| H  | 4.7808364  | 5.7665677  | 3.8639639  |                                                                                                |
| H  | 5.6700607  | 4.5487644  | 2.8946239  |                                                                                                |
| H  | 3.9921287  | 4.2356121  | 3.4163571  |                                                                                                |
| C  | 3.6944682  | 4.6765401  | 0.8379478  |                                                                                                |
| H  | 3.5384115  | 5.1917556  | -0.1170177 |                                                                                                |
| H  | 2.7633166  | 4.1652515  | 1.1325614  |                                                                                                |
| H  | 4.4760242  | 3.9128722  | 0.6971182  |                                                                                                |
| N  | 3.0459695  | 7.4781720  | 0.9823055  |                                                                                                |
| C  | 1.7041787  | 6.9032841  | 1.0463718  |                                                                                                |
| H  | 1.6429025  | 6.1594677  | 1.8487681  |                                                                                                |
| H  | 1.4121671  | 6.4348119  | 0.0923431  |                                                                                                |
| H  | 0.9881586  | 7.7106479  | 1.2680628  |                                                                                                |
| C  | 3.1493896  | 8.7080732  | 0.2054660  |                                                                                                |
| H  | 4.2016040  | 8.9745772  | 0.0559017  |                                                                                                |
| H  | 2.6302674  | 9.5396602  | 0.7063742  |                                                                                                |
| H  | 2.6806227  | 8.5453183  | -0.7782137 |                                                                                                |
| C  | 4.1404823  | 12.2782990 | 1.6555319  |                                                                                                |
| C  | 3.7344875  | 13.5189803 | 1.0272112  |                                                                                                |
| H  | 4.0389012  | 13.5112539 | -0.0306102 |                                                                                                |
| H  | 2.6411143  | 13.6252235 | 1.0948004  |                                                                                                |
| H  | 4.2180567  | 14.3653572 | 1.5385425  |                                                                                                |
| Fe | 0.5428691  | 0.7317008  | 0.4951827  | <b>[Fe<sup>IV</sup>(O)TMG<sub>2</sub>dien(MeCN)]<sup>2+</sup>-CHD-RC (<math>\sigma</math>)</b> |
| N  | -0.3792568 | -0.4090049 | 2.0295750  | <b>E<sub>B3LYP/def2-SVP(Fe:def2-TZVP)/COSMO(<math>\epsilon</math> = 35.88):</sub></b>          |
| O  | -0.4805130 | 0.1545360  | -0.6341141 | <b>-2678.7947971799 (&lt;S<sup>2</sup>&gt; 6.05338439)</b>                                     |
| N  | 2.1286857  | -0.2440784 | -0.1366422 |                                                                                                |
| C  | 3.3140524  | -0.0795066 | 0.7227011  |                                                                                                |

|   |            |            |            |
|---|------------|------------|------------|
| H | 4.2387384  | -0.2289907 | 0.1424330  |
| H | 3.3408044  | -0.8033869 | 1.5546201  |
| C | 3.2746535  | 1.3379649  | 1.2663394  |
| H | 4.0921359  | 1.5203807  | 1.9839165  |
| H | 3.3877973  | 2.0499345  | 0.4368873  |
| N | 1.9545068  | 1.5785264  | 1.9221369  |
| C | 1.6328590  | 3.0320899  | 2.0150576  |
| H | 2.5161888  | 3.5975412  | 2.3578190  |
| H | 0.8431414  | 3.1453034  | 2.7710157  |
| C | 1.1271688  | 3.5421515  | 0.6792848  |
| H | 0.7356718  | 4.5645190  | 0.7991845  |
| H | 1.9556554  | 3.6035024  | -0.0462018 |
| N | 0.0663529  | 2.6240114  | 0.2323354  |
| C | 2.1578716  | -1.1773266 | -1.1187360 |
| N | 2.7142910  | -2.3972263 | -0.9052092 |
| C | 2.6533885  | -3.0572922 | 0.3957186  |
| H | 1.9137837  | -2.5649486 | 1.0379883  |
| H | 3.6335381  | -3.0593379 | 0.9008118  |
| H | 2.3427033  | -4.1041299 | 0.2491391  |
| C | 3.4404264  | -3.1295370 | -1.9428519 |
| H | 3.6647323  | -2.4685468 | -2.7880421 |
| H | 2.8764933  | -4.0050762 | -2.3040122 |
| H | 4.3922849  | -3.4853879 | -1.5178347 |
| N | 1.6577183  | -0.8968630 | -2.3393964 |
| C | 1.0030943  | -1.9045912 | -3.1705822 |
| H | 0.8183352  | -2.8164412 | -2.5914341 |
| H | 1.5995307  | -2.1546833 | -4.0627150 |
| H | 0.0330492  | -1.5034618 | -3.5040878 |
| C | 1.6171255  | 0.4599171  | -2.8740420 |
| H | 2.2719294  | 1.1142854  | -2.2877255 |
| H | 0.5909572  | 0.8578820  | -2.8580849 |
| H | 1.9746774  | 0.4405637  | -3.9159204 |
| C | 1.9541512  | 0.9900555  | 3.2833171  |
| H | 2.7126685  | 1.4930202  | 3.9065997  |
| H | 2.1871338  | -0.0808908 | 3.2423391  |
| H | 0.9689282  | 1.1209353  | 3.7457944  |
| C | -0.9559153 | 3.1003268  | -0.5094836 |
| N | -0.7830350 | 4.1309749  | -1.3791971 |
| C | 0.4446082  | 4.3065879  | -2.1496269 |
| H | 1.0529029  | 3.3961086  | -2.1138112 |
| H | 1.0422530  | 5.1579877  | -1.7842136 |
| H | 0.1786785  | 4.5003737  | -3.2010713 |
| C | -1.8073309 | 5.1511498  | -1.6011953 |
| H | -2.5795908 | 5.0896488  | -0.8255704 |
| H | -2.2787795 | 5.0550381  | -2.5930689 |
| H | -1.3325424 | 6.1435510  | -1.5412423 |
| N | -2.1948063 | 2.5778266  | -0.3730169 |
| C | -3.1197396 | 2.4596444  | -1.4976244 |

**E**<sub>B3LYP/def2-TZVPP/COSMO( $\epsilon = 35.88$ ):</sub>

**-2680.3651942219 (<S<sup>2</sup>> 6.05578902)**

**ZPE**<sub>B3LYP/def2-SVP(Fe:def2-TZVP)/COSMO( $\epsilon = 35.88$ ):</sub>

**0.695695**

**Chem. Pot.**<sub>(298.15)/B3LYP/def2-SVP(Fe:def2-</sub>

**TZVP)/COSMO( $\epsilon = 35.88$ ):**

**0.630469**

|    |            |            |            |                                                                                                |
|----|------------|------------|------------|------------------------------------------------------------------------------------------------|
| H  | -2.6103914 | 2.6894816  | -2.4401858 |                                                                                                |
| H  | -3.9919728 | 3.1236802  | -1.3832002 |                                                                                                |
| H  | -3.4809325 | 1.4198828  | -1.5464153 |                                                                                                |
| C  | -2.6591004 | 1.9717780  | 0.8689852  |                                                                                                |
| H  | -2.0051241 | 2.2602255  | 1.6995647  |                                                                                                |
| H  | -2.6831589 | 0.8737734  | 0.7908116  |                                                                                                |
| H  | -3.6791276 | 2.3311958  | 1.0786453  |                                                                                                |
| C  | -0.9565606 | -1.1148437 | 2.7399073  |                                                                                                |
| C  | -1.6849162 | -2.0014613 | 3.6240474  |                                                                                                |
| H  | -2.2090886 | -1.4087569 | 4.3893369  |                                                                                                |
| H  | -2.4187652 | -2.5753296 | 3.0357896  |                                                                                                |
| H  | -0.9823928 | -2.6913132 | 4.1161752  |                                                                                                |
| C  | -2.2987780 | -5.1073081 | -0.5961310 |                                                                                                |
| C  | -3.1334050 | -5.2573805 | 0.6492129  |                                                                                                |
| C  | -3.8673117 | -3.9950744 | 1.0212199  |                                                                                                |
| C  | -3.7770872 | -2.8537734 | 0.3223513  |                                                                                                |
| C  | -2.9326591 | -2.6995721 | -0.9158943 |                                                                                                |
| C  | -2.2122460 | -3.9673423 | -1.2948519 |                                                                                                |
| H  | -1.7444057 | -5.9916102 | -0.9308970 |                                                                                                |
| H  | -4.5103751 | -4.0375362 | 1.9080990  |                                                                                                |
| H  | -4.3472757 | -1.9757692 | 0.6482225  |                                                                                                |
| H  | -1.5903710 | -3.9336808 | -2.1968783 |                                                                                                |
| H  | -2.2028082 | -1.8756588 | -0.7794907 |                                                                                                |
| H  | -3.5654866 | -2.3578584 | -1.7601284 |                                                                                                |
| H  | -3.8561095 | -6.0886724 | 0.5222040  |                                                                                                |
| H  | -2.4968681 | -5.5886604 | 1.4946425  |                                                                                                |
| Fe | 4.4308526  | 9.2851410  | 3.1850415  | <b>[Fe<sup>IV</sup>(O)TMG<sub>2</sub>dien(MeCN)]<sup>2+</sup>-CHD-TS (<math>\sigma</math>)</b> |
| N  | 3.9038494  | 11.0430674 | 2.0864176  | <b>E<sub>B3LYP/def2-SVP(Fe:def2-TZVP)/COSMO(<math>\epsilon</math> = 35.88):</sub></b>          |
| O  | 2.8132939  | 8.8720609  | 3.4892696  | <b>-2678.7771659493 (&lt;S<sup>2</sup>&gt; 6.47328013)</b>                                     |
| N  | 5.0156793  | 9.8042179  | 5.0408055  | <b>E<sub>B3LYP/def2-TZVPP/COSMO(<math>\epsilon</math> = 35.88):</sub></b>                      |
| C  | 6.2803709  | 10.5573319 | 5.0665483  | <b>-2680.3463477638 (&lt;S<sup>2</sup>&gt; 6.46761236)</b>                                     |
| H  | 6.7077853  | 10.5652375 | 6.0821020  | <b>ZPE<sub>B3LYP/def2-SVP(Fe:def2-TZVP)/COSMO(<math>\epsilon</math> = 35.88):</sub></b>        |
| H  | 6.1461025  | 11.6123994 | 4.7714585  | <b>0.689157</b>                                                                                |
| C  | 7.2493288  | 9.8764146  | 4.1126595  | <b>Chem. Pot.<sub>(298.15)/B3LYP/def2-SVP(Fe:def2-</sub></b>                                   |
| H  | 8.2218060  | 10.4000430 | 4.0970340  | <b>TZVP)/COSMO(<math>\epsilon</math> = 35.88):</b>                                             |
| H  | 7.4314720  | 8.8504446  | 4.4620007  | <b>0.624082</b>                                                                                |
| N  | 6.6672803  | 9.8243897  | 2.7470834  |                                                                                                |
| C  | 7.1833062  | 8.6798311  | 1.9594374  |                                                                                                |
| H  | 8.2805347  | 8.5944529  | 2.0644033  |                                                                                                |
| H  | 6.9649204  | 8.8797621  | 0.9002114  |                                                                                                |
| C  | 6.4989073  | 7.3848552  | 2.3689885  |                                                                                                |
| H  | 6.8228705  | 6.5791056  | 1.6918643  |                                                                                                |
| H  | 6.8169840  | 7.0890151  | 3.3836387  |                                                                                                |
| N  | 5.0448931  | 7.5856131  | 2.2875061  |                                                                                                |
| C  | 4.2821049  | 9.7441535  | 6.1686478  |                                                                                                |
| N  | 4.2008548  | 10.8052411 | 7.0194577  |                                                                                                |
| C  | 4.1908596  | 12.1805333 | 6.5322318  |                                                                                                |

|   |            |            |            |
|---|------------|------------|------------|
| H | 3.9917096  | 12.2003448 | 5.4540298  |
| H | 5.1431152  | 12.6990517 | 6.7349408  |
| H | 3.3860508  | 12.7337792 | 7.0428540  |
| C | 4.1610916  | 10.6545565 | 8.4728034  |
| H | 4.4213294  | 9.6279513  | 8.7562515  |
| H | 3.1723227  | 10.9070589 | 8.8905645  |
| H | 4.9051964  | 11.3344913 | 8.9184690  |
| N | 3.6336194  | 8.6056126  | 6.5024109  |
| C | 2.3725261  | 8.6032109  | 7.2383643  |
| H | 1.9489040  | 9.6129732  | 7.2769703  |
| H | 2.4949320  | 8.2201128  | 8.2646976  |
| H | 1.6607166  | 7.9483009  | 6.7120427  |
| C | 4.0691947  | 7.2980398  | 6.0297095  |
| H | 5.1183879  | 7.3441123  | 5.7159737  |
| H | 3.4492706  | 6.9590317  | 5.1847545  |
| H | 3.9765857  | 6.5724019  | 6.8530534  |
| C | 6.9315340  | 11.0881505 | 2.0321098  |
| H | 8.0164862  | 11.2208418 | 1.8695388  |
| H | 6.5607808  | 11.9430392 | 2.6124635  |
| H | 6.4267438  | 11.0814789 | 1.0576651  |
| C | 4.2707049  | 6.5910660  | 1.8218772  |
| N | 4.5860505  | 5.2794061  | 2.0152361  |
| C | 5.2341324  | 4.8004529  | 3.2313217  |
| H | 5.2067885  | 5.5707247  | 4.0087940  |
| H | 6.2819200  | 4.5072510  | 3.0518024  |
| H | 4.6898172  | 3.9171328  | 3.6028983  |
| C | 4.3277239  | 4.2530856  | 1.0068692  |
| H | 4.0727488  | 4.7175579  | 0.0471850  |
| H | 3.5146309  | 3.5715860  | 1.3076904  |
| H | 5.2430189  | 3.6546050  | 0.8702108  |
| N | 3.1576606  | 6.8735821  | 1.1018658  |
| C | 1.9468458  | 6.0628435  | 1.1866080  |
| H | 2.0277952  | 5.3351468  | 2.0021620  |
| H | 1.7406660  | 5.5295880  | 0.2438978  |
| H | 1.0908112  | 6.7234790  | 1.3994873  |
| C | 3.0402336  | 8.0778148  | 0.2898541  |
| H | 4.0316682  | 8.5070718  | 0.1042842  |
| H | 2.4067649  | 8.8341113  | 0.7788109  |
| H | 2.5839856  | 7.8117797  | -0.6770967 |
| C | 3.4568590  | 11.9695012 | 1.5592788  |
| C | 2.8921522  | 13.1288706 | 0.8991307  |
| H | 3.2440820  | 13.1686764 | -0.1430309 |
| H | 1.7937327  | 13.0575980 | 0.9111174  |
| H | 3.2062396  | 14.0430992 | 1.4255775  |
| C | -0.6574007 | 11.0568062 | 4.9238442  |
| C | -0.7497750 | 12.0650310 | 3.8165097  |
| C | -0.4672174 | 11.4920718 | 2.4584639  |
| C | -0.0545598 | 10.2212477 | 2.2732216  |

|   |            |            |           |
|---|------------|------------|-----------|
| C | 0.1932010  | 9.2915236  | 3.4000411 |
| C | -0.2492947 | 9.7871810  | 4.7229678 |
| H | -0.9602755 | 11.3817258 | 5.9248239 |
| H | -0.6371324 | 12.1427281 | 1.5936478 |
| H | 0.1162464  | 9.8509516  | 1.2569806 |
| H | -0.2234809 | 9.0868234  | 5.5631681 |
| H | 1.3938658  | 9.1086716  | 3.4634510 |
| H | -0.1220484 | 8.2538476  | 3.1923562 |
| H | -1.7497681 | 12.5442795 | 3.8237375 |
| H | -0.0633882 | 12.9149626 | 4.0202543 |

|    |            |            |            |
|----|------------|------------|------------|
| Fe | 0.2946972  | 0.5358629  | 0.4576258  |
| N  | -0.5586012 | -0.4551866 | 2.1462471  |
| O  | -0.9330809 | -0.1875874 | -0.6815360 |
| N  | 1.9922772  | -0.4153338 | -0.0916437 |
| C  | 3.1068106  | -0.3020920 | 0.8621215  |
| H  | 4.0640131  | -0.5438237 | 0.3726425  |
| H  | 3.0016339  | -0.9982611 | 1.7119079  |
| C  | 3.1477999  | 1.1290737  | 1.3766939  |
| H  | 3.9733782  | 1.2609839  | 2.0989377  |
| H  | 3.3387619  | 1.8049404  | 0.5314912  |
| N  | 1.8503006  | 1.4901820  | 1.9986911  |
| C  | 1.5807509  | 2.9444916  | 1.9304135  |
| H  | 2.4653890  | 3.5244996  | 2.2532615  |
| H  | 0.7649734  | 3.1636853  | 2.6351039  |
| C  | 1.1510238  | 3.3622536  | 0.5303706  |
| H  | 0.8513292  | 4.4217956  | 0.5520491  |
| H  | 2.0033485  | 3.2923404  | -0.1670241 |
| N  | 0.0306722  | 2.5091166  | 0.1121066  |
| C  | 2.0896427  | -1.3077974 | -1.0972425 |
| N  | 2.6898682  | -2.5172349 | -0.9226641 |
| C  | 2.6062326  | -3.2444102 | 0.3397758  |
| H  | 1.8117738  | -2.8255433 | 0.9691600  |
| H  | 3.5584247  | -3.2212572 | 0.8956255  |
| H  | 2.3611613  | -4.2979067 | 0.1285362  |
| C  | 3.4839694  | -3.1635192 | -1.9665313 |
| H  | 3.6989600  | -2.4543503 | -2.7744314 |
| H  | 2.9779904  | -4.0489847 | -2.3859940 |
| H  | 4.4409022  | -3.4909878 | -1.5293182 |
| N  | 1.6046660  | -1.0064724 | -2.3236972 |
| C  | 1.0071642  | -2.0104669 | -3.1998021 |
| H  | 0.8584304  | -2.9517629 | -2.6584678 |
| H  | 1.6244294  | -2.1992591 | -4.0931678 |
| H  | 0.0228879  | -1.6437053 | -3.5321469 |
| C  | 1.4889264  | 0.3668539  | -2.7982151 |
| H  | 2.1355993  | 1.0239629  | -2.2052746 |
| H  | 0.4466331  | 0.7181196  | -2.7352880 |
| H  | 1.8120542  | 0.4087275  | -3.8504045 |

**$[Fe^{IV}(O)TMG_2dien(MeCN)]^{2+}$ -CHD-IC ( $\sigma$ )**

**E**<sub>B3LYP/def2-SVP(Fe:def2-TZVP)/COSMO( $\epsilon$  = 35.88):</sub>

**-2678.8195904194 (<S<sup>2</sup>> 7.03662745)**

**E**<sub>B3LYP/def2-TZVPP/COSMO( $\epsilon$  = 35.88):</sub>

**-2680.3907041148 (<S<sup>2</sup>> 7.03398300)**

**ZPE**<sub>B3LYP/def2-SVP(Fe:def2-TZVP)/COSMO( $\epsilon$  = 35.88):</sub>

**0.691013**

**Chem. Pot.**<sub>(298.15)/B3LYP/def2-SVP(Fe:def2-</sub>

**TZVP)/COSMO( $\epsilon$  = 35.88):**

**0.624496**

|                                                                                                                        |            |            |            |
|------------------------------------------------------------------------------------------------------------------------|------------|------------|------------|
| C                                                                                                                      | 1.8056154  | 1.0309555  | 3.3987201  |
| H                                                                                                                      | 2.5660943  | 1.5550548  | 4.0060494  |
| H                                                                                                                      | 2.0015801  | -0.0480450 | 3.4560187  |
| H                                                                                                                      | 0.8152986  | 1.2299171  | 3.8283776  |
| C                                                                                                                      | -0.9795159 | 3.0506997  | -0.5947618 |
| N                                                                                                                      | -0.7739218 | 4.0555816  | -1.4896434 |
| C                                                                                                                      | 0.4457879  | 4.1579008  | -2.2842867 |
| H                                                                                                                      | 1.0127016  | 3.2223033  | -2.2363940 |
| H                                                                                                                      | 1.0890215  | 4.9873551  | -1.9466723 |
| H                                                                                                                      | 0.1725088  | 4.3412835  | -3.3358611 |
| C                                                                                                                      | -1.7484207 | 5.1229653  | -1.7101494 |
| H                                                                                                                      | -2.5055130 | 5.1163810  | -0.9173959 |
| H                                                                                                                      | -2.2470645 | 5.0329827  | -2.6894717 |
| H                                                                                                                      | -1.2225868 | 6.0908720  | -1.6809006 |
| N                                                                                                                      | -2.2503549 | 2.6189098  | -0.4074335 |
| C                                                                                                                      | -3.2057911 | 2.5078357  | -1.5056649 |
| H                                                                                                                      | -2.7122434 | 2.6967022  | -2.4657071 |
| H                                                                                                                      | -4.0506414 | 3.2061297  | -1.3877131 |
| H                                                                                                                      | -3.6052796 | 1.4806027  | -1.5215332 |
| C                                                                                                                      | -2.7180826 | 2.0887542  | 0.8667417  |
| H                                                                                                                      | -2.0186061 | 2.3532716  | 1.6682490  |
| H                                                                                                                      | -2.8296523 | 0.9938243  | 0.8257276  |
| H                                                                                                                      | -3.7014037 | 2.5298015  | 1.0967939  |
| C                                                                                                                      | -1.0805846 | -1.0647719 | 2.9786351  |
| C                                                                                                                      | -1.7348395 | -1.8300839 | 4.0189662  |
| H                                                                                                                      | -2.4140623 | -1.1747519 | 4.5856423  |
| H                                                                                                                      | -2.3121799 | -2.6480399 | 3.5608948  |
| H                                                                                                                      | -0.9788728 | -2.2507627 | 4.6995272  |
| C                                                                                                                      | -1.9003835 | -4.4416560 | -0.9916887 |
| C                                                                                                                      | -2.2481093 | -4.9497718 | 0.3770538  |
| C                                                                                                                      | -3.2314727 | -4.0849853 | 1.1115343  |
| C                                                                                                                      | -3.7405443 | -2.9359143 | 0.5640368  |
| C                                                                                                                      | -3.3608248 | -2.5053992 | -0.7409305 |
| C                                                                                                                      | -2.4427084 | -3.2877508 | -1.4982154 |
| H                                                                                                                      | -1.2034521 | -5.0330493 | -1.5936173 |
| H                                                                                                                      | -3.5529433 | -4.4113369 | 2.1057792  |
| H                                                                                                                      | -4.4647509 | -2.3414617 | 1.1297914  |
| H                                                                                                                      | -2.1739834 | -2.9624050 | -2.5077767 |
| H                                                                                                                      | -1.4732821 | -0.9907046 | -0.6072284 |
| H                                                                                                                      | -3.8094260 | -1.6089843 | -1.1755799 |
| H                                                                                                                      | -2.6351772 | -5.9911902 | 0.3085843  |
| H                                                                                                                      | -1.3243686 | -5.0833788 | 0.9842471  |
| Fe                                                                                                                     | 1.7468852  | 0.4623730  | 0.2216486  |
| N                                                                                                                      | 0.7442064  | 2.0637573  | -0.7479917 |
| O                                                                                                                      | 0.5933707  | -0.6065980 | -0.2061384 |
| N                                                                                                                      | 1.3165638  | 0.4765539  | 2.1386781  |
| C                                                                                                                      | 2.0900990  | 1.4586550  | 2.9187750  |
| <b><math>[\text{Fe}^{\text{IV}}(\text{O})\text{TMG}_2\text{dien}(\text{MeCN})]^{2+}\text{-DHA-RC } (\sigma)</math></b> |            |            |            |
| <b>E<sub>B3LYP/def2-SVP(Fe:def2-TZVP)/COSMO(<math>\epsilon = 35.88</math>):</sub></b>                                  |            |            |            |
| <b>-2985.7042212119 (&lt;S<sup>2</sup>&gt; 6.05358326)</b>                                                             |            |            |            |

|   |            |            |            |
|---|------------|------------|------------|
| H | 2.1675992  | 1.1448009  | 3.9720543  |
| H | 1.6287654  | 2.4607258  | 2.9189706  |
| C | 3.4757217  | 1.5218912  | 2.3004483  |
| H | 4.1005112  | 2.2929716  | 2.7815612  |
| H | 3.9767564  | 0.5523253  | 2.4287595  |
| N | 3.3507844  | 1.8029852  | 0.8389062  |
| C | 4.5631492  | 1.3774930  | 0.0811845  |
| H | 5.4765758  | 1.6939521  | 0.6132109  |
| H | 4.5402173  | 1.8924178  | -0.8895209 |
| C | 4.5402831  | -0.1221563 | -0.1441731 |
| H | 5.3449098  | -0.4020197 | -0.8421155 |
| H | 4.7413372  | -0.6546864 | 0.8004648  |
| N | 3.2208762  | -0.4630712 | -0.7020662 |
| C | 0.2831045  | -0.1649008 | 2.7381368  |
| N | -0.5713541 | 0.5046850  | 3.5540107  |
| C | -0.9153224 | 1.9055353  | 3.3284358  |
| H | -0.6127846 | 2.2151410  | 2.3210183  |
| H | -0.4420825 | 2.5690480  | 4.0711214  |
| H | -2.0073508 | 2.0231675  | 3.4162839  |
| C | -1.1750731 | -0.1021486 | 4.7404949  |
| H | -0.6655474 | -1.0401722 | 4.9891474  |
| H | -2.2514534 | -0.2973408 | 4.6045966  |
| H | -1.0565496 | 0.5926068  | 5.5868718  |
| N | 0.1068828  | -1.4887182 | 2.5565050  |
| C | -1.2133196 | -2.1157852 | 2.5332589  |
| H | -2.0012418 | -1.3570992 | 2.4708569  |
| H | -1.3831091 | -2.7486516 | 3.4190795  |
| H | -1.2811144 | -2.7492482 | 1.6358521  |
| C | 1.2144268  | -2.3876971 | 2.2503570  |
| H | 2.1693170  | -1.8953048 | 2.4656907  |
| H | 1.1891553  | -2.6952608 | 1.1937555  |
| H | 1.1267088  | -3.2850319 | 2.8832885  |
| C | 3.1249205  | 3.2529511  | 0.6248391  |
| H | 3.9962714  | 3.8229765  | 0.9888074  |
| H | 2.2333725  | 3.5902116  | 1.1674754  |
| H | 2.9884468  | 3.4554337  | -0.4436919 |
| C | 3.1095045  | -1.5008844 | -1.5580387 |
| N | 3.9130824  | -2.5931932 | -1.4605009 |
| C | 4.3610386  | -3.1244370 | -0.1765071 |
| H | 3.7758703  | -2.6922035 | 0.6423902  |
| H | 5.4318166  | -2.9291250 | -0.0009574 |
| H | 4.2058072  | -4.2151456 | -0.1705610 |
| C | 4.4030486  | -3.3139982 | -2.6351569 |
| H | 4.2309710  | -2.7236853 | -3.5427038 |
| H | 3.9227119  | -4.3000966 | -2.7453656 |
| H | 5.4877613  | -3.4708902 | -2.5228124 |
| N | 2.2085063  | -1.4572062 | -2.5647840 |
| C | 1.5105244  | -2.6496536 | -3.0388777 |

**E**<sub>B3LYP/def2-TZVPP/COSMO( $\epsilon = 35.88$ )</sub>:

**-2987.5970827314 (<S<sup>2</sup>> 6.05599834)**

**ZPE**<sub>B3LYP/def2-SVP(Fe:def2-TZVP)/COSMO( $\epsilon = 35.88$ )</sub>:

**0.791331**

**Chem. Pot.**<sub>(298.15)/B3LYP/def2-SVP(Fe:def2-</sub>

**TZVP)/COSMO( $\epsilon = 35.88$ ):**

**0.722174**



|    |            |            |            |                                                                                 |
|----|------------|------------|------------|---------------------------------------------------------------------------------|
| H  | 1.6974246  | -3.4966251 | -2.3692215 |                                                                                 |
| H  | 1.8115405  | -2.9217140 | -4.0636589 |                                                                                 |
| H  | 0.4279705  | -2.4444505 | -3.0402656 |                                                                                 |
| C  | 1.7679859  | -0.2070133 | -3.1714712 |                                                                                 |
| H  | 2.4522370  | 0.6060221  | -2.9042381 |                                                                                 |
| H  | 0.7489448  | 0.0550277  | -2.8472947 |                                                                                 |
| H  | 1.7677962  | -0.3255817 | -4.2667723 |                                                                                 |
| C  | 0.1070105  | 2.8506973  | -1.3056340 |                                                                                 |
| C  | -0.6838581 | 3.8413484  | -2.0067830 |                                                                                 |
| H  | -0.1623227 | 4.1380890  | -2.9297491 |                                                                                 |
| H  | -1.6696207 | 3.4218686  | -2.2610902 |                                                                                 |
| H  | -0.8166767 | 4.7257132  | -1.3649323 |                                                                                 |
| C  | -3.7527357 | 2.0917802  | -3.9113866 |                                                                                 |
| C  | -4.3395962 | 2.9998155  | -3.0220891 |                                                                                 |
| C  | -3.2659213 | 0.8690123  | -3.4359447 |                                                                                 |
| C  | -4.4320174 | 2.6797189  | -1.6625961 |                                                                                 |
| C  | -3.3506477 | 0.5429329  | -2.0741417 |                                                                                 |
| C  | -3.9373811 | 1.4598544  | -1.1783263 |                                                                                 |
| C  | -2.8303736 | -0.7719818 | -1.5295677 |                                                                                 |
| C  | -4.0104816 | 1.0915630  | 0.2898046  |                                                                                 |
| C  | -4.2652465 | -0.3877439 | 0.5000804  |                                                                                 |
| C  | -3.6889140 | -1.3054424 | -0.4007131 |                                                                                 |
| C  | -5.0488630 | -0.8609768 | 1.5628182  |                                                                                 |
| C  | -3.9128170 | -2.6783381 | -0.2227013 |                                                                                 |
| C  | -5.2582017 | -2.2330056 | 1.7406396  |                                                                                 |
| C  | -4.6895058 | -3.1443682 | 0.8437096  |                                                                                 |
| H  | -3.6820422 | 2.3310968  | -4.9759619 |                                                                                 |
| H  | -4.7310794 | 3.9534229  | -3.3866956 |                                                                                 |
| H  | -2.8200148 | 0.1536526  | -4.1338847 |                                                                                 |
| H  | -4.8971408 | 3.3857270  | -0.9678079 |                                                                                 |
| H  | -5.5045192 | -0.1465963 | 2.2555634  |                                                                                 |
| H  | -3.4747899 | -3.3908088 | -0.9285853 |                                                                                 |
| H  | -5.8722835 | -2.5886833 | 2.5725960  |                                                                                 |
| H  | -4.8561427 | -4.2177585 | 0.9697904  |                                                                                 |
| H  | -3.0434793 | 1.3552031  | 0.7657573  |                                                                                 |
| H  | -4.7712125 | 1.6964120  | 0.8063162  |                                                                                 |
| H  | -2.7430255 | -1.5169723 | -2.3356035 |                                                                                 |
| H  | -1.8010589 | -0.6189987 | -1.1436558 |                                                                                 |
| Fe | 4.5431323  | 9.1291806  | 2.8522580  | <b>[Fe<sup>IV</sup>(O)TMG<sub>2</sub>dien(MeCN)]<sup>2+</sup>-DHA-TS (σ)</b>    |
| N  | 4.1036280  | 10.4664865 | 1.2482468  | <b>E<sub>B3LYP/def2-SVP(Fe:def2-TZVP)/COSMO(ε = 35.88)</sub>:</b>               |
| O  | 2.9048843  | 8.9064313  | 3.2657224  | <b>-2985.6843261097 (&lt;S<sup>2</sup>&gt; 6.49026349)</b>                      |
| N  | 5.1707084  | 10.2112008 | 4.4272551  | <b>E<sub>B3LYP/def2-TZVPP/COSMO(ε = 35.88)</sub>:</b>                           |
| C  | 6.4576091  | 10.8890933 | 4.1943714  | <b>-2987.5758563751 (&lt;S<sup>2</sup>&gt; 6.48683816)</b>                      |
| H  | 6.8909234  | 11.2367717 | 5.1456273  | <b>ZPE<sub>E<sub>B3LYP/def2-SVP(Fe:def2-TZVP)/COSMO(ε = 35.88)</sub></sub>:</b> |
| H  | 6.3506301  | 11.7790217 | 3.5505171  |                                                                                 |
| C  | 7.4006293  | 9.8918956  | 3.5412084  |                                                                                 |
| H  | 8.3896785  | 10.3471822 | 3.3553167  |                                                                                 |

|   |           |            |           |
|---|-----------|------------|-----------|
| H | 7.5501237 | 9.0433360  | 4.2234183 |
| N | 6.8132034 | 9.3932337  | 2.2719853 |
| C | 7.2785998 | 8.0265709  | 1.9389830 |
| H | 8.3692313 | 7.9348547  | 2.0947519 |
| H | 7.0800298 | 7.8571483  | 0.8706531 |
| C | 6.5258692 | 6.9841756  | 2.7512170 |
| H | 6.8183554 | 5.9812552  | 2.4038341 |
| H | 6.8137020 | 7.0445612  | 3.8151975 |
| N | 5.0850381 | 7.2072496  | 2.5614029 |
| C | 4.4655898 | 10.5490176 | 5.5252269 |
| N | 4.4352358 | 11.8350909 | 5.9761469 |
| C | 4.4460850 | 12.9694276 | 5.0582017 |
| H | 4.2196778 | 12.6361822 | 4.0381196 |
| H | 5.4157254 | 13.4951669 | 5.0600434 |
| H | 3.6695350 | 13.6874909 | 5.3685997 |
| C | 4.4521449 | 12.1787079 | 7.3970699 |
| H | 4.6921607 | 11.2952301 | 8.0000755 |
| H | 3.4902916 | 12.5985216 | 7.7355040 |
| H | 5.2348348 | 12.9356664 | 7.5675588 |
| N | 3.7991867 | 9.6071538  | 6.2274718 |
| C | 2.5761002 | 9.8935968  | 6.9729093 |
| H | 2.1874957 | 10.8825971 | 6.7081530 |
| H | 2.7398931 | 9.8478955  | 8.0618868 |
| H | 1.8154904 | 9.1452150  | 6.7046725 |
| C | 4.1776132 | 8.2002311  | 6.1943326 |
| H | 5.2129898 | 8.0985916  | 5.8495677 |
| H | 3.5115396 | 7.6300185  | 5.5277546 |
| H | 4.1006024 | 7.7868311  | 7.2121303 |
| C | 7.1300232 | 10.3175602 | 1.1661374 |
| H | 8.2185687 | 10.3349596 | 0.9766205 |
| H | 6.8056181 | 11.3370883 | 1.4121530 |
| H | 6.6178094 | 9.9975976  | 0.2496533 |
| C | 4.2779869 | 6.1459487  | 2.3917240 |
| N | 4.5232552 | 4.9506297  | 2.9982469 |
| C | 5.1069179 | 4.8570683  | 4.3321349 |
| H | 5.0887451 | 5.8336945  | 4.8265301 |
| H | 6.1455100 | 4.4877237  | 4.3024705 |
| H | 4.5100507 | 4.1541498  | 4.9356487 |
| C | 4.2646256 | 3.6687788  | 2.3444292 |
| H | 4.0710871 | 3.8178486  | 1.2757888 |
| H | 3.4118550 | 3.1365439  | 2.7975554 |
| H | 5.1592391 | 3.0336793  | 2.4484881 |
| N | 3.2051336 | 6.2309320  | 1.5684279 |
| C | 1.9662778 | 5.5010430  | 1.8199389 |
| H | 1.9710042 | 5.0720891  | 2.8285622 |
| H | 1.8032205 | 4.6961285  | 1.0845682 |
| H | 1.1199181 | 6.2021738  | 1.7471451 |
| C | 3.1711197 | 7.1336666  | 0.4242080 |

**0.784392**

**Chem. Pot.**(298.15)/B3LYP/def2-SVP(Fe:def2-

TZVP)/COSMO( $\epsilon = 35.88$ ):

**0.715142**

|   |            |            |            |
|---|------------|------------|------------|
| H | 4.1867952  | 7.4541830  | 0.1650045  |
| H | 2.5544949  | 8.0228169  | 0.6287867  |
| H | 2.7397479  | 6.5999443  | -0.4375134 |
| C | 3.7578835  | 11.2120961 | 0.4355629  |
| C | 3.3329581  | 12.1478189 | -0.5854916 |
| H | 3.6167432  | 11.7629791 | -1.5770192 |
| H | 2.2402259  | 12.2724397 | -0.5404556 |
| H | 3.8203725  | 13.1205323 | -0.4185276 |
| C | -0.3685074 | 10.7176297 | -0.3200550 |
| C | -0.5233787 | 12.0608046 | 0.0511364  |
| C | -0.0948256 | 9.7575576  | 0.6550700  |
| C | -0.4009135 | 12.4319937 | 1.3951121  |
| C | 0.0267230  | 10.1197037 | 2.0107490  |
| C | -0.1232854 | 11.4764053 | 2.3811375  |
| C | 0.2996187  | 9.1066288  | 3.0646954  |
| C | 0.0284357  | 11.8598972 | 3.8363507  |
| C | -0.4080314 | 10.7715266 | 4.7922665  |
| C | -0.2520310 | 9.4193033  | 4.4083601  |
| C | -0.9449435 | 11.0706363 | 6.0510029  |
| C | -0.6261414 | 8.3985918  | 5.3041022  |
| C | -1.3155285 | 10.0492987 | 6.9328857  |
| C | -1.1546891 | 8.7082181  | 6.5577346  |
| H | -0.4718551 | 10.4202635 | -1.3668747 |
| H | -0.7488424 | 12.8174391 | -0.7052058 |
| H | 0.0073467  | 8.7067482  | 0.3693986  |
| H | -0.5311917 | 13.4793631 | 1.6832158  |
| H | -1.0786694 | 12.1162997 | 6.3439600  |
| H | -0.5090425 | 7.3530594  | 5.0041990  |
| H | -1.7361164 | 10.2994729 | 7.9105385  |
| H | -1.4483643 | 7.9069098  | 7.2409025  |
| H | 1.1004293  | 12.0786920 | 4.0249217  |
| H | -0.5031979 | 12.8001954 | 4.0480534  |
| H | 0.0726594  | 8.0802558  | 2.7405350  |
| H | 1.5288274  | 9.0430166  | 3.1873587  |

|    |           |            |            |
|----|-----------|------------|------------|
| Fe | 1.4706147 | 0.4120464  | 0.2147883  |
| N  | 0.5786991 | 2.1364768  | -0.6693640 |
| O  | 0.0613122 | -0.6567263 | -0.2174985 |
| N  | 1.3060805 | 0.5623444  | 2.2236161  |
| C  | 2.1124345 | 1.6280819  | 2.8391072  |
| H  | 2.2324957 | 1.4496616  | 3.9197995  |
| H  | 1.6422412 | 2.6207097  | 2.7325983  |
| C  | 3.4792364 | 1.6366417  | 2.1720560  |
| H  | 4.1211296 | 2.4236552  | 2.6070349  |
| H  | 3.9710295 | 0.6715891  | 2.3576628  |
| N  | 3.3370224 | 1.8317889  | 0.7084480  |
| C  | 4.4595419 | 1.2315849  | -0.0473445 |
| H  | 5.4306375 | 1.5119193  | 0.4016195  |

**$[\text{Fe}^{\text{IV}}(\text{O})\text{TMG}_2\text{dien}(\text{MeCN})]^{2+}\text{-DHA-IC } (\sigma)$**

**$E_{\text{B3LYP/def2-SVP(Fe: def2-TZVP)/COSMO}(\epsilon = 35.88)}$ :**

**-2985.7220368753 (<S<sup>2</sup>> 7.03807160)**

**$E_{\text{B3LYP/def2-TZVPP/COSMO}(\epsilon = 35.88)}$ :**

**-2987.6160271672 (<S<sup>2</sup>> 7.03583511)**

**ZPE $_{\text{B3LYP/def2-SVP(Fe: def2-TZVP)/COSMO}(\epsilon = 35.88)}$ :**

**0.78681**

**Chem. Pot. $_{(298.15)/\text{B3LYP/def2-SVP(Fe: def2-}}$**

**$\text{TZVP)/COSMO}(\epsilon = 35.88)$ :**

|   |            |            |            |
|---|------------|------------|------------|
| H | 4.4330507  | 1.6459184  | -1.0660689 |
| C | 4.3244894  | -0.2829282 | -0.1257160 |
| H | 5.1119768  | -0.6762409 | -0.7874499 |
| H | 4.4955548  | -0.7339095 | 0.8668325  |
| N | 2.9904471  | -0.6036727 | -0.6499433 |
| C | 0.3673302  | -0.0502526 | 2.9727865  |
| N | -0.3620831 | 0.6306130  | 3.8993550  |
| C | -0.7615823 | 2.0198364  | 3.6988045  |
| H | -0.6322377 | 2.3063476  | 2.6480904  |
| H | -0.1870959 | 2.7127587  | 4.3360312  |
| H | -1.8278563 | 2.1247823  | 3.9568830  |
| C | -0.7752355 | 0.0375006  | 5.1702878  |
| H | -0.2398601 | -0.9036071 | 5.3422221  |
| H | -1.8610932 | -0.1509002 | 5.2075543  |
| H | -0.5206234 | 0.7352819  | 5.9842573  |
| N | 0.1429510  | -1.3763766 | 2.8323454  |
| C | -1.1856722 | -1.9660622 | 2.9730375  |
| H | -1.9476083 | -1.1829516 | 3.0550625  |
| H | -1.2509531 | -2.6280873 | 3.8518518  |
| H | -1.4045487 | -2.5597091 | 2.0718322  |
| C | 1.1711161  | -2.2945155 | 2.3583396  |
| H | 2.1618261  | -1.8400530 | 2.4753102  |
| H | 1.0060446  | -2.5570270 | 1.3012730  |
| H | 1.1313209  | -3.2152268 | 2.9617324  |
| C | 3.2215405  | 3.2662568  | 0.3897919  |
| H | 4.1516285  | 3.8012559  | 0.6554509  |
| H | 2.3917130  | 3.7190924  | 0.9484705  |
| H | 3.0351333  | 3.3991005  | -0.6838298 |
| C | 2.8545484  | -1.6273756 | -1.5135524 |
| N | 3.6234550  | -2.7471063 | -1.4296590 |
| C | 4.0876781  | -3.2824906 | -0.1539284 |
| H | 3.5417311  | -2.8212342 | 0.6756942  |
| H | 5.1686699  | -3.1211886 | -0.0085455 |
| H | 3.8961498  | -4.3673366 | -0.1312632 |
| C | 4.0647569  | -3.4885029 | -2.6100414 |
| H | 3.8911506  | -2.8979008 | -3.5171141 |
| H | 3.5512577  | -4.4596119 | -2.7048708 |
| H | 5.1462867  | -3.6798444 | -2.5212272 |
| N | 1.9527004  | -1.5516160 | -2.5227372 |
| C | 1.1886994  | -2.7104269 | -2.9734816 |
| H | 1.3685957  | -3.5694682 | -2.3175346 |
| H | 1.4346922  | -2.9872806 | -4.0116967 |
| H | 0.1151420  | -2.4642136 | -2.9268050 |
| C | 1.5633515  | -0.2855324 | -3.1296597 |
| H | 2.2867735  | 0.4972020  | -2.8736886 |
| H | 0.5599231  | 0.0264031  | -2.7986149 |
| H | 1.5469325  | -0.4052186 | -4.2249203 |
| C | 0.0197421  | 3.0385489  | -1.1285608 |

**0.716232**

|   |            |            |            |
|---|------------|------------|------------|
| C | -0.6722433 | 4.1748392  | -1.6992675 |
| H | -0.0526391 | 4.6188257  | -2.4935504 |
| H | -1.6329803 | 3.8483430  | -2.1267828 |
| H | -0.8548140 | 4.9253496  | -0.9149267 |
| C | -3.2746422 | 2.4237485  | -3.9614968 |
| C | -4.1347507 | 3.1777004  | -3.1440056 |
| C | -2.8747329 | 1.1543227  | -3.5598846 |
| C | -4.5790211 | 2.6486737  | -1.9252772 |
| C | -3.3248234 | 0.5986247  | -2.3311541 |
| C | -4.1879516 | 1.3747455  | -1.5005532 |
| C | -2.9630315 | -0.7289683 | -1.9408279 |
| C | -4.6477453 | 0.8354156  | -0.1639685 |
| C | -4.3888725 | -0.6353085 | 0.0785900  |
| C | -3.5230853 | -1.3663409 | -0.7899843 |
| C | -4.9704895 | -1.2891456 | 1.1695456  |
| C | -3.2674822 | -2.7366970 | -0.5084623 |
| C | -4.7145963 | -2.6415757 | 1.4275274  |
| C | -3.8554776 | -3.3649042 | 0.5825086  |
| H | -2.9254151 | 2.8316616  | -4.9137971 |
| H | -4.4590908 | 4.1733501  | -3.4575537 |
| H | -2.2170446 | 0.5584627  | -4.1993964 |
| H | -5.2472395 | 3.2406802  | -1.2922447 |
| H | -5.6404196 | -0.7311247 | 1.8310762  |
| H | -2.6059469 | -3.2976505 | -1.1747835 |
| H | -5.1845918 | -3.1321357 | 2.2838677  |
| H | -3.6538785 | -4.4212142 | 0.7796442  |
| H | -4.1455293 | 1.4161022  | 0.6372545  |
| H | -5.7206671 | 1.0536995  | -0.0228362 |
| H | -2.3212015 | -1.3143351 | -2.6054465 |
| H | -0.8643775 | -0.5213988 | -0.4669635 |

**[Fe<sup>IV</sup>(O)TMG<sub>2</sub>dien(MeCN)]<sup>2+</sup> (π) pathway**

|    |            |            |            |
|----|------------|------------|------------|
| Fe | 0.5950928  | 0.6550936  | 0.5563116  |
| N  | -0.4898703 | -0.4313406 | 2.0220278  |
| O  | -0.4168192 | 0.1828271  | -0.6306163 |
| N  | 2.1244200  | -0.4380607 | -0.0201422 |
| C  | 3.2783225  | -0.3827889 | 0.8942791  |
| H  | 4.2139457  | -0.5962543 | 0.3528600  |
| H  | 3.2095180  | -1.1198497 | 1.7120498  |
| C  | 3.3263609  | 1.0242655  | 1.4636484  |
| H  | 4.1214900  | 1.1288602  | 2.2208326  |
| H  | 3.5340484  | 1.7383134  | 0.6545349  |
| N  | 2.0004357  | 1.3593932  | 2.0637167  |
| C  | 1.7923221  | 2.8324057  | 2.1729174  |
| H  | 2.7005237  | 3.3181293  | 2.5688039  |
| H  | 0.9785649  | 2.9957555  | 2.8933698  |
| C  | 1.3943925  | 3.4055062  | 0.8262575  |

**[Fe<sup>IV</sup>(O)TMG<sub>2</sub>dien(MeCN)]<sup>2+</sup>-CHD-RC (π)**

**E<sub>B3LYP/def2-SVP(Fe:def2-TZVP)/COSMO(ε = 35.88)</sub>:**

**-2678.7948298231 (<S<sup>2</sup>> 6.05337167)**

**E<sub>B3LYP/def2-TZVPP/COSMO(ε = 35.88)</sub>:**

**-2680.3652325018 (<S<sup>2</sup>> 6.05576575)**

**ZPE<sub>B3LYP/def2-SVP(Fe:def2-TZVP)/COSMO(ε = 35.88)</sub>:**

**0.69563**

**Chem. Pot.<sub>(298.15)/B3LYP/def2-SVP(Fe:def2-</sub>**

**TZVP)/COSMO(ε = 35.88):**

**0.63033**

|   |            |            |            |
|---|------------|------------|------------|
| H | 1.0802048  | 4.4538026  | 0.9499097  |
| H | 2.2593819  | 3.4129132  | 0.1420307  |
| N | 0.2866611  | 2.5840701  | 0.3102385  |
| C | 2.1230658  | -1.3572377 | -1.0159439 |
| N | 2.5670352  | -2.6216788 | -0.7985122 |
| C | 2.3926194  | -3.2917556 | 0.4869458  |
| H | 1.6664470  | -2.7491689 | 1.1035730  |
| H | 3.3449814  | -3.3806814 | 1.0355212  |
| H | 2.0052125  | -4.3076253 | 0.3087065  |
| C | 3.2773023  | -3.3978023 | -1.8150818 |
| H | 3.5945886  | -2.7463052 | -2.6375381 |
| H | 2.6600588  | -4.2180375 | -2.2166177 |
| H | 4.1756406  | -3.8377650 | -1.3538775 |
| N | 1.7052684  | -1.0198787 | -2.2530515 |
| C | 1.0091699  | -1.9584591 | -3.1302813 |
| H | 0.7207166  | -2.8584574 | -2.5754241 |
| H | 1.6245205  | -2.2468889 | -3.9976719 |
| H | 0.0933174  | -1.4725486 | -3.5020291 |
| C | 1.8019600  | 0.3425972  | -2.7655436 |
| H | 2.4794782  | 0.9325865  | -2.1380962 |
| H | 0.8123917  | 0.8240249  | -2.7905593 |
| H | 2.2062183  | 0.3076387  | -3.7898067 |
| C | 1.8884278  | 0.7489675  | 3.4105251  |
| H | 2.6547530  | 1.1773324  | 4.0783830  |
| H | 2.0359371  | -0.3364827 | 3.3572309  |
| H | 0.8962075  | 0.9515086  | 3.8302238  |
| C | -0.6555690 | 3.1540289  | -0.4705571 |
| N | -0.3565426 | 4.1797147  | -1.3113318 |
| C | 0.9180737  | 4.2651954  | -2.0181192 |
| H | 1.4474970  | 3.3071942  | -1.9705356 |
| H | 1.5643078  | 5.0587804  | -1.6080165 |
| H | 0.7213193  | 4.4962469  | -3.0772140 |
| C | -1.2821315 | 5.2838045  | -1.5632132 |
| H | -2.0941681 | 5.2745592  | -0.8268356 |
| H | -1.7102744 | 5.2413683  | -2.5782037 |
| H | -0.7316664 | 6.2328201  | -1.4619839 |
| N | -1.9381342 | 2.7333248  | -0.4035489 |
| C | -2.8128805 | 2.7079147  | -1.5733209 |
| H | -2.2405743 | 2.9089491  | -2.4858558 |
| H | -3.6329053 | 3.4394889  | -1.4886365 |
| H | -3.2544694 | 1.7020946  | -1.6587754 |
| C | -2.5108972 | 2.1492923  | 0.8032130  |
| H | -1.8773381 | 2.3706650  | 1.6694284  |
| H | -2.6203645 | 1.0582375  | 0.7034726  |
| H | -3.5073963 | 2.5881972  | 0.9704140  |
| C | -1.1578802 | -1.1014905 | 2.6859130  |
| C | -2.0000296 | -1.9430178 | 3.5110935  |
| H | -2.5106007 | -1.3254737 | 4.2658600  |

|    |            |            |            |                                                                                             |
|----|------------|------------|------------|---------------------------------------------------------------------------------------------|
| H  | -2.7487167 | -2.4403349 | 2.8739192  |                                                                                             |
| H  | -1.3824443 | -2.7004400 | 4.0175841  |                                                                                             |
| C  | -2.7242650 | -4.8416207 | -0.9101160 |                                                                                             |
| C  | -3.5937595 | -4.9755386 | 0.3130312  |                                                                                             |
| C  | -4.2200798 | -3.6717406 | 0.7352010  |                                                                                             |
| C  | -4.0125735 | -2.5105851 | 0.0966651  |                                                                                             |
| C  | -3.1299000 | -2.3730851 | -1.1166158 |                                                                                             |
| C  | -2.5204251 | -3.6814194 | -1.5485731 |                                                                                             |
| H  | -2.2459611 | -5.7555543 | -1.2807532 |                                                                                             |
| H  | -4.8842285 | -3.6991860 | 1.6070192  |                                                                                             |
| H  | -4.5093525 | -1.6016261 | 0.4561541  |                                                                                             |
| H  | -1.8796693 | -3.6603014 | -2.4376538 |                                                                                             |
| H  | -2.3302889 | -1.6289522 | -0.9240617 |                                                                                             |
| H  | -3.7093017 | -1.9318131 | -1.9529915 |                                                                                             |
| H  | -4.3846789 | -5.7317183 | 0.1338586  |                                                                                             |
| H  | -3.0061399 | -5.4023399 | 1.1510369  |                                                                                             |
| Fe | 0.4653340  | 0.6314797  | 0.5668364  | <b>[Fe<sup>IV</sup>(O)TMG<sub>2</sub>dien(MeCN)]<sup>2+</sup>-CHD-TS (<math>\pi</math>)</b> |
| N  | -0.3773204 | -0.4196315 | 2.1898100  | <b>E<sub>B3LYP/def2-SVP(Fe:def2-TZVP)/COSMO(<math>\epsilon</math> = 35.88):</sub></b>       |
| O  | -0.6400653 | 0.0205103  | -0.5870524 | <b>-2678.7696620860 (&lt;S<sup>2</sup>&gt; 6.06685088)</b>                                  |
| N  | 2.0676240  | -0.4218714 | -0.0108930 | <b>E<sub>B3LYP/def2-TZVPP/COSMO(<math>\epsilon</math> = 35.88):</sub></b>                   |
| C  | 3.1760447  | -0.2880030 | 0.9467549  | <b>-2680.3378005802 (&lt;S<sup>2</sup>&gt; 6.06849822)</b>                                  |
| H  | 4.1327249  | -0.5857210 | 0.4884847  | <b>ZPE<sub>B3LYP/def2-SVP(Fe:def2-TZVP)/COSMO(<math>\epsilon</math> = 35.88):</sub></b>     |
| H  | 3.0420970  | -0.9214911 | 1.8407019  | <b>0.689043</b>                                                                             |
| C  | 3.2385507  | 1.1754432  | 1.3501080  | <b>Chem. Pot.<sub>(298.15)/B3LYP/def2-SVP(Fe:def2-</sub></b>                                |
| H  | 4.0355335  | 1.3592975  | 2.0907899  | <b>TZVP)/COSMO(<math>\epsilon</math> = 35.88):</b>                                          |
| H  | 3.4560766  | 1.7849825  | 0.4619437  | <b>0.624368</b>                                                                             |
| N  | 1.9195190  | 1.5966099  | 1.9057674  |                                                                                             |
| C  | 1.7088500  | 3.0667141  | 1.7733993  |                                                                                             |
| H  | 2.6413054  | 3.6092688  | 2.0062948  |                                                                                             |
| H  | 0.9531927  | 3.3617273  | 2.5150332  |                                                                                             |
| C  | 1.1956358  | 3.3992396  | 0.3849306  |                                                                                             |
| H  | 0.9070286  | 4.4612556  | 0.3458055  |                                                                                             |
| H  | 1.9942163  | 3.2598305  | -0.3645069 |                                                                                             |
| N  | 0.0428208  | 2.5242403  | 0.1311492  |                                                                                             |
| C  | 2.1963124  | -1.3101225 | -1.0142162 |                                                                                             |
| N  | 2.8093218  | -2.5114186 | -0.8128765 |                                                                                             |
| C  | 2.6782377  | -3.2331081 | 0.4481085  |                                                                                             |
| H  | 1.8562611  | -2.8140506 | 1.0408066  |                                                                                             |
| H  | 3.6066818  | -3.2001590 | 1.0429730  |                                                                                             |
| H  | 2.4492572  | -4.2899246 | 0.2341086  |                                                                                             |
| C  | 3.6838781  | -3.1343359 | -1.8043815 |                                                                                             |
| H  | 3.9293502  | -2.4196241 | -2.5986151 |                                                                                             |
| H  | 3.2310099  | -4.0340010 | -2.2535319 |                                                                                             |
| H  | 4.6218111  | -3.4343733 | -1.3094224 |                                                                                             |
| N  | 1.7608461  | -1.0132147 | -2.2586052 |                                                                                             |
| C  | 1.2864395  | -2.0281262 | -3.1948080 |                                                                                             |
| H  | 1.1071492  | -2.9754095 | -2.6746391 |                                                                                             |

|   |            |            |            |
|---|------------|------------|------------|
| H | 1.9989902  | -2.1930274 | -4.0196104 |
| H | 0.3345672  | -1.6866455 | -3.6299762 |
| C | 1.6313823  | 0.3598792  | -2.7302300 |
| H | 2.2237768  | 1.0300975  | -2.0969214 |
| H | 0.5781386  | 0.6796825  | -2.7148579 |
| H | 2.0115872  | 0.4188250  | -3.7624061 |
| C | 1.8411693  | 1.2221521  | 3.3370782  |
| H | 2.5916505  | 1.7884432  | 3.9147718  |
| H | 2.0370549  | 0.1507153  | 3.4662878  |
| H | 0.8434403  | 1.4520686  | 3.7305028  |
| C | -1.0229189 | 3.0024511  | -0.5303718 |
| N | -0.9040393 | 3.9651460  | -1.4877800 |
| C | 0.2394458  | 4.0340449  | -2.3909689 |
| H | 0.8225378  | 3.1088413  | -2.3403903 |
| H | 0.8973730  | 4.8883878  | -2.1597715 |
| H | -0.1266386 | 4.1533497  | -3.4236625 |
| C | -1.9000742 | 5.0197298  | -1.6673741 |
| H | -2.5876272 | 5.0431350  | -0.8137841 |
| H | -2.4798009 | 4.8883809  | -2.5962616 |
| H | -1.3811571 | 5.9905059  | -1.7220808 |
| N | -2.2687630 | 2.5646320  | -0.2270595 |
| C | -3.3057487 | 2.4030303  | -1.2415863 |
| H | -2.8863822 | 2.5403601  | -2.2446417 |
| H | -4.1380863 | 3.1111869  | -1.0956847 |
| H | -3.7109094 | 1.3801070  | -1.1765994 |
| C | -2.6189008 | 2.0726012  | 1.0975112  |
| H | -1.8830468 | 2.4128727  | 1.8352828  |
| H | -2.6685570 | 0.9724815  | 1.1201550  |
| H | -3.6082703 | 2.4697142  | 1.3753055  |
| C | -0.8335628 | -1.0316376 | 3.0575414  |
| C | -1.4016754 | -1.7919931 | 4.1526716  |
| H | -2.4712926 | -1.5529665 | 4.2534996  |
| H | -1.2841430 | -2.8681096 | 3.9556366  |
| H | -0.8836451 | -1.5352690 | 5.0892674  |
| C | -1.6179141 | -4.1400735 | -1.1354906 |
| C | -1.9148783 | -4.6230115 | 0.2545827  |
| C | -2.6471490 | -3.6156921 | 1.0929444  |
| C | -2.8878224 | -2.3547413 | 0.6746549  |
| C | -2.4244678 | -1.8531423 | -0.6326622 |
| C | -1.8782506 | -2.8785707 | -1.5397137 |
| H | -1.1962490 | -4.8647572 | -1.8400411 |
| H | -3.0155297 | -3.9485295 | 2.0691442  |
| H | -3.4524088 | -1.6694629 | 1.3158784  |
| H | -1.6694454 | -2.5843679 | -2.5722625 |
| H | -1.4890286 | -0.9918185 | -0.4687026 |
| H | -3.1197386 | -1.1484730 | -1.1176774 |
| H | -2.4909762 | -5.5694424 | 0.2121721  |
| H | -0.9728376 | -4.9257511 | 0.7611561  |



|    |            |            |            |
|----|------------|------------|------------|
| Fe | 0.4285230  | 0.6192748  | 0.6001255  |
| N  | -0.7148046 | -0.4484004 | 2.0177602  |
| O  | -0.7026364 | 0.1633923  | -0.7251009 |
| N  | 1.8967972  | -0.6620971 | 0.1339692  |
| C  | 2.9198026  | -0.6891152 | 1.1888410  |
| H  | 3.8732000  | -1.0888613 | 0.8076523  |
| H  | 2.6301955  | -1.3210774 | 2.0458300  |
| C  | 3.1156218  | 0.7477568  | 1.6425089  |
| H  | 3.8405622  | 0.8213320  | 2.4701952  |
| H  | 3.4968914  | 1.3446977  | 0.8023785  |
| N  | 1.8019209  | 1.3209795  | 2.0720520  |
| C  | 1.8054802  | 2.8147951  | 1.9954689  |
| H  | 2.7751393  | 3.2087900  | 2.3428742  |
| H  | 1.0260766  | 3.1821458  | 2.6774488  |
| C  | 1.4802718  | 3.2594201  | 0.5823231  |
| H  | 1.3185418  | 4.3485821  | 0.5663183  |
| H  | 2.3291196  | 3.0537008  | -0.0928350 |
| N  | 0.2676099  | 2.5309918  | 0.1834576  |
| C  | 1.9770202  | -1.5495008 | -0.8734198 |
| N  | 2.3963277  | -2.8279029 | -0.6552651 |
| C  | 2.0874580  | -3.5369250 | 0.5819213  |
| H  | 1.2978970  | -3.0126464 | 1.1334631  |
| H  | 2.9726396  | -3.6416730 | 1.2316233  |
| H  | 1.7264197  | -4.5485662 | 0.3345467  |
| C  | 3.2211869  | -3.5645839 | -1.6111176 |
| H  | 3.6119593  | -2.8860453 | -2.3784278 |
| H  | 2.6633955  | -4.3811153 | -2.0993266 |
| H  | 4.0751735  | -4.0073758 | -1.0735264 |
| N  | 1.6741449  | -1.1834121 | -2.1398186 |
| C  | 1.0738678  | -2.1015223 | -3.1033338 |
| H  | 0.7317555  | -3.0136826 | -2.6013125 |
| H  | 1.7756114  | -2.3717634 | -3.9093206 |
| H  | 0.2002831  | -1.6100664 | -3.5602743 |
| C  | 1.8077241  | 0.1915977  | -2.6048076 |
| H  | 2.4536581  | 0.7558826  | -1.9222042 |
| H  | 0.8234602  | 0.6801794  | -2.6644958 |
| H  | 2.2692240  | 0.1854651  | -3.6051640 |
| C  | 1.5128598  | 0.9095328  | 3.4684103  |
| H  | 2.2560893  | 1.3585137  | 4.1481955  |
| H  | 1.5608249  | -0.1814254 | 3.5659048  |
| H  | 0.5120816  | 1.2514737  | 3.7591484  |
| C  | -0.6680910 | 3.1412718  | -0.5631739 |
| N  | -0.3424751 | 4.0970000  | -1.4778186 |
| C  | 0.8886806  | 4.0456584  | -2.2589448 |
| H  | 1.3535497  | 3.0577018  | -2.1759173 |
| H  | 1.6126610  | 4.8134448  | -1.9387236 |
| H  | 0.6473350  | 4.2236146  | -3.3194278 |
| C  | -1.1901240 | 5.2605057  | -1.7314206 |

**[Fe<sup>IV</sup>(O)TMG<sub>2</sub>dien(MeCN)]<sup>2+</sup>-CHD-IC ( $\pi$ )**

**E**<sub>B3LYP/def2-SVP(Fe:def2-TZVP)/COSMO( $\epsilon$  = 35.88):</sub>

**-2678.8130470238 (<S<sup>2</sup>> 6.08665171)**

**E**<sub>B3LYP/def2-TZVPP/COSMO( $\epsilon$  = 35.88):</sub>

**-2680.3838297758 (<S<sup>2</sup>> 6.08556742)**

**ZPE**<sub>B3LYP/def2-SVP(Fe:def2-TZVP)/COSMO( $\epsilon$  = 35.88):</sub>

**0.693289**

**Chem. Pot.**<sub>(298.15)/B3LYP/def2-SVP(Fe:def2-</sub>

**TZVP)/COSMO( $\epsilon$  = 35.88):**

**0.627817**

|   |            |            |            |
|---|------------|------------|------------|
| H | -1.9544839 | 5.3511481  | -0.9507215 |
| H | -1.6830109 | 5.2069561  | -2.7164636 |
| H | -0.5625453 | 6.1662075  | -1.7112423 |
| N | -1.9791680 | 2.8517505  | -0.3905871 |
| C | -2.9187457 | 2.8101643  | -1.5069902 |
| H | -2.3906582 | 2.9331533  | -2.4591342 |
| H | -3.6947791 | 3.5881627  | -1.4186368 |
| H | -3.4148870 | 1.8258345  | -1.5153797 |
| C | -2.5102058 | 2.3656631  | 0.8742825  |
| H | -1.8159277 | 2.5942275  | 1.6912670  |
| H | -2.6894094 | 1.2793805  | 0.8420437  |
| H | -3.4691566 | 2.8696282  | 1.0749427  |
| C | -1.3751166 | -1.0537769 | 2.7489695  |
| C | -2.1974269 | -1.8038916 | 3.6771874  |
| H | -3.2233607 | -1.4055372 | 3.6677647  |
| H | -2.2153239 | -2.8636388 | 3.3818321  |
| H | -1.7823949 | -1.7138136 | 4.6926394  |
| C | -2.1381616 | -4.1187016 | -1.4853968 |
| C | -2.5596493 | -4.7885294 | -0.2096627 |
| C | -3.4322425 | -3.9320518 | 0.6618905  |
| C | -3.7873778 | -2.6564966 | 0.3058668  |
| C | -3.3425373 | -2.0763505 | -0.9171574 |
| C | -2.5226767 | -2.8388864 | -1.7962151 |
| H | -1.5178542 | -4.6920583 | -2.1813939 |
| H | -3.7970680 | -4.3648441 | 1.5987094  |
| H | -4.4375659 | -2.0725798 | 0.9651901  |
| H | -2.2032088 | -2.3939736 | -2.7433841 |
| H | -1.1518071 | -0.6790737 | -0.5412463 |
| H | -3.6570293 | -1.0678570 | -1.1947645 |
| H | -3.0745649 | -5.7491611 | -0.4361689 |
| H | -1.6656589 | -5.1310201 | 0.3593395  |

|    |           |            |            |
|----|-----------|------------|------------|
| Fe | 1.6778791 | 0.5836997  | 0.3596301  |
| N  | 0.5530954 | 2.2253560  | -0.3808925 |
| O  | 0.6393553 | -0.4993540 | -0.2766485 |
| N  | 1.2029140 | 0.2500286  | 2.2368001  |
| C  | 1.8616121 | 1.1589031  | 3.1914747  |
| H  | 1.9425307 | 0.6882183  | 4.1843580  |
| H  | 1.3084584 | 2.1030265  | 3.3314084  |
| C  | 3.2497782 | 1.4433750  | 2.6453504  |
| H  | 3.7876385 | 2.1793379  | 3.2661958  |
| H  | 3.8362067 | 0.5140898  | 2.6382684  |
| N  | 3.1344934 | 1.9437955  | 1.2428104  |
| C  | 4.3992246 | 1.7544249  | 0.4750439  |
| H  | 5.2659692 | 2.0604977  | 1.0854559  |
| H  | 4.3518880 | 2.4147552  | -0.4022510 |
| C  | 4.5218356 | 0.3145170  | 0.0148514  |
| H  | 5.3657139 | 0.2227154  | -0.6867856 |

**[Fe<sup>IV</sup>(O)TMG<sub>2</sub>dien(MeCN)]<sup>2+</sup>-DHA-RC (π)**

**E**<sub>B3LYP/def2-SVP(Fe:def2-TZVP)/COSMO(ε = 35.88):</sub>

**-2985.7042299745 (<S<sup>2</sup>> 6.05361025)**

**E**<sub>B3LYP/def2-TZVPP/COSMO(ε = 35.88):</sub>

**-2987.5970932176 (<S<sup>2</sup>> 6.05600842)**

**ZPE**<sub>B3LYP/def2-SVP(Fe:def2-TZVP)/COSMO(ε = 35.88):</sub>

**0.791332**

**Chem. Pot.**<sub>(298.15)/B3LYP/def2-SVP(Fe:def2-</sub>

**TZVP)/COSMO(ε = 35.88):**

**0.722209**

|   |            |            |            |
|---|------------|------------|------------|
| H | 4.7487666  | -0.3432311 | 0.8705500  |
| N | 3.2538780  | -0.0472991 | -0.6407085 |
| C | 0.2208934  | -0.5694648 | 2.6871654  |
| N | -0.7114776 | -0.1195459 | 3.5660183  |
| C | -1.1807110 | 1.2629161  | 3.5528623  |
| H | -0.8856355 | 1.7570792  | 2.6195826  |
| H | -0.7893878 | 1.8372942  | 4.4088723  |
| H | -2.2806987 | 1.2667134  | 3.6168617  |
| C | -1.2822779 | -0.9615111 | 4.6175359  |
| H | -0.6925147 | -1.8780894 | 4.7330462  |
| H | -2.3321315 | -1.2274445 | 4.4119911  |
| H | -1.2490126 | -0.4048699 | 5.5673465  |
| N | 0.1744761  | -1.8569509 | 2.2911682  |
| C | -1.0797770 | -2.5875910 | 2.1189665  |
| H | -1.9341792 | -1.9024358 | 2.1483247  |
| H | -1.2091885 | -3.3679234 | 2.8860119  |
| H | -1.0670691 | -3.0711717 | 1.1304216  |
| C | 1.3686135  | -2.5920024 | 1.8882980  |
| H | 2.2675736  | -2.0576059 | 2.2151301  |
| H | 1.3968570  | -2.7256472 | 0.7960696  |
| H | 1.3512278  | -3.5840981 | 2.3667834  |
| C | 2.7797145  | 3.3836920  | 1.2519125  |
| H | 3.5852201  | 3.9623534  | 1.7346233  |
| H | 1.8479260  | 3.5493967  | 1.8063009  |
| H | 2.6506169  | 3.7425178  | 0.2243267  |
| C | 3.2608773  | -0.9391924 | -1.6539325 |
| N | 4.1607150  | -1.9573545 | -1.6995110 |
| C | 4.6254060  | -2.6469313 | -0.4994870 |
| H | 3.9828454  | -2.4058960 | 0.3542612  |
| H | 5.6686560  | -2.3884358 | -0.2538501 |
| H | 4.5728462  | -3.7337290 | -0.6723489 |
| C | 4.7444471  | -2.4327821 | -2.9535766 |
| H | 4.5397782  | -1.7213511 | -3.7620894 |
| H | 4.3615655  | -3.4268482 | -3.2372813 |
| H | 5.8360619  | -2.5088814 | -2.8253686 |
| N | 2.3843420  | -0.8136764 | -2.6752807 |
| C | 1.8129000  | -1.9710901 | -3.3591704 |
| H | 2.0621454  | -2.8950802 | -2.8254756 |
| H | 2.1627909  | -2.0464144 | -4.4016292 |
| H | 0.7162330  | -1.8651304 | -3.3701275 |
| C | 1.8433464  | 0.4740173  | -3.0927665 |
| H | 2.4417561  | 1.2906638  | -2.6736684 |
| H | 0.7967222  | 0.5889687  | -2.7709342 |
| H | 1.8806870  | 0.5342503  | -4.1921829 |
| C | -0.1426359 | 3.0320701  | -0.8296940 |
| C | -1.0073593 | 4.0484510  | -1.3933236 |
| H | -0.4950676 | 4.5368491  | -2.2365007 |
| H | -1.9427665 | 3.5890752  | -1.7487991 |

|   |            |            |            |
|---|------------|------------|------------|
| H | -1.2382237 | 4.8011870  | -0.6240368 |
| C | -3.8530971 | 2.3619723  | -3.6647630 |
| C | -4.5433840 | 3.0561085  | -2.6640309 |
| C | -3.2635634 | 1.1266540  | -3.3737712 |
| C | -4.6359098 | 2.5112128  | -1.3780348 |
| C | -3.3479221 | 0.5761880  | -2.0861829 |
| C | -4.0390735 | 1.2780228  | -1.0775940 |
| C | -2.7179592 | -0.7579309 | -1.7404104 |
| C | -4.1102844 | 0.6696615  | 0.3084944  |
| C | -4.2288441 | -0.8409011 | 0.2685749  |
| C | -3.5477828 | -1.5436103 | -0.7453766 |
| C | -4.9882827 | -1.5497813 | 1.2109834  |
| C | -3.6447116 | -2.9416101 | -0.7987811 |
| C | -5.0708300 | -2.9456036 | 1.1580650  |
| C | -4.3980123 | -3.6434089 | 0.1486839  |
| H | -3.7812005 | 2.7773582  | -4.6736600 |
| H | -5.0150826 | 4.0174045  | -2.8853329 |
| H | -2.7361648 | 0.5779378  | -4.1602018 |
| H | -5.1814948 | 3.0495041  | -0.5969620 |
| H | -5.5251919 | -1.0020022 | 1.9916985  |
| H | -3.1251293 | -3.4869346 | -1.5927643 |
| H | -5.6673632 | -3.4860827 | 1.8981886  |
| H | -4.4651173 | -4.7335357 | 0.0943392  |
| H | -3.1834760 | 0.9374238  | 0.8566489  |
| H | -4.9362075 | 1.1113565  | 0.8865184  |
| H | -2.5417765 | -1.3502588 | -2.6517007 |
| H | -1.7169606 | -0.5781642 | -1.2959619 |

|    |            |            |            |
|----|------------|------------|------------|
| Fe | 1.7562054  | 0.5694450  | 0.3014995  |
| N  | 0.8544378  | 2.2694508  | -0.5603767 |
| O  | 0.4406693  | -0.4877354 | -0.0126906 |
| N  | 1.4482759  | 0.7886504  | 2.2684366  |
| C  | 2.2960473  | 1.8462268  | 2.8396475  |
| H  | 2.3541807  | 1.7572761  | 3.9361077  |
| H  | 1.9131365  | 2.8586307  | 2.6232312  |
| C  | 3.6800653  | 1.6731011  | 2.2399596  |
| H  | 4.3794784  | 2.4473111  | 2.5987419  |
| H  | 4.0805106  | 0.6932613  | 2.5351680  |
| N  | 3.5872544  | 1.7211754  | 0.7517831  |
| C  | 4.7181542  | 0.9915615  | 0.1098528  |
| H  | 5.6562625  | 1.1838284  | 0.6582081  |
| H  | 4.8359169  | 1.3875732  | -0.9085341 |
| C  | 4.4028979  | -0.4899192 | 0.0301502  |
| H  | 5.1764741  | -0.9976219 | -0.5664226 |
| H  | 4.4256426  | -0.9463618 | 1.0351516  |
| N  | 3.0803951  | -0.6094704 | -0.5992725 |
| C  | 0.5046788  | 0.2352346  | 3.0532268  |
| N  | -0.1981017 | 0.9904683  | 3.9455227  |

**$[Fe^{IV}(O)TMG_2dien(MeCN)]^{2+}$ -DHA-TS ( $\pi$ )**

**$E_{B3LYP/def2-SVP(Fe:def2-TZVP)/COSMO(\epsilon = 35.88)}$ :**

**-2985.6755525812 (<S<sup>2</sup>> 6.06687451)**

**$E_{B3LYP/def2-TZVPP/COSMO(\epsilon = 35.88)}$ :**

**-2987.5661503117 (<S<sup>2</sup>> 6.06864081)**

**$ZPE_{B3LYP/def2-SVP(Fe:def2-TZVP)/COSMO(\epsilon = 35.88)}$ :**

**0.784396**

**Chem. Pot.<sub>(298.15)/B3LYP/def2-SVP(Fe:def2-</sub>**

**$TZVP)/COSMO(\epsilon = 35.88)$ :**

**0.715554**

|   |            |            |            |
|---|------------|------------|------------|
| C | -0.5652350 | 2.3726403  | 3.6576601  |
| H | -0.4313923 | 2.5873848  | 2.5905826  |
| H | 0.0301171  | 3.0908726  | 4.2463627  |
| H | -1.6270513 | 2.5229643  | 3.9128135  |
| C | -0.5728791 | 0.5070640  | 5.2732259  |
| H | -0.0492883 | -0.4291316 | 5.4994621  |
| H | -1.6598163 | 0.3457377  | 5.3658000  |
| H | -0.2737155 | 1.2594743  | 6.0209691  |
| N | 0.2616269  | -1.0924004 | 3.0070483  |
| C | -1.0540393 | -1.6662055 | 3.2738922  |
| H | -1.8141854 | -0.8796494 | 3.3224259  |
| H | -1.0665209 | -2.2404344 | 4.2147924  |
| H | -1.3170295 | -2.3446033 | 2.4483147  |
| C | 1.2646702  | -2.0530151 | 2.5653229  |
| H | 2.2625211  | -1.6022217 | 2.6138637  |
| H | 1.0612732  | -2.3821707 | 1.5349120  |
| H | 1.2377008  | -2.9273881 | 3.2347601  |
| C | 3.5992326  | 3.1311934  | 0.2972807  |
| H | 4.5748266  | 3.5914498  | 0.5292725  |
| H | 2.8148364  | 3.7060416  | 0.8045179  |
| H | 3.4339684  | 3.1778232  | -0.7862142 |
| C | 2.8633599  | -1.5771214 | -1.5046853 |
| N | 3.4883853  | -2.7850570 | -1.4279882 |
| C | 3.7865935  | -3.4286877 | -0.1530641 |
| H | 3.2406063  | -2.9369793 | 0.6585507  |
| H | 4.8653859  | -3.4126383 | 0.0750695  |
| H | 3.4614674  | -4.4807031 | -0.1986475 |
| C | 3.9493526  | -3.5086825 | -2.6116767 |
| H | 3.9175827  | -2.8574734 | -3.4929742 |
| H | 3.3477836  | -4.4122053 | -2.8055991 |
| H | 4.9938237  | -3.8206705 | -2.4496688 |
| N | 2.0397075  | -1.3526374 | -2.5562175 |
| C | 1.2236135  | -2.4078417 | -3.1494333 |
| H | 1.2208863  | -3.2965283 | -2.5078702 |
| H | 1.5764515  | -2.6876860 | -4.1555965 |
| H | 0.1872610  | -2.0468242 | -3.2438254 |
| C | 1.8260769  | -0.0183660 | -3.1010316 |
| H | 2.6391262  | 0.6501714  | -2.7951542 |
| H | 0.8672850  | 0.4094242  | -2.7679484 |
| H | 1.8143390  | -0.0799942 | -4.2005884 |
| C | 0.3780795  | 3.2451752  | -0.9571034 |
| C | -0.1917087 | 4.4856970  | -1.4432812 |
| H | -0.0296791 | 4.5646223  | -2.5287729 |
| H | -1.2714484 | 4.5064420  | -1.2346448 |
| H | 0.2972352  | 5.3339114  | -0.9398759 |
| C | -2.8023174 | 2.6325434  | -3.1562124 |
| C | -3.6818488 | 3.2709516  | -2.2704468 |
| C | -2.1936690 | 1.4338094  | -2.7839675 |

|    |            |            |            |                                                                                             |
|----|------------|------------|------------|---------------------------------------------------------------------------------------------|
| C  | -3.9443018 | 2.7025960  | -1.0188239 |                                                                                             |
| C  | -2.4531597 | 0.8492621  | -1.5271588 |                                                                                             |
| C  | -3.3395920 | 1.4984245  | -0.6349051 |                                                                                             |
| C  | -1.8610460 | -0.4519996 | -1.1443267 |                                                                                             |
| C  | -3.6170079 | 0.8654594  | 0.7103232  |                                                                                             |
| C  | -3.5566908 | -0.6461759 | 0.6816786  |                                                                                             |
| C  | -2.6638706 | -1.2787640 | -0.2159477 |                                                                                             |
| C  | -4.3483740 | -1.4294308 | 1.5308779  |                                                                                             |
| C  | -2.5701814 | -2.6853605 | -0.2177855 |                                                                                             |
| C  | -4.2539383 | -2.8255856 | 1.5141271  |                                                                                             |
| C  | -3.3578136 | -3.4548597 | 0.6388714  |                                                                                             |
| H  | -2.6013685 | 3.0652236  | -4.1398148 |                                                                                             |
| H  | -4.1694563 | 4.2061480  | -2.5582381 |                                                                                             |
| H  | -1.5249150 | 0.9244131  | -3.4838186 |                                                                                             |
| H  | -4.6405057 | 3.1957226  | -0.3339001 |                                                                                             |
| H  | -5.0509098 | -0.9407913 | 2.2127026  |                                                                                             |
| H  | -1.8802939 | -3.1742528 | -0.9115492 |                                                                                             |
| H  | -4.8819590 | -3.4227659 | 2.1806189  |                                                                                             |
| H  | -3.2815780 | -4.5452737 | 0.6200650  |                                                                                             |
| H  | -2.8552398 | 1.2302290  | 1.4313315  |                                                                                             |
| H  | -4.5834002 | 1.2094483  | 1.1094233  |                                                                                             |
| H  | -1.4757580 | -1.0203013 | -2.0021018 |                                                                                             |
| H  | -0.7099134 | -0.2839663 | -0.5366111 |                                                                                             |
| Fe | 1.6771061  | 0.6351167  | 0.3850702  | <b>[Fe<sup>IV</sup>(O)TMG<sub>2</sub>dien(MeCN)]<sup>2+</sup>-DHA-IC (<math>\pi</math>)</b> |
| N  | 0.4347516  | 2.2576450  | -0.1576925 | <b>E<sub>B3LYP/def2-SVP(Fe:def2-TZVP)/COSMO(<math>\epsilon</math> = 35.88):</sub></b>       |
| O  | 0.4961989  | -0.5492498 | -0.2868702 | <b>-2985.7154660033 (&lt;S<sup>2</sup>&gt; 6.08206800)</b>                                  |
| N  | 1.2287536  | 0.3861479  | 2.3236306  | <b>E<sub>B3LYP/def2-TZVPP/COSMO(<math>\epsilon</math> = 35.88):</sub></b>                   |
| C  | 1.9243524  | 1.3789647  | 3.1548402  | <b>-2987.6096878526 (&lt;S<sup>2</sup>&gt; 6.08160453)</b>                                  |
| H  | 1.9980270  | 1.0393792  | 4.2004680  | <b>ZPE<sub>B3LYP/def2-SVP(Fe:def2-TZVP)/COSMO(<math>\epsilon</math> = 35.88):</sub></b>     |
| H  | 1.4085157  | 2.3542257  | 3.1742601  | <b>0.789187</b>                                                                             |
| C  | 3.3182449  | 1.5392904  | 2.5727786  | <b>Chem. Pot.<sub>(298.15)/B3LYP/def2-SVP(Fe:def2-</sub></b>                                |
| H  | 3.8996027  | 2.3082989  | 3.1081007  | <b>TZVP)/COSMO(<math>\epsilon</math> = 35.88):</b>                                          |
| H  | 3.8583257  | 0.5858650  | 2.6550017  | <b>0.719821</b>                                                                             |
| N  | 3.2184591  | 1.9020440  | 1.1244039  |                                                                                             |
| C  | 4.4717343  | 1.5507504  | 0.3871099  |                                                                                             |
| H  | 5.3531104  | 1.7928695  | 1.0040501  |                                                                                             |
| H  | 4.5085368  | 2.1739229  | -0.5172232 |                                                                                             |
| C  | 4.4379199  | 0.0891715  | -0.0150889 |                                                                                             |
| H  | 5.2742633  | -0.1256786 | -0.6984935 |                                                                                             |
| H  | 4.5741636  | -0.5584988 | 0.8682902  |                                                                                             |
| N  | 3.1404936  | -0.1327787 | -0.6697645 |                                                                                             |
| C  | 0.3123398  | -0.4149394 | 2.8963591  |                                                                                             |
| N  | -0.5097513 | 0.0438400  | 3.8818806  |                                                                                             |
| C  | -1.0067071 | 1.4154972  | 3.8962315  |                                                                                             |
| H  | -0.8517283 | 1.8864712  | 2.9180829  |                                                                                             |
| H  | -0.5162771 | 2.0266516  | 4.6724106  |                                                                                             |
| H  | -2.0883790 | 1.4020574  | 4.1065262  |                                                                                             |

|   |            |            |            |
|---|------------|------------|------------|
| C | -0.9238426 | -0.7833638 | 5.0139302  |
| H | -0.3226152 | -1.6991777 | 5.0552218  |
| H | -1.9919613 | -1.0523911 | 4.9620204  |
| H | -0.7579056 | -0.2173241 | 5.9447658  |
| N | 0.2031801  | -1.7117729 | 2.5275349  |
| C | -1.0761717 | -2.4149811 | 2.4975492  |
| H | -1.9042559 | -1.7154096 | 2.6588507  |
| H | -1.1253926 | -3.2122970 | 3.2571961  |
| H | -1.2053078 | -2.8740226 | 1.5048743  |
| C | 1.3318645  | -2.4719442 | 2.0040538  |
| H | 2.2703095  | -1.9569938 | 2.2406126  |
| H | 1.2470270  | -2.5950479 | 0.9139113  |
| H | 1.3426901  | -3.4648774 | 2.4816826  |
| C | 2.9716102  | 3.3593495  | 0.9904292  |
| H | 3.8453247  | 3.9187795  | 1.3640310  |
| H | 2.0902437  | 3.6560959  | 1.5709174  |
| H | 2.8091609  | 3.6153135  | -0.0637138 |
| C | 3.0551114  | -0.9648613 | -1.7220810 |
| N | 3.8595316  | -2.0580801 | -1.8346123 |
| C | 4.2814026  | -2.8400572 | -0.6772969 |
| H | 3.6849195  | -2.5743731 | 0.2019414  |
| H | 5.3498601  | -2.6928921 | -0.4473386 |
| H | 4.1211094  | -3.9092638 | -0.8907132 |
| C | 4.3818067  | -2.5193249 | -3.1196601 |
| H | 4.2227011  | -1.7560827 | -3.8904515 |
| H | 3.9125306  | -3.4636012 | -3.4423595 |
| H | 5.4655413  | -2.6922234 | -3.0190264 |
| N | 2.1911407  | -0.7073744 | -2.7314246 |
| C | 1.4875020  | -1.7714365 | -3.4402837 |
| H | 1.6859641  | -2.7423133 | -2.9731808 |
| H | 1.7729026  | -1.8136746 | -4.5041123 |
| H | 0.4037331  | -1.5794221 | -3.3799925 |
| C | 1.7422202  | 0.6403596  | -3.0484183 |
| H | 2.4282528  | 1.3804828  | -2.6203079 |
| H | 0.7256764  | 0.8241065  | -2.6655848 |
| H | 1.7298838  | 0.7633988  | -4.1431267 |
| C | -0.2932265 | 3.1045777  | -0.4589390 |
| C | -1.1955389 | 4.1743924  | -0.8333285 |
| H | -0.6401750 | 4.9384674  | -1.3989086 |
| H | -2.0081428 | 3.7766037  | -1.4610052 |
| H | -1.6208684 | 4.6319144  | 0.0730864  |
| C | -3.2110676 | 2.4489784  | -3.6868318 |
| C | -4.2230598 | 3.0441323  | -2.9132661 |
| C | -2.7626906 | 1.1707018  | -3.3743393 |
| C | -4.7684024 | 2.3481300  | -1.8264321 |
| C | -3.3129057 | 0.4460030  | -2.2811695 |
| C | -4.3308179 | 1.0624284  | -1.4922405 |
| C | -2.8941160 | -0.8888647 | -1.9899376 |

|   |            |            |            |
|---|------------|------------|------------|
| C | -4.9078064 | 0.3434600  | -0.2923814 |
| C | -4.5369464 | -1.1171941 | -0.1550781 |
| C | -3.5205928 | -1.6840793 | -0.9813865 |
| C | -5.1659428 | -1.9212785 | 0.8010574  |
| C | -3.1758345 | -3.0517339 | -0.8011538 |
| C | -4.8163642 | -3.2675366 | 0.9633880  |
| C | -3.8146398 | -3.8318448 | 0.1553047  |
| H | -2.7817496 | 2.9870015  | -4.5362946 |
| H | -4.5860652 | 4.0456392  | -3.1583243 |
| H | -1.9866805 | 0.6977787  | -3.9832368 |
| H | -5.5542386 | 2.8169487  | -1.2259830 |
| H | -5.9479523 | -1.4872944 | 1.4320574  |
| H | -2.4002930 | -3.4877837 | -1.4374821 |
| H | -5.3247975 | -3.8767924 | 1.7152576  |
| H | -3.5399270 | -4.8832093 | 0.2763503  |
| H | -4.5826973 | 0.8763267  | 0.6246626  |
| H | -6.0070823 | 0.4494549  | -0.2897079 |
| H | -2.1185435 | -1.3445435 | -2.6114763 |
| H | -0.4141488 | -0.2156491 | -0.2474446 |

### [Fe<sup>IV</sup>(O)TMG<sub>3</sub>tren]<sup>2+</sup> ( $\sigma$ ) pathway

|    |           |           |            |                                                                                                                                                                                                                                                                                                                                                                                                                                                                                                                                                                                                                                                                                                        |
|----|-----------|-----------|------------|--------------------------------------------------------------------------------------------------------------------------------------------------------------------------------------------------------------------------------------------------------------------------------------------------------------------------------------------------------------------------------------------------------------------------------------------------------------------------------------------------------------------------------------------------------------------------------------------------------------------------------------------------------------------------------------------------------|
| Fe | 2.5117018 | 4.4181172 | 6.3729970  | <p style="text-align: center;"><b>[Fe<sup>IV</sup>(O)TMG<sub>3</sub>tren]<sup>2+</sup></b></p> <p><b>E</b><sub>B3LYP/def2-SVP(Fe:def2-TZVP)/COSMO(<math>\epsilon</math> = 35.88):</sub></p> <p><b>-2713.2952880582 (&lt;S<sup>2</sup>&gt; 6.05191598)</b></p> <p><b>E</b><sub>B3LYP/def2-TZVPP/COSMO(<math>\epsilon</math> = 35.88):</sub></p> <p><b>-2714.8951214215 (&lt;S<sup>2</sup>&gt; 6.05445028)</b></p> <p><b>ZPE</b><sub>B3LYP/def2-SVP(Fe:def2-TZVP)/COSMO(<math>\epsilon</math> = 35.88):</sub></p> <p><b>0.724368</b></p> <p><b>Chem. Pot.</b><sub>(298.15)/B3LYP/def2-SVP(Fe:def2-TZVP)/COSMO(<math>\epsilon</math> = 35.88):</sub></p> <p><b>0.662954 (<math>\sigma</math> = 3)</b></p> |
| O  | 3.7856860 | 4.4762431 | 5.3634522  |                                                                                                                                                                                                                                                                                                                                                                                                                                                                                                                                                                                                                                                                                                        |
| N  | 0.8376096 | 4.3408896 | 7.6998255  |                                                                                                                                                                                                                                                                                                                                                                                                                                                                                                                                                                                                                                                                                                        |
| N  | 3.3996394 | 3.3598908 | 7.8688171  |                                                                                                                                                                                                                                                                                                                                                                                                                                                                                                                                                                                                                                                                                                        |
| N  | 1.2267776 | 3.4411268 | 5.1319592  |                                                                                                                                                                                                                                                                                                                                                                                                                                                                                                                                                                                                                                                                                                        |
| N  | 2.2705373 | 6.4247226 | 6.6231261  |                                                                                                                                                                                                                                                                                                                                                                                                                                                                                                                                                                                                                                                                                                        |
| N  | 5.4174789 | 2.8833960 | 9.0175080  |                                                                                                                                                                                                                                                                                                                                                                                                                                                                                                                                                                                                                                                                                                        |
| N  | 5.1485192 | 2.2104059 | 6.8108823  |                                                                                                                                                                                                                                                                                                                                                                                                                                                                                                                                                                                                                                                                                                        |
| N  | 0.9952763 | 1.8631068 | 3.3784508  |                                                                                                                                                                                                                                                                                                                                                                                                                                                                                                                                                                                                                                                                                                        |
| N  | 2.0330505 | 3.9020819 | 2.9786947  |                                                                                                                                                                                                                                                                                                                                                                                                                                                                                                                                                                                                                                                                                                        |
| N  | 2.4798754 | 8.5734282 | 5.6443585  |                                                                                                                                                                                                                                                                                                                                                                                                                                                                                                                                                                                                                                                                                                        |
| N  | 4.3785529 | 7.3302291 | 6.1379706  |                                                                                                                                                                                                                                                                                                                                                                                                                                                                                                                                                                                                                                                                                                        |
| C  | 1.1423972 | 3.3106159 | 8.7316161  |                                                                                                                                                                                                                                                                                                                                                                                                                                                                                                                                                                                                                                                                                                        |
| H  | 0.9251675 | 2.3225646 | 8.3044188  |                                                                                                                                                                                                                                                                                                                                                                                                                                                                                                                                                                                                                                                                                                        |
| H  | 0.4897329 | 3.4491437 | 9.6102170  |                                                                                                                                                                                                                                                                                                                                                                                                                                                                                                                                                                                                                                                                                                        |
| C  | 2.6116462 | 3.3851722 | 9.1106972  |                                                                                                                                                                                                                                                                                                                                                                                                                                                                                                                                                                                                                                                                                                        |
| H  | 2.7967175 | 4.2964612 | 9.7039923  |                                                                                                                                                                                                                                                                                                                                                                                                                                                                                                                                                                                                                                                                                                        |
| H  | 2.8670056 | 2.5319683 | 9.7595431  |                                                                                                                                                                                                                                                                                                                                                                                                                                                                                                                                                                                                                                                                                                        |
| C  | 4.6376789 | 2.8424106 | 7.8973964  |                                                                                                                                                                                                                                                                                                                                                                                                                                                                                                                                                                                                                                                                                                        |
| C  | 5.4208518 | 4.0104015 | 9.9430001  |                                                                                                                                                                                                                                                                                                                                                                                                                                                                                                                                                                                                                                                                                                        |
| H  | 4.9126374 | 4.8732837 | 9.5013807  |                                                                                                                                                                                                                                                                                                                                                                                                                                                                                                                                                                                                                                                                                                        |
| H  | 6.4641388 | 4.2980861 | 10.1521015 |                                                                                                                                                                                                                                                                                                                                                                                                                                                                                                                                                                                                                                                                                                        |
| H  | 4.9369490 | 3.7591235 | 10.9017205 |                                                                                                                                                                                                                                                                                                                                                                                                                                                                                                                                                                                                                                                                                                        |
| C  | 6.3101908 | 1.7854999 | 9.3845520  |                                                                                                                                                                                                                                                                                                                                                                                                                                                                                                                                                                                                                                                                                                        |
| H  | 6.0824739 | 0.8938410 | 8.7888343  |                                                                                                                                                                                                                                                                                                                                                                                                                                                                                                                                                                                                                                                                                                        |
| H  | 6.1528416 | 1.5424603 | 10.4479815 |                                                                                                                                                                                                                                                                                                                                                                                                                                                                                                                                                                                                                                                                                                        |



|   |            |            |           |
|---|------------|------------|-----------|
| H | 7.3719928  | 2.0508657  | 9.2479043 |
| C | 6.5567653  | 2.3080172  | 6.4409240 |
| H | 7.0676207  | 3.0515976  | 7.0636676 |
| H | 6.6254732  | 2.6328240  | 5.3897081 |
| H | 7.0759950  | 1.3397344  | 6.5369533 |
| C | 4.3135149  | 1.4780553  | 5.8713301 |
| H | 3.3297970  | 1.2983867  | 6.3186245 |
| H | 4.7878904  | 0.5069090  | 5.6539949 |
| H | 4.1878340  | 2.0326703  | 4.9288125 |
| C | -0.3521384 | 3.9684707  | 6.8844570 |
| H | -0.7187983 | 4.8722496  | 6.3797558 |
| H | -1.1590108 | 3.5967615  | 7.5386210 |
| C | 0.0437652  | 2.9343300  | 5.8443610 |
| H | 0.2361069  | 1.9663456  | 6.3370342 |
| H | -0.7967795 | 2.7710231  | 5.1508370 |
| C | 1.4263722  | 3.0663725  | 3.8587730 |
| C | 1.0037607  | 0.6405771  | 4.1734577 |
| H | 1.5989065  | 0.7757663  | 5.0819734 |
| H | 1.4626824  | -0.1678199 | 3.5811430 |
| H | -0.0145861 | 0.3230238  | 4.4537663 |
| C | 0.4771906  | 1.7081148  | 2.0202830 |
| H | 0.2805254  | 2.6895566  | 1.5732014 |
| H | -0.4723128 | 1.1503717  | 2.0656892 |
| H | 1.1722573  | 1.1478542  | 1.3725966 |
| C | 2.9393355  | 3.4199663  | 1.9415056 |
| H | 3.1499834  | 2.3531355  | 2.0799694 |
| H | 3.8905704  | 3.9719617  | 2.0172354 |
| H | 2.5290100  | 3.5777809  | 0.9300222 |
| C | 1.9137422  | 5.3490736  | 3.0693708 |
| H | 1.0839365  | 5.6069155  | 3.7363984 |
| H | 1.7020214  | 5.7533973  | 2.0658337 |
| H | 2.8404039  | 5.8055183  | 3.4497662 |
| C | 0.6907691  | 5.6958125  | 8.3010630 |
| H | 1.4134335  | 5.7867004  | 9.1229356 |
| H | -0.3202555 | 5.8145506  | 8.7263904 |
| C | 0.9825757  | 6.7553263  | 7.2521285 |
| H | 0.1578596  | 6.7910685  | 6.5205881 |
| H | 1.0187317  | 7.7465862  | 7.7319752 |
| C | 3.0246795  | 7.4192830  | 6.1297594 |
| C | 1.2191301  | 8.6111872  | 4.9123612 |
| H | 0.9138067  | 7.6021915  | 4.6181122 |
| H | 1.3556939  | 9.2080583  | 3.9958211 |
| H | 0.4115332  | 9.0737455  | 5.5041945 |
| C | 3.1193622  | 9.8745508  | 5.8320633 |
| H | 3.9183922  | 9.8021671  | 6.5791324 |
| H | 2.3648980  | 10.5896344 | 6.1983178 |
| H | 3.5377685  | 10.2706565 | 4.8915706 |
| C | 5.2027113  | 7.8602057  | 5.0565735 |

|    |            |            |            |                                                                                          |
|----|------------|------------|------------|------------------------------------------------------------------------------------------|
| H  | 4.5751923  | 8.1883973  | 4.2197910  |                                                                                          |
| H  | 5.8696939  | 7.0606306  | 4.6945270  |                                                                                          |
| H  | 5.8276762  | 8.7051161  | 5.3911093  |                                                                                          |
| C  | 5.1053028  | 6.6048807  | 7.1685091  |                                                                                          |
| H  | 4.4415098  | 6.4134100  | 8.0186636  |                                                                                          |
| H  | 5.9516809  | 7.2229685  | 7.5105399  |                                                                                          |
| H  | 5.4931964  | 5.6474729  | 6.7881964  |                                                                                          |
| Fe | -0.9688324 | -0.0315295 | 0.8179396  | <b>[Fe<sup>IV</sup>(O)TMG<sub>3</sub>tren]<sup>2+</sup>-CHD-RC (<math>\sigma</math>)</b> |
| O  | 0.1979603  | -0.1264185 | -0.3125066 | <b>E<sub>B3LYP/def2-SVP(Fe:def2-TZVP)/COSMO(<math>\epsilon</math> = 35.88):</sub></b>    |
| N  | -2.5090601 | 0.0904373  | 2.3006792  | <b>-2946.3902236849 (&lt;S<sup>2</sup>&gt; 6.05271281)</b>                               |
| N  | 0.1677664  | 0.7266144  | 2.3335927  | <b>E<sub>B3LYP/def2-TZVPP/COSMO(<math>\epsilon</math> = 35.88):</sub></b>                |
| N  | -1.4577365 | -2.0087079 | 0.8721029  | <b>-2948.2464037180 (&lt;S<sup>2</sup>&gt; 6.05539672)</b>                               |
| N  | -2.2042811 | 1.2473725  | -0.1749975 | <b>ZPE<sub>B3LYP/def2-SVP(Fe:def2-TZVP)/COSMO(<math>\epsilon</math> = 35.88):</sub></b>  |
| N  | 2.0178712  | 2.0722175  | 2.9544539  | <b>0.847527</b>                                                                          |
| N  | 2.3610514  | 0.0829862  | 1.8061970  | <b>Chem. Pot.<sub>(298.15)/B3LYP/def2-SVP(Fe:def2-</sub></b>                             |
| N  | -0.7088069 | -4.2430079 | 0.6245967  | <b>TZVP)/COSMO(<math>\epsilon</math> = 35.88):</b>                                       |
| N  | -0.8160128 | -2.8407245 | -1.2244556 | <b>0.777683</b>                                                                          |
| N  | -2.9912216 | 2.0141562  | -2.2749183 |                                                                                          |
| N  | -0.7924028 | 2.4126069  | -1.6407206 |                                                                                          |
| C  | -1.8393787 | 0.3025512  | 3.6138021  |                                                                                          |
| H  | -1.4843444 | -0.6701724 | 3.9793988  |                                                                                          |
| H  | -2.5620636 | 0.6956894  | 4.3488512  |                                                                                          |
| C  | -0.6565519 | 1.2387486  | 3.4393641  |                                                                                          |
| H  | -1.0182766 | 2.2632619  | 3.2489878  |                                                                                          |
| H  | -0.0801704 | 1.2794589  | 4.3774452  |                                                                                          |
| C  | 1.4879574  | 0.9665204  | 2.3520084  |                                                                                          |
| C  | 1.3701456  | 3.3785495  | 2.9326698  |                                                                                          |
| H  | 0.5560182  | 3.3934758  | 2.2015221  |                                                                                          |
| H  | 2.1101245  | 4.1396776  | 2.6356266  |                                                                                          |
| H  | 0.9706759  | 3.6582562  | 3.9219434  |                                                                                          |
| C  | 3.2828674  | 2.0278392  | 3.6857751  |                                                                                          |
| H  | 3.5874807  | 0.9889655  | 3.8581658  |                                                                                          |
| H  | 3.1427120  | 2.5154465  | 4.6642570  |                                                                                          |
| H  | 4.0895875  | 2.5578324  | 3.1520839  |                                                                                          |
| C  | 3.5763631  | 0.5100734  | 1.1203772  |                                                                                          |
| H  | 3.5829546  | 1.5987811  | 0.9929754  |                                                                                          |
| H  | 3.6059060  | 0.0482772  | 0.1199471  |                                                                                          |
| H  | 4.4853580  | 0.2062995  | 1.6662775  |                                                                                          |
| C  | 2.1067532  | -1.3490846 | 1.7791468  |                                                                                          |
| H  | 1.2980445  | -1.5904612 | 2.4776368  |                                                                                          |
| H  | 3.0195483  | -1.8800830 | 2.0956580  |                                                                                          |
| H  | 1.8255067  | -1.6887172 | 0.7705991  |                                                                                          |
| C  | -3.2552868 | -1.1979205 | 2.2679394  |                                                                                          |
| H  | -3.9729782 | -1.1586912 | 1.4376214  |                                                                                          |
| H  | -3.8271907 | -1.3287637 | 3.2022837  |                                                                                          |
| C  | -2.2841616 | -2.3435534 | 2.0423354  |                                                                                          |
| H  | -1.6773847 | -2.5023696 | 2.9497393  |                                                                                          |

|   |            |            |            |
|---|------------|------------|------------|
| H | -2.8481741 | -3.2751820 | 1.8755669  |
| C | -0.9875951 | -3.0090514 | 0.1104845  |
| C | -0.1472087 | -4.4391105 | 1.9560690  |
| H | 0.2195209  | -3.4913853 | 2.3627140  |
| H | 0.7053633  | -5.1342026 | 1.8857686  |
| H | -0.8829849 | -4.8703766 | 2.6554138  |
| C | -0.9719632 | -5.4743063 | -0.1182954 |
| H | -1.6017385 | -5.2658955 | -0.9910685 |
| H | -1.5114843 | -6.1752240 | 0.5392657  |
| H | -0.0419861 | -5.9648611 | -0.4513385 |
| C | 0.2771045  | -3.4700628 | -1.9576021 |
| H | 0.9886463  | -3.9338657 | -1.2646355 |
| H | 0.8091706  | -2.6955810 | -2.5332431 |
| H | -0.0862102 | -4.2337551 | -2.6653280 |
| C | -1.6521393 | -1.9464017 | -2.0106126 |
| H | -2.5497245 | -1.6874257 | -1.4385123 |
| H | -1.9566165 | -2.4632209 | -2.9354232 |
| H | -1.1138243 | -1.0240280 | -2.2772725 |
| C | -3.3818887 | 1.2406589  | 1.9352927  |
| H | -2.8996202 | 2.1630592  | 2.2853307  |
| H | -4.3560653 | 1.1547122  | 2.4459526  |
| C | -3.5459203 | 1.2982020  | 0.4262008  |
| H | -4.1854725 | 0.4650457  | 0.0888042  |
| H | -4.0695112 | 2.2272237  | 0.1494218  |
| C | -1.9988470 | 1.8651705  | -1.3487660 |
| C | -4.0108518 | 0.9999990  | -2.5167645 |
| H | -3.7350016 | 0.0545775  | -2.0394525 |
| H | -4.0906910 | 0.8248450  | -3.6020879 |
| H | -5.0015195 | 1.3140718  | -2.1474913 |
| C | -3.1201302 | 3.2204336  | -3.0906665 |
| H | -2.4822078 | 4.0189041  | -2.6940956 |
| H | -4.1673158 | 3.5620716  | -3.0530595 |
| H | -2.8577490 | 3.0375783  | -4.1461947 |
| C | -0.2389881 | 2.4113261  | -2.9907594 |
| H | -0.8422923 | 1.7796406  | -3.6532011 |
| H | 0.7827787  | 1.9991389  | -2.9559427 |
| H | -0.1834022 | 3.4278008  | -3.4150769 |
| C | 0.0848982  | 2.9564519  | -0.6155811 |
| H | -0.4811571 | 3.1013581  | 0.3109159  |
| H | 0.4680324  | 3.9328578  | -0.9546816 |
| H | 0.9361637  | 2.2867117  | -0.4192507 |
| C | 5.4637405  | -0.0058737 | -2.7034625 |
| C | 5.4418424  | 1.2213368  | -3.5766161 |
| C | 4.1636154  | 1.3634327  | -4.3609893 |
| C | 3.1392140  | 0.5044747  | -4.2673160 |
| C | 3.1438013  | -0.6993783 | -3.3610423 |
| C | 4.4393903  | -0.8650254 | -2.6097235 |
| H | 6.3772537  | -0.1875285 | -2.1256271 |

|    |            |            |            |                                                                                                 |
|----|------------|------------|------------|-------------------------------------------------------------------------------------------------|
| H  | 4.0914666  | 2.2200706  | -5.0410385 |                                                                                                 |
| H  | 2.2412326  | 0.6653797  | -4.8747854 |                                                                                                 |
| H  | 4.5273129  | -1.7419187 | -1.9579273 |                                                                                                 |
| H  | 2.9265057  | -1.6147206 | -3.9475355 |                                                                                                 |
| H  | 2.3010827  | -0.6307012 | -2.6427220 |                                                                                                 |
| H  | 5.6101139  | 2.1275351  | -2.9597196 |                                                                                                 |
| H  | 6.3087785  | 1.2081139  | -4.2676670 |                                                                                                 |
| Fe | 2.6250481  | 4.3115403  | 6.3260195  | <b><i>[Fe<sup>IV</sup>(O)TMG<sub>3</sub>tren]<sup>2+</sup>-CHD-TS (<math>\sigma</math>)</i></b> |
| O  | 3.9939871  | 4.1845170  | 5.3146118  | <b>E<sub>B3LYP/def2-SVP(Fe:def2-TZVP)/COSMO(<math>\epsilon</math> = 35.88):</sub></b>           |
| N  | 0.7846524  | 4.4270370  | 7.7131244  | <b>-2946.3671746049 (&lt;S<sup>2</sup>&gt; 6.52206113)</b>                                      |
| N  | 3.3365789  | 3.3425791  | 8.0261986  | <b>E<sub>B3LYP/def2-TZVPP/COSMO(<math>\epsilon</math> = 35.88):</sub></b>                       |
| N  | 1.1981471  | 3.3070016  | 5.1778735  | <b>-2948.2217801537 (&lt;S<sup>2</sup>&gt; 6.51430048)</b>                                      |
| N  | 2.3655618  | 6.3850560  | 6.4641382  | <b>ZPE<sub>B3LYP/def2-SVP(Fe:def2-TZVP)/COSMO(<math>\epsilon</math> = 35.88):</sub></b>         |
| N  | 5.2166375  | 2.6803943  | 9.3108912  | <b>0.840466</b>                                                                                 |
| N  | 4.8511197  | 1.7497729  | 7.2141463  | <b>Chem. Pot.<sub>(298.15)/B3LYP/def2-SVP(Fe:def2-</sub></b>                                    |
| N  | 0.7135970  | 1.7614003  | 3.4449074  | <b>TZVP)/COSMO(<math>\epsilon</math> = 35.88):</b>                                              |
| N  | 1.7639613  | 3.7757298  | 2.9517124  | <b>0.770718</b>                                                                                 |
| N  | 2.6903610  | 8.5537968  | 5.5548459  |                                                                                                 |
| N  | 4.5179153  | 7.2845313  | 6.2191236  |                                                                                                 |
| C  | 1.0801394  | 3.5718230  | 8.8828083  |                                                                                                 |
| H  | 0.8365280  | 2.5313781  | 8.6258926  |                                                                                                 |
| H  | 0.4501796  | 3.8568720  | 9.7448608  |                                                                                                 |
| C  | 2.5575097  | 3.6617104  | 9.2311350  |                                                                                                 |
| H  | 2.7902623  | 4.6692035  | 9.6182558  |                                                                                                 |
| H  | 2.7793148  | 2.9547186  | 10.0458672 |                                                                                                 |
| C  | 4.4540047  | 2.6199437  | 8.1763494  |                                                                                                 |
| C  | 5.4211488  | 3.9146880  | 10.0583816 |                                                                                                 |
| H  | 5.0786140  | 4.7760750  | 9.4770437  |                                                                                                 |
| H  | 6.4981762  | 4.0412915  | 10.2575451 |                                                                                                 |
| H  | 4.8935624  | 3.9045804  | 11.0271800 |                                                                                                 |
| C  | 5.8521698  | 1.4986834  | 9.8892474  |                                                                                                 |
| H  | 5.4626538  | 0.5874647  | 9.4203674  |                                                                                                 |
| H  | 5.6173853  | 1.4603757  | 10.9657889 |                                                                                                 |
| H  | 6.9496523  | 1.5205144  | 9.7799267  |                                                                                                 |
| C  | 6.2568445  | 1.4804773  | 6.9322323  |                                                                                                 |
| H  | 6.8979616  | 2.2035500  | 7.4493512  |                                                                                                 |
| H  | 6.4217537  | 1.5833378  | 5.8493553  |                                                                                                 |
| H  | 6.5499729  | 0.4598146  | 7.2304016  |                                                                                                 |
| C  | 3.9063796  | 1.0955537  | 6.3223928  |                                                                                                 |
| H  | 2.8984928  | 1.1526985  | 6.7487766  |                                                                                                 |
| H  | 4.1874130  | 0.0348907  | 6.2188232  |                                                                                                 |
| H  | 3.9044157  | 1.5625394  | 5.3256536  |                                                                                                 |
| C  | -0.3656732 | 3.9265366  | 6.9299190  |                                                                                                 |
| H  | -0.7674108 | 4.7544185  | 6.3292157  |                                                                                                 |
| H  | -1.1740583 | 3.5811889  | 7.5995076  |                                                                                                 |
| C  | 0.0817348  | 2.8118374  | 5.9963716  |                                                                                                 |
| H  | 0.3675718  | 1.9228540  | 6.5857670  |                                                                                                 |

|   |            |            |           |
|---|------------|------------|-----------|
| H | -0.7694328 | 2.5093901  | 5.3666944 |
| C | 1.2378739  | 2.9458504  | 3.8897312 |
| C | 0.8007233  | 0.5248037  | 4.2112956 |
| H | 1.5030108  | 0.6373717  | 5.0428437 |
| H | 1.1716928  | -0.2804936 | 3.5557166 |
| H | -0.1796151 | 0.2149894  | 4.6113236 |
| C | -0.0281180 | 1.6565864  | 2.1902679 |
| H | -0.2532063 | 2.6537697  | 1.7941898 |
| H | -0.9829663 | 1.1403809  | 2.3841959 |
| H | 0.5222076  | 1.0801643  | 1.4274879 |
| C | 2.4238721  | 3.2869805  | 1.7462272 |
| H | 2.6268085  | 2.2128132  | 1.8271368 |
| H | 3.3815320  | 3.8169847  | 1.6227868 |
| H | 1.8207234  | 3.4696745  | 0.8411570 |
| C | 1.7654598  | 5.2211020  | 3.1113102 |
| H | 1.0274803  | 5.5049713  | 3.8694570 |
| H | 1.4882660  | 5.6884305  | 2.1526969 |
| H | 2.7561045  | 5.5936066  | 3.4160783 |
| C | 0.6338074  | 5.8492690  | 8.0877993 |
| H | 1.3045376  | 6.0613244  | 8.9320703 |
| H | -0.3978577 | 6.0580590  | 8.4245919 |
| C | 1.0136024  | 6.7436585  | 6.9188748 |
| H | 0.2683539  | 6.6369612  | 6.1112705 |
| H | 0.9715902  | 7.7943096  | 7.2455128 |
| C | 3.1709873  | 7.3791510  | 6.0715612 |
| C | 1.5414766  | 8.6178497  | 4.6606259 |
| H | 1.2636477  | 7.6171451  | 4.3176192 |
| H | 1.8061428  | 9.2208843  | 3.7760698 |
| H | 0.6665092  | 9.0854290  | 5.1431839 |
| C | 3.2748363  | 9.8493385  | 5.8936986 |
| H | 3.9741108  | 9.7464832  | 6.7317576 |
| H | 2.4669238  | 10.5338638 | 6.2012541 |
| H | 3.8010230  | 10.3059326 | 5.0382667 |
| C | 5.4498556  | 7.9114756  | 5.2885347 |
| H | 4.9238218  | 8.2573163  | 4.3913604 |
| H | 6.2028505  | 7.1698761  | 4.9808418 |
| H | 5.9822325  | 8.7625422  | 5.7452748 |
| C | 5.1298934  | 6.4967065  | 7.2780414 |
| H | 4.3885025  | 6.2999630  | 8.0607861 |
| H | 5.9635079  | 7.0699376  | 7.7151346 |
| H | 5.5133728  | 5.5368978  | 6.8988905 |
| C | 7.0476580  | 1.7878396  | 3.1059738 |
| C | 8.3349531  | 2.1938748  | 3.7601219 |
| C | 8.3251196  | 3.6020126  | 4.2759692 |
| C | 7.2495496  | 4.4102856  | 4.1769005 |
| C | 5.9649956  | 3.9730633  | 3.5883996 |
| C | 5.9803967  | 2.6087113  | 3.0158606 |
| H | 7.0011289  | 0.7852977  | 2.6678932 |

|    |            |            |            |                                                                                  |
|----|------------|------------|------------|----------------------------------------------------------------------------------|
| H  | 9.2500152  | 3.9793107  | 4.7246795  |                                                                                  |
| H  | 7.3199330  | 5.4379020  | 4.5456775  |                                                                                  |
| H  | 5.0793315  | 2.2592650  | 2.5037111  |                                                                                  |
| H  | 5.5128860  | 4.7265823  | 2.9183513  |                                                                                  |
| H  | 5.0804316  | 4.0241957  | 4.4579639  |                                                                                  |
| H  | 8.5881707  | 1.4879165  | 4.5793250  |                                                                                  |
| H  | 9.1768115  | 2.0593133  | 3.0494990  |                                                                                  |
| Fe | -0.8533561 | 0.0043579  | 0.5570301  | <b><math>[Fe^{IV}(O)TMG_3tren]^{2+}</math>-CHD-IC (<math>\sigma</math>)</b>      |
| O  | 0.3516320  | -0.0341391 | -0.8223623 | <b><math>E_{B3LYP/def2-SVP(Fe: def2-TZVP)/COSMO(\epsilon = 35.88)}</math>:</b>   |
| N  | -2.3963177 | 0.0724741  | 2.3000065  | <b>-2946.4108672118 (&lt;S<sup>2</sup>&gt; 7.04650544)</b>                       |
| N  | 0.2868408  | 0.8611248  | 2.0913675  | <b><math>E_{B3LYP/def2-TZVPP/COSMO(\epsilon = 35.88)}</math>:</b>                |
| N  | -1.3019818 | -2.0149712 | 0.7813779  | <b>-2948.2674955056 (&lt;S<sup>2</sup>&gt; 7.04388757)</b>                       |
| N  | -2.3492210 | 1.1914381  | -0.2635538 | <b><math>ZPE_{B3LYP/def2-SVP(Fe: def2-TZVP)/COSMO(\epsilon = 35.88)}</math>:</b> |
| N  | 2.1390036  | 2.2301026  | 2.6594882  | <b>0.842558</b>                                                                  |
| N  | 2.4754389  | 0.1894000  | 1.5911382  | <b>Chem. Pot.<sub>(298.15)/B3LYP/def2-SVP(Fe: def2-</sub></b>                    |
| N  | -0.5457068 | -4.2454063 | 0.4728242  | <b>TZVP)/COSMO(<math>\epsilon = 35.88</math>):</b>                               |
| N  | -0.9064695 | -2.8709968 | -1.3636009 | <b>0.771514</b>                                                                  |
| N  | -3.3587665 | 1.9435761  | -2.2759030 |                                                                                  |
| N  | -1.1758174 | 2.5515829  | -1.7688422 |                                                                                  |
| C  | -1.6356943 | 0.4200705  | 3.5175969  |                                                                                  |
| H  | -1.1831663 | -0.4969935 | 3.9202931  |                                                                                  |
| H  | -2.3041664 | 0.8285183  | 4.2972025  |                                                                                  |
| C  | -0.5302753 | 1.4121032  | 3.1824944  |                                                                                  |
| H  | -0.9748726 | 2.3849119  | 2.9104635  |                                                                                  |
| H  | 0.0794956  | 1.5874327  | 4.0827190  |                                                                                  |
| C  | 1.6042443  | 1.1009102  | 2.1085876  |                                                                                  |
| C  | 1.4870728  | 3.5323182  | 2.5800376  |                                                                                  |
| H  | 0.6777674  | 3.5120977  | 1.8436941  |                                                                                  |
| H  | 2.2265793  | 4.2828061  | 2.2562806  |                                                                                  |
| H  | 1.0788959  | 3.8513027  | 3.5536259  |                                                                                  |
| C  | 3.3901265  | 2.2146058  | 3.4157633  |                                                                                  |
| H  | 3.6916573  | 1.1841914  | 3.6367775  |                                                                                  |
| H  | 3.2306138  | 2.7385684  | 4.3722842  |                                                                                  |
| H  | 4.2065581  | 2.7249833  | 2.8780499  |                                                                                  |
| C  | 3.7332529  | 0.5734497  | 0.9553631  |                                                                                  |
| H  | 3.7388103  | 1.6475298  | 0.7357358  |                                                                                  |
| H  | 3.8377576  | 0.0242927  | 0.0054450  |                                                                                  |
| H  | 4.6066958  | 0.3300153  | 1.5831629  |                                                                                  |
| C  | 2.2255410  | -1.2438321 | 1.6590340  |                                                                                  |
| H  | 1.3964993  | -1.4390934 | 2.3478005  |                                                                                  |
| H  | 3.1284207  | -1.7517403 | 2.0358225  |                                                                                  |
| H  | 1.9775905  | -1.6633463 | 0.6706675  |                                                                                  |
| C  | -2.9951554 | -1.2774234 | 2.3679606  |                                                                                  |
| H  | -3.7976562 | -1.3398793 | 1.6198459  |                                                                                  |
| H  | -3.4526847 | -1.4551422 | 3.3581382  |                                                                                  |
| C  | -1.9482552 | -2.3392763 | 2.0603934  |                                                                                  |
| H  | -1.2193189 | -2.3885519 | 2.8876896  |                                                                                  |

|   |            |            |            |
|---|------------|------------|------------|
| H | -2.4381532 | -3.3249780 | 2.0168036  |
| C | -0.9123488 | -3.0215135 | -0.0131345 |
| C | 0.1743310  | -4.4199673 | 1.7285068  |
| H | 0.5577247  | -3.4611787 | 2.0897907  |
| H | 1.0333265  | -5.0899190 | 1.5594807  |
| H | -0.4608825 | -4.8688610 | 2.5104729  |
| C | -0.8627531 | -5.4876816 | -0.2289012 |
| H | -1.5938988 | -5.3006240 | -1.0240281 |
| H | -1.3049756 | -6.1972614 | 0.4894518  |
| H | 0.0339987  | -5.9586316 | -0.6658296 |
| C | 0.1232616  | -3.4620615 | -2.2103238 |
| H | 0.9158083  | -3.9084998 | -1.5983185 |
| H | 0.5695704  | -2.6688815 | -2.8328192 |
| H | -0.2878561 | -4.2334548 | -2.8828399 |
| C | -1.8395133 | -1.9925953 | -2.0516809 |
| H | -2.6836227 | -1.7653334 | -1.3907519 |
| H | -2.2221528 | -2.5082316 | -2.9476047 |
| H | -1.3523061 | -1.0548611 | -2.3616950 |
| C | -3.3845723 | 1.1092628  | 1.9346534  |
| H | -2.9797676 | 2.0912733  | 2.2166694  |
| H | -4.3276404 | 0.9677800  | 2.4933112  |
| C | -3.6387101 | 1.0909403  | 0.4333184  |
| H | -4.1837272 | 0.1705904  | 0.1612691  |
| H | -4.2972075 | 1.9335797  | 0.1689893  |
| C | -2.2976559 | 1.8675884  | -1.4196755 |
| C | -4.2969506 | 0.8456963  | -2.4774120 |
| H | -3.9077500 | -0.0787517 | -2.0406284 |
| H | -4.4316936 | 0.6833799  | -3.5593316 |
| H | -5.2852167 | 1.0616285  | -2.0380446 |
| C | -3.6501697 | 3.1479290  | -3.0513111 |
| H | -3.0623611 | 3.9941081  | -2.6769222 |
| H | -4.7194053 | 3.3907884  | -2.9389862 |
| H | -3.4422148 | 3.0100457  | -4.1257378 |
| C | -0.6977887 | 2.6161514  | -3.1447429 |
| H | -1.2922704 | 1.9596388  | -3.7904071 |
| H | 0.3483867  | 2.2684307  | -3.1743377 |
| H | -0.7301642 | 3.6430673  | -3.5453789 |
| C | -0.2993521 | 3.1595069  | -0.7817446 |
| H | -0.8164565 | 3.2243410  | 0.1822357  |
| H | -0.0360100 | 4.1777803  | -1.1120779 |
| H | 0.6306754  | 2.5826840  | -0.6565031 |
| C | 5.2447370  | -1.1077620 | -2.5256498 |
| C | 5.9390780  | 0.2118695  | -2.7010181 |
| C | 5.0113592  | 1.3411945  | -3.0450300 |
| C | 3.6608557  | 1.1541976  | -3.1891437 |
| C | 3.0656787  | -0.1273517 | -3.0119166 |
| C | 3.8890080  | -1.2417362 | -2.6813876 |
| H | 5.8584828  | -1.9778487 | -2.2728047 |

|   |           |            |            |
|---|-----------|------------|------------|
| H | 5.4478266 | 2.3346927  | -3.1869590 |
| H | 3.0249714 | 2.0065390  | -3.4494474 |
| H | 3.4276405 | -2.2259643 | -2.5518215 |
| H | 1.9891493 | -0.2579209 | -3.1426825 |
| H | 1.3003122 | 0.1326979  | -0.8844993 |
| H | 6.5261616 | 0.4613575  | -1.7884693 |
| H | 6.7350458 | 0.1233474  | -3.4750242 |

|    |            |            |            |
|----|------------|------------|------------|
| Fe | -2.0382242 | -0.2003816 | 0.0104925  |
| O  | -0.4536177 | 0.1732540  | 0.0025980  |
| N  | -4.1234282 | -0.6929268 | 0.0178722  |
| N  | -2.2045879 | -0.6689593 | 1.9885224  |
| N  | -1.9678812 | -1.7213700 | -1.3433414 |
| N  | -2.7522734 | 1.6064611  | -0.6102194 |
| N  | -1.4414704 | -0.2872002 | 4.1992861  |
| N  | -0.0377152 | -1.2868058 | 2.6420230  |
| N  | -0.6972182 | -3.4833258 | -2.2895878 |
| N  | -0.0709300 | -1.2753378 | -2.6486084 |
| N  | -2.3616590 | 3.5680935  | -1.8822065 |
| N  | -1.0944838 | 3.1416733  | 0.0169804  |
| C  | -4.4058590 | -1.3935773 | 1.3012249  |
| H  | -4.1013708 | -2.4432370 | 1.1943303  |
| H  | -5.4885784 | -1.3762180 | 1.5121220  |
| C  | -3.6088589 | -0.7481101 | 2.4208418  |
| H  | -4.0292565 | 0.2448807  | 2.6530683  |
| H  | -3.7079590 | -1.3524148 | 3.3366299  |
| C  | -1.2427842 | -0.7303998 | 2.9227182  |
| C  | -2.2423259 | 0.8895582  | 4.5165076  |
| H  | -2.4532358 | 1.4677405  | 3.6115432  |
| H  | -1.6743342 | 1.5325709  | 5.2085751  |
| H  | -3.1952667 | 0.6218630  | 5.0029646  |
| C  | -0.8763981 | -0.9751314 | 5.3589535  |
| H  | -0.4955941 | -1.9614415 | 5.0692810  |
| H  | -1.6724599 | -1.1170313 | 6.1079101  |
| H  | -0.0635776 | -0.3966904 | 5.8291502  |
| C  | 1.2059064  | -0.7887195 | 3.2204154  |
| H  | 1.0331854  | 0.1565159  | 3.7475903  |
| H  | 1.9291368  | -0.6016411 | 2.4103999  |
| H  | 1.6548582  | -1.5137490 | 3.9195503  |
| C  | 0.1174077  | -2.3661880 | 1.6792803  |
| H  | -0.8623268 | -2.8034688 | 1.4582312  |
| H  | 0.7632283  | -3.1453546 | 2.1163880  |
| H  | 0.5710217  | -2.0073503 | 0.7424550  |
| C  | -4.3721963 | -1.5762164 | -1.1550989 |
| H  | -4.4708289 | -0.9437841 | -2.0474293 |
| H  | -5.3209265 | -2.1235244 | -1.0228993 |
| C  | -3.2003558 | -2.5250213 | -1.3358951 |
| H  | -3.2017773 | -3.2779446 | -0.5296844 |

***[Fe<sup>IV</sup>(O)TMG<sub>3</sub>tren]<sup>2+</sup>-DHA-RC (σ)***

**E<sub>B3LYP/def2-SVP(Fe:def2-TZVP)/COSMO(ε = 35.88):</sub>**

**-3253.2990426887 (<S<sup>2</sup>> 6.05301605)**

**E<sub>B3LYP/def2-TZVPP/COSMO(ε = 35.88):</sub>**

**-3255.4782627353 (<S<sup>2</sup>> 6.05554972)**

**ZPE<sub>B3LYP/def2-SVP(Fe:def2-TZVP)/COSMO(ε = 35.88):</sub>**

**0.943034**

**Chem. Pot.<sub>(298.15)/B3LYP/def2-SVP(Fe:def2-</sub>**

**TZVP)/COSMO(ε = 35.88):**

**0.869432**



|   |            |            |            |
|---|------------|------------|------------|
| H | -3.3187383 | -3.0778168 | -2.2814514 |
| C | -0.9232449 | -2.1552457 | -2.0664062 |
| C | -0.9628681 | -4.5123414 | -1.2909265 |
| H | -1.1345577 | -4.0608008 | -0.3088484 |
| H | -0.0835113 | -5.1725897 | -1.2151574 |
| H | -1.8342449 | -5.1330051 | -1.5590527 |
| C | -0.1881834 | -3.9833516 | -3.5656319 |
| H | -0.2412747 | -3.2000935 | -4.3307530 |
| H | -0.8173189 | -4.8281263 | -3.8900974 |
| H | 0.8516355  | -4.3421164 | -3.4857165 |
| C | 1.3568562  | -1.5434647 | -2.7863594 |
| H | 1.6369977  | -2.4342140 | -2.2121128 |
| H | 1.9219829  | -0.6844487 | -2.3905422 |
| H | 1.6500080  | -1.6888099 | -3.8394052 |
| C | -0.4980432 | 0.0398982  | -3.1003510 |
| H | -1.5915858 | 0.0706364  | -3.1556737 |
| H | -0.0863350 | 0.2235978  | -4.1062420 |
| H | -0.1482477 | 0.8314290  | -2.4200561 |
| C | -4.8794252 | 0.5859612  | -0.0873095 |
| H | -4.9284559 | 1.0398423  | 0.9114552  |
| H | -5.9128810 | 0.3890738  | -0.4194178 |
| C | -4.1585714 | 1.5284132  | -1.0351595 |
| H | -4.2606712 | 1.1648188  | -2.0715954 |
| H | -4.6382797 | 2.5196402  | -1.0018416 |
| C | -2.0741588 | 2.7425220  | -0.8332596 |
| C | -2.7771915 | 3.0764741  | -3.1908808 |
| H | -2.6030088 | 1.9990981  | -3.2712474 |
| H | -2.1782437 | 3.5787492  | -3.9679873 |
| H | -3.8414290 | 3.2850326  | -3.3913972 |
| C | -2.2909436 | 5.0240515  | -1.7686570 |
| H | -2.2081570 | 5.3209900  | -0.7166514 |
| H | -3.2181103 | 5.4557881  | -2.1793290 |
| H | -1.4400614 | 5.4430370  | -2.3315590 |
| C | 0.1114532  | 3.8194815  | -0.4450888 |
| H | 0.1605119  | 3.8148477  | -1.5401389 |
| H | 0.9915636  | 3.2801766  | -0.0582137 |
| H | 0.1630428  | 4.8610653  | -0.0867362 |
| C | -1.1255664 | 2.8374057  | 1.4392073  |
| H | -2.1351108 | 2.5213753  | 1.7236892  |
| H | -0.8651958 | 3.7469091  | 2.0049539  |
| H | -0.4116976 | 2.0395978  | 1.6956708  |
| C | 5.6064148  | -0.1890937 | 3.5335034  |
| C | 5.0622806  | 1.1002484  | 3.5511934  |
| C | 5.5049887  | -0.9703167 | 2.3777236  |
| C | 4.4199887  | 1.5988387  | 2.4130380  |
| C | 4.8551220  | -0.4801238 | 1.2355048  |
| C | 4.3062370  | 0.8175583  | 1.2536747  |
| C | 4.7158964  | -1.3112670 | -0.0239197 |

|    |           |            |            |                                                                                          |
|----|-----------|------------|------------|------------------------------------------------------------------------------------------|
| C  | 3.5970613 | 1.3242928  | 0.0138887  |                                                                                          |
| C  | 4.2376477 | 0.8244946  | -1.2654690 |                                                                                          |
| C  | 4.7889654 | -0.4722149 | -1.2835675 |                                                                                          |
| C  | 4.2851673 | 1.6107872  | -2.4260411 |                                                                                          |
| C  | 5.3763840 | -0.9555737 | -2.4618926 |                                                                                          |
| C  | 4.8647609 | 1.1187580  | -3.6002015 |                                                                                          |
| C  | 5.4123968 | -0.1689062 | -3.6181110 |                                                                                          |
| H  | 6.1166395 | -0.5837032 | 4.4165792  |                                                                                          |
| H  | 5.1445264 | 1.7206706  | 4.4479424  |                                                                                          |
| H  | 5.9386528 | -1.9749947 | 2.3598819  |                                                                                          |
| H  | 4.0030278 | 2.6106993  | 2.4235247  |                                                                                          |
| H  | 3.8666854 | 2.6219017  | -2.4089299 |                                                                                          |
| H  | 5.8123543 | -1.9593487 | -2.4726720 |                                                                                          |
| H  | 4.8955187 | 1.7431168  | -4.4974490 |                                                                                          |
| H  | 5.8743028 | -0.5584150 | -4.5295718 |                                                                                          |
| H  | 2.5434837 | 0.9751898  | 0.0408312  |                                                                                          |
| H  | 3.5506203 | 2.4244142  | 0.0181164  |                                                                                          |
| H  | 5.4689769 | -2.1136951 | -0.0461020 |                                                                                          |
| H  | 3.7330793 | -1.8262939 | -0.0004826 |                                                                                          |
| Fe | 2.5858680 | 4.3344305  | 6.2945104  | <b>[Fe<sup>IV</sup>(O)TMG<sub>3</sub>tren]<sup>2+</sup>-DHA-TS (<math>\sigma</math>)</b> |
| O  | 3.9076802 | 4.2107058  | 5.2128329  | <b>E<sub>B3LYP/def2-SVP(Fe:def2-TZVP)/COSMO(<math>\epsilon</math> = 35.88):</sub></b>    |
| N  | 0.8053033 | 4.5191126  | 7.7676867  | <b>-3253.2719808009 (&lt;S<sup>2</sup>&gt; 6.51805389)</b>                               |
| N  | 3.3835543 | 3.4434447  | 8.0033378  | <b>E<sub>B3LYP/def2-TZVPP/COSMO(<math>\epsilon</math> = 35.88):</sub></b>                |
| N  | 1.1200721 | 3.2211056  | 5.3048594  | <b>-3255.4489572209 (&lt;S<sup>2</sup>&gt; 6.51339206)</b>                               |
| N  | 2.3148657 | 6.4161873  | 6.3613351  | <b>ZPE<sub>B3LYP/def2-SVP(Fe:def2-TZVP)/COSMO(<math>\epsilon</math> = 35.88):</sub></b>  |
| N  | 5.2685455 | 2.7454774  | 9.2638980  | <b>0.936232</b>                                                                          |
| N  | 4.8025235 | 1.7486532  | 7.2182400  | <b>Chem. Pot.<sub>(298.15)/B3LYP/def2-SVP(Fe:def2-</sub></b>                             |
| N  | 0.5288696 | 1.5645567  | 3.7103882  | <b>TZVP)/COSMO(<math>\epsilon</math> = 35.88):</b>                                       |
| N  | 1.5459624 | 3.5340203  | 3.0205756  | <b>0.862698</b>                                                                          |
| N  | 2.6108182 | 8.5544600  | 5.3807981  |                                                                                          |
| N  | 4.4482181 | 7.3778641  | 6.1849859  |                                                                                          |
| C  | 1.1798207 | 3.7545860  | 8.9765396  |                                                                                          |
| H  | 0.9228590 | 2.6980971  | 8.8172867  |                                                                                          |
| H  | 0.6071036 | 4.1055480  | 9.8538363  |                                                                                          |
| C  | 2.6759981 | 3.8650728  | 9.2221379  |                                                                                          |
| H  | 2.9342192 | 4.8999788  | 9.5083308  |                                                                                          |
| H  | 2.9443074 | 3.2271926  | 10.0780300 |                                                                                          |
| C  | 4.4718466 | 2.6755956  | 8.1513120  |                                                                                          |
| C  | 5.5735376 | 4.0002323  | 9.9391425  |                                                                                          |
| H  | 5.2540422 | 4.8516128  | 9.3310501  |                                                                                          |
| H  | 6.6635719 | 4.0752939  | 10.0891963 |                                                                                          |
| H  | 5.0885886 | 4.0671212  | 10.9277830 |                                                                                          |
| C  | 5.8277411 | 1.5542972  | 9.8992821  |                                                                                          |
| H  | 5.3716558 | 0.6484944  | 9.4829470  |                                                                                          |
| H  | 5.6025939 | 1.5884212  | 10.9781817 |                                                                                          |
| H  | 6.9229222 | 1.4935914  | 9.7814313  |                                                                                          |
| C  | 6.1816784 | 1.3542731  | 6.9512858  |                                                                                          |

|   |            |            |           |
|---|------------|------------|-----------|
| H | 6.8799748  | 2.0446224  | 7.4355814 |
| H | 6.3611471  | 1.3967561  | 5.8666431 |
| H | 6.3885471  | 0.3272258  | 7.2954391 |
| C | 3.8106223  | 1.1308934  | 6.3540632 |
| H | 2.8157258  | 1.2483304  | 6.7970719 |
| H | 4.0343614  | 0.0560263  | 6.2631449 |
| H | 3.8132532  | 1.5835929  | 5.3499533 |
| C | -0.3700408 | 3.9405328  | 7.0830938 |
| H | -0.8185112 | 4.7127817  | 6.4426606 |
| H | -1.1371910 | 3.6324700  | 7.8163498 |
| C | 0.0576462  | 2.7687445  | 6.2162113 |
| H | 0.3938602  | 1.9330047  | 6.8547793 |
| H | -0.8157646 | 2.4025145  | 5.6554237 |
| C | 1.0814994  | 2.7730384  | 4.0425985 |
| C | 0.6605742  | 0.3739571  | 4.5403887 |
| H | 1.3996741  | 0.5342715  | 5.3301180 |
| H | 1.0047627  | -0.4663632 | 3.9146810 |
| H | -0.2982819 | 0.0848652  | 5.0029650 |
| C | -0.2832343 | 1.3846567  | 2.5089025 |
| H | -0.5313594 | 2.3559825  | 2.0653542 |
| H | -1.2243818 | 0.8831884  | 2.7891356 |
| H | 0.2234601  | 0.7610784  | 1.7530904 |
| C | 2.1484321  | 2.9538861  | 1.8242311 |
| H | 2.3563488  | 1.8888360  | 1.9793082 |
| H | 3.0990860  | 3.4663582  | 1.6202755 |
| H | 1.4996018  | 3.0672690  | 0.9396411 |
| C | 1.5390883  | 4.9875963  | 3.0727344 |
| H | 0.8318879  | 5.3231523  | 3.8398520 |
| H | 1.2127470  | 5.3791117  | 2.0958559 |
| H | 2.5379609  | 5.3883254  | 3.3014278 |
| C | 0.6303495  | 5.9599512  | 8.0458874 |
| H | 1.3204648  | 6.2495553  | 8.8507772 |
| H | -0.3959978 | 6.1682481  | 8.3985664 |
| C | 0.9564566  | 6.7703309  | 6.8018384 |
| H | 0.2053233  | 6.5741337  | 6.0165768 |
| H | 0.8830992  | 7.8412792  | 7.0449367 |
| C | 3.1082386  | 7.4209252  | 5.9677355 |
| C | 1.4938631  | 8.5261927  | 4.4450407 |
| H | 1.2859785  | 7.4997709  | 4.1278735 |
| H | 1.7567137  | 9.1162903  | 3.5514479 |
| H | 0.5764201  | 8.9574851  | 4.8802926 |
| C | 3.0948871  | 9.8913792  | 5.7198184 |
| H | 3.7469661  | 9.8518447  | 6.6001338 |
| H | 2.2297554  | 10.5298349 | 5.9642020 |
| H | 3.6408899  | 10.3615867 | 4.8847555 |
| C | 5.4075520  | 8.0838867  | 5.3412044 |
| H | 4.9505506  | 8.3535714  | 4.3816821 |
| H | 6.2677145  | 7.4261418  | 5.1452573 |

|   |            |           |            |
|---|------------|-----------|------------|
| H | 5.7939699  | 8.9970087 | 5.8231636  |
| C | 5.0264424  | 6.6146903 | 7.2808310  |
| H | 4.2548646  | 6.4075554 | 8.0306344  |
| H | 5.8261211  | 7.2086544 | 7.7507265  |
| H | 5.4481505  | 5.6593931 | 6.9307735  |
| C | 9.3321240  | 2.1852941 | 4.9766153  |
| C | 9.0548105  | 3.3842273 | 5.6473986  |
| C | 8.5213092  | 1.7790774 | 3.9111944  |
| C | 7.9702588  | 4.1652649 | 5.2478472  |
| C | 7.4268440  | 2.5537950 | 3.5046672  |
| C | 7.1464809  | 3.7670841 | 4.1762942  |
| C | 6.5321721  | 2.1218010 | 2.3643706  |
| C | 6.0117543  | 4.6099738 | 3.7186707  |
| C | 5.6730584  | 4.4916955 | 2.2770424  |
| C | 5.9464110  | 3.2835942 | 1.5940154  |
| C | 5.1077433  | 5.5699193 | 1.5673241  |
| C | 5.6612748  | 3.1870225 | 0.2256733  |
| C | 4.8215742  | 5.4610497 | 0.2062293  |
| C | 5.1002541  | 4.2645602 | -0.4684518 |
| H | 10.1848092 | 1.5711044 | 5.2781510  |
| H | 9.6898404  | 3.7120748 | 6.4745958  |
| H | 8.7457352  | 0.8480310 | 3.3822305  |
| H | 7.7641825  | 5.1089877 | 5.7608754  |
| H | 4.9069309  | 6.5092715 | 2.0906864  |
| H | 5.8855668  | 2.2569171 | -0.3049733 |
| H | 4.3896944  | 6.3090076 | -0.3316363 |
| H | 4.8863906  | 4.1733693 | -1.5366808 |
| H | 4.9955282  | 4.3154996 | 4.3995729  |
| H | 6.1140534  | 5.6564504 | 4.0348213  |
| H | 7.0684170  | 1.4385943 | 1.6880913  |
| H | 5.6957081  | 1.5236752 | 2.7826847  |

|    |            |            |            |
|----|------------|------------|------------|
| Fe | -1.8127432 | -0.2905016 | 0.0960943  |
| O  | 0.0004281  | -0.0032504 | 0.1461586  |
| N  | -4.1068001 | -0.6371153 | 0.0075940  |
| N  | -2.2023798 | -0.8809774 | 2.0494702  |
| N  | -1.9438937 | -1.7658131 | -1.3576835 |
| N  | -2.5001365 | 1.6160516  | -0.4301522 |
| N  | -1.4884421 | -0.7577163 | 4.3121643  |
| N  | -0.1394064 | -1.7691502 | 2.7165508  |
| N  | -0.7974189 | -3.5549772 | -2.4147266 |
| N  | -0.0463456 | -1.3732947 | -2.6764070 |
| N  | -1.9778145 | 3.6751976  | -1.4859237 |
| N  | -0.8580541 | 3.0337285  | 0.4527106  |
| C  | -4.4597928 | -1.3418639 | 1.2589332  |
| H  | -4.2546306 | -2.4128467 | 1.1235423  |
| H  | -5.5379402 | -1.2375589 | 1.4778201  |
| C  | -3.6229655 | -0.8196427 | 2.4189153  |

**$[Fe^{IV}(O)TMG_3tren]^{2+}$ -DHA-IC ( $\sigma$ )**

**$E_{B3LYP/def2-SVP(Fe:def2-TZVP)/COSMO(\epsilon = 35.88)}$ :**

**-3253.3137521106 ( $\langle S^2 \rangle$  7.04498858)**

**$E_{B3LYP/def2-TZVPP/COSMO(\epsilon = 35.88)}$ :**

**-3255.4941296469 ( $\langle S^2 \rangle$  7.04338375)**

**$ZPE_{B3LYP/def2-SVP(Fe:def2-TZVP)/COSMO(\epsilon = 35.88)}$ :**

**0.938204**

**Chem. Pot.<sub>(298.15)</sub> $/B3LYP/def2-SVP(Fe:def2-$**

**$TZVP)/COSMO(\epsilon = 35.88)$ :**

**0.86304**

|   |            |            |            |
|---|------------|------------|------------|
| H | -3.9388696 | 0.2084876  | 2.6658769  |
| H | -3.8249996 | -1.4311858 | 3.3127956  |
| C | -1.2952130 | -1.1157119 | 3.0074726  |
| C | -2.1873941 | 0.4583277  | 4.7105893  |
| H | -2.3268162 | 1.1226761  | 3.8526113  |
| H | -1.5799377 | 0.9916166  | 5.4601244  |
| H | -3.1713947 | 0.2416101  | 5.1591034  |
| C | -1.0014987 | -1.5749056 | 5.4217759  |
| H | -0.6964913 | -2.5641647 | 5.0609824  |
| H | -1.8182070 | -1.7060994 | 6.1503323  |
| H | -0.1515583 | -1.1028519 | 5.9430940  |
| C | 1.1384739  | -1.3892625 | 3.3082838  |
| H | 1.0217820  | -0.5023928 | 3.9416438  |
| H | 1.8455607  | -1.1394459 | 2.4996615  |
| H | 1.5701921  | -2.2063250 | 3.9101738  |
| C | -0.0550940 | -2.7698455 | 1.6646459  |
| H | -1.0617050 | -3.1215979 | 1.4111878  |
| H | 0.5347242  | -3.6256823 | 2.0318464  |
| H | 0.4307450  | -2.3634016 | 0.7635565  |
| C | -4.3510360 | -1.4652395 | -1.1926716 |
| H | -4.3812370 | -0.8050600 | -2.0707257 |
| H | -5.3303861 | -1.9731304 | -1.1270250 |
| C | -3.2285684 | -2.4787185 | -1.3723590 |
| H | -3.2872261 | -3.2405265 | -0.5761638 |
| H | -3.3728909 | -3.0118781 | -2.3255898 |
| C | -0.9444956 | -2.2296227 | -2.1218859 |
| C | -1.1343770 | -4.6178777 | -1.4750216 |
| H | -1.2873487 | -4.2105853 | -0.4710297 |
| H | -0.2982367 | -5.3346890 | -1.4302786 |
| H | -2.0402570 | -5.1674204 | -1.7811283 |
| C | -0.2989065 | -4.0168268 | -3.7088704 |
| H | -0.2950284 | -3.1928947 | -4.4319286 |
| H | -0.9695448 | -4.8065935 | -4.0848039 |
| H | 0.7177589  | -4.4382009 | -3.6351858 |
| C | 1.3721811  | -1.6943730 | -2.7881552 |
| H | 1.5913652  | -2.6432899 | -2.2854297 |
| H | 1.9590391  | -0.9020626 | -2.2949852 |
| H | 1.6979822  | -1.7605266 | -3.8393743 |
| C | -0.4058658 | -0.0228846 | -3.0744463 |
| H | -1.4966253 | 0.0732445  | -3.1179117 |
| H | 0.0077838  | 0.1804205  | -4.0760238 |
| H | -0.0035805 | 0.7259823  | -2.3739111 |
| C | -4.7287843 | 0.6994823  | -0.0902092 |
| H | -4.8015786 | 1.1250174  | 0.9204908  |
| H | -5.7552376 | 0.6284880  | -0.4935931 |
| C | -3.8735864 | 1.6169090  | -0.9543712 |
| H | -3.9121358 | 1.2789367  | -2.0041238 |
| H | -4.3024821 | 2.6313059  | -0.9359741 |

|   |            |            |            |
|---|------------|------------|------------|
| C | -1.7931573 | 2.7501564  | -0.5002401 |
| C | -2.3102550 | 3.3103564  | -2.8586920 |
| H | -2.1430183 | 2.2412699  | -3.0229163 |
| H | -1.6537019 | 3.8697471  | -3.5446750 |
| H | -3.3559630 | 3.5536082  | -3.1102707 |
| C | -1.9011653 | 5.1135263  | -1.2334892 |
| H | -1.8890992 | 5.3134024  | -0.1558178 |
| H | -2.7950876 | 5.5948481  | -1.6623169 |
| H | -1.0108877 | 5.5688286  | -1.6983951 |
| C | 0.3674027  | 3.7706604  | 0.1589615  |
| H | 0.5295257  | 3.8307835  | -0.9238906 |
| H | 1.2232302  | 3.2412837  | 0.6115234  |
| H | 0.3514958  | 4.7913269  | 0.5763158  |
| C | -1.0345666 | 2.6507987  | 1.8472950  |
| H | -2.0626848 | 2.3080178  | 2.0056822  |
| H | -0.8481605 | 3.5262519  | 2.4908793  |
| H | -0.3391358 | 1.8480228  | 2.1418069  |
| C | 4.4849201  | 1.1848826  | 3.3361602  |
| C | 4.1555714  | 2.4715586  | 2.8776736  |
| C | 4.7624098  | 0.1683567  | 2.4137898  |
| C | 4.1057736  | 2.7277849  | 1.5125053  |
| C | 4.7164156  | 0.4021458  | 1.0352496  |
| C | 4.3798380  | 1.7057916  | 0.5616166  |
| C | 5.0244097  | -0.7156047 | 0.0624219  |
| C | 4.3280464  | 1.9663583  | -0.8417371 |
| C | 4.6104944  | 0.9631839  | -1.8185514 |
| C | 4.9596370  | -0.3579143 | -1.4067085 |
| C | 4.5576682  | 1.2537782  | -3.2097024 |
| C | 5.2428435  | -1.3229832 | -2.3792527 |
| C | 4.8416979  | 0.2786670  | -4.1579044 |
| C | 5.1880292  | -1.0193428 | -3.7449744 |
| H | 4.5292325  | 0.9771102  | 4.4084796  |
| H | 3.9427357  | 3.2710586  | 3.5926158  |
| H | 5.0247781  | -0.8308363 | 2.7759177  |
| H | 3.8614154  | 3.7309741  | 1.1507379  |
| H | 4.2901953  | 2.2664955  | -3.5254363 |
| H | 5.5135236  | -2.3352936 | -2.0624870 |
| H | 4.7971510  | 0.5216436  | -5.2231312 |
| H | 5.4152060  | -1.7905342 | -4.4857723 |
| H | 0.4987674  | 0.8191096  | 0.0764495  |
| H | 4.0715016  | 2.9737507  | -1.1814312 |
| H | 6.0271468  | -1.1247653 | 0.2899780  |
| H | 4.3375812  | -1.5617054 | 0.2569019  |

### 5.2.2 $\text{Cu}^{\text{III}}(\text{OH})(\text{L})$ pathway (B3LYP)

Method: B3LYP/def2-SVP(Cu:def2-TZVP)/COSMO( $\epsilon = 8.51$ )

|   |            |            |            |                                                                                                                                                                                                                                                                                                                                                                                                                                                                                                                                        |
|---|------------|------------|------------|----------------------------------------------------------------------------------------------------------------------------------------------------------------------------------------------------------------------------------------------------------------------------------------------------------------------------------------------------------------------------------------------------------------------------------------------------------------------------------------------------------------------------------------|
| C | -1.4110746 | -0.5811711 | 0.1864074  | <p style="text-align: center;"><b><i>CHD</i></b></p> <p><b>E</b><sub>B3LYP/def2-SVP/COSMO(<math>\epsilon = 8.51</math>):</sub></p> <p><b>-233.0949079571</b></p> <p><b>E</b><sub>B3LYP/def2-TZVPP/COSMO(<math>\epsilon = 8.51</math>):</sub></p> <p><b>-233.3530859463</b></p> <p><b>ZPE</b><sub>B3LYP/def2-SVP/COSMO(<math>\epsilon = 8.51</math>):</sub></p> <p><b>0.121605</b></p> <p><b>Chem. Pot.</b><sub>(298.15)/B3LYP/def2-SVP/COSMO(<math>\epsilon = 8.51</math>):</sub></p> <p><b>0.094502 (<math>\sigma = 4</math>)</b></p> |
| C | -0.0433063 | -1.2130284 | 0.1868696  |                                                                                                                                                                                                                                                                                                                                                                                                                                                                                                                                        |
| C | 1.0724370  | -0.2005383 | 0.1863025  |                                                                                                                                                                                                                                                                                                                                                                                                                                                                                                                                        |
| C | 0.8694511  | 1.1238161  | 0.1860749  |                                                                                                                                                                                                                                                                                                                                                                                                                                                                                                                                        |
| C | -0.4983167 | 1.7556738  | 0.1860713  |                                                                                                                                                                                                                                                                                                                                                                                                                                                                                                                                        |
| C | -1.6140606 | 0.7431835  | 0.1860358  |                                                                                                                                                                                                                                                                                                                                                                                                                                                                                                                                        |
| H | -2.2715345 | -1.2603502 | 0.1863915  |                                                                                                                                                                                                                                                                                                                                                                                                                                                                                                                                        |
| H | 2.0968129  | -0.5908306 | 0.1862730  |                                                                                                                                                                                                                                                                                                                                                                                                                                                                                                                                        |
| H | 1.7299106  | 1.8029953  | 0.1856497  |                                                                                                                                                                                                                                                                                                                                                                                                                                                                                                                                        |
| H | -2.6384368 | 1.1334754  | 0.1856475  |                                                                                                                                                                                                                                                                                                                                                                                                                                                                                                                                        |
| H | -0.6019635 | 2.4320887  | -0.6867080 |                                                                                                                                                                                                                                                                                                                                                                                                                                                                                                                                        |
| H | -0.6020100 | 2.4321149  | 1.0588273  |                                                                                                                                                                                                                                                                                                                                                                                                                                                                                                                                        |
| H | 0.0603226  | -1.8888584 | 1.0601106  |                                                                                                                                                                                                                                                                                                                                                                                                                                                                                                                                        |
| H | 0.0604170  | -1.8900523 | -0.6854244 |                                                                                                                                                                                                                                                                                                                                                                                                                                                                                                                                        |
| C | -3.5664355 | -0.7614063 | 0.1200915  | <p style="text-align: center;"><b><i>DHA</i></b></p> <p><b>E</b><sub>B3LYP/def2-SVP/COSMO(<math>\epsilon = 8.51</math>):</sub></p> <p><b>-540.0041012622</b></p> <p><b>E</b><sub>B3LYP/def2-TZVPP/COSMO(<math>\epsilon = 8.51</math>):</sub></p> <p><b>-540.5854693574</b></p> <p><b>ZPE</b><sub>B3LYP/def2-SVP/COSMO(<math>\epsilon = 8.51</math>):</sub></p> <p><b>0.217078</b></p> <p><b>Chem. Pot.</b><sub>(298.15)/B3LYP/def2-SVP/COSMO(<math>\epsilon = 8.51</math>):</sub></p> <p><b>0.18259 (<math>\sigma = 2</math>)</b></p>  |
| C | -3.5736524 | 0.6118827  | 0.3884271  |                                                                                                                                                                                                                                                                                                                                                                                                                                                                                                                                        |
| C | -2.3977057 | -1.3717106 | -0.3475301 |                                                                                                                                                                                                                                                                                                                                                                                                                                                                                                                                        |
| C | -2.4120217 | 1.3650768  | 0.1874918  |                                                                                                                                                                                                                                                                                                                                                                                                                                                                                                                                        |
| C | -1.2321748 | -0.6213765 | -0.5592466 |                                                                                                                                                                                                                                                                                                                                                                                                                                                                                                                                        |
| C | -1.2393415 | 0.7614569  | -0.2886968 |                                                                                                                                                                                                                                                                                                                                                                                                                                                                                                                                        |
| C | 0.0435691  | -1.2507224 | -1.0816461 |                                                                                                                                                                                                                                                                                                                                                                                                                                                                                                                                        |
| C | 0.0291973  | 1.5539064  | -0.5323394 |                                                                                                                                                                                                                                                                                                                                                                                                                                                                                                                                        |
| C | 1.2771470  | 0.7582663  | -0.2065563 |                                                                                                                                                                                                                                                                                                                                                                                                                                                                                                                                        |
| C | 1.2842735  | -0.6244828 | -0.4775173 |                                                                                                                                                                                                                                                                                                                                                                                                                                                                                                                                        |
| C | 2.4176903  | 1.3588879  | 0.3454258  |                                                                                                                                                                                                                                                                                                                                                                                                                                                                                                                                        |
| C | 2.4318457  | -1.3776383 | -0.1910000 |                                                                                                                                                                                                                                                                                                                                                                                                                                                                                                                                        |
| C | 3.5620006  | 0.6028503  | 0.6211548  |                                                                                                                                                                                                                                                                                                                                                                                                                                                                                                                                        |
| C | 3.5691151  | -0.7702789 | 0.3519436  |                                                                                                                                                                                                                                                                                                                                                                                                                                                                                                                                        |
| H | -4.4680029 | -1.3589856 | 0.2812141  |                                                                                                                                                                                                                                                                                                                                                                                                                                                                                                                                        |
| H | -4.4809344 | 1.0956988  | 0.7607854  |                                                                                                                                                                                                                                                                                                                                                                                                                                                                                                                                        |
| H | -2.3887716 | -2.4473304 | -0.5496337 |                                                                                                                                                                                                                                                                                                                                                                                                                                                                                                                                        |
| H | -2.4143916 | 2.4376698  | 0.4052765  |                                                                                                                                                                                                                                                                                                                                                                                                                                                                                                                                        |
| H | 2.4083347  | 2.4313698  | 0.5635672  |                                                                                                                                                                                                                                                                                                                                                                                                                                                                                                                                        |
| H | 2.4336276  | -2.4531365 | -0.3939530 |                                                                                                                                                                                                                                                                                                                                                                                                                                                                                                                                        |
| H | 4.4442286  | 1.0843407  | 1.0521171  |                                                                                                                                                                                                                                                                                                                                                                                                                                                                                                                                        |
| H | 4.4569512  | -1.3700171 | 0.5709218  |                                                                                                                                                                                                                                                                                                                                                                                                                                                                                                                                        |
| H | 0.0645358  | 1.8406524  | -1.6034748 |                                                                                                                                                                                                                                                                                                                                                                                                                                                                                                                                        |
| H | 0.0120213  | 2.4997593  | 0.0306666  |                                                                                                                                                                                                                                                                                                                                                                                                                                                                                                                                        |
| H | 0.0368911  | -2.3392022 | -0.9171586 |                                                                                                                                                                                                                                                                                                                                                                                                                                                                                                                                        |
| H | 0.0794599  | -1.1117635 | -2.1817432 |                                                                                                                                                                                                                                                                                                                                                                                                                                                                                                                                        |

|   |            |           |            |                                                                                                                                                                                                     |
|---|------------|-----------|------------|-----------------------------------------------------------------------------------------------------------------------------------------------------------------------------------------------------|
| H | -4.5384713 | 4.4455857 | 0.1230360  | <p style="text-align: center;"><b><i>Cu<sup>III</sup>(OH)(L)</i></b></p> <p><b>E</b><sub>B3LYP/def2-SVP(Cu:def2-TZVP)/COSMO(<math>\epsilon = 8.51</math>):</sub></p> <p><b>-3232.5271394185</b></p> |
| C | -4.5011574 | 3.3613687 | 0.0047112  |                                                                                                                                                                                                     |
| C | -4.3053119 | 0.6109200 | -0.2907882 |                                                                                                                                                                                                     |
| C | -5.6595963 | 2.5825155 | -0.1348635 |                                                                                                                                                                                                     |
| C | -3.2693878 | 2.7098386 | -0.0110868 |                                                                                                                                                                                                     |

|    |            |            |            |
|----|------------|------------|------------|
| N  | -3.2319618 | 1.3866339  | -0.1556621 |
| C  | -5.5727999 | 1.1906173  | -0.2850839 |
| H  | -6.6396552 | 3.0652816  | -0.1264349 |
| H  | -6.4564683 | 0.5598756  | -0.3954661 |
| C  | -1.8959393 | 3.3287386  | 0.1200227  |
| O  | -1.7411495 | 4.5362527  | 0.2632464  |
| C  | -3.9583511 | -0.8538149 | -0.4360971 |
| O  | -4.8260501 | -1.7103426 | -0.5719179 |
| N  | -2.6101321 | -1.0473585 | -0.3928425 |
| N  | -0.9168332 | 2.3798501  | 0.0565301  |
| Cu | -1.5548637 | 0.5667085  | -0.1705336 |
| H  | 0.7226318  | 0.3856141  | -0.0956722 |
| O  | 0.0250762  | -0.2822635 | -0.1947284 |
| C  | 0.4531476  | 2.7332760  | 0.1550860  |
| C  | 3.1646180  | 3.4006060  | 0.3473044  |
| C  | 1.0829180  | 2.7424222  | 1.4302739  |
| C  | 1.1840220  | 3.0388826  | -1.0262794 |
| C  | 2.5391725  | 3.3745286  | -0.9003629 |
| C  | 2.4406264  | 3.0849348  | 1.4981544  |
| H  | 3.1179791  | 3.6233459  | -1.7933155 |
| H  | 2.9426552  | 3.1084610  | 2.4686121  |
| H  | 4.2229045  | 3.6653022  | 0.4227506  |
| C  | -2.0336675 | -2.3300892 | -0.5033063 |
| C  | -0.9031739 | -4.8790225 | -0.7241638 |
| C  | -1.8016548 | -3.0962054 | 0.6718471  |
| C  | -1.6687032 | -2.8243360 | -1.7854002 |
| C  | -1.1127853 | -4.1074146 | -1.8689865 |
| C  | -1.2425458 | -4.3729260 | 0.5323538  |
| H  | -0.8374745 | -4.5145667 | -2.8450585 |
| H  | -1.0680256 | -4.9864150 | 1.4197287  |
| H  | -0.4684789 | -5.8787921 | -0.8112133 |
| C  | 0.5196601  | 3.0512578  | -2.3987991 |
| H  | -0.4678797 | 2.5790379  | -2.2893633 |
| C  | 0.2823605  | 4.4974423  | -2.8772255 |
| H  | -0.2623816 | 4.5040859  | -3.8361801 |
| H  | 1.2378491  | 5.0276045  | -3.0290503 |
| H  | -0.3078361 | 5.0645313  | -2.1407143 |
| C  | 1.2979543  | 2.2309734  | -3.4412205 |
| H  | 0.7406856  | 2.1969025  | -4.3917640 |
| H  | 1.4497057  | 1.1944874  | -3.0991318 |
| H  | 2.2875565  | 2.6664776  | -3.6565874 |
| C  | 0.3102105  | 2.4332189  | 2.7080804  |
| H  | -0.6662857 | 2.0236196  | 2.4101300  |
| C  | 0.0372772  | 3.7225731  | 3.5075815  |
| H  | -0.4939341 | 4.4642065  | 2.8906784  |
| H  | 0.9776909  | 4.1814243  | 3.8569890  |
| H  | -0.5810223 | 3.5051458  | 4.3945577  |
| C  | 1.0016068  | 1.3652267  | 3.5722813  |

**E**<sub>B3LYP/def2-TZVPP/COSMO( $\epsilon = 8.51$ ):</sub>

**-3234.2848324600**

**ZPE**<sub>B3LYP/def2-SVP(Cu:def2-TZVP)/COSMO( $\epsilon = 8.51$ ):</sub>

**0.632973**

**Chem. Pot.**<sub>(298.15)/B3LYP/def2-SVP(Cu:def2-</sub>

**TZVP)/COSMO( $\epsilon = 8.51$ ):**

**0.569457**



|    |            |            |            |                                                                    |
|----|------------|------------|------------|--------------------------------------------------------------------|
| H  | 1.9732787  | 1.7119948  | 3.9608413  |                                                                    |
| H  | 1.1749304  | 0.4414461  | 2.9970577  |                                                                    |
| H  | 0.3719302  | 1.1118407  | 4.4409373  |                                                                    |
| C  | -1.9121337 | -2.0111146 | -3.0514083 |                                                                    |
| H  | -2.1296970 | -0.9791227 | -2.7384960 |                                                                    |
| C  | -3.1515935 | -2.5308772 | -3.8072263 |                                                                    |
| H  | -4.0398369 | -2.5346154 | -3.1563994 |                                                                    |
| H  | -2.9917114 | -3.5608565 | -4.1690533 |                                                                    |
| H  | -3.3676398 | -1.8960661 | -4.6830619 |                                                                    |
| C  | -0.6778895 | -1.9522977 | -3.9663116 |                                                                    |
| H  | -0.4226993 | -2.9406618 | -4.3829365 |                                                                    |
| H  | 0.2012471  | -1.5747134 | -3.4202370 |                                                                    |
| H  | -0.8672116 | -1.2778054 | -4.8176700 |                                                                    |
| C  | -2.1898322 | -2.5761796 | 2.0511276  |                                                                    |
| H  | -2.3752373 | -1.4963268 | 1.9512106  |                                                                    |
| C  | -3.5043755 | -3.2241503 | 2.5308458  |                                                                    |
| H  | -3.8218655 | -2.7919370 | 3.4947883  |                                                                    |
| H  | -3.3800269 | -4.3111205 | 2.6737277  |                                                                    |
| H  | -4.3125609 | -3.0688531 | 1.7994547  |                                                                    |
| C  | -1.0684577 | -2.7455068 | 3.0892580  |                                                                    |
| H  | -1.3565140 | -2.2690292 | 4.0408646  |                                                                    |
| H  | -0.1330858 | -2.2777597 | 2.7428673  |                                                                    |
| H  | -0.8597466 | -3.8062868 | 3.3053501  |                                                                    |
| H  | -5.5803086 | 1.2058615  | 0.1766970  | <b>Cu<sup>III</sup>(OH)(L)-CHD-RC</b>                              |
| C  | -4.9216556 | 0.3363665  | 0.1448668  | <b>E<sub>B3LYP/def2-SVP(Cu:def2-TZVP)/COSMO(ε = 8.51):</sub></b>   |
| C  | -3.1678702 | -1.8101797 | 0.0604182  | <b>-3465.6207230790</b>                                            |
| C  | -5.4137480 | -0.9773528 | 0.1520271  | <b>E<sub>B3LYP/def2-TZVPP/COSMO(ε = 8.51):</sub></b>               |
| C  | -3.5406274 | 0.5169150  | 0.0943567  | <b>-3467.6334689277</b>                                            |
| N  | -2.7430688 | -0.5485328 | 0.0557023  | <b>ZPE<sub>B3LYP/def2-SVP(Cu:def2-TZVP)/COSMO(ε = 8.51):</sub></b> |
| C  | -4.5362356 | -2.0708111 | 0.1093192  | <b>0.755861</b>                                                    |
| H  | -6.4917929 | -1.1505210 | 0.1910434  | <b>Chem. Pot.<sub>(298.15)/B3LYP/def2-SVP(Cu:def2-</sub></b>       |
| H  | -4.8902332 | -3.1030584 | 0.1135439  | <b>TZVP)/COSMO(ε = 8.51):</b>                                      |
| C  | -2.7813989 | 1.8244680  | 0.0745854  | <b>0.685164</b>                                                    |
| O  | -3.3602275 | 2.9053857  | 0.1058598  |                                                                    |
| C  | -2.0365027 | -2.8124692 | 0.0100681  |                                                                    |
| O  | -2.2472962 | -4.0213639 | 0.0065338  |                                                                    |
| N  | -0.8271535 | -2.1870119 | -0.0271103 |                                                                    |
| N  | -1.4336896 | 1.6177770  | 0.0191787  |                                                                    |
| Cu | -0.9011259 | -0.2444082 | -0.0153063 |                                                                    |
| H  | 1.0984475  | 0.8993084  | -0.1013566 |                                                                    |
| O  | 0.8804857  | -0.0465559 | -0.0919416 |                                                                    |
| H  | 3.2204559  | -0.5641291 | 0.0532580  |                                                                    |
| C  | -0.5319431 | 2.7128730  | -0.0137769 |                                                                    |
| C  | 1.2442930  | 4.8742412  | -0.0776002 |                                                                    |
| C  | -0.0116704 | 3.2269239  | 1.2059141  |                                                                    |
| C  | -0.1417996 | 3.2609009  | -1.2666456 |                                                                    |
| C  | 0.7443832  | 4.3466433  | -1.2691423 |                                                                    |

|   |            |            |            |
|---|------------|------------|------------|
| C | 0.8710982  | 4.3138610  | 1.1452094  |
| H | 1.0492009  | 4.7911254  | -2.2196572 |
| H | 1.2744452  | 4.7327396  | 2.0701551  |
| H | 1.9320329  | 5.7240903  | -0.1021952 |
| C | 0.3866448  | -2.9035150 | -0.0670465 |
| C | 2.7889431  | -4.3336427 | -0.1470948 |
| C | 1.0240177  | -3.2684239 | 1.1502620  |
| C | 0.9685461  | -3.2231798 | -1.3238173 |
| C | 2.1669177  | -3.9478065 | -1.3361083 |
| C | 2.2209996  | -3.9919071 | 1.0820141  |
| H | 2.6258341  | -4.2167377 | -2.2909500 |
| H | 2.7219018  | -4.2955928 | 2.0047330  |
| H | 3.7241549  | -4.8999451 | -0.1783196 |
| C | 4.7268647  | 2.0276548  | -1.0984641 |
| C | 4.4120127  | 0.7274350  | -1.1754319 |
| C | 4.9701554  | 2.7472442  | 0.2031006  |
| H | 4.2477459  | 3.5825112  | 0.3083488  |
| H | 5.9595106  | 3.2480514  | 0.1821565  |
| C | 4.2546643  | -0.1655360 | 0.0264675  |
| H | 4.8957955  | -1.0638621 | -0.0788183 |
| C | 4.8758014  | 1.8394685  | 1.4022963  |
| C | 4.5599856  | 0.5394997  | 1.3210956  |
| C | -0.6953522 | 2.7245586  | -2.5825124 |
| H | -1.1744991 | 1.7580723  | -2.3657098 |
| C | -1.7869738 | 3.6602974  | -3.1393357 |
| H | -2.2359870 | 3.2333651  | -4.0518759 |
| H | -1.3669887 | 4.6465688  | -3.4004701 |
| H | -2.5879877 | 3.8173412  | -2.4005423 |
| C | 0.4040217  | 2.4589715  | -3.6246063 |
| H | -0.0269981 | 1.9762889  | -4.5171567 |
| H | 1.1843828  | 1.7949968  | -3.2196425 |
| H | 0.8907204  | 3.3899630  | -3.9589081 |
| C | -0.4274682 | 2.6533500  | 2.5563949  |
| H | -0.9020787 | 1.6792854  | 2.3644896  |
| C | -1.4852857 | 3.5513508  | 3.2291266  |
| H | -2.3546565 | 3.7026735  | 2.5707075  |
| H | -1.0653927 | 4.5428429  | 3.4699745  |
| H | -1.8384969 | 3.0974684  | 4.1703055  |
| C | 0.7680301  | 2.3972382  | 3.4889927  |
| H | 1.2539797  | 3.3348688  | 3.8055782  |
| H | 1.5296548  | 1.7701752  | 2.9985683  |
| H | 0.4321900  | 1.8792153  | 4.4023680  |
| C | 0.2990360  | -2.8304904 | -2.6353013 |
| H | -0.4980405 | -2.1126983 | -2.3917051 |
| C | -0.3716493 | -4.0500623 | -3.2980790 |
| H | -1.0900467 | -4.5270025 | -2.6128492 |
| H | 0.3766965  | -4.8079176 | -3.5860885 |
| H | -0.9134081 | -3.7486963 | -4.2105163 |

|    |            |            |            |                                                                    |
|----|------------|------------|------------|--------------------------------------------------------------------|
| C  | 1.2634695  | -2.1193624 | -3.5989794 |                                                                    |
| H  | 2.0692440  | -2.7871927 | -3.9461429 |                                                                    |
| H  | 1.7268467  | -1.2460671 | -3.1132727 |                                                                    |
| H  | 0.7207888  | -1.7688994 | -4.4926320 |                                                                    |
| C  | 0.4134894  | -2.9263289 | 2.5042307  |                                                                    |
| H  | -0.3857119 | -2.1919615 | 2.3247733  |                                                                    |
| C  | -0.2410152 | -4.1680441 | 3.1420038  |                                                                    |
| H  | -0.7434059 | -3.9012675 | 4.0871848  |                                                                    |
| H  | 0.5126227  | -4.9414699 | 3.3683806  |                                                                    |
| H  | -0.9891089 | -4.6110929 | 2.4662849  |                                                                    |
| C  | 1.4227376  | -2.2663333 | 3.4585133  |                                                                    |
| H  | 0.9188181  | -1.9508041 | 4.3871831  |                                                                    |
| H  | 1.8780710  | -1.3765003 | 2.9956053  |                                                                    |
| H  | 2.2339066  | -2.9560995 | 3.7447858  |                                                                    |
| H  | 5.0752775  | 2.2890166  | 2.3820712  |                                                                    |
| H  | 4.8110008  | 2.6206957  | -2.0165660 |                                                                    |
| H  | 4.2412816  | 0.2706276  | -2.1572680 |                                                                    |
| H  | 4.5039441  | -0.0599566 | 2.2373520  |                                                                    |
| H  | -4.4832955 | 4.4323747  | 0.1393451  | <b>Cu<sup>III</sup>(OH)(L)-CHD-TS</b>                              |
| C  | -4.4480563 | 3.3482342  | 0.0206623  | <b>E<sub>B3LYP/def2-SVP(Cu:def2-TZVP)/COSMO(ε = 8.51)</sub>:</b>   |
| C  | -4.2582986 | 0.5969737  | -0.2772458 | <b>-3465.6053997020 (&lt;S<sup>2</sup>&gt; 0.48079694)</b>         |
| C  | -5.6088601 | 2.5721612  | -0.1164453 | <b>E<sub>B3LYP/def2-TZVPP/COSMO(ε = 8.51)</sub>:</b>               |
| C  | -3.2175157 | 2.6911251  | 0.0013291  | <b>-3467.6148183357 (S = 0; &lt;S<sup>2</sup>&gt; 0.49509705)</b>  |
| N  | -3.1834949 | 1.3689417  | -0.1435751 | <b>-3467.6021338349 (S = 1; &lt;S<sup>2</sup>&gt; 2.01516229)</b>  |
| C  | -5.5261942 | 1.1801894  | -0.2682340 | <b>-3467.6189914014 (spin purified)</b>                            |
| H  | -6.5878483 | 3.0575931  | -0.1051239 | <b>ZPE<sub>B3LYP/def2-SVP(Cu:def2-TZVP)/COSMO(ε = 8.51)</sub>:</b> |
| H  | -6.4121943 | 0.5526833  | -0.3772995 | <b>0.749835</b>                                                    |
| C  | -1.8441067 | 3.3213935  | 0.1291796  | <b>Chem. Pot.<sub>(298.15)/B3LYP/def2-SVP(Cu:def2-</sub></b>       |
| O  | -1.7200628 | 4.5385409  | 0.2697961  | <b>TZVP)/COSMO(ε = 8.51):</b>                                      |
| C  | -3.9298633 | -0.8767962 | -0.4274199 | <b>0.679808</b>                                                    |
| O  | -4.8325462 | -1.7063864 | -0.5630719 |                                                                    |
| N  | -2.5947178 | -1.1007617 | -0.3905040 |                                                                    |
| N  | -0.8524492 | 2.3953894  | 0.0671681  |                                                                    |
| Cu | -1.4680191 | 0.5262229  | -0.1627610 |                                                                    |
| H  | 0.8721667  | 0.4445082  | -0.0856064 |                                                                    |
| O  | 0.2261068  | -0.2781346 | -0.1753039 |                                                                    |
| H  | 1.1903943  | -1.3375600 | -0.1939390 |                                                                    |
| C  | 0.5082026  | 2.7886743  | 0.1651605  |                                                                    |
| C  | 3.2190656  | 3.4865159  | 0.3499874  |                                                                    |
| C  | 1.1437379  | 2.8113375  | 1.4377549  |                                                                    |
| C  | 1.2375193  | 3.0977673  | -1.0166979 |                                                                    |
| C  | 2.5900130  | 3.4477773  | -0.8955156 |                                                                    |
| C  | 2.4984909  | 3.1677785  | 1.5023221  |                                                                    |
| H  | 3.1636101  | 3.6984450  | -1.7912948 |                                                                    |
| H  | 3.0008386  | 3.2007427  | 2.4721717  |                                                                    |
| H  | 4.2738810  | 3.7658749  | 0.4228649  |                                                                    |
| C  | -2.0836662 | -2.4177947 | -0.5059687 |                                                                    |

|   |            |            |            |
|---|------------|------------|------------|
| C | -1.0227474 | -5.0045089 | -0.7333170 |
| C | -1.9074829 | -3.2097187 | 0.6601915  |
| C | -1.7125028 | -2.9153311 | -1.7840236 |
| C | -1.1876734 | -4.2127835 | -1.8715325 |
| C | -1.3792838 | -4.5012495 | 0.5189788  |
| H | -0.9064878 | -4.6164211 | -2.8475280 |
| H | -1.2473549 | -5.1293977 | 1.4038457  |
| H | -0.6144433 | -6.0153023 | -0.8225786 |
| C | 4.2034082  | -1.0941764 | -1.0955593 |
| C | 3.0209564  | -1.7127364 | -1.3063402 |
| C | 4.7339983  | -0.8170370 | 0.2799462  |
| H | 4.7958653  | 0.2834305  | 0.4387561  |
| H | 5.7921139  | -1.1401507 | 0.3562495  |
| C | 2.1383244  | -2.1201209 | -0.1964201 |
| H | 1.5485950  | -3.0326410 | -0.3897319 |
| C | 3.9211215  | -1.4360177 | 1.3781809  |
| C | 2.7406121  | -2.0521001 | 1.1482147  |
| C | 0.5660131  | 3.0990694  | -2.3864854 |
| H | -0.3808421 | 2.5479625  | -2.2828593 |
| C | 0.2108961  | 4.5364923  | -2.8177517 |
| H | -0.3421926 | 4.5313274  | -3.7721759 |
| H | 1.1225048  | 5.1419046  | -2.9597560 |
| H | -0.4127114 | 5.0331745  | -2.0587368 |
| C | 1.3937546  | 2.3794566  | -3.4639263 |
| H | 0.8197777  | 2.3128890  | -4.4027814 |
| H | 1.6542400  | 1.3553963  | -3.1509564 |
| H | 2.3313272  | 2.9126832  | -3.6925073 |
| C | 0.3701701  | 2.5049986  | 2.7163536  |
| H | -0.5551829 | 1.9890853  | 2.4183650  |
| C | -0.0447513 | 3.8095216  | 3.4267667  |
| H | -0.6172588 | 4.4627039  | 2.7505365  |
| H | 0.8418292  | 4.3690395  | 3.7712667  |
| H | -0.6691578 | 3.5908370  | 4.3094593  |
| C | 1.1267094  | 1.5651795  | 3.6692603  |
| H | 2.0310454  | 2.0375829  | 4.0872023  |
| H | 1.4344227  | 0.6391423  | 3.1572482  |
| H | 0.4823019  | 1.2872853  | 4.5194758  |
| C | -1.9287490 | -2.0863344 | -3.0462988 |
| H | -2.0519214 | -1.0406178 | -2.7261913 |
| C | -3.2344401 | -2.5033097 | -3.7537261 |
| H | -4.0928684 | -2.4418749 | -3.0672860 |
| H | -3.1675282 | -3.5416886 | -4.1215299 |
| H | -3.4354046 | -1.8510545 | -4.6205940 |
| C | -0.7346149 | -2.1256807 | -4.0128912 |
| H | -0.5787744 | -3.1289246 | -4.4428485 |
| H | 0.1969905  | -1.8230861 | -3.5080757 |
| H | -0.9036543 | -1.4340975 | -4.8547796 |
| C | -2.3265391 | -2.7012959 | 2.0362657  |

|   |            |            |            |
|---|------------|------------|------------|
| H | -2.4637703 | -1.6129081 | 1.9497906  |
| C | -3.6852287 | -3.3021064 | 2.4500517  |
| H | -4.0253093 | -2.8754905 | 3.4090533  |
| H | -3.6105153 | -4.3959448 | 2.5761589  |
| H | -4.4526644 | -3.0984162 | 1.6878669  |
| C | -1.2601425 | -2.9369921 | 3.1183103  |
| H | -1.5718742 | -2.4722871 | 4.0683762  |
| H | -0.2927856 | -2.4963932 | 2.8278101  |
| H | -1.0992499 | -4.0094117 | 3.3175717  |
| H | 4.3224606  | -1.3811538 | 2.3953468  |
| H | 4.8178480  | -0.7801974 | -1.9456160 |
| H | 2.6765937  | -1.8957752 | -2.3293280 |
| H | 2.1842428  | -2.4920024 | 1.9820490  |

|    |            |            |            |
|----|------------|------------|------------|
| H  | -5.5211098 | 1.1594075  | 0.2487648  |
| C  | -4.8343946 | 0.3125671  | 0.2064854  |
| C  | -3.0157199 | -1.7813600 | 0.0958674  |
| C  | -5.2851671 | -1.0163807 | 0.2193615  |
| C  | -3.4578258 | 0.5345404  | 0.1362709  |
| N  | -2.6333372 | -0.5080237 | 0.0855123  |
| C  | -4.3770196 | -2.0845967 | 0.1637848  |
| H  | -6.3572259 | -1.2218907 | 0.2734805  |
| H  | -4.7030933 | -3.1257802 | 0.1725857  |
| C  | -2.7487408 | 1.8810225  | 0.1097251  |
| O  | -3.4034115 | 2.9271800  | 0.1491789  |
| C  | -1.8602512 | -2.7693331 | 0.0324975  |
| O  | -2.0869125 | -3.9833739 | 0.0292950  |
| N  | -0.6599306 | -2.1464330 | -0.0133332 |
| N  | -1.4051914 | 1.7413719  | 0.0432491  |
| Cu | -0.7375902 | -0.1492849 | -0.0414510 |
| H  | 1.3640647  | 1.3087108  | -0.2955772 |
| O  | 1.1700985  | 0.3637644  | -0.4128194 |
| H  | 1.9912683  | -0.1315900 | -0.2248331 |
| C  | -0.5563495 | 2.8801243  | 0.0127255  |
| C  | 1.2345234  | 5.0447071  | -0.0536130 |
| C  | -0.0413166 | 3.4085352  | 1.2300356  |
| C  | -0.1615788 | 3.4323885  | -1.2378471 |
| C  | 0.7321279  | 4.5148166  | -1.2428808 |
| C  | 0.8484686  | 4.4915603  | 1.1688123  |
| H  | 1.0380362  | 4.9555411  | -2.1949715 |
| H  | 1.2458621  | 4.9145932  | 2.0945550  |
| H  | 1.9270763  | 5.8906337  | -0.0789190 |
| C  | 0.5384431  | -2.9106608 | -0.0553486 |
| C  | 2.9614997  | -4.3287994 | -0.1403246 |
| C  | 1.1587969  | -3.3188553 | 1.1568487  |
| C  | 1.1370950  | -3.2090648 | -1.3093771 |
| C  | 2.3472607  | -3.9189250 | -1.3249608 |
| C  | 2.3673172  | -4.0285317 | 1.0865613  |

***Cu<sup>III</sup>(OH)(L)-CHD-IC***

**E<sub>B3LYP/def2-SVP(Cu:def2-TZVP)/COSMO(ε = 8.51):</sub>**

**-3465.6440302639 (<S<sup>2</sup>> 1.03881585)**

**E<sub>B3LYP/def2-TZVPP/COSMO(ε = 8.51):</sub>**

**-3467.6525467610 (S = 0; <S<sup>2</sup>> 1.03693909)**

**-3467.6525079370 (S = 1; <S<sup>2</sup>> 2.03876534)**

**-3467.6525885633 (spin purified)**

**ZPE<sub>B3LYP/def2-SVP(Cu:def2-TZVP)/COSMO(ε = 8.51):</sub>**

**0.753768**

**Chem. Pot.<sub>(298.15)/B3LYP/def2-SVP(Cu:def2-</sub>**

**TZVP)/COSMO(ε = 8.51):**

**0.682639**

|   |            |            |            |
|---|------------|------------|------------|
| H | 2.8163639  | -4.1633571 | -2.2813123 |
| H | 2.8524490  | -4.3581187 | 2.0089235  |
| H | 3.9029101  | -4.8844511 | -0.1733653 |
| C | 4.6960576  | 1.5671234  | -1.2010321 |
| C | 4.4523105  | 0.2181625  | -1.1750032 |
| C | 4.7028097  | 2.3995203  | 0.0481129  |
| H | 3.9868786  | 3.2469441  | -0.0499931 |
| H | 5.6781187  | 2.9273888  | 0.1480675  |
| C | 4.1804533  | -0.4644998 | 0.0477572  |
| H | 4.0224438  | -1.5460581 | 0.0522243  |
| C | 4.4128764  | 1.6189527  | 1.2969122  |
| C | 4.1750139  | 0.2685017  | 1.2713153  |
| C | -0.7300696 | 2.9031831  | -2.5515350 |
| H | -1.1666299 | 1.9154066  | -2.3394393 |
| C | -1.8763978 | 3.8067046  | -3.0491141 |
| H | -2.3387870 | 3.3852591  | -3.9576705 |
| H | -1.5040396 | 4.8155169  | -3.2969673 |
| H | -2.6564849 | 3.9102538  | -2.2793824 |
| C | 0.3394847  | 2.7039048  | -3.6377561 |
| H | -0.1044076 | 2.2239520  | -4.5253580 |
| H | 1.1596045  | 2.0602961  | -3.2796488 |
| H | 0.7792265  | 3.6588726  | -3.9696332 |
| C | -0.4823577 | 2.8515635  | 2.5806947  |
| H | -0.8900064 | 1.8456190  | 2.3954397  |
| C | -1.6260527 | 3.7020933  | 3.1707612  |
| H | -2.4651172 | 3.7810066  | 2.4630953  |
| H | -1.2755785 | 4.7230173  | 3.4005438  |
| H | -2.0009113 | 3.2553898  | 4.1071709  |
| C | 0.6706123  | 2.7000809  | 3.5860434  |
| H | 1.0759822  | 3.6749001  | 3.9037593  |
| H | 1.5021019  | 2.1120216  | 3.1640545  |
| H | 0.3168039  | 2.1847055  | 4.4939526  |
| C | 0.4551189  | -2.8257739 | -2.6199655 |
| H | -0.2798726 | -2.0412521 | -2.3832677 |
| C | -0.3311057 | -4.0238601 | -3.1904888 |
| H | -1.0457202 | -4.4147806 | -2.4500073 |
| H | 0.3520581  | -4.8442869 | -3.4699991 |
| H | -0.8922092 | -3.7295467 | -4.0936472 |
| C | 1.4202220  | -2.2438491 | -3.6649116 |
| H | 2.1505384  | -2.9898223 | -4.0193998 |
| H | 1.9814025  | -1.3863784 | -3.2592004 |
| H | 0.8594551  | -1.8936634 | -4.5471425 |
| C | 0.5100724  | -3.0483983 | 2.5121496  |
| H | -0.2515987 | -2.2693236 | 2.3554292  |
| C | -0.2227973 | -4.3046652 | 3.0256288  |
| H | -0.7568789 | -4.0877784 | 3.9663448  |
| H | 0.4913531  | -5.1221632 | 3.2247891  |
| H | -0.9542641 | -4.6615569 | 2.2851119  |

|   |           |            |            |
|---|-----------|------------|------------|
| C | 1.4959793 | -2.5152022 | 3.5646051  |
| H | 0.9580983 | -2.2480622 | 4.4891106  |
| H | 2.0205376 | -1.6136458 | 3.2080826  |
| H | 2.2590607 | -3.2629516 | 3.8366414  |
| H | 4.4065620 | 2.1600945  | 2.2477552  |
| H | 4.9021239 | 2.0702144  | -2.1505729 |
| H | 4.4654673 | -0.3514879 | -2.1091918 |
| H | 3.9808838 | -0.2628446 | 2.2079519  |

|    |            |            |            |
|----|------------|------------|------------|
| H  | -4.6826027 | 4.4246884  | 0.3184253  |
| C  | -4.6093688 | 3.3401413  | 0.2220337  |
| C  | -4.3217347 | 0.5930211  | -0.0225875 |
| C  | -5.7423697 | 2.5163338  | 0.1458920  |
| C  | -3.3555543 | 2.7340960  | 0.1698412  |
| N  | -3.2737793 | 1.4100379  | 0.0532428  |
| C  | -5.6090721 | 1.1256610  | 0.0212697  |
| H  | -6.7388239 | 2.9627906  | 0.1836285  |
| H  | -6.4717442 | 0.4602261  | -0.0408551 |
| C  | -2.0025767 | 3.4064855  | 0.2295375  |
| O  | -1.8895208 | 4.6218779  | 0.3461041  |
| C  | -3.9271638 | -0.8609320 | -0.1510652 |
| O  | -4.7695914 | -1.7487858 | -0.2392066 |
| N  | -2.5725486 | -1.0074719 | -0.1507480 |
| N  | -0.9912866 | 2.4950995  | 0.1375819  |
| Cu | -1.5678663 | 0.6520862  | -0.0178174 |
| H  | 0.7194220  | 0.5613483  | -0.0919678 |
| O  | 0.0450310  | -0.1363955 | -0.1009638 |
| H  | 1.7949655  | -1.7075173 | -0.0023538 |
| C  | 0.3666944  | 2.9024086  | 0.1756557  |
| C  | 3.0558371  | 3.6734733  | 0.2484265  |
| C  | 1.0439914  | 2.9604506  | 1.4248612  |
| C  | 1.0397747  | 3.2093451  | -1.0394706 |
| C  | 2.3849196  | 3.5975275  | -0.9731682 |
| C  | 2.3890886  | 3.3549364  | 1.4329002  |
| H  | 2.9199003  | 3.8464688  | -1.8926851 |
| H  | 2.9266043  | 3.4171911  | 2.3823295  |
| H  | 4.1052118  | 3.9793506  | 0.2773355  |
| C  | -1.9601569 | -2.2743717 | -0.2527097 |
| C  | -0.7761693 | -4.7994839 | -0.4571400 |
| C  | -1.6698992 | -3.0079147 | 0.9303972  |
| C  | -1.6238880 | -2.7868081 | -1.5351608 |
| C  | -1.0404645 | -4.0578640 | -1.6102905 |
| C  | -1.0851196 | -4.2735612 | 0.7992039  |
| H  | -0.7875551 | -4.4792730 | -2.5863879 |
| H  | -0.8668083 | -4.8629528 | 1.6930536  |
| H  | -0.3222158 | -5.7913559 | -0.5374812 |
| H  | 5.9974257  | 0.4921229  | -1.7987438 |
| C  | 5.2665815  | -0.2940776 | -2.0130966 |

***Cu<sup>III</sup>(OH)(L)-DHA-RC***

**E<sub>B3LYP/def2-SVP(Cu:def2-TZVP)/COSMO(ε = 8.51):</sub>**

**-3772.5299617668**

**E<sub>B3LYP/def2-TZVPP/COSMO(ε = 8.51):</sub>**

**-3774.8654251167**

**ZPE<sub>B3LYP/def2-SVP(Cu:def2-TZVP)/COSMO(ε = 8.51):</sub>**

**0.851331**

**Chem. Pot.<sub>(298.15)/B3LYP/def2-SVP(Cu:def2-</sub>**

**TZVP)/COSMO(ε = 8.51):**

**0.776904**

|   |            |            |            |
|---|------------|------------|------------|
| C | 3.4178578  | -2.3085713 | -2.5506520 |
| C | 4.4774199  | -0.8021654 | -0.9712848 |
| C | 5.1313552  | -0.7807118 | -3.3172530 |
| C | 4.2025138  | -1.7919172 | -3.5868565 |
| C | 3.5429021  | -1.8216877 | -1.2410596 |
| H | 5.7543206  | -0.3756999 | -4.1198181 |
| H | 4.0935980  | -2.1834800 | -4.6022955 |
| H | 2.6962040  | -3.1042543 | -2.7590387 |
| C | 4.5895618  | -0.2764473 | 0.4453642  |
| H | 3.8229501  | 0.5124147  | 0.5902427  |
| H | 5.5596985  | 0.2212903  | 0.5996421  |
| C | 2.6924414  | -2.3526576 | -0.1062562 |
| H | 2.3021190  | -3.3527394 | -0.3494120 |
| C | 4.3725481  | -1.3584401 | 1.4835883  |
| C | 3.4372212  | -2.3770562 | 1.2117421  |
| C | 5.0677600  | -1.3651358 | 2.7014520  |
| H | 5.8005814  | -0.5780536 | 2.9058599  |
| C | 4.8376567  | -2.3646934 | 3.6523608  |
| H | 5.3883500  | -2.3581415 | 4.5973111  |
| C | 3.2161676  | -3.3784968 | 2.1688093  |
| H | 2.4934142  | -4.1718495 | 1.9554979  |
| C | 3.9071489  | -3.3748734 | 3.3848426  |
| H | 3.7242081  | -4.1639854 | 4.1197723  |
| C | 0.3211785  | 3.1688811  | -2.3839403 |
| H | -0.6258513 | 2.6297038  | -2.2320653 |
| C | -0.0357522 | 4.5936724  | -2.8533441 |
| H | -0.6195848 | 4.5591586  | -3.7884597 |
| H | 0.8747002  | 5.1862069  | -3.0462510 |
| H | -0.6309507 | 5.1232510  | -2.0934526 |
| C | 1.1095465  | 2.4026271  | -3.4590686 |
| H | 0.5100526  | 2.3181139  | -4.3803845 |
| H | 1.3614498  | 1.3847093  | -3.1211394 |
| H | 2.0495744  | 2.9127263  | -3.7261551 |
| C | 0.3340294  | 2.6465682  | 2.7374029  |
| H | -0.6343516 | 2.1897107  | 2.4851454  |
| C | 0.0358188  | 3.9402412  | 3.5209132  |
| H | -0.5496360 | 4.6454473  | 2.9104213  |
| H | 0.9681943  | 4.4457555  | 3.8246058  |
| H | -0.5385397 | 3.7160913  | 4.4353790  |
| C | 1.1023321  | 1.6273972  | 3.5955488  |
| H | 2.0707132  | 2.0242457  | 3.9419793  |
| H | 1.2968467  | 0.7005764  | 3.0325661  |
| H | 0.5155792  | 1.3653654  | 4.4913870  |
| C | -1.9258187 | -2.0062811 | -2.8088681 |
| H | -2.1578417 | -0.9733547 | -2.5097759 |
| C | -3.1754602 | -2.5695739 | -3.5151260 |
| H | -4.0431952 | -2.5802971 | -2.8371906 |
| H | -3.0026501 | -3.6029484 | -3.8611813 |



|   |            |            |            |
|---|------------|------------|------------|
| H | -3.4331963 | -1.9584532 | -4.3966274 |
| C | -0.7213829 | -1.9377135 | -3.7619296 |
| H | -0.4617037 | -2.9275851 | -4.1725715 |
| H | 0.1664754  | -1.5381389 | -3.2471937 |
| H | -0.9497073 | -1.2797266 | -4.6168318 |
| C | -2.0263609 | -2.4659586 | 2.3098352  |
| H | -2.2089222 | -1.3867037 | 2.1964825  |
| C | -3.3337050 | -3.1008894 | 2.8263943  |
| H | -3.6310472 | -2.6512095 | 3.7888844  |
| H | -3.2074595 | -4.1853691 | 2.9863444  |
| H | -4.1560608 | -2.9583743 | 2.1085965  |
| C | -0.8871210 | -2.6255753 | 3.3296325  |
| H | -1.1505674 | -2.1207442 | 4.2738780  |
| H | 0.0500952  | -2.1854185 | 2.9544407  |
| H | -0.6922575 | -3.6837639 | 3.5702604  |

|    |            |            |            |
|----|------------|------------|------------|
| H  | -4.1902480 | 4.7419690  | -0.0685681 |
| C  | -4.2157155 | 3.6560142  | -0.1720485 |
| C  | -4.1766053 | 0.8955007  | -0.4213409 |
| C  | -5.4121869 | 2.9500565  | -0.3666348 |
| C  | -3.0286570 | 2.9254320  | -0.1116144 |
| N  | -3.0648973 | 1.6015146  | -0.2372606 |
| C  | -5.4052856 | 1.5534581  | -0.4940066 |
| H  | -6.3587170 | 3.4936762  | -0.4188390 |
| H  | -6.3196322 | 0.9774632  | -0.6448742 |
| C  | -1.6322623 | 3.4767051  | 0.0923176  |
| O  | -1.4470179 | 4.6860485  | 0.2330746  |
| C  | -3.9350734 | -0.5970693 | -0.5251618 |
| O  | -4.8815023 | -1.3707967 | -0.6928135 |
| N  | -2.6220693 | -0.9063486 | -0.4064891 |
| N  | -0.6933662 | 2.4954453  | 0.0970391  |
| Cu | -1.3982117 | 0.6542855  | -0.1611991 |
| H  | 0.9317541  | 0.5142321  | -0.0067432 |
| O  | 0.2911303  | -0.2081232 | -0.1336511 |
| H  | 1.2174668  | -1.2266136 | -0.2180778 |
| C  | 0.6757511  | 2.8211002  | 0.2808793  |
| C  | 3.3985669  | 3.3864846  | 0.6401297  |
| C  | 1.2279034  | 2.8148767  | 1.5924216  |
| C  | 1.4920570  | 3.0968885  | -0.8515111 |
| C  | 2.8496360  | 3.3796146  | -0.6432114 |
| C  | 2.5909845  | 3.1049527  | 1.7443527  |
| H  | 3.4907748  | 3.6017478  | -1.4995949 |
| H  | 3.0315606  | 3.1152559  | 2.7442611  |
| H  | 4.4591430  | 3.6124163  | 0.7810450  |
| C  | -2.2007012 | -2.2583180 | -0.4621461 |
| C  | -1.2684741 | -4.9007102 | -0.5551253 |
| C  | -2.0757929 | -3.0010176 | 0.7435857  |
| C  | -1.8759955 | -2.8437256 | -1.7152819 |

***Cu<sup>III</sup>(OH)(L)-DHA-TS***

**E<sub>B3LYP/def2-SVP(Cu:def2-TZVP)/COSMO(ε = 8.51):</sub>**

**-3772.5111701159 (<S<sup>2</sup>> 0.50062830)**

**E<sub>B3LYP/def2-TZVPP/COSMO(ε = 8.51):</sub>**

**-3774.8423596806 (S = 0; <S<sup>2</sup>> 0.51836229)**

**-3774.8300055974 (S = 1; <S<sup>2</sup>> 2.01602640)**

**-3774.8466818511 (spin purified)**

**ZPE<sub>B3LYP/def2-SVP(Cu:def2-TZVP)/COSMO(ε = 8.51):</sub>**

**0.845117**

**Chem. Pot.<sub>(298.15)/B3LYP/def2-SVP(Cu:def2-</sub>**

**TZVP)/COSMO(ε = 8.51):**

**0.771166**

|   |            |            |            |
|---|------------|------------|------------|
| C | -1.4088708 | -4.1662411 | -1.7342157 |
| C | -1.6064642 | -4.3203767 | 0.6696368  |
| H | -1.1600721 | -4.6367834 | -2.6890656 |
| H | -1.5115815 | -4.9114481 | 1.5840294  |
| H | -0.9038817 | -5.9312715 | -0.5912587 |
| H | 5.9560835  | 0.2938269  | -1.5672795 |
| C | 5.1034291  | -0.3178902 | -1.8769976 |
| C | 2.9454448  | -1.8971253 | -2.6734163 |
| C | 4.2006722  | -0.7768140 | -0.9092473 |
| C | 4.9322398  | -0.6356074 | -3.2278673 |
| C | 3.8480264  | -1.4305445 | -3.6268783 |
| C | 3.1050643  | -1.5809400 | -1.3079347 |
| H | 5.6480114  | -0.2703998 | -3.9692488 |
| H | 3.7147130  | -1.6903265 | -4.6803540 |
| H | 2.1079296  | -2.5301755 | -2.9773273 |
| C | 4.3623199  | -0.4136126 | 0.5484752  |
| H | 3.8628866  | 0.5646415  | 0.7193277  |
| H | 5.4231445  | -0.2338903 | 0.7848857  |
| C | 2.1516102  | -2.0722513 | -0.2879100 |
| H | 1.5455100  | -2.9273720 | -0.6244670 |
| C | 3.7724296  | -1.4241146 | 1.5046295  |
| C | 2.6799601  | -2.2227340 | 1.0853729  |
| C | 4.2733232  | -1.5750675 | 2.8039518  |
| H | 5.1244202  | -0.9668359 | 3.1247615  |
| C | 3.7050817  | -2.4954729 | 3.6904316  |
| H | 4.1108681  | -2.6022773 | 4.7000555  |
| C | 2.1144614  | -3.1467523 | 1.9888356  |
| H | 1.2737534  | -3.7627839 | 1.6590682  |
| C | 2.6216328  | -3.2854876 | 3.2791930  |
| H | 2.1788456  | -4.0111543 | 3.9665220  |
| C | 0.9085352  | 3.1396166  | -2.2603368 |
| H | -0.0739738 | 2.6457404  | -2.2188755 |
| C | 0.6668890  | 4.5973963  | -2.7020603 |
| H | 0.1732628  | 4.6279933  | -3.6881012 |
| H | 1.6201546  | 5.1469995  | -2.7855569 |
| H | 0.0296844  | 5.1278491  | -1.9781682 |
| C | 1.7574938  | 2.3752935  | -3.2891239 |
| H | 1.2427942  | 2.3548803  | -4.2639515 |
| H | 1.9321751  | 1.3339016  | -2.9750836 |
| H | 2.7403072  | 2.8482428  | -3.4497182 |
| C | 0.3585417  | 2.5522046  | 2.8182285  |
| H | -0.5723132 | 2.0868594  | 2.4604223  |
| C | -0.0302423 | 3.8789940  | 3.5017763  |
| H | -0.5208947 | 4.5610407  | 2.7905690  |
| H | 0.8609199  | 4.3901882  | 3.9045884  |
| H | -0.7220796 | 3.6962082  | 4.3412514  |
| C | 1.0000721  | 1.5750990  | 3.8167215  |
| H | 1.9034559  | 1.9961696  | 4.2880635  |

|    |            |            |            |                                                                                |
|----|------------|------------|------------|--------------------------------------------------------------------------------|
| H  | 1.2833545  | 0.6288416  | 3.3282594  |                                                                                |
| H  | 0.2900375  | 1.3403059  | 4.6266991  |                                                                                |
| C  | -2.1010103 | -2.0903788 | -3.0235167 |                                                                                |
| H  | -2.2345355 | -1.0288750 | -2.7669447 |                                                                                |
| C  | -3.4037269 | -2.5645870 | -3.7002750 |                                                                                |
| H  | -4.2595206 | -2.4656080 | -3.0154815 |                                                                                |
| H  | -3.3277939 | -3.6225907 | -4.0049075 |                                                                                |
| H  | -3.6119581 | -1.9683502 | -4.6049562 |                                                                                |
| C  | -0.9109601 | -2.1718348 | -3.9916790 |                                                                                |
| H  | -0.7190987 | -3.2029687 | -4.3320373 |                                                                                |
| H  | 0.0090421  | -1.7893131 | -3.5235750 |                                                                                |
| H  | -1.1092485 | -1.5638898 | -4.8899275 |                                                                                |
| C  | -2.5175586 | -2.4105975 | 2.0802272  |                                                                                |
| H  | -2.5309377 | -1.3166366 | 1.9591372  |                                                                                |
| C  | -3.9591875 | -2.8513782 | 2.4112334  |                                                                                |
| H  | -4.3155757 | -2.3589173 | 3.3319983  |                                                                                |
| H  | -4.0063374 | -3.9421391 | 2.5728946  |                                                                                |
| H  | -4.6500055 | -2.5992005 | 1.5926857  |                                                                                |
| C  | -1.5669294 | -2.7255873 | 3.2448716  |                                                                                |
| H  | -1.8973658 | -2.1977518 | 4.1547447  |                                                                                |
| H  | -0.5368686 | -2.4070475 | 3.0226603  |                                                                                |
| H  | -1.5455878 | -3.8016270 | 3.4854439  |                                                                                |
| H  | -4.4491619 | 4.3797665  | 0.2388911  | <b><math>Cu^{III}(OH)(L)-DHA-IC</math></b>                                     |
| C  | -4.3870423 | 3.2948284  | 0.1411394  | <b><math>E_{B3LYP/def2-SVP(Cu:def2-TZVP)/COSMO(\epsilon = 8.51)}</math>:</b>   |
| C  | -4.1347184 | 0.5417916  | -0.1032575 | <b>-3772.5449710456 (&lt;S<sup>2</sup>&gt; 1.03125625)</b>                     |
| C  | -5.5292542 | 2.4887846  | 0.0192521  | <b><math>E_{B3LYP/def2-TZVPP/COSMO(\epsilon = 8.51)}</math>:</b>               |
| C  | -3.1404424 | 2.6662457  | 0.1346068  | <b>-3774.8762104980 (S = 0; &lt;S<sup>2</sup>&gt; 1.02955312)</b>              |
| N  | -3.0802163 | 1.3430137  | 0.0146545  | <b>-3774.8760477380 (S = 1; &lt;S<sup>2</sup>&gt; 2.03491663)</b>              |
| C  | -5.4163674 | 1.0957092  | -0.1051156 | <b>-3774.8763831711 (spin purified)</b>                                        |
| H  | -6.5191700 | 2.9519317  | 0.0211293  | <b><math>ZPE_{B3LYP/def2-SVP(Cu:def2-TZVP)/COSMO(\epsilon = 8.51)}</math>:</b> |
| H  | -6.2891773 | 0.4480523  | -0.2011505 | <b>0.84896</b>                                                                 |
| C  | -1.7790514 | 3.3353771  | 0.2513539  | <b>Chem. Pot.<sub>(298.15)/B3LYP/def2-SVP(Cu:def2-</sub></b>                   |
| O  | -1.6999143 | 4.5618079  | 0.3697821  | <b>TZVP)/COSMO(<math>\epsilon = 8.51</math>):</b>                              |
| C  | -3.7741949 | -0.9308599 | -0.2263444 | <b>0.773707</b>                                                                |
| O  | -4.6667157 | -1.7771708 | -0.3380704 |                                                                                |
| N  | -2.4366203 | -1.1304071 | -0.1953250 |                                                                                |
| N  | -0.7690842 | 2.4366601  | 0.2050094  |                                                                                |
| Cu | -1.3302412 | 0.5169003  | 0.0361546  |                                                                                |
| H  | 1.2376796  | 0.4636615  | 0.2683474  |                                                                                |
| O  | 0.5373583  | -0.2098871 | 0.2799136  |                                                                                |
| H  | 0.9362029  | -1.0675525 | 0.0454926  |                                                                                |
| C  | 0.5837172  | 2.8632450  | 0.2888742  |                                                                                |
| C  | 3.2966871  | 3.5769019  | 0.4432572  |                                                                                |
| C  | 1.2285065  | 2.9176174  | 1.5565182  |                                                                                |
| C  | 1.3053338  | 3.1577406  | -0.9024887 |                                                                                |
| C  | 2.6582302  | 3.5139203  | -0.7967710 |                                                                                |
| C  | 2.5839593  | 3.2790670  | 1.6057958  |                                                                                |

|   |            |            |            |
|---|------------|------------|------------|
| H | 3.2243598  | 3.7507073  | -1.7006803 |
| H | 3.0911790  | 3.3342930  | 2.5719996  |
| H | 4.3510917  | 3.8603451  | 0.5036873  |
| C | -1.9008281 | -2.4424858 | -0.3063339 |
| C | -0.6938277 | -4.9686595 | -0.5137775 |
| C | -1.6214511 | -3.1878509 | 0.8713523  |
| C | -1.5892701 | -2.9701492 | -1.5892616 |
| C | -0.9851932 | -4.2345761 | -1.6650156 |
| C | -1.0159216 | -4.4469470 | 0.7405721  |
| H | -0.7448356 | -4.6590010 | -2.6430898 |
| H | -0.7998381 | -5.0366734 | 1.6349769  |
| H | -0.2234192 | -5.9526601 | -0.5947222 |
| H | 5.5461232  | 0.6660553  | -2.2094884 |
| C | 4.8186560  | -0.1445520 | -2.3158003 |
| C | 2.9686443  | -2.2161512 | -2.6115921 |
| C | 4.3020928  | -0.7513899 | -1.1663541 |
| C | 4.4244236  | -0.5541391 | -3.5946441 |
| C | 3.4926079  | -1.5958933 | -3.7388786 |
| C | 3.3583434  | -1.8130730 | -1.3050306 |
| H | 4.8430592  | -0.0648025 | -4.4778332 |
| H | 3.1838186  | -1.9215850 | -4.7357140 |
| H | 2.2521758  | -3.0352384 | -2.7169155 |
| C | 4.7182331  | -0.2702840 | 0.2060853  |
| H | 4.3317385  | 0.7602315  | 0.3498644  |
| H | 5.8160866  | -0.1524786 | 0.2392950  |
| C | 2.8466306  | -2.4733623 | -0.1424263 |
| H | 2.1451556  | -3.3033837 | -0.2735565 |
| C | 4.2650514  | -1.1216328 | 1.3715703  |
| C | 3.3249354  | -2.1768939 | 1.1740524  |
| C | 4.7433562  | -0.8676832 | 2.6612317  |
| H | 5.4673873  | -0.0609885 | 2.8121329  |
| C | 4.3156898  | -1.6248133 | 3.7578091  |
| H | 4.7046647  | -1.4077798 | 4.7560323  |
| C | 2.9022128  | -2.9365417 | 2.2986944  |
| H | 2.1876418  | -3.7495637 | 2.1448522  |
| C | 3.3892277  | -2.6645152 | 3.5710048  |
| H | 3.0548101  | -3.2609355 | 4.4240041  |
| C | 0.6179908  | 3.1464613  | -2.2651237 |
| H | -0.2979867 | 2.5449071  | -2.1578763 |
| C | 0.1804445  | 4.5717293  | -2.6618156 |
| H | -0.3883663 | 4.5554466  | -3.6068777 |
| H | 1.0589957  | 5.2233946  | -2.8082044 |
| H | -0.4525660 | 5.0224624  | -1.8827211 |
| C | 1.4635415  | 2.4994768  | -3.3736186 |
| H | 0.8719561  | 2.4169888  | -4.3001844 |
| H | 1.8004843  | 1.4880049  | -3.0950653 |
| H | 2.3592563  | 3.0957896  | -3.6136946 |
| C | 0.4593499  | 2.6485401  | 2.8469818  |

|   |            |            |            |
|---|------------|------------|------------|
| H | -0.4586116 | 2.1086632  | 2.5684402  |
| C | 0.0227463  | 3.9749901  | 3.5019244  |
| H | -0.5580588 | 4.5895246  | 2.7973248  |
| H | 0.9003422  | 4.5613101  | 3.8242728  |
| H | -0.6002633 | 3.7835050  | 4.3919109  |
| C | 1.2265835  | 1.7612188  | 3.8403209  |
| H | 2.1236571  | 2.2626823  | 4.2393234  |
| H | 1.5489686  | 0.8163950  | 3.3735716  |
| H | 0.5839996  | 1.5122812  | 4.7007625  |
| C | -1.9635554 | -2.2195756 | -2.8653048 |
| H | -2.1315549 | -1.1686425 | -2.5836918 |
| C | -3.2935185 | -2.7558188 | -3.4348233 |
| H | -4.0917491 | -2.7111184 | -2.6789316 |
| H | -3.1854652 | -3.8052454 | -3.7590184 |
| H | -3.6093109 | -2.1637146 | -4.3105850 |
| C | -0.8621146 | -2.2324042 | -3.9367715 |
| H | -0.6759818 | -3.2455845 | -4.3300171 |
| H | 0.0908607  | -1.8422199 | -3.5454693 |
| H | -1.1585914 | -1.6026518 | -4.7917274 |
| C | -2.0343658 | -2.6701123 | 2.2469684  |
| H | -2.1814490 | -1.5833205 | 2.1513300  |
| C | -3.3909887 | -3.2756237 | 2.6635089  |
| H | -3.7345324 | -2.8431453 | 3.6185730  |
| H | -3.3070712 | -4.3677378 | 2.7987230  |
| H | -4.1595556 | -3.0847562 | 1.8993094  |
| C | -0.9727519 | -2.8902788 | 3.3353087  |
| H | -1.2903833 | -2.4119136 | 4.2764515  |
| H | -0.0019253 | -2.4572649 | 3.0467214  |
| H | -0.8147620 | -3.9596443 | 3.5529864  |

### 5.2.3 $[Fe^{IV}(O)TMG_3tren]^{2+}$ ( $\sigma$ ), $[Fe^{IV}(O)TMG_2dien(MeCN)]^{2+}$ ( $\sigma$ ) and $[Fe^{IV}(O)TMG_2dien(MeCN)]^{2+}$ ( $\pi$ ) pathways (B3LYP-D3)

Method: B3LYP-D3/def2-SVP(Fe:def2-TZVP)/COSMO( $\epsilon = 35.88$ )

|   |            |            |            |                                                                                                                                                                                                                                                                                                                                                                                                                                                                                                |
|---|------------|------------|------------|------------------------------------------------------------------------------------------------------------------------------------------------------------------------------------------------------------------------------------------------------------------------------------------------------------------------------------------------------------------------------------------------------------------------------------------------------------------------------------------------|
| C | -1.4119613 | -0.5813402 | 0.1866777  | <p style="text-align: center;"><b>CHD</b></p> <p><b>E</b><sub>B3LYP-D3/def2-SVP/COSMO(<math>\epsilon = 35.88</math>)</sub>:</p> <p><b>-233.1023616359</b></p> <p><b>E</b><sub>B3LYP-D3/def2-TZVPP/COSMO(<math>\epsilon = 35.88</math>)</sub>:</p> <p><b>-233.3606579473</b></p> <p><b>ZPE</b><sub>B3LYP-D3/def2-SVP/COSMO(<math>\epsilon = 35.88</math>)</sub>:</p> <p><b>0.121825</b></p> <p><b>Chem. Pot.</b><sub>(298.15)/B3LYP-D3/def2-SVP/COSMO(<math>\epsilon = 35.88</math>)</sub>:</p> |
| C | -0.0433912 | -1.2124765 | 0.1865911  |                                                                                                                                                                                                                                                                                                                                                                                                                                                                                                |
| C | 1.0733326  | -0.2004321 | 0.1866015  |                                                                                                                                                                                                                                                                                                                                                                                                                                                                                                |
| C | 0.8703374  | 1.1239852  | 0.1862897  |                                                                                                                                                                                                                                                                                                                                                                                                                                                                                                |
| C | -0.4982323 | 1.7551214  | 0.1857342  |                                                                                                                                                                                                                                                                                                                                                                                                                                                                                                |
| C | -1.6149565 | 0.7430773  | 0.1862790  |                                                                                                                                                                                                                                                                                                                                                                                                                                                                                                |
| H | -2.2710082 | -1.2622791 | 0.1870593  |                                                                                                                                                                                                                                                                                                                                                                                                                                                                                                |
| H | 2.0968857  | -0.5928307 | 0.1869418  |                                                                                                                                                                                                                                                                                                                                                                                                                                                                                                |
| H | 1.7293838  | 1.8049247  | 0.1863825  |                                                                                                                                                                                                                                                                                                                                                                                                                                                                                                |
| H | -2.6385100 | 1.1354753  | 0.1863816  |                                                                                                                                                                                                                                                                                                                                                                                                                                                                                                |
| H | -0.6017571 | 2.4305300  | -0.6876950 |                                                                                                                                                                                                                                                                                                                                                                                                                                                                                                |
| H | -0.6019217 | 2.4317505  | 1.0581859  |                                                                                                                                                                                                                                                                                                                                                                                                                                                                                                |
| H | 0.0602426  | -1.8885396 | 1.0594899  |                                                                                                                                                                                                                                                                                                                                                                                                                                                                                                |

|   |            |            |            |                                                                                                                                                                                                                                                                                                                                                                                                                                                                                                                                         |
|---|------------|------------|------------|-----------------------------------------------------------------------------------------------------------------------------------------------------------------------------------------------------------------------------------------------------------------------------------------------------------------------------------------------------------------------------------------------------------------------------------------------------------------------------------------------------------------------------------------|
| H | 0.0602054  | -1.8884489 | -0.6863914 | <b>0.094797 (<math>\sigma = 4</math>)</b>                                                                                                                                                                                                                                                                                                                                                                                                                                                                                               |
| C | -3.5492648 | -0.7666814 | 0.1461993  | <p style="text-align: center;"><b>DHA</b></p> <p><b>E</b><sub>B3LYP-D3/def2-SVP/COSMO(<math>\epsilon = 35.88</math>):</sub><br/> <b>-540.0255643803</b></p> <p><b>E</b><sub>B3LYP-D3/def2-TZVPP/COSMO(<math>\epsilon = 35.88</math>):</sub><br/> <b>-540.6071353248</b></p> <p><b>ZPE</b><sub>B3LYP-D3/def2-SVP/COSMO(<math>\epsilon = 35.88</math>):</sub><br/> <b>0.217425</b></p> <p><b>Chem. Pot.</b><sub>(298.15)/B3LYP-D3/def2-SVP/COSMO(<math>\epsilon = 35.88</math>):</sub><br/> <b>0.182998 (<math>\sigma = 2</math>)</b></p> |
| C | -3.5563323 | 0.6068804  | 0.4151635  |                                                                                                                                                                                                                                                                                                                                                                                                                                                                                                                                         |
| C | -2.3863934 | -1.3741389 | -0.3417281 |                                                                                                                                                                                                                                                                                                                                                                                                                                                                                                                                         |
| C | -2.4005063 | 1.3650163  | 0.1946140  |                                                                                                                                                                                                                                                                                                                                                                                                                                                                                                                                         |
| C | -1.2284241 | -0.6189383 | -0.5718221 |                                                                                                                                                                                                                                                                                                                                                                                                                                                                                                                                         |
| C | -1.2355248 | 0.7638963  | -0.3010167 |                                                                                                                                                                                                                                                                                                                                                                                                                                                                                                                                         |
| C | 0.0446237  | -1.2364957 | -1.1126839 |                                                                                                                                                                                                                                                                                                                                                                                                                                                                                                                                         |
| C | 0.0302879  | 1.5524300  | -0.5665943 |                                                                                                                                                                                                                                                                                                                                                                                                                                                                                                                                         |
| C | 1.2742013  | 0.7607970  | -0.2193002 |                                                                                                                                                                                                                                                                                                                                                                                                                                                                                                                                         |
| C | 1.2812650  | -0.6220544 | -0.4899937 |                                                                                                                                                                                                                                                                                                                                                                                                                                                                                                                                         |
| C | 2.4059580  | 1.3590973  | 0.3510587  |                                                                                                                                                                                                                                                                                                                                                                                                                                                                                                                                         |
| C | 2.4199155  | -1.3801091 | -0.1850918 |                                                                                                                                                                                                                                                                                                                                                                                                                                                                                                                                         |
| C | 3.5431270  | 0.5981354  | 0.6462273  |                                                                                                                                                                                                                                                                                                                                                                                                                                                                                                                                         |
| C | 3.5501154  | -0.7754653 | 0.3773877  |                                                                                                                                                                                                                                                                                                                                                                                                                                                                                                                                         |
| H | -4.4463858 | -1.3667970 | 0.3222208  |                                                                                                                                                                                                                                                                                                                                                                                                                                                                                                                                         |
| H | -4.4590021 | 1.0873287  | 0.8028613  |                                                                                                                                                                                                                                                                                                                                                                                                                                                                                                                                         |
| H | -2.3765914 | -2.4494525 | -0.5450393 |                                                                                                                                                                                                                                                                                                                                                                                                                                                                                                                                         |
| H | -2.4018306 | 2.4376609  | 0.4117981  |                                                                                                                                                                                                                                                                                                                                                                                                                                                                                                                                         |
| H | 2.3957653  | 2.4317408  | 0.5680144  |                                                                                                                                                                                                                                                                                                                                                                                                                                                                                                                                         |
| H | 2.4207036  | -2.4554130 | -0.3886897 |                                                                                                                                                                                                                                                                                                                                                                                                                                                                                                                                         |
| H | 4.4199033  | 1.0764022  | 1.0917333  |                                                                                                                                                                                                                                                                                                                                                                                                                                                                                                                                         |
| H | 4.4324295  | -1.3777518 | 0.6113241  |                                                                                                                                                                                                                                                                                                                                                                                                                                                                                                                                         |
| H | 0.0657789  | 1.8006762  | -1.6468147 |                                                                                                                                                                                                                                                                                                                                                                                                                                                                                                                                         |
| H | 0.0141195  | 2.5149337  | -0.0329980 |                                                                                                                                                                                                                                                                                                                                                                                                                                                                                                                                         |
| H | 0.0389850  | -2.3292727 | -0.9815508 |                                                                                                                                                                                                                                                                                                                                                                                                                                                                                                                                         |
| H | 0.0805332  | -1.0586584 | -2.2066907 |                                                                                                                                                                                                                                                                                                                                                                                                                                                                                                                                         |

**[Fe<sup>IV</sup>(O)TMG<sub>2</sub>dien(MeCN)]<sup>2+</sup> ( $\sigma$ ) pathway**

|    |           |            |           |                                                                                                                                                                                                                                                                                                                                                                                                                                                                                                                                                                                                                                                                                           |
|----|-----------|------------|-----------|-------------------------------------------------------------------------------------------------------------------------------------------------------------------------------------------------------------------------------------------------------------------------------------------------------------------------------------------------------------------------------------------------------------------------------------------------------------------------------------------------------------------------------------------------------------------------------------------------------------------------------------------------------------------------------------------|
| Fe | 4.7858346 | 9.4737996  | 3.1601846 | <p style="text-align: center;"><b>[Fe<sup>IV</sup>(O)TMG<sub>2</sub>dien(MeCN)]<sup>2+</sup></b></p> <p><b>E</b><sub>B3LYP-D3/def2-SVP(Fe: def2-TZVP)/COSMO(<math>\epsilon = 35.88</math>):</sub><br/> <b>-2445.7971144150 (&lt;S<sup>2</sup>&gt; 6.05144800)</b></p> <p><b>E</b><sub>B3LYP-D3/def2-TZVPP/COSMO(<math>\epsilon = 35.88</math>):</sub><br/> <b>-2447.1111691153 (&lt;S<sup>2</sup>&gt; 6.05369072)</b></p> <p><b>ZPE</b><sub>B3LYP-D3/def2-SVP(Fe: def2-TZVP)/COSMO(<math>\epsilon = 35.88</math>):</sub><br/> <b>0.574404</b></p> <p><b>Chem. Pot.</b><sub>(298.15)/B3LYP-D3/def2-SVP(Fe: def2-TZVP)/COSMO(<math>\epsilon = 35.88</math>):</sub><br/> <b>0.517299</b></p> |
| N  | 4.5058367 | 11.2995332 | 2.1430726 |                                                                                                                                                                                                                                                                                                                                                                                                                                                                                                                                                                                                                                                                                           |
| O  | 3.1813417 | 9.2752017  | 3.3759226 |                                                                                                                                                                                                                                                                                                                                                                                                                                                                                                                                                                                                                                                                                           |
| N  | 5.1974233 | 9.8797429  | 5.0214387 |                                                                                                                                                                                                                                                                                                                                                                                                                                                                                                                                                                                                                                                                                           |
| C  | 6.5859842 | 10.3032311 | 5.2500544 |                                                                                                                                                                                                                                                                                                                                                                                                                                                                                                                                                                                                                                                                                           |
| H  | 6.8823165 | 10.1247002 | 6.2956532 |                                                                                                                                                                                                                                                                                                                                                                                                                                                                                                                                                                                                                                                                                           |
| H  | 6.7372338 | 11.3771086 | 5.0515443 |                                                                                                                                                                                                                                                                                                                                                                                                                                                                                                                                                                                                                                                                                           |
| C  | 7.4442208 | 9.4719154  | 4.3130614 |                                                                                                                                                                                                                                                                                                                                                                                                                                                                                                                                                                                                                                                                                           |
| H  | 8.5073130 | 9.7595677  | 4.3606283 |                                                                                                                                                                                                                                                                                                                                                                                                                                                                                                                                                                                                                                                                                           |
| H  | 7.3616913 | 8.4138386  | 4.5960367 |                                                                                                                                                                                                                                                                                                                                                                                                                                                                                                                                                                                                                                                                                           |
| N  | 6.9321335 | 9.6273521  | 2.9184544 |                                                                                                                                                                                                                                                                                                                                                                                                                                                                                                                                                                                                                                                                                           |
| C  | 7.3384553 | 8.4889439  | 2.0443167 |                                                                                                                                                                                                                                                                                                                                                                                                                                                                                                                                                                                                                                                                                           |
| H  | 8.4020532 | 8.2453166  | 2.2048116 |                                                                                                                                                                                                                                                                                                                                                                                                                                                                                                                                                                                                                                                                                           |
| H  | 7.2123248 | 8.8153486  | 1.0028657 |                                                                                                                                                                                                                                                                                                                                                                                                                                                                                                                                                                                                                                                                                           |
| C  | 6.4376160 | 7.2970625  | 2.3036750 |                                                                                                                                                                                                                                                                                                                                                                                                                                                                                                                                                                                                                                                                                           |
| H  | 6.6279360 | 6.5115593  | 1.5562195 |                                                                                                                                                                                                                                                                                                                                                                                                                                                                                                                                                                                                                                                                                           |
| H  | 6.6549998 | 6.8597248  | 3.2919791 |                                                                                                                                                                                                                                                                                                                                                                                                                                                                                                                                                                                                                                                                                           |

|   |           |            |            |
|---|-----------|------------|------------|
| N | 5.0545573 | 7.7845267  | 2.2160839  |
| C | 4.2918628 | 9.9813281  | 6.0203387  |
| N | 4.2734472 | 11.0654903 | 6.8312801  |
| C | 4.6405282 | 12.3902427 | 6.3397272  |
| H | 4.6384907 | 12.3996548 | 5.2426977  |
| H | 5.6313476 | 12.7026174 | 6.7086875  |
| H | 3.8939510 | 13.1181639 | 6.6939393  |
| C | 3.9083838 | 10.9931617 | 8.2449041  |
| H | 3.9082969 | 9.9501662  | 8.5832911  |
| H | 2.9194327 | 11.4395937 | 8.4379297  |
| H | 4.6594191 | 11.5489214 | 8.8281074  |
| N | 3.4089638 | 8.9854417  | 6.2293526  |
| C | 2.0426353 | 9.2323320  | 6.6838702  |
| H | 1.8166209 | 10.3043127 | 6.6521408  |
| H | 1.8761009 | 8.8528384  | 7.7047059  |
| H | 1.3511948 | 8.7148229  | 6.0003757  |
| C | 3.6925503 | 7.6091376  | 5.8400210  |
| H | 4.7685313 | 7.4827075  | 5.6734555  |
| H | 3.1523176 | 7.3490557  | 4.9169828  |
| H | 3.3715535 | 6.9355120  | 6.6496127  |
| C | 7.4215700 | 10.8985670 | 2.3349693  |
| H | 8.5213372 | 10.8770740 | 2.2581391  |
| H | 7.1233717 | 11.7461830 | 2.9631273  |
| H | 6.9916929 | 11.0341296 | 1.3360066  |
| C | 4.0779223 | 6.9856626  | 1.7458411  |
| N | 4.1086751 | 5.6412066  | 1.9298252  |
| C | 4.6519921 | 5.0346654  | 3.1408781  |
| H | 4.7665324 | 5.7888071  | 3.9264608  |
| H | 5.6256480 | 4.5520677  | 2.9563361  |
| H | 3.9473136 | 4.2684315  | 3.5005939  |
| C | 3.6155671 | 4.7014168  | 0.9244578  |
| H | 3.4660424 | 5.2142208  | -0.0331886 |
| H | 2.6704449 | 4.2262061  | 1.2342067  |
| H | 4.3703162 | 3.9115302  | 0.7833112  |
| N | 3.0516993 | 7.5200355  | 1.0507821  |
| C | 1.6921480 | 6.9955157  | 1.1475916  |
| H | 1.6214127 | 6.2612623  | 1.9584585  |
| H | 1.3651984 | 6.5292466  | 0.2041425  |
| H | 1.0123031 | 7.8305486  | 1.3795664  |
| C | 3.1831250 | 8.7635994  | 0.3013197  |
| H | 4.2420306 | 8.9951149  | 0.1377217  |
| H | 2.7146024 | 9.5986770  | 0.8436585  |
| H | 2.6856079 | 8.6453204  | -0.6737902 |
| C | 4.2049469 | 12.2959388 | 1.6414617  |
| C | 3.8287404 | 13.5431651 | 1.0091718  |
| H | 4.1399946 | 13.5258513 | -0.0467248 |
| H | 2.7371206 | 13.6709684 | 1.0700966  |
| H | 4.3267878 | 14.3799541 | 1.5227180  |

|    |            |            |            |
|----|------------|------------|------------|
| Fe | -0.3355169 | 0.4206954  | -0.6869580 |
| N  | 0.8703801  | -0.5983625 | -2.0734470 |
| O  | 0.5539672  | -0.0359018 | 0.5989927  |
| N  | -1.8730262 | -0.6812882 | -0.2521932 |
| C  | -2.8876247 | -0.7361389 | -1.3129924 |
| H  | -3.8641379 | -1.0440361 | -0.9073347 |
| H  | -2.6271953 | -1.4553798 | -2.1078252 |
| C  | -2.9755791 | 0.6707629  | -1.8813653 |
| H  | -3.6810364 | 0.7338578  | -2.7261132 |
| H  | -3.3224940 | 1.3522721  | -1.0927898 |
| N  | -1.6136583 | 1.1047420  | -2.3151695 |
| C  | -1.4777682 | 2.5895866  | -2.3504802 |
| H  | -2.3697938 | 3.0443545  | -2.8131727 |
| H  | -0.6075515 | 2.8224922  | -2.9793910 |
| C  | -1.2327210 | 3.1236322  | -0.9518188 |
| H  | -0.9794401 | 4.1938857  | -0.9997356 |
| H  | -2.1479382 | 3.0364175  | -0.3430554 |
| N  | -0.1279294 | 2.3428996  | -0.3812813 |
| C  | -1.9756052 | -1.5013234 | 0.8187911  |
| N  | -2.3072022 | -2.8043895 | 0.6549960  |
| C  | -1.8890549 | -3.5414126 | -0.5331967 |
| H  | -1.1134225 | -2.9815987 | -1.0698429 |
| H  | -2.7356327 | -3.7357015 | -1.2121758 |
| H  | -1.4659791 | -4.5093183 | -0.2208970 |
| C  | -3.1163989 | -3.5544979 | 1.6131112  |
| H  | -3.5914063 | -2.8710704 | 2.3268960  |
| H  | -2.5185471 | -4.2992459 | 2.1633131  |
| H  | -3.9079845 | -4.0859276 | 1.0614692  |
| N  | -1.7721321 | -1.0112088 | 2.0549436  |
| C  | -1.2186944 | -1.8099552 | 3.1443532  |
| H  | -0.8605302 | -2.7716112 | 2.7671715  |
| H  | -1.9588522 | -1.9724757 | 3.9437280  |
| H  | -0.3570323 | -1.2700686 | 3.5667447  |
| C  | -1.9098053 | 0.4098191  | 2.3507051  |
| H  | -2.5068104 | 0.8997613  | 1.5732826  |
| H  | -0.9190233 | 0.8868695  | 2.3979429  |
| H  | -2.4142946 | 0.5256386  | 3.3219474  |
| C  | -1.3149462 | 0.5523661  | -3.6571518 |
| H  | -2.0197236 | 0.9647824  | -4.3982490 |
| H  | -1.4055139 | -0.5403274 | -3.6484340 |
| H  | -0.2921238 | 0.8190550  | -3.9464121 |
| C  | 0.7561096  | 2.9079872  | 0.4594084  |
| N  | 0.4139227  | 3.9396767  | 1.2741164  |
| C  | -0.9098471 | 4.0555461  | 1.8771154  |
| H  | -1.4552715 | 3.1110025  | 1.7872075  |
| H  | -1.5024408 | 4.8609318  | 1.4132847  |
| H  | -0.7933914 | 4.2829511  | 2.9485737  |
| C  | 1.3455009  | 5.0177032  | 1.6005728  |

**[Fe<sup>IV</sup>(O)TMG<sub>2</sub>dien(MeCN)]<sup>2+</sup>-CHD-RC (σ)**

**E**<sub>B3LYP-D3/def2-SVP(Fe:def2-TZVP)/COSMO(ε = 35.88):</sub>

**-2678.9113164419 (<S<sup>2</sup>> 6.05193047)**

**E**<sub>B3LYP-D3/def2-TZVPP/COSMO(ε = 35.88):</sub>

**-2680.4803982992 (<S<sup>2</sup>> 6.05439593)**

**ZPE**<sub>B3LYP-D3/def2-SVP(Fe:def2-TZVP)/COSMO(ε = 35.88):</sub>

**0.698111**

**Chem. Pot.**<sub>(298.15)/B3LYP-D3/def2-SVP(Fe:def2-</sub>

**TZVP)/COSMO(ε = 35.88):**

**0.634162**



|   |           |            |            |
|---|-----------|------------|------------|
| H | 2.2090209 | 4.9904817  | 0.9253109  |
| H | 1.6978379 | 4.9549275  | 2.6432544  |
| H | 0.8280574 | 5.9811545  | 1.4677766  |
| N | 2.0318464 | 2.4632870  | 0.4881829  |
| C | 2.7978033 | 2.3912042  | 1.7289535  |
| H | 2.1518293 | 2.5917460  | 2.5915938  |
| H | 3.6409958 | 3.1007631  | 1.7323837  |
| H | 3.1988639 | 1.3705592  | 1.8323081  |
| C | 2.6676103 | 1.8394453  | -0.6665045 |
| H | 2.1097787 | 2.0807880  | -1.5788436 |
| H | 2.7068798 | 0.7464310  | -0.5473317 |
| H | 3.6932405 | 2.2292874  | -0.7600516 |
| C | 1.5653184 | -1.1960519 | -2.7756089 |
| C | 2.4325305 | -1.9489149 | -3.6571936 |
| H | 2.0521599 | -1.8899743 | -4.6884264 |
| H | 3.4496812 | -1.5304453 | -3.6186701 |
| H | 2.4549895 | -3.0017485 | -3.3366990 |
| C | 1.6204945 | -3.8184402 | 1.1469413  |
| C | 2.2028800 | -3.5290016 | -0.2120810 |
| C | 3.2197694 | -2.4167331 | -0.1886035 |
| C | 3.4476703 | -1.6514014 | 0.8861557  |
| C | 2.7172379 | -1.8206734 | 2.1906201  |
| C | 1.8637309 | -3.0602612 | 2.2238941  |
| H | 0.9761512 | -4.7007490 | 1.2348276  |
| H | 3.7937525 | -2.2424798 | -1.1051435 |
| H | 4.1989383 | -0.8555988 | 0.8343020  |
| H | 1.4226522 | -3.3321877 | 3.1885184  |
| H | 2.0759040 | -0.9328171 | 2.3623219  |
| H | 3.4345421 | -1.8260146 | 3.0334611  |
| H | 2.6516456 | -4.4481763 | -0.6357676 |
| H | 1.3832339 | -3.2779138 | -0.9161421 |

|    |           |            |           |
|----|-----------|------------|-----------|
| Fe | 4.3756530 | 9.2653301  | 3.2261156 |
| N  | 3.7415840 | 10.9940120 | 2.1774938 |
| O  | 2.8215059 | 8.6991906  | 3.5766177 |
| N  | 4.9247984 | 9.7609767  | 5.0634175 |
| C  | 6.1319040 | 10.5944551 | 5.1218437 |
| H  | 6.5462388 | 10.6140674 | 6.1424595 |
| H  | 5.9316139 | 11.6412801 | 4.8362474 |
| C  | 7.1390391 | 9.9778391  | 4.1613933 |
| H  | 8.0858443 | 10.5452820 | 4.1490199 |
| H  | 7.3631876 | 8.9558802  | 4.4967612 |
| N  | 6.5528487 | 9.9146495  | 2.7966514 |
| C  | 7.1223794 | 8.8131445  | 1.9817522 |
| H  | 8.2219125 | 8.7791934  | 2.0833722 |
| H  | 6.8864744 | 9.0258738  | 0.9292491 |
| C  | 6.4942688 | 7.4803793  | 2.3618970 |
| H  | 6.8411029 | 6.7004760  | 1.6662593 |

**$[Fe^{IV}(O)TMG_2dien(MeCN)]^{2+}$ -CHD-TS ( $\sigma$ )**

**$E_{B3LYP-D3/def2-SVP(Fe:def2-TZVP)/COSMO(\epsilon = 35.88)}$ :**

**-2678.8956380853 (<S<sup>2</sup>> 6.42237422)**

**$E_{B3LYP-D3/def2-TZVPP/COSMO(\epsilon = 35.88)}$ :**

**-2680.4640206190 (<S<sup>2</sup>> 6.41717159)**

**$ZPE_{B3LYP-D3/def2-SVP(Fe:def2-TZVP)/COSMO(\epsilon = 35.88)}$ :**

**0.691413**

**Chem. Pot. (298.15)/B3LYP-D3/def2-SVP(Fe:def2-**

**TZVP)/COSMO( $\epsilon = 35.88$ ):**

**0.627566**

|   |           |            |            |
|---|-----------|------------|------------|
| H | 6.8221893 | 7.1780075  | 3.3708400  |
| N | 5.0383125 | 7.6380224  | 2.2962661  |
| C | 4.1601451 | 9.6131469  | 6.1603334  |
| N | 3.9184643 | 10.6606233 | 6.9914041  |
| C | 3.7962663 | 12.0175388 | 6.4692135  |
| H | 3.6378927 | 11.9902868 | 5.3837572  |
| H | 4.6868295 | 12.6280247 | 6.6940464  |
| H | 2.9213406 | 12.4998081 | 6.9335265  |
| C | 3.8136347 | 10.5255057 | 8.4420214  |
| H | 4.1381701 | 9.5259834  | 8.7554880  |
| H | 2.7855357 | 10.7019816 | 8.7996535  |
| H | 4.4748389 | 11.2695953 | 8.9149557  |
| N | 3.6391396 | 8.4037276  | 6.4534845  |
| C | 2.3562367 | 8.2322051  | 7.1263342  |
| H | 1.8676249 | 9.1993163  | 7.2773753  |
| H | 2.4764559 | 7.7316277  | 8.1002817  |
| H | 1.7047753 | 7.6103903  | 6.4909823  |
| C | 4.2069414 | 7.1763746  | 5.9109678  |
| H | 5.2516413 | 7.3425006  | 5.6239463  |
| H | 3.6380566 | 6.8534058  | 5.0251996  |
| H | 4.1628117 | 6.3901882  | 6.6798195  |
| C | 6.7306135 | 11.2044074 | 2.1025997  |
| H | 7.8025367 | 11.4092876 | 1.9322447  |
| H | 6.3072270 | 12.0201226 | 2.7023614  |
| H | 6.2137163 | 11.1800603 | 1.1351727  |
| C | 4.2525565 | 6.6502275  | 1.8451573  |
| N | 4.5768244 | 5.3384189  | 1.9929138  |
| C | 5.3037568 | 4.8384549  | 3.1545342  |
| H | 5.3212599 | 5.5918498  | 3.9475864  |
| H | 6.3392464 | 4.5584622  | 2.9006726  |
| H | 4.7874009 | 3.9453778  | 3.5411858  |
| C | 4.2246593 | 4.3301118  | 0.9957672  |
| H | 3.9112747 | 4.8129677  | 0.0624467  |
| H | 3.4175934 | 3.6669891  | 1.3489556  |
| H | 5.1135058 | 3.7126329  | 0.7896440  |
| N | 3.1019187 | 6.9513776  | 1.1966535  |
| C | 1.8799109 | 6.1794458  | 1.3948797  |
| H | 2.0196512 | 5.4345544  | 2.1868172  |
| H | 1.5603047 | 5.6721757  | 0.4700412  |
| H | 1.0779126 | 6.8656194  | 1.7124100  |
| C | 2.9330681 | 8.1931359  | 0.4541711  |
| H | 3.9115298 | 8.6328512  | 0.2270393  |
| H | 2.3402022 | 8.9201410  | 1.0297690  |
| H | 2.4102547 | 7.9765557  | -0.4906411 |
| C | 3.3197317 | 11.8932323 | 1.5877551  |
| C | 2.7987723 | 13.0155281 | 0.8357654  |
| H | 3.3497317 | 13.1067444 | -0.1130324 |
| H | 1.7327221 | 12.8493016 | 0.6202743  |

|   |            |            |           |
|---|------------|------------|-----------|
| H | 2.9203553  | 13.9407940 | 1.4191998 |
| C | 0.2122362  | 11.5440573 | 4.7362128 |
| C | 0.1534151  | 12.2009583 | 3.3869176 |
| C | -0.0617447 | 11.2330270 | 2.2571700 |
| C | -0.0195865 | 9.8968881  | 2.4271074 |
| C | 0.2824758  | 9.2779182  | 3.7379945 |
| C | 0.2368286  | 10.2057049 | 4.8898386 |
| H | 0.2143812  | 12.1985921 | 5.6139471 |
| H | -0.2801311 | 11.6504641 | 1.2684307 |
| H | -0.1884618 | 9.2325625  | 1.5736662 |
| H | 0.2548131  | 9.7730316  | 5.8930187 |
| H | 1.4427800  | 8.9209815  | 3.6717659 |
| H | -0.2220331 | 8.3133082  | 3.9106362 |
| H | -0.6351289 | 12.9789788 | 3.3766529 |
| H | 1.0848215  | 12.7841439 | 3.2196255 |

|    |            |            |            |
|----|------------|------------|------------|
| Fe | -0.1292200 | 0.4258964  | -0.4874836 |
| N  | 1.1289945  | -0.5225680 | -1.8945332 |
| O  | 0.9208811  | -0.0203652 | 0.9350118  |
| N  | -1.7525742 | -0.6995014 | -0.1700348 |
| C  | -2.6566605 | -0.8359068 | -1.3187948 |
| H  | -3.6436417 | -1.2066015 | -0.9997140 |
| H  | -2.2704754 | -1.5514725 | -2.0640054 |
| C  | -2.8020864 | 0.5392353  | -1.9553962 |
| H  | -3.4806222 | 0.5036520  | -2.8261095 |
| H  | -3.2442333 | 1.2211406  | -1.2162464 |
| N  | -1.4706122 | 1.0592202  | -2.3509608 |
| C  | -1.4171484 | 2.5386759  | -2.3482033 |
| H  | -2.2905476 | 2.9661651  | -2.8742359 |
| H  | -0.5132061 | 2.8373600  | -2.8989443 |
| C  | -1.3225290 | 3.0807259  | -0.9273238 |
| H  | -1.1717405 | 4.1707229  | -0.9657254 |
| H  | -2.2699955 | 2.9094528  | -0.3890394 |
| N  | -0.2000542 | 2.4147932  | -0.2617661 |
| C  | -1.9346934 | -1.4683469 | 0.9181694  |
| N  | -2.3413634 | -2.7610245 | 0.8150977  |
| C  | -1.9559529 | -3.5899771 | -0.3208571 |
| H  | -1.1103619 | -3.1340336 | -0.8494401 |
| H  | -2.7892886 | -3.7353436 | -1.0277905 |
| H  | -1.6422363 | -4.5789365 | 0.0488215  |
| C  | -3.2226934 | -3.3963321 | 1.7922474  |
| H  | -3.6570747 | -2.6419806 | 2.4590164  |
| H  | -2.6926054 | -4.1518502 | 2.3955024  |
| H  | -4.0426851 | -3.8979619 | 1.2538631  |
| N  | -1.7261756 | -0.9490976 | 2.1482540  |
| C  | -1.1846227 | -1.7329193 | 3.2534423  |
| H  | -0.8675918 | -2.7208132 | 2.9033558  |
| H  | -1.9186920 | -1.8534795 | 4.0661536  |

**[Fe<sup>IV</sup>(O)TMG<sub>2</sub>dien(MeCN)]<sup>2+</sup>-CHD-IC ( $\sigma$ )**

**E<sub>B3LYP-D3/def2-SVP(Fe:def2-TZVP)/COSMO( $\epsilon$  = 35.88):</sub>**

**-2678.9369866803 (<S<sup>2</sup>> 7.03885069)**

**E<sub>B3LYP-D3/def2-TZVPP/COSMO( $\epsilon$  = 35.88):</sub>**

**-2680.5065384748 (<S<sup>2</sup>> 7.03646759)**

**ZPE<sub>B3LYP-D3/def2-SVP(Fe:def2-TZVP)/COSMO( $\epsilon$  = 35.88):</sub>**

**0.69354**

**Chem. Pot.(298.15)/B3LYP-D3/def2-SVP(Fe:def2-**

**TZVP)/COSMO( $\epsilon$  = 35.88):**

**0.628654**

|   |            |            |            |
|---|------------|------------|------------|
| H | -0.3017301 | -1.2090540 | 3.6531200  |
| C | -1.8210088 | 0.4826303  | 2.4023503  |
| H | -2.4161670 | 0.9610195  | 1.6157920  |
| H | -0.8178864 | 0.9365195  | 2.4264717  |
| H | -2.3143074 | 0.6427351  | 3.3733365  |
| C | -1.0771145 | 0.5323368  | -3.6686815 |
| H | -1.7600388 | 0.8952482  | -4.4581635 |
| H | -1.1007840 | -0.5653242 | -3.6621143 |
| H | -0.0556509 | 0.8549347  | -3.9081033 |
| C | 0.6065793  | 3.0971730  | 0.5659598  |
| N | 0.1553375  | 4.1220455  | 1.3360671  |
| C | -1.1985638 | 4.1546324  | 1.8781462  |
| H | -1.6691597 | 3.1707287  | 1.7911428  |
| H | -1.8273179 | 4.9005132  | 1.3649122  |
| H | -1.1488515 | 4.4186419  | 2.9464886  |
| C | 0.9890889  | 5.2740854  | 1.6721306  |
| H | 1.8830329  | 5.2935815  | 1.0374041  |
| H | 1.2968295  | 5.2637100  | 2.7308655  |
| H | 0.4094430  | 6.1932102  | 1.4901317  |
| N | 1.9219757  | 2.7799567  | 0.6369160  |
| C | 2.6431406  | 2.7581805  | 1.9050725  |
| H | 1.9625708  | 2.9674338  | 2.7383658  |
| H | 3.4689663  | 3.4879641  | 1.9173756  |
| H | 3.0585068  | 1.7476535  | 2.0517022  |
| C | 2.6447293  | 2.2043797  | -0.4889816 |
| H | 2.0842611  | 2.3616367  | -1.4184010 |
| H | 2.8022070  | 1.1245274  | -0.3421888 |
| H | 3.6254060  | 2.6984283  | -0.5753858 |
| C | 1.8676089  | -1.0313175 | -2.6228059 |
| C | 2.7850123  | -1.6465063 | -3.5577497 |
| H | 2.7801176  | -1.0763739 | -4.4998251 |
| H | 3.8001403  | -1.6453036 | -3.1338915 |
| H | 2.4687010  | -2.6815006 | -3.7565233 |
| C | 1.3492135  | -3.8464969 | 1.1243481  |
| C | 1.8255127  | -4.2387496 | -0.2435164 |
| C | 3.0753238  | -3.5287172 | -0.6749194 |
| C | 3.6848391  | -2.5847144 | 0.1085151  |
| C | 3.1715207  | -2.2486156 | 1.3951393  |
| C | 2.0103589  | -2.9134819 | 1.8825352  |
| H | 0.4600624  | -4.3473442 | 1.5182077  |
| H | 3.5012605  | -3.7987139 | -1.6452587 |
| H | 4.5922655  | -2.0871793 | -0.2474028 |
| H | 1.6405483  | -2.6669580 | 2.8813072  |
| H | 1.4760831  | -0.8063732 | 1.0647913  |
| H | 3.6857590  | -1.5128630 | 2.0174280  |
| H | 1.9750622  | -5.3397811 | -0.2928729 |
| H | 1.0195418  | -4.0776877 | -0.9945039 |

|    |            |            |            |
|----|------------|------------|------------|
| Fe | 1.3092622  | 0.7546715  | 0.3784955  |
| N  | 0.4968548  | 2.2172917  | -0.9004615 |
| O  | 0.2617650  | -0.4118909 | -0.0680376 |
| N  | 0.6218800  | 0.9296301  | 2.1808556  |
| C  | 1.1989532  | 2.0432533  | 2.9466026  |
| H  | 1.0983848  | 1.8684039  | 4.0292424  |
| H  | 0.7067453  | 3.0057006  | 2.7277767  |
| C  | 2.6677225  | 2.0988090  | 2.5601784  |
| H  | 3.1923602  | 2.9403934  | 3.0413996  |
| H  | 3.1548827  | 1.1657676  | 2.8741463  |
| N  | 2.7726369  | 2.2095645  | 1.0740570  |
| C  | 4.0919440  | 1.7402023  | 0.5603604  |
| H  | 4.9090217  | 2.1371707  | 1.1858423  |
| H  | 4.2076296  | 2.1439533  | -0.4548193 |
| C  | 4.1174273  | 0.2251586  | 0.4955560  |
| H  | 5.0260016  | -0.1111034 | -0.0271102 |
| H  | 4.1559363  | -0.1995222 | 1.5121289  |
| N  | 2.9076198  | -0.1987986 | -0.2220658 |
| C  | -0.4100749 | 0.2206323  | 2.7030259  |
| N  | -1.4624801 | 0.8607787  | 3.2630637  |
| C  | -1.8750131 | 2.1817230  | 2.7968938  |
| H  | -1.4330023 | 2.3926959  | 1.8157115  |
| H  | -1.5841476 | 2.9724498  | 3.5077079  |
| H  | -2.9707678 | 2.1936284  | 2.6955502  |
| C  | -2.2255907 | 0.3262987  | 4.3900056  |
| H  | -1.6837074 | -0.5036880 | 4.8580572  |
| H  | -3.2257520 | -0.0167059 | 4.0792181  |
| H  | -2.3479789 | 1.1257410  | 5.1372020  |
| N  | -0.3689576 | -1.1230275 | 2.6808776  |
| C  | -1.5623214 | -1.9606771 | 2.5923959  |
| H  | -2.4441283 | -1.3549198 | 2.3697052  |
| H  | -1.7266912 | -2.5305325 | 3.5202760  |
| H  | -1.4239721 | -2.6716178 | 1.7648028  |
| C  | 0.8900569  | -1.8492971 | 2.5598892  |
| H  | 1.7290252  | -1.2011982 | 2.8361809  |
| H  | 1.0295390  | -2.1981831 | 1.5253366  |
| H  | 0.8663642  | -2.7181796 | 3.2347276  |
| C  | 2.5580771  | 3.6171839  | 0.6631868  |
| H  | 3.3373481  | 4.2593963  | 1.1059002  |
| H  | 1.5740562  | 3.9673247  | 0.9968080  |
| H  | 2.6103227  | 3.6951188  | -0.4282139 |
| C  | 2.9206180  | -1.3014919 | -0.9941903 |
| N  | 3.7458694  | -2.3481504 | -0.7286329 |
| C  | 4.0702253  | -2.7635176 | 0.6321056  |
| H  | 3.3890779  | -2.2932594 | 1.3484080  |
| H  | 5.1090152  | -2.5118296 | 0.9014121  |
| H  | 3.9464808  | -3.8554164 | 0.7089687  |
| C  | 4.3759408  | -3.1329901 | -1.7887069 |

**$[Fe^{IV}(O)TMG_2dien(MeCN)]^{2+}$ -DHA-RC ( $\sigma$ )**

**E**<sub>B3LYP-D3/def2-SVP(Fe:def2-TZVP)/COSMO( $\epsilon$  = 35.88):</sub>

**-2985.8471857051 (<S<sup>2</sup>> 6.05269199)**

**E**<sub>B3LYP-D3/def2-TZVPP/COSMO( $\epsilon$  = 35.88):</sub>

**-2987.7376222869 (<S<sup>2</sup>> 6.05486530)**

**ZPE**<sub>B3LYP-D3/def2-SVP(Fe:def2-TZVP)/COSMO( $\epsilon$  = 35.88):</sub>

**0.794496**

**Chem. Pot.**<sub>(298.15)/B3LYP-D3/def2-SVP(Fe:def2-</sub>

**TZVP)/COSMO( $\epsilon$  = 35.88):**

**0.727192**

|   |            |            |            |
|---|------------|------------|------------|
| H | 4.2834310  | -2.6147657 | -2.7506393 |
| H | 3.9343038  | -4.1394119 | -1.8741462 |
| H | 5.4465450  | -3.2436281 | -1.5536926 |
| N | 2.1168805  | -1.3781081 | -2.0764364 |
| C | 1.5110772  | -2.6375538 | -2.4997071 |
| H | 1.6451291  | -3.4066076 | -1.7303015 |
| H | 1.9328924  | -2.9967282 | -3.4523390 |
| H | 0.4325882  | -2.4712071 | -2.6382861 |
| C | 1.6563984  | -0.2002520 | -2.8034741 |
| H | 2.2713455  | 0.6673235  | -2.5388548 |
| H | 0.6034177  | 0.0158167  | -2.5711795 |
| H | 1.7496957  | -0.3921160 | -3.8836459 |
| C | 0.1340480  | 3.0027422  | -1.6655548 |
| C | -0.2789999 | 4.0060348  | -2.6241696 |
| H | -0.3764452 | 3.5440685  | -3.6179389 |
| H | -1.2458263 | 4.4345972  | -2.3205188 |
| H | 0.4777516  | 4.8050264  | -2.6617012 |
| C | -1.7777066 | -0.3236608 | -4.7369769 |
| C | -2.0399477 | 1.0115904  | -4.4115693 |
| C | -1.8688875 | -1.3091532 | -3.7476552 |
| C | -2.3805786 | 1.3495712  | -3.0968220 |
| C | -2.1904580 | -0.9733008 | -2.4250912 |
| C | -2.4379730 | 0.3732597  | -2.0939098 |
| C | -2.2688845 | -2.0143238 | -1.3307645 |
| C | -2.7367907 | 0.7242628  | -0.6542207 |
| C | -3.5464930 | -0.3436954 | 0.0461514  |
| C | -3.3279561 | -1.6916936 | -0.2993359 |
| C | -4.4783651 | -0.0286999 | 1.0452749  |
| C | -4.0558340 | -2.6965677 | 0.3527058  |
| C | -5.1852115 | -1.0382544 | 1.7085339  |
| C | -4.9755503 | -2.3772719 | 1.3575016  |
| H | -1.5178445 | -0.6005943 | -5.7621578 |
| H | -1.9942610 | 1.7865176  | -5.1818844 |
| H | -1.6901054 | -2.3569248 | -4.0075878 |
| H | -2.6181156 | 2.3869261  | -2.8458306 |
| H | -4.6530005 | 1.0192722  | 1.3067007  |
| H | -3.8889725 | -3.7430341 | 0.0800285  |
| H | -5.9041370 | -0.7789934 | 2.4903678  |
| H | -5.5291373 | -3.1721794 | 1.8644429  |
| H | -1.7654017 | 0.8123582  | -0.1329059 |
| H | -3.2290354 | 1.7058269  | -0.5789059 |
| H | -2.4239736 | -3.0186941 | -1.7535266 |
| H | -1.2894167 | -2.0329795 | -0.8138236 |

|    |           |            |           |
|----|-----------|------------|-----------|
| Fe | 4.3753654 | 9.3435691  | 3.0739493 |
| N  | 3.8809601 | 10.9614759 | 1.8085704 |
| O  | 2.7786474 | 8.9173661  | 3.4869516 |
| N  | 4.9737964 | 10.0130883 | 4.8395343 |

**$[\text{Fe}^{\text{IV}}(\text{O})\text{TMG}_2\text{dien}(\text{MeCN})]^{2+}\text{-DHA-TS } (\sigma)$**   
**E<sub>B3LYP-D3/def2-SVP(Fe:def2-TZVP)/COSMO( $\epsilon = 35.88$ ):</sub>**  
**-2985.8279795301 (<S<sup>2</sup>> 6.48039190)**

|   |           |            |           |
|---|-----------|------------|-----------|
| C | 6.2233615 | 10.7838150 | 4.8050529 |
| H | 6.6410591 | 10.8983291 | 5.8178030 |
| H | 6.0732900 | 11.7997888 | 4.4023256 |
| C | 7.1968298 | 10.0133290 | 3.9245572 |
| H | 8.1720611 | 10.5263360 | 3.8575337 |
| H | 7.3675445 | 9.0249946  | 4.3728266 |
| N | 6.6108747 | 9.8313056  | 2.5713036 |
| C | 7.1112000 | 8.6123970  | 1.8918799 |
| H | 8.2079132 | 8.5273741  | 1.9965843 |
| H | 6.8812390 | 8.7136502  | 0.8215031 |
| C | 6.4140870 | 7.3687562  | 2.4227773 |
| H | 6.7221675 | 6.4979264  | 1.8239371 |
| H | 6.7268171 | 7.1687499  | 3.4616010 |
| N | 4.9670296 | 7.5876397  | 2.3333637 |
| C | 4.2486979 | 9.9627154  | 5.9738294 |
| N | 4.0842659 | 11.0628744 | 6.7523217 |
| C | 4.0579059 | 12.4039703 | 6.1791152 |
| H | 3.9185220 | 12.3515555 | 5.0935306 |
| H | 4.9847462 | 12.9596064 | 6.3971437 |
| H | 3.2103870 | 12.9590436 | 6.6114104 |
| C | 3.9687653 | 11.0012759 | 8.2074180 |
| H | 4.2820517 | 10.0163193 | 8.5730447 |
| H | 2.9396885 | 11.2054295 | 8.5468019 |
| H | 4.6346458 | 11.7617154 | 8.6449577 |
| N | 3.6931837 | 8.7960440  | 6.3591935 |
| C | 2.4202152 | 8.7217759  | 7.0681539 |
| H | 1.9228403 | 9.6957299  | 7.0657557 |
| H | 2.5481475 | 8.3745254  | 8.1059146 |
| H | 1.7693112 | 8.0115179  | 6.5386554 |
| C | 4.2086444 | 7.5143740  | 5.8980565 |
| H | 5.2499076 | 7.6222870  | 5.5734108 |
| H | 3.6050936 | 7.1416009  | 5.0560511 |
| H | 4.1629467 | 6.7910996  | 6.7263621 |
| C | 6.8748381 | 11.0191568 | 1.7379760 |
| H | 7.9591531 | 11.1398919 | 1.5654568 |
| H | 6.4954530 | 11.9232549 | 2.2315138 |
| H | 6.3728735 | 10.9122151 | 0.7682500 |
| C | 4.1461945 | 6.5959084  | 1.9593315 |
| N | 4.4202773 | 5.2887459  | 2.2166277 |
| C | 5.1158908 | 4.8543794  | 3.4229366 |
| H | 5.1689189 | 5.6695253  | 4.1500948 |
| H | 6.1372666 | 4.5035316  | 3.2019396 |
| H | 4.5546534 | 4.0233327  | 3.8793634 |
| C | 4.0514096 | 4.2178718  | 1.2931534 |
| H | 3.7697857 | 4.6358426  | 0.3193497 |
| H | 3.2181274 | 3.6088755  | 1.6810263 |
| H | 4.9233744 | 3.5593913  | 1.1515483 |
| N | 3.0119299 | 6.8839780  | 1.2770271 |

**E**<sub>B3LYP-D3/def2-TZVPP/COSMO( $\epsilon = 35.88$ ):</sub>

**-2987.7176740604 (<S<sup>2</sup>> 6.47641129)**

**ZPE**<sub>B3LYP-D3/def2-SVP(Fe:def2-TZVP)/COSMO( $\epsilon = 35.88$ ):</sub>

**0.787387**

**Chem. Pot.**<sub>(298.15)/B3LYP-D3/def2-SVP(Fe:def2-</sub>

**TZVP)/COSMO( $\epsilon = 35.88$ ):**

**0.720003**

|                                                                                                                        |            |            |            |
|------------------------------------------------------------------------------------------------------------------------|------------|------------|------------|
| C                                                                                                                      | 1.7676531  | 6.1566571  | 1.5022069  |
| H                                                                                                                      | 1.8645139  | 5.4856480  | 2.3636537  |
| H                                                                                                                      | 1.4660405  | 5.5725093  | 0.6175428  |
| H                                                                                                                      | 0.9711654  | 6.8837809  | 1.7258146  |
| C                                                                                                                      | 2.8956810  | 8.0595072  | 0.4239609  |
| H                                                                                                                      | 3.8919592  | 8.4417623  | 0.1719725  |
| H                                                                                                                      | 2.3210203  | 8.8552614  | 0.9207437  |
| H                                                                                                                      | 2.3765205  | 7.7766054  | -0.5052271 |
| C                                                                                                                      | 3.6647968  | 11.8281047 | 1.0759266  |
| C                                                                                                                      | 3.4431009  | 12.9116668 | 0.1419095  |
| H                                                                                                                      | 2.6817327  | 12.6125576 | -0.5930592 |
| H                                                                                                                      | 3.0944696  | 13.8020491 | 0.6854406  |
| H                                                                                                                      | 4.3880352  | 13.1427953 | -0.3742495 |
| C                                                                                                                      | -0.4008820 | 10.8160194 | 0.0577751  |
| C                                                                                                                      | -0.0405944 | 12.1472876 | 0.3024065  |
| C                                                                                                                      | -0.3212862 | 9.8747723  | 1.0874212  |
| C                                                                                                                      | 0.4180288  | 12.5277298 | 1.5711706  |
| C                                                                                                                      | 0.1264550  | 10.2515359 | 2.3648113  |
| C                                                                                                                      | 0.5221779  | 11.5883269 | 2.6007300  |
| C                                                                                                                      | 0.2227605  | 9.2897903  | 3.4915155  |
| C                                                                                                                      | 1.0925262  | 11.9259359 | 3.9587976  |
| C                                                                                                                      | 0.3920111  | 11.1919986 | 5.0791723  |
| C                                                                                                                      | -0.0451310 | 9.8701984  | 4.8306290  |
| C                                                                                                                      | 0.1769623  | 11.7642404 | 6.3373636  |
| C                                                                                                                      | -0.7019669 | 9.1538327  | 5.8459683  |
| C                                                                                                                      | -0.4737861 | 11.0412494 | 7.3461545  |
| C                                                                                                                      | -0.9202270 | 9.7364163  | 7.0963252  |
| H                                                                                                                      | -0.7553548 | 10.5153562 | -0.9314569 |
| H                                                                                                                      | -0.1171697 | 12.8917475 | -0.4946272 |
| H                                                                                                                      | -0.6186466 | 8.8380822  | 0.9055813  |
| H                                                                                                                      | 0.7003378  | 13.5677709 | 1.7593357  |
| H                                                                                                                      | 0.5124384  | 12.7875273 | 6.5299446  |
| H                                                                                                                      | -1.0416663 | 8.1330923  | 5.6488222  |
| H                                                                                                                      | -0.6383032 | 11.4998825 | 8.3246489  |
| H                                                                                                                      | -1.4346209 | 9.1732070  | 7.8791900  |
| H                                                                                                                      | 2.1496784  | 11.5950575 | 3.9507635  |
| H                                                                                                                      | 1.1026560  | 13.0115022 | 4.1344016  |
| H                                                                                                                      | -0.2752185 | 8.3274288  | 3.3098201  |
| H                                                                                                                      | 1.4330769  | 9.0076992  | 3.5146695  |
| Fe                                                                                                                     | 1.1965026  | 0.6823128  | 0.2364298  |
| N                                                                                                                      | 0.4947346  | 2.2484576  | -0.9887124 |
| O                                                                                                                      | -0.0131880 | -0.5394677 | -0.3489013 |
| N                                                                                                                      | 0.5995574  | 0.9006264  | 2.1196818  |
| C                                                                                                                      | 1.1127522  | 2.0813877  | 2.8232547  |
| H                                                                                                                      | 0.9721820  | 1.9812047  | 3.9112802  |
| H                                                                                                                      | 0.5939054  | 3.0049953  | 2.5155617  |
| C                                                                                                                      | 2.5963770  | 2.1914647  | 2.4990198  |
| <b><math>[\text{Fe}^{\text{IV}}(\text{O})\text{TMG}_2\text{dien}(\text{MeCN})]^{2+}\text{-DHA-IC } (\sigma)</math></b> |            |            |            |
| <b>E<sub>B3LYP-D3/def2-SVP(Fe:def2-TZVP)/COSMO(<math>\epsilon = 35.88</math>):</sub></b>                               |            |            |            |
| <b>-2985.8627953930 (&lt;S<sup>2</sup>&gt; 7.04023782)</b>                                                             |            |            |            |
| <b>E<sub>B3LYP-D3/def2-TZVPP/COSMO(<math>\epsilon = 35.88</math>):</sub></b>                                           |            |            |            |
| <b>-2987.7538662395 (&lt;S<sup>2</sup>&gt; 7.03845116)</b>                                                             |            |            |            |



|   |            |            |            |
|---|------------|------------|------------|
| H | 3.0518454  | 3.0597020  | 3.0073168  |
| H | 3.1012997  | 1.2876974  | 2.8664434  |
| N | 2.7892891  | 2.2854304  | 1.0307762  |
| C | 4.0943507  | 1.7417791  | 0.5934714  |
| H | 4.9154132  | 2.1298608  | 1.2241297  |
| H | 4.2680653  | 2.0887560  | -0.4356304 |
| C | 4.0850337  | 0.2183931  | 0.5976222  |
| H | 5.0288984  | -0.1481054 | 0.1651274  |
| H | 4.0413086  | -0.1603073 | 1.6327433  |
| N | 2.9324611  | -0.2341510 | -0.1858794 |
| C | -0.3959133 | 0.1690884  | 2.6568521  |
| N | -1.4400345 | 0.7560746  | 3.2950604  |
| C | -1.9161467 | 2.0797370  | 2.9088122  |
| H | -1.5587117 | 2.3326720  | 1.9027786  |
| H | -1.5886225 | 2.8592887  | 3.6162784  |
| H | -3.0163434 | 2.0693042  | 2.8930918  |
| C | -2.1368567 | 0.1373076  | 4.4205718  |
| H | -1.5626257 | -0.7165120 | 4.7994138  |
| H | -3.1477294 | -0.2006783 | 4.1383739  |
| H | -2.2315901 | 0.8805673  | 5.2280631  |
| N | -0.3541417 | -1.1770243 | 2.5671240  |
| C | -1.5516743 | -1.9866868 | 2.3697571  |
| H | -2.4307148 | -1.3486053 | 2.2509385  |
| H | -1.7138545 | -2.6825022 | 3.2080989  |
| H | -1.4304650 | -2.5662069 | 1.4418139  |
| C | 0.8998157  | -1.8897341 | 2.3648649  |
| H | 1.7417111  | -1.2745535 | 2.7030761  |
| H | 1.0321135  | -2.1366058 | 1.2993646  |
| H | 0.8789157  | -2.8228224 | 2.9483685  |
| C | 2.6358836  | 3.6784978  | 0.5789466  |
| H | 3.4209520  | 4.3226708  | 1.0149442  |
| H | 1.6548811  | 4.0704139  | 0.8785242  |
| H | 2.7098593  | 3.7254185  | -0.5150269 |
| C | 3.0365438  | -1.2995842 | -0.9942220 |
| N | 3.8528496  | -2.3491335 | -0.7126106 |
| C | 4.1244725  | -2.7847276 | 0.6529532  |
| H | 3.4147599  | -2.3274338 | 1.3486137  |
| H | 5.1500859  | -2.5308437 | 0.9670746  |
| H | 4.0047571  | -3.8784011 | 0.7089199  |
| C | 4.5341997  | -3.1119809 | -1.7564464 |
| H | 4.4869080  | -2.5753768 | -2.7114895 |
| H | 4.0982047  | -4.1167178 | -1.8828291 |
| H | 5.5924905  | -3.2278802 | -1.4729883 |
| N | 2.3210578  | -1.3423567 | -2.1453153 |
| C | 1.7103374  | -2.5748623 | -2.6318702 |
| H | 1.8049496  | -3.3714316 | -1.8848218 |
| H | 2.1597851  | -2.9105446 | -3.5807995 |
| H | 0.6376689  | -2.3896931 | -2.8012358 |

**ZPE**<sub>B3LYP-D3/def2-SVP(Fe:def2-TZVP)/COSMO( $\epsilon = 35.88$ ):</sub>

**0.789606**

**Chem. Pot.**<sub>(298.15)/B3LYP-D3/def2-SVP(Fe:def2-</sub>

**TZVP)/COSMO( $\epsilon = 35.88$ ):**

**0.720699**

|   |            |            |            |
|---|------------|------------|------------|
| C | 1.9542856  | -0.1387651 | -2.8795680 |
| H | 2.5559027  | 0.7109489  | -2.5361600 |
| H | 0.8879347  | 0.1008712  | -2.7511856 |
| H | 2.1438926  | -0.3007085 | -3.9526212 |
| C | 0.1428601  | 3.0898859  | -1.6977100 |
| C | -0.2784657 | 4.1508851  | -2.5867207 |
| H | -0.3409242 | 3.7642723  | -3.6153376 |
| H | -1.2629737 | 4.5290440  | -2.2719304 |
| H | 0.4552100  | 4.9711498  | -2.5500118 |
| C | -1.4575658 | -0.5769421 | -4.4928002 |
| C | -1.6369244 | 0.7938808  | -4.2398823 |
| C | -1.8975479 | -1.5161584 | -3.5674297 |
| C | -2.2339486 | 1.2057656  | -3.0423119 |
| C | -2.5141809 | -1.1139995 | -2.3495744 |
| C | -2.6515439 | 0.2823419  | -2.0803638 |
| C | -3.0211875 | -2.0711320 | -1.4178457 |
| C | -3.1699304 | 0.7455751  | -0.7398955 |
| C | -3.8830127 | -0.3033270 | 0.0807362  |
| C | -3.7534077 | -1.6839793 | -0.2548205 |
| C | -4.6182246 | 0.0596987  | 1.2125358  |
| C | -4.3706486 | -2.6517918 | 0.5827816  |
| C | -5.2184124 | -0.9071222 | 2.0297668  |
| C | -5.0887030 | -2.2697033 | 1.7098483  |
| H | -0.9827322 | -0.9050802 | -5.4208644 |
| H | -1.3134433 | 1.5351138  | -4.9752357 |
| H | -1.7868202 | -2.5844810 | -3.7732093 |
| H | -2.3855496 | 2.2712916  | -2.8504675 |
| H | -4.7241280 | 1.1194311  | 1.4625772  |
| H | -4.2683046 | -3.7105269 | 0.3286577  |
| H | -5.7864015 | -0.6002394 | 2.9116154  |
| H | -5.5523788 | -3.0279786 | 2.3461244  |
| H | -2.2947160 | 1.0942911  | -0.1531694 |
| H | -3.8063335 | 1.6380981  | -0.8608613 |
| H | -2.9048644 | -3.1352305 | -1.6396109 |
| H | -0.6473454 | -0.6703819 | -1.0659405 |

**[Fe<sup>IV</sup>(O)TMG<sub>2</sub>dien(MeCN)]<sup>2+</sup> ( $\pi$ ) pathway**

|    |            |            |            |
|----|------------|------------|------------|
| Fe | 0.2332221  | 0.5161617  | 0.5395806  |
| N  | -1.2133050 | -0.5579767 | 1.6335486  |
| O  | -0.4531600 | 0.2009692  | -0.9034446 |
| N  | 1.7505529  | -0.6901609 | 0.3308932  |
| C  | 2.5590672  | -0.8304180 | 1.5503829  |
| H  | 3.5710466  | -1.1928449 | 1.3111736  |
| H  | 2.1201434  | -1.5470904 | 2.2640380  |
| C  | 2.6329621  | 0.5506173  | 2.1774311  |
| H  | 3.1879340  | 0.5426456  | 3.1299896  |
| H  | 3.1483585  | 1.2306635  | 1.4856776  |

**[Fe<sup>IV</sup>(O)TMG<sub>2</sub>dien(MeCN)]<sup>2+</sup>-CHD-RC ( $\pi$ )**

**E**<sub>B3LYP-D3/def2-SVP(Fe:def2-TZVP)/COSMO( $\epsilon$  = 35.88):</sub>

**-2678.9124553028 (<S<sup>2</sup>> 6.05188503)**

**E**<sub>B3LYP-D3/def2-TZVPP/COSMO( $\epsilon$  = 35.88):</sub>

**-2680.4812635465 (<S<sup>2</sup>> 6.05421978)**

**ZPE**<sub>B3LYP-D3/def2-SVP(Fe:def2-TZVP)/COSMO( $\epsilon$  = 35.88):</sub>

|   |            |            |            |
|---|------------|------------|------------|
| N | 1.2464404  | 1.0602929  | 2.3946654  |
| C | 1.2053385  | 2.5493285  | 2.4767512  |
| H | 2.0358547  | 2.9202192  | 3.1004893  |
| H | 0.2596459  | 2.8247575  | 2.9633907  |
| C | 1.2332162  | 3.1426807  | 1.0813972  |
| H | 1.0443440  | 4.2261110  | 1.1293461  |
| H | 2.2284019  | 3.0089333  | 0.6256222  |
| N | 0.1876189  | 2.4569180  | 0.3127937  |
| C | 1.9996823  | -1.4959963 | -0.7251508 |
| N | 2.2800232  | -2.8090634 | -0.5379263 |
| C | 1.6836601  | -3.5597313 | 0.5623178  |
| H | 0.8060679  | -3.0267022 | 0.9473821  |
| H | 2.4036372  | -3.7299032 | 1.3796409  |
| H | 1.3546790  | -4.5398166 | 0.1848567  |
| C | 3.2339063  | -3.5477239 | -1.3633953 |
| H | 3.8266604  | -2.8554373 | -1.9727850 |
| H | 2.7319956  | -4.2756799 | -2.0214835 |
| H | 3.9188570  | -4.0976017 | -0.6988192 |
| N | 2.0046507  | -0.9863318 | -1.9717603 |
| C | 1.6254602  | -1.7606284 | -3.1499818 |
| H | 1.1663987  | -2.7098484 | -2.8558863 |
| H | 2.4910886  | -1.9615413 | -3.8010230 |
| H | 0.8861255  | -1.1812522 | -3.7245108 |
| C | 2.2588104  | 0.4270505  | -2.2267269 |
| H | 2.7211762  | 0.8880437  | -1.3465837 |
| H | 1.3187611  | 0.9512578  | -2.4554848 |
| H | 2.9438359  | 0.5181058  | -3.0837111 |
| C | 0.6849238  | 0.4861305  | 3.6395486  |
| H | 1.2658549  | 0.8350290  | 4.5094581  |
| H | 0.7200017  | -0.6089653 | 3.6046426  |
| H | -0.3582634 | 0.8033431  | 3.7532519  |
| C | -0.5221837 | 3.1099396  | -0.6246839 |
| N | 0.0126788  | 4.1221669  | -1.3523369 |
| C | 1.4180840  | 4.1399115  | -1.7452304 |
| H | 1.8648232  | 3.1501932  | -1.6068266 |
| H | 1.9950060  | 4.8818682  | -1.1695059 |
| H | 1.4846679  | 4.4004911  | -2.8132208 |
| C | -0.7740819 | 5.2756646  | -1.7854144 |
| H | -1.7275367 | 5.3089156  | -1.2448595 |
| H | -0.9714130 | 5.2541295  | -2.8696861 |
| H | -0.2087672 | 6.1924205  | -1.5543951 |
| N | -1.8131131 | 2.7723394  | -0.8372239 |
| C | -2.4078618 | 2.7768597  | -2.1707110 |
| H | -1.6382422 | 2.9443682  | -2.9329972 |
| H | -3.1907754 | 3.5463727  | -2.2668474 |
| H | -2.8614274 | 1.7895213  | -2.3534855 |
| C | -2.6420382 | 2.1883886  | 0.2088845  |
| H | -2.1954508 | 2.3728893  | 1.1927192  |

**0.698061**

**Chem. Pot.**(298.15)/B3LYP-D3/def2-SVP(Fe:def2-

TZVP)/COSMO( $\epsilon = 35.88$ ):

**0.634122**

|    |            |            |            |                                                                                             |
|----|------------|------------|------------|---------------------------------------------------------------------------------------------|
| H  | -2.7492711 | 1.1027335  | 0.0654072  |                                                                                             |
| H  | -3.6405031 | 2.6507341  | 0.1733159  |                                                                                             |
| C  | -1.9680213 | -1.1778934 | 2.2506221  |                                                                                             |
| C  | -2.8922985 | -1.9278100 | 3.0760689  |                                                                                             |
| H  | -3.9195144 | -1.7723114 | 2.7163496  |                                                                                             |
| H  | -2.6495499 | -2.9988642 | 3.0180924  |                                                                                             |
| H  | -2.8068346 | -1.5832069 | 4.1185062  |                                                                                             |
| C  | -1.2313077 | -3.6733301 | -1.2606446 |                                                                                             |
| C  | -1.9520566 | -4.4750352 | -0.2081869 |                                                                                             |
| C  | -3.2419613 | -3.8364594 | 0.2370905  |                                                                                             |
| C  | -3.6852300 | -2.6610539 | -0.2309807 |                                                                                             |
| C  | -2.9425449 | -1.8434004 | -1.2524162 |                                                                                             |
| C  | -1.6741868 | -2.4979289 | -1.7244160 |                                                                                             |
| H  | -0.2985340 | -4.0964966 | -1.6490868 |                                                                                             |
| H  | -3.8322433 | -4.3815449 | 0.9824188  |                                                                                             |
| H  | -4.6359702 | -2.2561312 | 0.1349679  |                                                                                             |
| H  | -1.0999625 | -1.9521431 | -2.4765489 |                                                                                             |
| H  | -2.6910451 | -0.8480051 | -0.8399908 |                                                                                             |
| H  | -3.6015834 | -1.6233357 | -2.1155382 |                                                                                             |
| H  | -2.1484593 | -5.5011770 | -0.5776821 |                                                                                             |
| H  | -1.2892432 | -4.6323882 | 0.6673864  |                                                                                             |
| Fe | 0.4056101  | 0.6590079  | 0.5594121  | <b>[Fe<sup>IV</sup>(O)TMG<sub>2</sub>dien(MeCN)]<sup>2+</sup>-CHD-TS (<math>\pi</math>)</b> |
| N  | -0.4651455 | -0.3920442 | 2.1430184  | <b>E<sub>B3LYP-D3/def2-SVP(Fe:def2-TZVP)/COSMO(<math>\epsilon</math> = 35.88):</sub></b>    |
| O  | -0.7186543 | 0.1106939  | -0.6065010 | <b>-2678.8928803855 (&lt;S<sup>2</sup>&gt; 6.06219379)</b>                                  |
| N  | 1.9240975  | -0.4688210 | -0.0031066 | <b>E<sub>B3LYP-D3/def2-TZVPP/COSMO(<math>\epsilon</math> = 35.88):</sub></b>                |
| C  | 3.0094800  | -0.4336800 | 0.9836119  | <b>-2680.4600743158 (&lt;S<sup>2</sup>&gt; 6.06368298)</b>                                  |
| H  | 3.9516697  | -0.8108847 | 0.5558522  | <b>ZPE<sub>B3LYP-D3/def2-SVP(Fe:def2-TZVP)/COSMO(<math>\epsilon</math> = 35.88):</sub></b>  |
| H  | 2.7870424  | -1.0525576 | 1.8694601  | <b>0.691699</b>                                                                             |
| C  | 3.1689458  | 1.0240828  | 1.3872765  | <b>Chem. Pot.(298.15)/B3LYP-D3/def2-SVP(Fe:def2-</b>                                        |
| H  | 3.9568620  | 1.1601226  | 2.1466943  | <b>TZVP)/COSMO(<math>\epsilon</math> = 35.88):</b>                                          |
| H  | 3.4433633  | 1.6095184  | 0.4991779  | <b>0.62848</b>                                                                              |
| N  | 1.8655101  | 1.5356433  | 1.9056099  |                                                                                             |
| C  | 1.7472306  | 3.0161171  | 1.7600966  |                                                                                             |
| H  | 2.7058590  | 3.5023316  | 2.0073264  |                                                                                             |
| H  | 0.9940098  | 3.3583314  | 2.4831006  |                                                                                             |
| C  | 1.2736549  | 3.3637050  | 0.3610308  |                                                                                             |
| H  | 1.0419656  | 4.4383333  | 0.3030127  |                                                                                             |
| H  | 2.0702436  | 3.1646790  | -0.3761604 |                                                                                             |
| N  | 0.0871241  | 2.5421373  | 0.1052712  |                                                                                             |
| C  | 2.0135075  | -1.3058991 | -1.0503448 |                                                                                             |
| N  | 2.5253893  | -2.5571376 | -0.8942390 |                                                                                             |
| C  | 2.2998103  | -3.3066397 | 0.3356313  |                                                                                             |
| H  | 1.4849638  | -2.8477900 | 0.9090994  |                                                                                             |
| H  | 3.2049176  | -3.3518528 | 0.9643040  |                                                                                             |
| H  | 2.0078793  | -4.3371413 | 0.0774285  |                                                                                             |
| C  | 3.3821842  | -3.2033535 | -1.8845987 |                                                                                             |
| H  | 3.6993060  | -2.4794396 | -2.6446782 |                                                                                             |

|   |            |            |            |
|---|------------|------------|------------|
| H | 2.8782149  | -4.0509287 | -2.3780881 |
| H | 4.2825615  | -3.5860295 | -1.3771419 |
| N | 1.6293576  | -0.9006318 | -2.2777578 |
| C | 1.1408769  | -1.8150532 | -3.3044847 |
| H | 0.9361847  | -2.8006368 | -2.8747585 |
| H | 1.8622021  | -1.9184297 | -4.1311443 |
| H | 0.2015181  | -1.4129487 | -3.7145076 |
| C | 1.5451460  | 0.5113211  | -2.6287513 |
| H | 2.1507451  | 1.1047015  | -1.9340127 |
| H | 0.5011394  | 0.8547278  | -2.5752338 |
| H | 1.9285663  | 0.6508540  | -3.6510722 |
| C | 1.7179656  | 1.1743516  | 3.3344057  |
| H | 2.4710338  | 1.7083947  | 3.9377914  |
| H | 1.8552874  | 0.0952889  | 3.4702020  |
| H | 0.7152173  | 1.4492589  | 3.6831748  |
| C | -0.9668510 | 3.0304232  | -0.5603112 |
| N | -0.8400744 | 3.9953636  | -1.5106490 |
| C | 0.3182580  | 4.0772717  | -2.3930501 |
| H | 0.9095853  | 3.1587982  | -2.3340966 |
| H | 0.9628509  | 4.9367057  | -2.1454700 |
| H | -0.0308972 | 4.1937926  | -3.4315930 |
| C | -1.8536120 | 5.0275892  | -1.7148678 |
| H | -2.5579956 | 5.0391496  | -0.8744943 |
| H | -2.4126889 | 4.8747786  | -2.6530186 |
| H | -1.3538483 | 6.0082993  | -1.7670128 |
| N | -2.2129485 | 2.5852337  | -0.2708214 |
| C | -3.2103551 | 2.3600642  | -1.3117823 |
| H | -2.7753864 | 2.5270528  | -2.3038105 |
| H | -4.0881109 | 3.0143322  | -1.1842569 |
| H | -3.5436338 | 1.3104802  | -1.2595026 |
| C | -2.5565154 | 2.0463783  | 1.0362235  |
| H | -1.8318603 | 2.3834552  | 1.7871717  |
| H | -2.5642378 | 0.9454384  | 1.0204055  |
| H | -3.5586117 | 2.4043552  | 1.3192970  |
| C | -0.9261835 | -1.0042624 | 3.0069616  |
| C | -1.4979246 | -1.7641789 | 4.0987865  |
| H | -2.5902737 | -1.8185349 | 3.9785573  |
| H | -1.0781892 | -2.7812694 | 4.0963337  |
| H | -1.2585905 | -1.2729822 | 5.0544731  |
| C | -1.1084659 | -4.0501765 | -0.9194788 |
| C | -1.3480777 | -4.4825301 | 0.4993081  |
| C | -2.2824115 | -3.5776898 | 1.2506383  |
| C | -2.7289658 | -2.4086870 | 0.7453952  |
| C | -2.3180118 | -1.9189530 | -0.5824321 |
| C | -1.5910751 | -2.8922790 | -1.4156267 |
| H | -0.5427644 | -4.7307912 | -1.5644773 |
| H | -2.6125583 | -3.9103950 | 2.2399097  |
| H | -3.4159495 | -1.7873336 | 1.3295721  |

|    |            |            |            |                                                                                             |
|----|------------|------------|------------|---------------------------------------------------------------------------------------------|
| H  | -1.4233489 | -2.6323317 | -2.4631069 |                                                                                             |
| H  | -1.5032757 | -0.9525114 | -0.4556075 |                                                                                             |
| H  | -3.0916522 | -1.3449551 | -1.1168569 |                                                                                             |
| H  | -1.7306705 | -5.5224851 | 0.5186028  |                                                                                             |
| H  | -0.3819214 | -4.5590210 | 1.0424449  |                                                                                             |
| Fe | 0.2575793  | 0.4910479  | 0.6374487  | <b>[Fe<sup>IV</sup>(O)TMG<sub>2</sub>dien(MeCN)]<sup>2+</sup>-CHD-IC (<math>\pi</math>)</b> |
| N  | -1.1288167 | -0.6683211 | 1.7057837  | <b>E<sub>B3LYP-D3/def2-SVP(Fe:def2-TZVP)/COSMO(<math>\epsilon</math> = 35.88):</sub></b>    |
| O  | -0.5428539 | 0.1463387  | -0.9332727 | <b>-2678.9331937799 (&lt;S<sup>2</sup>&gt; 6.08368116)</b>                                  |
| N  | 1.7596037  | -0.7694925 | 0.4006762  | <b>E<sub>B3LYP-D3/def2-TZVPP/COSMO(<math>\epsilon</math> = 35.88):</sub></b>                |
| C  | 2.5174245  | -0.9187666 | 1.6467992  | <b>-2680.5021632039 (&lt;S<sup>2</sup>&gt; 6.08275989)</b>                                  |
| H  | 3.5178865  | -1.3402415 | 1.4605359  | <b>ZPE<sub>B3LYP-D3/def2-SVP(Fe:def2-TZVP)/COSMO(<math>\epsilon</math> = 35.88):</sub></b>  |
| H  | 2.0140519  | -1.5867783 | 2.3656806  | <b>0.695919</b>                                                                             |
| C  | 2.6434879  | 0.4803263  | 2.2305225  | <b>Chem. Pot.(298.15)/B3LYP-D3/def2-SVP(Fe:def2-</b>                                        |
| H  | 3.1734745  | 0.4829448  | 3.1969844  | <b>TZVP)/COSMO(<math>\epsilon</math> = 35.88):</b>                                          |
| H  | 3.2045640  | 1.1107273  | 1.5273674  | <b>0.631999</b>                                                                             |
| N  | 1.2780891  | 1.0691604  | 2.4002573  |                                                                                             |
| C  | 1.3154802  | 2.5646449  | 2.4159601  |                                                                                             |
| H  | 2.1896225  | 2.9160703  | 2.9882691  |                                                                                             |
| H  | 0.4074798  | 2.9091362  | 2.9293821  |                                                                                             |
| C  | 1.3046451  | 3.0920168  | 0.9934444  |                                                                                             |
| H  | 1.1635864  | 4.1838684  | 0.9997044  |                                                                                             |
| H  | 2.2722291  | 2.8935793  | 0.5015837  |                                                                                             |
| N  | 0.2022807  | 2.4069623  | 0.3118378  |                                                                                             |
| C  | 2.0474014  | -1.5393992 | -0.6600865 |                                                                                             |
| N  | 2.3711051  | -2.8514513 | -0.5048305 |                                                                                             |
| C  | 1.7917344  | -3.6488230 | 0.5699227  |                                                                                             |
| H  | 0.9079434  | -3.1437424 | 0.9782453  |                                                                                             |
| H  | 2.5126562  | -3.8295335 | 1.3844809  |                                                                                             |
| H  | 1.4801105  | -4.6245730 | 0.1645102  |                                                                                             |
| C  | 3.3611834  | -3.5314197 | -1.3366901 |                                                                                             |
| H  | 3.9237778  | -2.8016146 | -1.9310440 |                                                                                             |
| H  | 2.8959440  | -4.2683033 | -2.0121085 |                                                                                             |
| H  | 4.0690008  | -4.0631920 | -0.6807383 |                                                                                             |
| N  | 2.0394968  | -1.0112324 | -1.9028924 |                                                                                             |
| C  | 1.6602759  | -1.7736206 | -3.0876349 |                                                                                             |
| H  | 1.2368437  | -2.7428907 | -2.8034711 |                                                                                             |
| H  | 2.5181920  | -1.9386982 | -3.7590814 |                                                                                             |
| H  | 0.8933995  | -1.2068749 | -3.6390125 |                                                                                             |
| C  | 2.2414386  | 0.4139830  | -2.1328686 |                                                                                             |
| H  | 2.7122034  | 0.8700038  | -1.2540224 |                                                                                             |
| H  | 1.2763837  | 0.9076095  | -2.3190882 |                                                                                             |
| H  | 2.9013366  | 0.5462768  | -3.0042009 |                                                                                             |
| C  | 0.6769157  | 0.5855481  | 3.6664230  |                                                                                             |
| H  | 1.2441405  | 0.9814587  | 4.5247377  |                                                                                             |
| H  | 0.6948169  | -0.5095634 | 3.7015270  |                                                                                             |
| H  | -0.3634257 | 0.9260364  | 3.7330521  |                                                                                             |
| C  | -0.5646580 | 3.0380602  | -0.5863988 |                                                                                             |

|   |            |            |            |
|---|------------|------------|------------|
| N | -0.0863667 | 4.0513836  | -1.3578054 |
| C | 1.2899120  | 4.0836459  | -1.8390223 |
| H | 1.7666976  | 3.1087244  | -1.6989437 |
| H | 1.8871781  | 4.8540023  | -1.3238660 |
| H | 1.2866385  | 4.3114387  | -2.9170445 |
| C | -0.9151914 | 5.1852342  | -1.7592712 |
| H | -1.8431177 | 5.2018083  | -1.1750421 |
| H | -1.1653088 | 5.1517240  | -2.8328250 |
| H | -0.3598337 | 6.1167320  | -1.5635869 |
| N | -1.8677513 | 2.6975486  | -0.7217597 |
| C | -2.5080211 | 2.6230508  | -2.0309200 |
| H | -1.7873142 | 2.8459247  | -2.8257200 |
| H | -3.3600351 | 3.3180662  | -2.1060367 |
| H | -2.8725436 | 1.5939113  | -2.1837018 |
| C | -2.6215039 | 2.0824134  | 0.3600525  |
| H | -2.1400022 | 2.2905243  | 1.3233199  |
| H | -2.6883973 | 0.9922711  | 0.2200436  |
| H | -3.6389842 | 2.5035433  | 0.3712357  |
| C | -1.8983473 | -1.2692715 | 2.3239431  |
| C | -2.8440567 | -1.9970365 | 3.1451795  |
| H | -3.8662653 | -1.8208912 | 2.7804134  |
| H | -2.6191309 | -3.0730556 | 3.1029380  |
| H | -2.7594142 | -1.6493295 | 4.1867012  |
| C | -1.3027690 | -3.5360613 | -1.3057700 |
| C | -2.0402208 | -4.0580134 | -0.1071632 |
| C | -3.3528009 | -3.3709412 | 0.1380746  |
| C | -3.7949188 | -2.3390115 | -0.6494766 |
| C | -3.0396415 | -1.8855390 | -1.7663569 |
| C | -1.8030487 | -2.5195849 | -2.0794453 |
| H | -0.3526936 | -4.0118673 | -1.5647912 |
| H | -3.9643484 | -3.7275411 | 0.9713402  |
| H | -4.7541332 | -1.8618020 | -0.4267850 |
| H | -1.2442583 | -2.1821676 | -2.9561482 |
| H | -0.9067859 | -0.7537071 | -0.9615449 |
| H | -3.4075348 | -1.0654829 | -2.3862694 |
| H | -2.1943320 | -5.1551301 | -0.2046380 |
| H | -1.3959347 | -3.9926924 | 0.7995783  |

|    |           |            |            |
|----|-----------|------------|------------|
| Fe | 1.2513539 | 0.8269348  | 0.3732368  |
| N  | 0.1555888 | 2.3978191  | -0.5031940 |
| O  | 0.2605622 | -0.3486169 | -0.1689369 |
| N  | 0.7947884 | 0.5966206  | 2.2415925  |
| C  | 1.3707516 | 1.6087150  | 3.1380776  |
| H  | 1.4305125 | 1.2296980  | 4.1703270  |
| H  | 0.7728820 | 2.5350326  | 3.1682377  |
| C  | 2.7647197 | 1.8945415  | 2.6045120  |
| H  | 3.2742065 | 2.6870044  | 3.1768422  |
| H  | 3.3679910 | 0.9792159  | 2.6734873  |

**$[Fe^{IV}(O)TMG_2dien(MeCN)]^{2+}$ -DHA-RC ( $\pi$ )**

**E**<sub>B3LYP-D3/def2-SVP(Fe:def2-TZVP)/COSMO( $\epsilon$  = 35.88):</sub>

**-2985.8471964201 (<S<sup>2</sup>> 6.05268463)**

**E**<sub>B3LYP-D3/def2-TZVPP/COSMO( $\epsilon$  = 35.88):</sub>

**-2987.7376292103 (<S<sup>2</sup>> 6.05485736)**

**ZPE**<sub>B3LYP-D3/def2-SVP(Fe:def2-TZVP)/COSMO( $\epsilon$  = 35.88):</sub>

**0.79455**

|   |            |            |            |
|---|------------|------------|------------|
| N | 2.6609756  | 2.2845744  | 1.1661873  |
| C | 3.9362432  | 2.0660697  | 0.4240622  |
| H | 4.7912064  | 2.4317678  | 1.0171167  |
| H | 3.8797041  | 2.6573810  | -0.5001279 |
| C | 4.0860824  | 0.6002752  | 0.0645950  |
| H | 4.9426912  | 0.4677277  | -0.6139656 |
| H | 4.2975770  | 0.0056091  | 0.9684334  |
| N | 2.8333073  | 0.1808877  | -0.5780306 |
| C | -0.0932464 | -0.3044019 | 2.7314751  |
| N | -1.1127702 | 0.1041490  | 3.5218612  |
| C | -1.6958124 | 1.4344648  | 3.3711623  |
| H | -1.4084661 | 1.8672775  | 2.4054208  |
| H | -1.3817145 | 2.1099761  | 4.1836494  |
| H | -2.7922116 | 1.3444076  | 3.4006068  |
| C | -1.6693997 | -0.7058325 | 4.6045424  |
| H | -1.0003751 | -1.5421885 | 4.8379056  |
| H | -2.6688602 | -1.0945966 | 4.3506069  |
| H | -1.7591156 | -0.0730091 | 5.5011316  |
| N | 0.0605451  | -1.6090617 | 2.4454090  |
| C | -1.0567845 | -2.5434557 | 2.3354751  |
| H | -2.0096602 | -2.0085229 | 2.3372026  |
| H | -1.0451375 | -3.2859460 | 3.1486843  |
| H | -0.9696128 | -3.0738688 | 1.3760104  |
| C | 1.3502778  | -2.1587377 | 2.0432898  |
| H | 2.1591397  | -1.4817139 | 2.3393312  |
| H | 1.3795974  | -2.2998669 | 0.9521106  |
| H | 1.4929665  | -3.1313103 | 2.5379785  |
| C | 2.2712144  | 3.7106960  | 1.0637213  |
| H | 3.0423485  | 4.3442395  | 1.5324114  |
| H | 1.3125763  | 3.8824801  | 1.5673953  |
| H | 2.1725568  | 3.9913774  | 0.0095138  |
| C | 2.8397041  | -0.7570464 | -1.5437492 |
| N | 3.7803599  | -1.7372325 | -1.5794297 |
| C | 4.3169932  | -2.3514424 | -0.3694005 |
| H | 3.6983421  | -2.0951329 | 0.4964806  |
| H | 5.3564136  | -2.0391675 | -0.1769418 |
| H | 4.3000103  | -3.4462978 | -0.4895959 |
| C | 4.3297153  | -2.2456839 | -2.8349830 |
| H | 4.0659219  | -1.5769267 | -3.6629915 |
| H | 3.9692810  | -3.2627902 | -3.0603669 |
| H | 5.4275509  | -2.2785631 | -2.7493211 |
| N | 1.9096327  | -0.7259892 | -2.5221113 |
| C | 1.3634488  | -1.9477684 | -3.1063524 |
| H | 1.6643739  | -2.8229082 | -2.5190189 |
| H | 1.6840177  | -2.0820831 | -4.1521304 |
| H | 0.2657866  | -1.8782225 | -3.0857892 |
| C | 1.2572358  | 0.5054733  | -2.9530716 |
| H | 1.8244125  | 1.3735733  | -2.5987358 |

**Chem. Pot.**(298.15)/B3LYP-D3/def2-SVP(Fe: def2-

TZVP)/COSMO( $\epsilon = 35.88$ ):

**0.727264**



|   |            |            |            |
|---|------------|------------|------------|
| H | 0.2294297  | 0.5596811  | -2.5656272 |
| H | 1.2234183  | 0.5217979  | -4.0534833 |
| C | -0.3671640 | 3.2624655  | -1.0627316 |
| C | -0.9822954 | 4.3687590  | -1.7655031 |
| H | -1.1874064 | 4.0727692  | -2.8050866 |
| H | -1.9238857 | 4.6470853  | -1.2689196 |
| H | -0.2968116 | 5.2304434  | -1.7559668 |
| C | -2.3858366 | 0.3658038  | -4.4617920 |
| C | -2.7173596 | 1.5823625  | -3.8554566 |
| C | -2.2583067 | -0.7870599 | -3.6788827 |
| C | -2.9072953 | 1.6361811  | -2.4698514 |
| C | -2.4287547 | -0.7347721 | -2.2883633 |
| C | -2.7453461 | 0.4935743  | -1.6758551 |
| C | -2.2707911 | -1.9596109 | -1.4152455 |
| C | -2.8779247 | 0.5416986  | -0.1707571 |
| C | -3.4931913 | -0.7178188 | 0.3964819  |
| C | -3.2076084 | -1.9482176 | -0.2270471 |
| C | -4.3084332 | -0.6937951 | 1.5369248  |
| C | -3.7539424 | -3.1284679 | 0.2956399  |
| C | -4.8321535 | -1.8783909 | 2.0672460  |
| C | -4.5566139 | -3.0999876 | 1.4412228  |
| H | -2.2420512 | 0.3103020  | -5.5441313 |
| H | -2.8425517 | 2.4845008  | -4.4608420 |
| H | -2.0254581 | -1.7438747 | -4.1560103 |
| H | -3.1975858 | 2.5781346  | -1.9964499 |
| H | -4.5364570 | 0.2635690  | 2.0150053  |
| H | -3.5355115 | -4.0831243 | -0.1924146 |
| H | -5.4610128 | -1.8460153 | 2.9610112  |
| H | -4.9680193 | -4.0295929 | 1.8435994  |
| H | -1.8565479 | 0.6384497  | 0.2423758  |
| H | -3.4372227 | 1.4336124  | 0.1502340  |
| H | -2.3930397 | -2.8812919 | -2.0043990 |
| H | -1.2334752 | -1.9637288 | -1.0268089 |

|    |           |            |            |
|----|-----------|------------|------------|
| Fe | 1.7525801 | 0.5343741  | 0.2757682  |
| N  | 0.7580960 | 2.1833744  | -0.5474474 |
| O  | 0.4765436 | -0.5763362 | -0.0152960 |
| N  | 1.4058162 | 0.7858405  | 2.2021017  |
| C  | 2.1976129 | 1.8807149  | 2.7718327  |
| H  | 2.2318825 | 1.8191077  | 3.8710036  |
| H  | 1.7868469 | 2.8730142  | 2.5184726  |
| C  | 3.5956497 | 1.7324472  | 2.1956748  |
| H  | 4.2734055 | 2.5319542  | 2.5378542  |
| H  | 4.0114545 | 0.7678744  | 2.5167960  |
| N  | 3.5129882 | 1.7360115  | 0.7044711  |
| C  | 4.6739343 | 1.0295482  | 0.0872075  |
| H  | 5.6010508 | 1.2727890  | 0.6325531  |
| H  | 4.7760528 | 1.3979035  | -0.9427852 |

**[Fe<sup>IV</sup>(O)TMG<sub>2</sub>dien(MeCN)]<sup>2+</sup>-DHA-TS ( $\pi$ )**

**E<sub>B3LYP-D3/def2-SVP(Fe:def2-TZVP)/COSMO( $\epsilon$  = 35.88):</sub>**

**-2985.8205751957 (<S<sup>2</sup>> 6.06140423)**

**E<sub>B3LYP-D3/def2-TZVPP/COSMO( $\epsilon$  = 35.88):</sub>**

**-2987.7100429454 (<S<sup>2</sup>> 6.06299607)**

**ZPE<sub>B3LYP-D3/def2-SVP(Fe:def2-TZVP)/COSMO( $\epsilon$  = 35.88):</sub>**

**0.787135**

**Chem. Pot.<sub>(298.15)/B3LYP-D3/def2-SVP(Fe:def2-</sub>**

**TZVP)/COSMO( $\epsilon$  = 35.88):**

|   |            |            |            |
|---|------------|------------|------------|
| C | 4.4048884  | -0.4626168 | 0.0471124  |
| H | 5.1911313  | -0.9676559 | -0.5344713 |
| H | 4.4288929  | -0.8898413 | 1.0641408  |
| N | 3.0872774  | -0.6256788 | -0.5740001 |
| C | 0.4491411  | 0.1990726  | 2.9410350  |
| N | -0.3495915 | 0.9356091  | 3.7605602  |
| C | -0.7254715 | 2.3024412  | 3.4177363  |
| H | -0.5344951 | 2.4890382  | 2.3536610  |
| H | -0.1755345 | 3.0458735  | 4.0186219  |
| H | -1.8022072 | 2.4361076  | 3.6080980  |
| C | -0.8188490 | 0.4575123  | 5.0588996  |
| H | -0.2869656 | -0.4587302 | 5.3414172  |
| H | -1.9037671 | 0.2613043  | 5.0580123  |
| H | -0.6081903 | 1.2288175  | 5.8171287  |
| N | 0.2873219  | -1.1382166 | 2.8970244  |
| C | -1.0089488 | -1.7854408 | 3.0660135  |
| H | -1.8105799 | -1.0423736 | 3.0927193  |
| H | -1.0433099 | -2.3919409 | 3.9852671  |
| H | -1.1905357 | -2.4408870 | 2.2015602  |
| C | 1.3612653  | -2.0300037 | 2.4788074  |
| H | 2.3270632  | -1.5175175 | 2.5579632  |
| H | 1.2068578  | -2.3456868 | 1.4361773  |
| H | 1.3667125  | -2.9149689 | 3.1336993  |
| C | 3.4701284  | 3.1291368  | 0.2041274  |
| H | 4.4307705  | 3.6320082  | 0.4047847  |
| H | 2.6704585  | 3.6882480  | 0.7037432  |
| H | 3.2818101  | 3.1277310  | -0.8764400 |
| C | 2.8559679  | -1.6115739 | -1.4505053 |
| N | 3.5018308  | -2.8057755 | -1.3755563 |
| C | 3.8616649  | -3.4132226 | -0.0991199 |
| H | 3.3377049  | -2.9129278 | 0.7213824  |
| H | 4.9476085  | -3.3686175 | 0.0858202  |
| H | 3.5547196  | -4.4713136 | -0.1081742 |
| C | 3.9116298  | -3.5511270 | -2.5635869 |
| H | 3.8388920  | -2.9158210 | -3.4544756 |
| H | 3.3013349  | -4.4571045 | -2.7130243 |
| H | 4.9626200  | -3.8586147 | -2.4413980 |
| N | 1.9801109  | -1.4174102 | -2.4631254 |
| C | 1.1399650  | -2.4944821 | -2.9771530 |
| H | 1.1751346  | -3.3604029 | -2.3056032 |
| H | 1.4416855  | -2.8063897 | -3.9900773 |
| H | 0.0990626  | -2.1403741 | -3.0251414 |
| C | 1.6797912  | -0.0871863 | -2.9744029 |
| H | 2.4930685  | 0.6053322  | -2.7260715 |
| H | 0.7436554  | 0.3041435  | -2.5477423 |
| H | 1.5755257  | -0.1382617 | -4.0687737 |
| C | 0.2835764  | 3.1788543  | -0.8921997 |
| C | -0.2644237 | 4.4543945  | -1.3019256 |

**0.719866**

|                                                                                             |            |            |            |
|---------------------------------------------------------------------------------------------|------------|------------|------------|
| H                                                                                           | -0.3286858 | 4.4909623  | -2.3990580 |
| H                                                                                           | -1.2722311 | 4.5757251  | -0.8798106 |
| H                                                                                           | 0.3917364  | 5.2618718  | -0.9413007 |
| C                                                                                           | -2.6695835 | 2.7331119  | -3.0539074 |
| C                                                                                           | -3.4573727 | 3.3939291  | -2.1009549 |
| C                                                                                           | -2.1065008 | 1.4934379  | -2.7490850 |
| C                                                                                           | -3.6647322 | 2.8149830  | -0.8431107 |
| C                                                                                           | -2.3260607 | 0.8930927  | -1.4937716 |
| C                                                                                           | -3.1043771 | 1.5714397  | -0.5268118 |
| C                                                                                           | -1.7963211 | -0.4470931 | -1.1746496 |
| C                                                                                           | -3.3048665 | 0.9211266  | 0.8229695  |
| C                                                                                           | -3.3725346 | -0.5875740 | 0.7495509  |
| C                                                                                           | -2.5858953 | -1.2514078 | -0.2200299 |
| C                                                                                           | -4.1501581 | -1.3390623 | 1.6373308  |
| C                                                                                           | -2.5663637 | -2.6590447 | -0.2496069 |
| C                                                                                           | -4.1345124 | -2.7382189 | 1.5926902  |
| C                                                                                           | -3.3342858 | -3.3993783 | 0.6504176  |
| H                                                                                           | -2.5023878 | 3.1823980  | -4.0362685 |
| H                                                                                           | -3.9067504 | 4.3622029  | -2.3361938 |
| H                                                                                           | -1.5063000 | 0.9676255  | -3.4969391 |
| H                                                                                           | -4.2800531 | 3.3319313  | -0.1009668 |
| H                                                                                           | -4.7692468 | -0.8248295 | 2.3784518  |
| H                                                                                           | -1.9478506 | -3.1697960 | -0.9931200 |
| H                                                                                           | -4.7449968 | -3.3127234 | 2.2942089  |
| H                                                                                           | -3.3150605 | -4.4917550 | 0.6158934  |
| H                                                                                           | -2.4379774 | 1.1844551  | 1.4626076  |
| H                                                                                           | -4.1886879 | 1.3334159  | 1.3325306  |
| H                                                                                           | -1.4649420 | -1.0111036 | -2.0559214 |
| H                                                                                           | -0.6460321 | -0.3371512 | -0.5768350 |
| Fe                                                                                          | 1.4866935  | 0.5817235  | 0.2174032  |
| N                                                                                           | 0.1629969  | 1.9477617  | -0.6670555 |
| O                                                                                           | 0.4440772  | -0.8348841 | -0.1785290 |
| N                                                                                           | 0.8796597  | 0.7993043  | 2.0810200  |
| C                                                                                           | 1.3498021  | 2.0673473  | 2.6416375  |
| H                                                                                           | 1.2820569  | 2.0709395  | 3.7410907  |
| H                                                                                           | 0.7662321  | 2.9314953  | 2.2800052  |
| C                                                                                           | 2.8018947  | 2.1957362  | 2.2051711  |
| H                                                                                           | 3.2595687  | 3.1395075  | 2.5432728  |
| H                                                                                           | 3.3756019  | 1.3608135  | 2.6297832  |
| N                                                                                           | 2.8773134  | 2.1032397  | 0.7123650  |
| C                                                                                           | 4.2223799  | 1.6346999  | 0.2514707  |
| H                                                                                           | 5.0127291  | 2.0780989  | 0.8786423  |
| H                                                                                           | 4.3596646  | 1.9930111  | -0.7777619 |
| C                                                                                           | 4.2632134  | 0.1179639  | 0.2502675  |
| H                                                                                           | 5.1820221  | -0.2314840 | -0.2450433 |
| H                                                                                           | 4.2821205  | -0.2706800 | 1.2828505  |
| N                                                                                           | 3.0608287  | -0.3178524 | -0.4660481 |
| <b>[Fe<sup>IV</sup>(O)TMG<sub>2</sub>dien(MeCN)]<sup>2+</sup>-DHA-IC (<math>\pi</math>)</b> |            |            |            |
| <b>E<sub>B3LYP-D3/def2-SVP(Fe:def2-TZVP)/COSMO(<math>\epsilon</math> = 35.88):</sub></b>    |            |            |            |
| <b>-2985.8538807335 (&lt;S<sup>2</sup>&gt; 6.07905533)</b>                                  |            |            |            |
| <b>E<sub>B3LYP-D3/def2-TZVPP/COSMO(<math>\epsilon</math> = 35.88):</sub></b>                |            |            |            |
| <b>-2987.7452109988 (&lt;S<sup>2</sup>&gt; 6.07861123)</b>                                  |            |            |            |
| <b>ZPE<sub>B3LYP-D3/def2-SVP(Fe:def2-TZVP)/COSMO(<math>\epsilon</math> = 35.88):</sub></b>  |            |            |            |
| <b>0.791536</b>                                                                             |            |            |            |
| <b>Chem. Pot.<sub>(298.15)/B3LYP-D3/def2-SVP(Fe:def2-</sub></b>                             |            |            |            |
| <b>TZVP)/COSMO(<math>\epsilon</math> = 35.88):</b>                                          |            |            |            |
| <b>0.723438</b>                                                                             |            |            |            |

|   |            |            |            |
|---|------------|------------|------------|
| C | -0.0157465 | 0.0459360  | 2.7376556  |
| N | -1.0671420 | 0.6110744  | 3.3888220  |
| C | -1.6805349 | 1.8402588  | 2.8993167  |
| H | -1.3926651 | 2.0110971  | 1.8543592  |
| H | -1.3918989 | 2.7181361  | 3.5009679  |
| H | -2.7764838 | 1.7382405  | 2.9485181  |
| C | -1.6227568 | 0.0687794  | 4.6262614  |
| H | -0.9413076 | -0.6776224 | 5.0516712  |
| H | -2.6114981 | -0.3927652 | 4.4670961  |
| H | -1.7370789 | 0.8893925  | 5.3521972  |
| N | 0.1231294  | -1.2947255 | 2.7600132  |
| C | -1.0215066 | -2.1995854 | 2.7497169  |
| H | -1.9432351 | -1.6514477 | 2.5262105  |
| H | -1.1366048 | -2.7334783 | 3.7065807  |
| H | -0.8740203 | -2.9376486 | 1.9490124  |
| C | 1.4144664  | -1.9325043 | 2.5365605  |
| H | 2.2255110  | -1.2277271 | 2.7546336  |
| H | 1.4936583  | -2.2604230 | 1.4893098  |
| H | 1.5036650  | -2.8031645 | 3.2038529  |
| C | 2.5974754  | 3.4300140  | 0.1119018  |
| H | 3.4216295  | 4.1250662  | 0.3409634  |
| H | 1.6670228  | 3.8419302  | 0.5180060  |
| H | 2.4982815  | 3.3298116  | -0.9759981 |
| C | 3.0811489  | -1.3555167 | -1.3119891 |
| N | 3.9274710  | -2.4056891 | -1.1436257 |
| C | 4.3178495  | -2.8869010 | 0.1769311  |
| H | 3.6692152  | -2.4577397 | 0.9470158  |
| H | 5.3666563  | -2.6398060 | 0.4100326  |
| H | 4.2052394  | -3.9825157 | 0.2056670  |
| C | 4.5187681  | -3.1219863 | -2.2713064 |
| H | 4.3736625  | -2.5548917 | -3.1986334 |
| H | 4.0854270  | -4.1287853 | -2.3914354 |
| H | 5.6006125  | -3.2307657 | -2.0927082 |
| N | 2.2647524  | -1.3579933 | -2.3917750 |
| C | 1.6083573  | -2.5760813 | -2.8547061 |
| H | 1.8027293  | -3.4039844 | -2.1634088 |
| H | 1.9392161  | -2.8600534 | -3.8667277 |
| H | 0.5204719  | -2.4029091 | -2.8784855 |
| C | 1.7562804  | -0.1243800 | -2.9729603 |
| H | 2.4149847  | 0.7148668  | -2.7177052 |
| H | 0.7404031  | 0.0965192  | -2.6088071 |
| H | 1.7251059  | -0.2311417 | -4.0680723 |
| C | -0.5645143 | 2.7779888  | -1.0104828 |
| C | -1.4465266 | 3.8556918  | -1.4013532 |
| H | -1.3207139 | 4.0629109  | -2.4738698 |
| H | -2.4915220 | 3.5677784  | -1.2140016 |
| H | -1.1987855 | 4.7566992  | -0.8190733 |
| C | -3.4567860 | 2.3635630  | -3.7401564 |

|   |            |            |            |
|---|------------|------------|------------|
| C | -4.4842067 | 2.8066678  | -2.8906248 |
| C | -2.7083626 | 1.2419865  | -3.3987498 |
| C | -4.7366973 | 2.1301789  | -1.6883912 |
| C | -2.9754891 | 0.5235634  | -2.2023831 |
| C | -3.9952819 | 1.0023369  | -1.3254425 |
| C | -2.3026765 | -0.7019333 | -1.9047648 |
| C | -4.2199107 | 0.3067797  | -0.0020999 |
| C | -3.7588846 | -1.1320926 | 0.0460805  |
| C | -2.7480111 | -1.5727617 | -0.8614367 |
| C | -4.2713042 | -2.0279213 | 0.9876349  |
| C | -2.2568550 | -2.9012020 | -0.7473465 |
| C | -3.8003562 | -3.3459522 | 1.0630424  |
| C | -2.7825307 | -3.7766268 | 0.1956584  |
| H | -3.2472068 | 2.8973683  | -4.6707480 |
| H | -5.0795188 | 3.6830943  | -3.1584481 |
| H | -1.9189079 | 0.8835160  | -4.0655662 |
| H | -5.5272202 | 2.4876167  | -1.0218163 |
| H | -5.0550801 | -1.6929102 | 1.6737259  |
| H | -1.4693739 | -3.2333726 | -1.4288620 |
| H | -4.2185914 | -4.0327521 | 1.8031461  |
| H | -2.4031530 | -4.7996046 | 0.2620505  |
| H | -3.6591100 | 0.8693381  | 0.7748686  |
| H | -5.2755913 | 0.3859399  | 0.3028167  |
| H | -1.5255917 | -1.0531308 | -2.5877669 |
| H | -0.4959377 | -0.6010244 | -0.2394521 |

### [Fe<sup>IV</sup>(O)TMG<sub>3</sub>tren]<sup>2+</sup> ( $\sigma$ ) pathway

|    |           |           |           |
|----|-----------|-----------|-----------|
| Fe | 2.4730594 | 4.4164800 | 6.4042077 |
| O  | 3.7467882 | 4.4752947 | 5.3929296 |
| N  | 0.8063533 | 4.3387685 | 7.7277133 |
| N  | 3.3678259 | 3.4035539 | 7.8927996 |
| N  | 1.2203695 | 3.4181598 | 5.1890624 |
| N  | 2.2161133 | 6.3991232 | 6.6183398 |
| N  | 5.4309717 | 2.9273049 | 8.9512330 |
| N  | 5.0559889 | 2.2579811 | 6.7587528 |
| N  | 1.0678659 | 1.8809671 | 3.3953222 |
| N  | 2.0530512 | 3.9601989 | 3.0768357 |
| N  | 2.5094666 | 8.5168141 | 5.6017818 |
| N  | 4.3532101 | 7.2209683 | 6.1645824 |
| C  | 1.1346861 | 3.3388362 | 8.7820634 |
| H  | 0.9419915 | 2.3381842 | 8.3739867 |
| H  | 0.4813983 | 3.4830515 | 9.6585579 |
| C  | 2.6062085 | 3.4514390 | 9.1458925 |
| H  | 2.7831469 | 4.3882216 | 9.6997122 |
| H  | 2.8895403 | 2.6261024 | 9.8181326 |
| C  | 4.6012775 | 2.8847683 | 7.8721272 |
| C  | 5.4488454 | 4.0398789 | 9.8932817 |

### [Fe<sup>IV</sup>(O)TMG<sub>3</sub>tren]<sup>2+</sup>

**E**<sub>B3LYP-D3/def2-SVP(Fe:def2-TZVP)/COSMO( $\epsilon$  = 35.88):</sub>

**-2713.4279427064 (<S<sup>2</sup>> 6.04963931)**

**E**<sub>B3LYP-D3/def2-TZVPP/COSMO( $\epsilon$  = 35.88):</sub>

**-2715.0272346409 (<S<sup>2</sup>> 6.05198125)**

**ZPE**<sub>B3LYP-D3/def2-SVP(Fe:def2-TZVP)/COSMO( $\epsilon$  = 35.88):</sub>

**0.726585**

**Chem. Pot.**<sub>(298.15)/B3LYP-D3/def2-SVP(Fe:def2-</sub>

**TZVP)/COSMO( $\epsilon$  = 35.88):**

**0.666116 ( $\sigma$  = 3)**

|   |            |            |            |
|---|------------|------------|------------|
| H | 4.9081674  | 4.8987680  | 9.4857612  |
| H | 6.4935128  | 4.3444203  | 10.0663780 |
| H | 5.0037292  | 3.7624838  | 10.8631247 |
| C | 6.3672772  | 1.8467878  | 9.2534164  |
| H | 6.1231523  | 0.9558415  | 8.6627004  |
| H | 6.2800226  | 1.5926811  | 10.3220038 |
| H | 7.4114825  | 2.1389844  | 9.0524876  |
| C | 6.4306955  | 2.4009179  | 6.2944354  |
| H | 6.9631865  | 3.1473257  | 6.8960112  |
| H | 6.4144052  | 2.7512208  | 5.2493570  |
| H | 6.9799697  | 1.4456912  | 6.3362376  |
| C | 4.1648402  | 1.5429257  | 5.8598736  |
| H | 3.2021940  | 1.3827288  | 6.3571162  |
| H | 4.6101073  | 0.5662536  | 5.6103648  |
| H | 3.9938066  | 2.1123091  | 4.9338431  |
| C | -0.3729977 | 3.9235618  | 6.9177147  |
| H | -0.7506471 | 4.8077822  | 6.3880306  |
| H | -1.1744373 | 3.5512185  | 7.5772096  |
| C | 0.0546938  | 2.8797420  | 5.8988958  |
| H | 0.2864881  | 1.9313087  | 6.4111111  |
| H | -0.7754080 | 2.6719961  | 5.2052563  |
| C | 1.4494715  | 3.0807867  | 3.9144432  |
| C | 1.0644969  | 0.6470693  | 4.1718733  |
| H | 1.6214473  | 0.7768288  | 5.1040876  |
| H | 1.5582570  | -0.1448562 | 3.5861074  |
| H | 0.0401093  | 0.3150545  | 4.4086875  |
| C | 0.6207881  | 1.7411033  | 2.0111194  |
| H | 0.4133666  | 2.7264852  | 1.5771422  |
| H | -0.3093450 | 1.1505446  | 1.9985828  |
| H | 1.3676927  | 1.2215121  | 1.3880004  |
| C | 3.0352579  | 3.5385025  | 2.0852395  |
| H | 3.2715661  | 2.4746854  | 2.2075984  |
| H | 3.9616827  | 4.1154441  | 2.2403003  |
| H | 2.6808209  | 3.7130638  | 1.0557737  |
| C | 1.8924889  | 5.3975283  | 3.2241048  |
| H | 1.0497568  | 5.6002686  | 3.8936177  |
| H | 1.6852948  | 5.8414115  | 2.2369587  |
| H | 2.7984027  | 5.8572472  | 3.6471103  |
| C | 0.6365454  | 5.7061964  | 8.2938962  |
| H | 1.3620114  | 5.8299387  | 9.1083874  |
| H | -0.3755875 | 5.8191179  | 8.7166513  |
| C | 0.9199484  | 6.7394086  | 7.2156359  |
| H | 0.1083307  | 6.7324119  | 6.4695054  |
| H | 0.9359976  | 7.7477059  | 7.6588219  |
| C | 3.0048779  | 7.3611136  | 6.1249518  |
| C | 1.2488984  | 8.5796393  | 4.8719702  |
| H | 0.9073235  | 7.5754815  | 4.6053789  |
| H | 1.4037892  | 9.1466049  | 3.9399790  |

|    |            |            |            |                                                                                            |
|----|------------|------------|------------|--------------------------------------------------------------------------------------------|
| H  | 0.4616585  | 9.0832956  | 5.4569889  |                                                                                            |
| C  | 3.2063028  | 9.7936291  | 5.7422168  |                                                                                            |
| H  | 3.9949763  | 9.7150477  | 6.4999558  |                                                                                            |
| H  | 2.4820024  | 10.5569216 | 6.0690728  |                                                                                            |
| H  | 3.6517135  | 10.1262407 | 4.7898058  |                                                                                            |
| C  | 5.2108683  | 7.6508296  | 5.0666336  |                                                                                            |
| H  | 4.6058512  | 7.9760438  | 4.2118133  |                                                                                            |
| H  | 5.8262911  | 6.7946865  | 4.7450232  |                                                                                            |
| H  | 5.8818805  | 8.4726970  | 5.3669380  |                                                                                            |
| C  | 5.0192543  | 6.4806052  | 7.2236609  |                                                                                            |
| H  | 4.3173389  | 6.3202296  | 8.0489947  |                                                                                            |
| H  | 5.8790611  | 7.0655155  | 7.5883946  |                                                                                            |
| H  | 5.3710155  | 5.5019923  | 6.8637199  |                                                                                            |
| Fe | -0.9133655 | -0.0077933 | 0.7188512  | <b>[Fe<sup>IV</sup>(O)TMG<sub>3</sub>tren]<sup>2+</sup>-CHD-RC (<math>\sigma</math>)</b>   |
| O  | 0.1830448  | -0.0062660 | -0.4843244 | <b>E<sub>B3LYP-D3/def2-SVP(Fe:def2-TZVP)/COSMO(<math>\epsilon</math> = 35.88):</sub></b>   |
| N  | -2.3449025 | -0.0309893 | 2.3012602  | <b>-2946.5429520195 (&lt;S<sup>2</sup>&gt; 6.05142420)</b>                                 |
| N  | 0.3312123  | 0.5019202  | 2.2080771  | <b>E<sub>B3LYP-D3/def2-TZVPP/COSMO(<math>\epsilon</math> = 35.88):</sub></b>               |
| N  | -1.4771641 | -1.9279584 | 0.5351077  | <b>-2948.3981139061 (&lt;S<sup>2</sup>&gt; 6.05373523)</b>                                 |
| N  | -2.1598778 | 1.3952061  | -0.0291854 | <b>ZPE<sub>B3LYP-D3/def2-SVP(Fe:def2-TZVP)/COSMO(<math>\epsilon</math> = 35.88):</sub></b> |
| N  | 2.3330557  | 1.6052280  | 2.8099672  | <b>0.850417</b>                                                                            |
| N  | 2.4010030  | -0.3028267 | 1.4840447  | <b>Chem. Pot.<sub>(298.15)/B3LYP-D3/def2-SVP(Fe:def2-</sub></b>                            |
| N  | -0.8459804 | -4.0893136 | -0.1968571 | <b>TZVP)/COSMO(<math>\epsilon</math> = 35.88):</b>                                         |
| N  | -1.0518557 | -2.3487038 | -1.7210590 | <b>0.781968</b>                                                                            |
| N  | -3.0023495 | 2.4813976  | -1.9570207 |                                                                                            |
| N  | -0.7470982 | 2.6275372  | -1.4237537 |                                                                                            |
| C  | -1.5818271 | 0.0181242  | 3.5790207  |                                                                                            |
| H  | -1.2254411 | -0.9956663 | 3.8038158  |                                                                                            |
| H  | -2.2407985 | 0.3404920  | 4.4022554  |                                                                                            |
| C  | -0.3849383 | 0.9391901  | 3.4126525  |                                                                                            |
| H  | -0.7229781 | 1.9858104  | 3.3329528  |                                                                                            |
| H  | 0.2582823  | 0.8794109  | 4.3045115  |                                                                                            |
| C  | 1.6667455  | 0.6106001  | 2.1595103  |                                                                                            |
| C  | 1.7905601  | 2.9507771  | 2.9520876  |                                                                                            |
| H  | 0.9373783  | 3.0934750  | 2.2823580  |                                                                                            |
| H  | 2.5683778  | 3.6811756  | 2.6768514  |                                                                                            |
| H  | 1.4723875  | 3.1573985  | 3.9874708  |                                                                                            |
| C  | 3.6290470  | 1.3880079  | 3.4487964  |                                                                                            |
| H  | 3.8341431  | 0.3145988  | 3.5387344  |                                                                                            |
| H  | 3.5986333  | 1.8204990  | 4.4617477  |                                                                                            |
| H  | 4.4504771  | 1.8689296  | 2.8922650  |                                                                                            |
| C  | 3.6364591  | 0.0432336  | 0.7894339  |                                                                                            |
| H  | 3.7200247  | 1.1295440  | 0.6704311  |                                                                                            |
| H  | 3.6096338  | -0.4082261 | -0.2114224 |                                                                                            |
| H  | 4.5277177  | -0.3354161 | 1.3166458  |                                                                                            |
| C  | 1.9556542  | -1.6763652 | 1.3112437  |                                                                                            |
| H  | 1.1362378  | -1.8818240 | 2.0081450  |                                                                                            |
| H  | 2.7938959  | -2.3581109 | 1.5260795  |                                                                                            |

|   |            |            |            |
|---|------------|------------|------------|
| H | 1.5981370  | -1.8496465 | 0.2853121  |
| C | -3.1241699 | -1.2936177 | 2.1673350  |
| H | -3.8976648 | -1.1381312 | 1.4041346  |
| H | -3.6260616 | -1.5321918 | 3.1196317  |
| C | -2.2007170 | -2.4134111 | 1.7153193  |
| H | -1.5136404 | -2.6860413 | 2.5337335  |
| H | -2.7916199 | -3.3129966 | 1.4817502  |
| C | -1.1194237 | -2.7768738 | -0.4360014 |
| C | -0.2182123 | -4.5575396 | 1.0330257  |
| H | 0.2020532  | -3.7194285 | 1.5953184  |
| H | 0.6048660  | -5.2431765 | 0.7752041  |
| H | -0.9317506 | -5.0989003 | 1.6759235  |
| C | -1.1830218 | -5.1393871 | -1.1559556 |
| H | -1.8743347 | -4.7541909 | -1.9149135 |
| H | -1.6799181 | -5.9620900 | -0.6173159 |
| H | -0.2869106 | -5.5448544 | -1.6544457 |
| C | -0.0204877 | -2.8086018 | -2.6427903 |
| H | 0.7473960  | -3.3785641 | -2.1059096 |
| H | 0.4577486  | -1.9270766 | -3.0979327 |
| H | -0.4353988 | -3.4337152 | -3.4506186 |
| C | -1.9102654 | -1.2907706 | -2.2277440 |
| H | -2.7264256 | -1.1169777 | -1.5188896 |
| H | -2.3318678 | -1.5995576 | -3.1977935 |
| H | -1.3485816 | -0.3534773 | -2.3567255 |
| C | -3.2040028 | 1.1730397  | 2.1293471  |
| H | -2.6662577 | 2.0371908  | 2.5404234  |
| H | -4.1426209 | 1.0534494  | 2.6955279  |
| C | -3.4604628 | 1.4060124  | 0.6508757  |
| H | -4.1316644 | 0.6230138  | 0.2610541  |
| H | -3.9779925 | 2.3679232  | 0.5101433  |
| C | -1.9778118 | 2.1428507  | -1.1230351 |
| C | -4.1140644 | 1.5872961  | -2.2572724 |
| H | -3.8959371 | 0.5707106  | -1.9185770 |
| H | -4.2635364 | 1.5577975  | -3.3487226 |
| H | -5.0522617 | 1.9277545  | -1.7886846 |
| C | -3.0673027 | 3.7858994  | -2.6125837 |
| H | -2.3419498 | 4.4746283  | -2.1633349 |
| H | -4.0776909 | 4.2023006  | -2.4707752 |
| H | -2.8735957 | 3.7129191  | -3.6958185 |
| C | -0.2698684 | 2.7222535  | -2.7976459 |
| H | -0.9783913 | 2.2460124  | -3.4852797 |
| H | 0.6881406  | 2.1866250  | -2.8756399 |
| H | -0.1125264 | 3.7684584  | -3.1079153 |
| C | 0.2254229  | 2.9697214  | -0.3979390 |
| H | -0.2727919 | 2.9926479  | 0.5771910  |
| H | 0.6436127  | 3.9663165  | -0.6141017 |
| H | 1.0406357  | 2.2318886  | -0.3581137 |
| C | 4.7648208  | -1.2127639 | -2.5561386 |



|    |           |            |            |                                                                                            |
|----|-----------|------------|------------|--------------------------------------------------------------------------------------------|
| C  | 5.5887033 | 0.0189556  | -2.2846540 |                                                                                            |
| C  | 4.7921859 | 1.2939838  | -2.3812571 |                                                                                            |
| C  | 3.4768371 | 1.3244624  | -2.6333278 |                                                                                            |
| C  | 2.6386930 | 0.0901098  | -2.8437781 |                                                                                            |
| C  | 3.4488206 | -1.1796094 | -2.8082879 |                                                                                            |
| H  | 5.2894317 | -2.1746454 | -2.5359709 |                                                                                            |
| H  | 5.3376527 | 2.2319659  | -2.2279147 |                                                                                            |
| H  | 2.9635946 | 2.2912669  | -2.6832898 |                                                                                            |
| H  | 2.9125575 | -2.1168060 | -2.9919837 |                                                                                            |
| H  | 2.0907796 | 0.1619482  | -3.8051076 |                                                                                            |
| H  | 1.8381147 | 0.0448584  | -2.0776030 |                                                                                            |
| H  | 6.0566796 | -0.0563298 | -1.2814788 |                                                                                            |
| H  | 6.4523725 | 0.0573998  | -2.9779840 |                                                                                            |
| Fe | 2.6034545 | 4.4018110  | 6.2897386  | <b>[Fe<sup>IV</sup>(O)TMG<sub>3</sub>tren]<sup>2+</sup>-CHD-TS (<math>\sigma</math>)</b>   |
| O  | 3.9355685 | 4.3882740  | 5.2258933  | <b>E<sub>B3LYP-D3/def2-SVP(Fe:def2-TZVP)/COSMO(<math>\epsilon</math> = 35.88):</sub></b>   |
| N  | 0.8329856 | 4.3412420  | 7.7514161  | <b>-2946.5236426768 (&lt;S<sup>2</sup>&gt; 6.50946640)</b>                                 |
| N  | 3.4485246 | 3.4455948  | 7.8869959  | <b>E<sub>B3LYP-D3/def2-TZVPP/COSMO(<math>\epsilon</math> = 35.88):</sub></b>               |
| N  | 1.2398864 | 3.3491648  | 5.1818485  | <b>-2948.3775944569 (&lt;S<sup>2</sup>&gt; 6.50015134)</b>                                 |
| N  | 2.2009444 | 6.4181251  | 6.4853617  | <b>ZPE<sub>B3LYP-D3/def2-SVP(Fe:def2-TZVP)/COSMO(<math>\epsilon</math> = 35.88):</sub></b> |
| N  | 5.4736552 | 2.8274200  | 8.9451081  | <b>0.843587</b>                                                                            |
| N  | 4.9269087 | 1.9657793  | 6.8570863  | <b>Chem. Pot.<sub>(298.15)/B3LYP-D3/def2-SVP(Fe:def2-</sub></b>                            |
| N  | 0.8689160 | 1.8924682  | 3.3475614  | <b>TZVP)/COSMO(<math>\epsilon</math> = 35.88):</b>                                         |
| N  | 1.7947713 | 3.9964401  | 3.0108092  | <b>0.775481</b>                                                                            |
| N  | 2.3983660 | 8.6160477  | 5.6178658  |                                                                                            |
| N  | 4.2971041 | 7.3900693  | 6.1564474  |                                                                                            |
| C  | 1.2511029 | 3.4805659  | 8.8791782  |                                                                                            |
| H  | 1.0785076 | 2.4322161  | 8.5990977  |                                                                                            |
| H  | 0.6460953 | 3.6922540  | 9.7787487  |                                                                                            |
| C  | 2.7373736 | 3.6737813  | 9.1484997  |                                                                                            |
| H  | 2.9213809 | 4.6889395  | 9.5408596  |                                                                                            |
| H  | 3.0634945 | 2.9672269  | 9.9275500  |                                                                                            |
| C  | 4.6024123 | 2.7708142  | 7.8968294  |                                                                                            |
| C  | 5.6608924 | 4.0342312  | 9.7399340  |                                                                                            |
| H  | 5.2101434 | 4.8952571  | 9.2384912  |                                                                                            |
| H  | 6.7400851 | 4.2273595  | 9.8524288  |                                                                                            |
| H  | 5.2204395 | 3.9367391  | 10.7463381 |                                                                                            |
| C  | 6.2489624 | 1.6688846  | 9.3808206  |                                                                                            |
| H  | 5.8588712 | 0.7540621  | 8.9188551  |                                                                                            |
| H  | 6.1554736 | 1.5713480  | 10.4746067 |                                                                                            |
| H  | 7.3189922 | 1.7705133  | 9.1338596  |                                                                                            |
| C  | 6.2975479 | 1.7905921  | 6.3947065  |                                                                                            |
| H  | 6.9559351 | 2.5421841  | 6.8444106  |                                                                                            |
| H  | 6.3091880 | 1.9347643  | 5.3056466  |                                                                                            |
| H  | 6.6848657 | 0.7828068  | 6.6183661  |                                                                                            |
| C  | 3.9131365 | 1.3495173  | 6.0179579  |                                                                                            |
| H  | 2.9526250 | 1.3505332  | 6.5450011  |                                                                                            |
| H  | 4.2047293 | 0.3090897  | 5.8039654  |                                                                                            |

|   |            |            |           |
|---|------------|------------|-----------|
| H | 3.7992050  | 1.8984162  | 5.0708812 |
| C | -0.3063874 | 3.7780464  | 6.9946180 |
| H | -0.7891018 | 4.5918884  | 6.4368228 |
| H | -1.0591603 | 3.3503584  | 7.6803280 |
| C | 0.1893588  | 2.7363176  | 6.0011132 |
| H | 0.5657558  | 1.8519167  | 6.5437337 |
| H | -0.6547057 | 2.3944981  | 5.3822741 |
| C | 1.3082601  | 3.0717266  | 3.8773288 |
| C | 0.9914411  | 0.6163535  | 4.0407867 |
| H | 1.6459412  | 0.7107478  | 4.9104660 |
| H | 1.4368947  | -0.1236847 | 3.3559985 |
| H | 0.0114485  | 0.2344695  | 4.3722634 |
| C | 0.2046701  | 1.8253890  | 2.0481782 |
| H | -0.0822080 | 2.8294954  | 1.7136520 |
| H | -0.7106745 | 1.2200231  | 2.1501689 |
| H | 0.8430815  | 1.3567331  | 1.2805092 |
| C | 2.5711267  | 3.6338514  | 1.8323828 |
| H | 2.8836936  | 2.5838776  | 1.8859797 |
| H | 3.4722686  | 4.2655867  | 1.7989744 |
| H | 2.0087114  | 3.7951965  | 0.8977894 |
| C | 1.6925228  | 5.4220114  | 3.2717968 |
| H | 0.9298599  | 5.5952491  | 4.0385372 |
| H | 1.3970248  | 5.9401322  | 2.3456810 |
| H | 2.6505327  | 5.8301202  | 3.6290238 |
| C | 0.5975884  | 5.7388076  | 8.1707129 |
| H | 1.2995849  | 5.9814450  | 8.9801666 |
| H | -0.4261439 | 5.8626065  | 8.5668309 |
| C | 0.8544365  | 6.6814597  | 7.0055933 |
| H | 0.0861774  | 6.5324506  | 6.2274423 |
| H | 0.7558441  | 7.7210661  | 7.3539037 |
| C | 2.9433060  | 7.4502526  | 6.0801622 |
| C | 1.1965833  | 8.6603157  | 4.7953145 |
| H | 0.9305243  | 7.6597247  | 4.4450902 |
| H | 1.3886846  | 9.2910205  | 3.9116916 |
| H | 0.3386761  | 9.0854760  | 5.3427367 |
| C | 2.9647039  | 9.9205538  | 5.9511844 |
| H | 3.7068451  | 9.8216509  | 6.7524096 |
| H | 2.1548575  | 10.5768629 | 6.3099385 |
| H | 3.4369959  | 10.4028432 | 5.0788090 |
| C | 5.1573892  | 8.0546841  | 5.1849058 |
| H | 4.5700523  | 8.3945554  | 4.3238284 |
| H | 5.9103788  | 7.3415823  | 4.8207094 |
| H | 5.6873572  | 8.9167041  | 5.6230071 |
| C | 4.9721714  | 6.5974903  | 7.1728519 |
| H | 4.2688752  | 6.3793804  | 7.9852083 |
| H | 5.8201010  | 7.1731273  | 7.5765367 |
| H | 5.3360348  | 5.6434846  | 6.7649295 |
| C | 7.2741475  | 2.5730138  | 2.9168805 |

|    |            |            |            |                                                                                            |
|----|------------|------------|------------|--------------------------------------------------------------------------------------------|
| C  | 8.4455687  | 2.8011654  | 3.8270367  |                                                                                            |
| C  | 8.3265904  | 4.0480566  | 4.6523472  |                                                                                            |
| C  | 7.2532123  | 4.8624243  | 4.5975103  |                                                                                            |
| C  | 6.0745226  | 4.5831137  | 3.7488023  |                                                                                            |
| C  | 6.2076365  | 3.3984540  | 2.8742991  |                                                                                            |
| H  | 7.3166048  | 1.7031559  | 2.2533043  |                                                                                            |
| H  | 9.1670152  | 4.2974507  | 5.3083284  |                                                                                            |
| H  | 7.2424968  | 5.7657773  | 5.2134637  |                                                                                            |
| H  | 5.3955658  | 3.1880479  | 2.1735951  |                                                                                            |
| H  | 5.6765691  | 5.4730746  | 3.2297695  |                                                                                            |
| H  | 5.0841989  | 4.4153898  | 4.4875601  |                                                                                            |
| H  | 8.5928961  | 1.9208870  | 4.4879629  |                                                                                            |
| H  | 9.3835987  | 2.8285436  | 3.2353089  |                                                                                            |
| Fe | -0.7990526 | -0.0044602 | 0.5325437  | <b>[Fe<sup>IV</sup>(O)TMG<sub>3</sub>tren]<sup>2+</sup>-CHD-IC (<math>\sigma</math>)</b>   |
| O  | 0.3974778  | 0.0141229  | -0.8413424 | <b>E<sub>B3LYP-D3/def2-SVP(Fe:def2-TZVP)/COSMO(<math>\epsilon</math> = 35.88):</sub></b>   |
| N  | -2.3462975 | -0.0382943 | 2.2882572  | <b>-2946.5636030582 (&lt;S<sup>2</sup>&gt; 7.04129636)</b>                                 |
| N  | 0.3709819  | 0.5481969  | 2.1339950  | <b>E<sub>B3LYP-D3/def2-TZVPP/COSMO(<math>\epsilon</math> = 35.88):</sub></b>               |
| N  | -1.4139584 | -1.9622216 | 0.5010343  | <b>-2948.4186051997 (&lt;S<sup>2</sup>&gt; 7.03867054)</b>                                 |
| N  | -2.1785248 | 1.3734919  | -0.1083423 | <b>ZPE<sub>B3LYP-D3/def2-SVP(Fe:def2-TZVP)/COSMO(<math>\epsilon</math> = 35.88):</sub></b> |
| N  | 2.3922544  | 1.5955055  | 2.7927576  | <b>0.845622</b>                                                                            |
| N  | 2.4322012  | -0.3394482 | 1.5029401  | <b>Chem. Pot.<sub>(298.15)/B3LYP-D3/def2-SVP(Fe:def2-</sub></b>                            |
| N  | -0.8249427 | -4.1460702 | -0.2198070 | <b>TZVP)/COSMO(<math>\epsilon</math> = 35.88):</b>                                         |
| N  | -1.1187806 | -2.4365285 | -1.7627350 | <b>0.776052</b>                                                                            |
| N  | -3.0308013 | 2.5125041  | -2.0062463 |                                                                                            |
| N  | -0.8123998 | 2.7782291  | -1.3743386 |                                                                                            |
| C  | -1.5599527 | 0.1113781  | 3.5282681  |                                                                                            |
| H  | -1.1700180 | -0.8752836 | 3.8144158  |                                                                                            |
| H  | -2.1933693 | 0.4739911  | 4.3578373  |                                                                                            |
| C  | -0.3820058 | 1.0481508  | 3.2883883  |                                                                                            |
| H  | -0.7489153 | 2.0747509  | 3.1174455  |                                                                                            |
| H  | 0.2466019  | 1.0808890  | 4.1918522  |                                                                                            |
| C  | 1.7054679  | 0.6143680  | 2.1428618  |                                                                                            |
| C  | 1.8950904  | 2.9614887  | 2.9037767  |                                                                                            |
| H  | 1.0603195  | 3.1231522  | 2.2163315  |                                                                                            |
| H  | 2.7034583  | 3.6596445  | 2.6327167  |                                                                                            |
| H  | 1.5638792  | 3.1953246  | 3.9291176  |                                                                                            |
| C  | 3.6646752  | 1.3423964  | 3.4650816  |                                                                                            |
| H  | 3.8321655  | 0.2639619  | 3.5713254  |                                                                                            |
| H  | 3.6251968  | 1.7869264  | 4.4725345  |                                                                                            |
| H  | 4.5146187  | 1.7898747  | 2.9234823  |                                                                                            |
| C  | 3.6904750  | -0.0487080 | 0.8262137  |                                                                                            |
| H  | 3.8201596  | 1.0324839  | 0.6999914  |                                                                                            |
| H  | 3.6634382  | -0.5099225 | -0.1718145 |                                                                                            |
| H  | 4.5594472  | -0.4577193 | 1.3678530  |                                                                                            |
| C  | 1.9553146  | -1.7070682 | 1.3709213  |                                                                                            |
| H  | 1.1287535  | -1.8724373 | 2.0704423  |                                                                                            |
| H  | 2.7748023  | -2.4035305 | 1.6093014  |                                                                                            |

|   |            |            |            |
|---|------------|------------|------------|
| H | 1.5983941  | -1.9112099 | 0.3492400  |
| C | -3.0332891 | -1.3426245 | 2.1937245  |
| H | -3.8369588 | -1.2578163 | 1.4494015  |
| H | -3.4990134 | -1.6146851 | 3.1579606  |
| C | -2.0574908 | -2.4196830 | 1.7351774  |
| H | -1.3167563 | -2.6108825 | 2.5306234  |
| H | -2.6022661 | -3.3634888 | 1.5758921  |
| C | -1.1143886 | -2.8363701 | -0.4640761 |
| C | -0.1374008 | -4.5991925 | 0.9830467  |
| H | 0.2884353  | -3.7531271 | 1.5275348  |
| H | 0.6879470  | -5.2697721 | 0.6936625  |
| H | -0.8133029 | -5.1521611 | 1.6561388  |
| C | -1.1928641 | -5.2083998 | -1.1530615 |
| H | -1.9152866 | -4.8355981 | -1.8889314 |
| H | -1.6621410 | -6.0291079 | -0.5869382 |
| H | -0.3145130 | -5.6139519 | -1.6827028 |
| C | -0.1051788 | -2.8750655 | -2.7128996 |
| H | 0.6747645  | -3.4536988 | -2.2032831 |
| H | 0.3638230  | -1.9832288 | -3.1593940 |
| H | -0.5355795 | -3.4861039 | -3.5236170 |
| C | -1.9973880 | -1.3807497 | -2.2376199 |
| H | -2.8022987 | -1.2238916 | -1.5106741 |
| H | -2.4381899 | -1.6820794 | -3.2014737 |
| H | -1.4450104 | -0.4378582 | -2.3718075 |
| C | -3.2521570 | 1.1026600  | 2.0464260  |
| H | -2.7765398 | 2.0122433  | 2.4382957  |
| H | -4.2086588 | 0.9685844  | 2.5829578  |
| C | -3.4840258 | 1.2811466  | 0.5512620  |
| H | -4.0737623 | 0.4336040  | 0.1623602  |
| H | -4.0825898 | 2.1896113  | 0.3805388  |
| C | -2.0188270 | 2.1942873  | -1.1500963 |
| C | -4.0868148 | 1.5755886  | -2.3694149 |
| H | -3.8297254 | 0.5620308  | -2.0511577 |
| H | -4.2003136 | 1.5715002  | -3.4656165 |
| H | -5.0548002 | 1.8560726  | -1.9221157 |
| C | -3.1404181 | 3.8327542  | -2.6225928 |
| H | -2.4706937 | 4.5431699  | -2.1235276 |
| H | -4.1765417 | 4.1907435  | -2.5095655 |
| H | -2.9011342 | 3.8060103  | -3.6989037 |
| C | -0.2683705 | 2.9398285  | -2.7158190 |
| H | -0.9169324 | 2.4562916  | -3.4556124 |
| H | 0.7163838  | 2.4485136  | -2.7569255 |
| H | -0.1411378 | 4.0016249  | -2.9840350 |
| C | 0.0958562  | 3.1054357  | -0.2889774 |
| H | -0.4506518 | 3.0913575  | 0.6609612  |
| H | 0.5093592  | 4.1137614  | -0.4514204 |
| H | 0.9254220  | 2.3840462  | -0.2297242 |
| C | 4.6960928  | -1.2059539 | -2.5163037 |

|    |            |            |            |                                                                        |
|----|------------|------------|------------|------------------------------------------------------------------------|
| C  | 5.5360931  | -0.0073289 | -2.1809186 |                                                                        |
| C  | 4.7924062  | 1.2941769  | -2.2627926 |                                                                        |
| C  | 3.4783815  | 1.3565986  | -2.6492580 |                                                                        |
| C  | 2.7445292  | 0.1812128  | -2.9778083 |                                                                        |
| C  | 3.3834565  | -1.0896844 | -2.8947437 |                                                                        |
| H  | 5.1670915  | -2.1916702 | -2.4574962 |                                                                        |
| H  | 5.3365079  | 2.2093041  | -2.0110636 |                                                                        |
| H  | 2.9842239  | 2.3312201  | -2.7076322 |                                                                        |
| H  | 2.8121088  | -1.9901714 | -3.1376846 |                                                                        |
| H  | 1.7077376  | 0.2522956  | -3.3129288 |                                                                        |
| H  | 1.3379334  | 0.0820455  | -1.0500092 |                                                                        |
| H  | 5.9922349  | -0.1271225 | -1.1729964 |                                                                        |
| H  | 6.4313409  | 0.0252218  | -2.8424235 |                                                                        |
| Fe | -0.1565893 | -0.1381174 | 1.8265869  | <b>[Fe<sup>IV</sup>(O)TMG<sub>3</sub>tren]<sup>2+</sup>-DHA-RC (σ)</b> |
| O  | 0.1418367  | -0.0613245 | 0.2268001  | <b>E<sub>B3LYP-D3/def2-SVP(Fe:def2-TZVP)/COSMO(ε = 35.88):</sub></b>   |
| N  | -0.5316348 | -0.2267944 | 3.9373856  | <b>-3253.4702932659 (&lt;S<sup>2</sup>&gt; 6.05235696)</b>             |
| N  | -0.6234681 | -2.1028349 | 1.9416610  | <b>E<sub>B3LYP-D3/def2-TZVPP/COSMO(ε = 35.88):</sub></b>               |
| N  | -1.6626080 | 1.2000614  | 1.8972868  | <b>-3255.6479784981 (&lt;S<sup>2</sup>&gt; 6.05471527)</b>             |
| N  | 1.6753600  | 0.4127600  | 2.4511587  | <b>ZPE<sub>B3LYP-D3/def2-SVP(Fe:def2-TZVP)/COSMO(ε = 35.88):</sub></b> |
| N  | -0.4462782 | -4.2771957 | 1.0203246  | <b>0.946335</b>                                                        |
| N  | -1.4401318 | -2.5696810 | -0.1977466 | <b>Chem. Pot.<sub>(298.15)/B3LYP-D3/def2-SVP(Fe:def2-</sub></b>        |
| N  | -3.4101584 | 2.3211415  | 0.7666062  | <b>TZVP)/COSMO(ε = 35.88):</b>                                         |
| N  | -1.1998052 | 2.6675083  | 0.1385724  | <b>0.87412</b>                                                         |
| N  | 3.7130170  | 1.5077645  | 1.9591704  |                                                                        |
| N  | 3.0831398  | -0.3854900 | 0.7665612  |                                                                        |
| C  | -1.1813700 | -1.5370581 | 4.2138069  |                                                                        |
| H  | -2.2502241 | -1.4453741 | 3.9813466  |                                                                        |
| H  | -1.0846367 | -1.7901587 | 5.2826335  |                                                                        |
| C  | -0.5716320 | -2.6020259 | 3.3208402  |                                                                        |
| H  | 0.4636451  | -2.8110782 | 3.6387721  |                                                                        |
| H  | -1.1345222 | -3.5419785 | 3.4294839  |                                                                        |
| C  | -0.8184618 | -2.9667127 | 0.9380958  |                                                                        |
| C  | 0.7646366  | -4.7225574 | 1.6986080  |                                                                        |
| H  | 1.4109137  | -3.8739541 | 1.9369405  |                                                                        |
| H  | 1.3223560  | -5.3976240 | 1.0291901  |                                                                        |
| H  | 0.5356278  | -5.2691074 | 2.6284874  |                                                                        |
| C  | -1.2529915 | -5.3475647 | 0.4385062  |                                                                        |
| H  | -2.2469206 | -4.9720810 | 0.1676260  |                                                                        |
| H  | -1.3753154 | -6.1447356 | 1.1895529  |                                                                        |
| H  | -0.7764184 | -5.7855083 | -0.4544101 |                                                                        |
| C  | -1.0715176 | -3.0940750 | -1.5074443 |                                                                        |
| H  | -0.1438753 | -3.6735037 | -1.4442757 |                                                                        |
| H  | -0.8941531 | -2.2500943 | -2.1872932 |                                                                        |
| H  | -1.8654848 | -3.7265347 | -1.9371541 |                                                                        |
| C  | -2.4421224 | -1.5169131 | -0.2093933 |                                                                        |
| H  | -2.7628128 | -1.3111670 | 0.8174198  |                                                                        |
| H  | -3.3105662 | -1.8506241 | -0.7999428 |                                                                        |

|   |            |            |            |
|---|------------|------------|------------|
| H | -2.0386441 | -0.5885994 | -0.6418501 |
| C | -1.4324860 | 0.9094879  | 4.2711631  |
| H | -0.8214380 | 1.8167213  | 4.3655709  |
| H | -1.9288698 | 0.7285070  | 5.2390653  |
| C | -2.4315177 | 1.1013609  | 3.1445336  |
| H | -3.1427302 | 0.2587473  | 3.1205896  |
| H | -3.0222829 | 2.0126328  | 3.3247149  |
| C | -2.0873879 | 2.0375400  | 0.9411891  |
| C | -4.4594306 | 1.3274975  | 0.9578624  |
| H | -4.0311466 | 0.3231300  | 1.0214503  |
| H | -5.1411808 | 1.3552556  | 0.0924239  |
| H | -5.0490811 | 1.5232066  | 1.8689245  |
| C | -3.8818423 | 3.6620246  | 0.4274579  |
| H | -3.0801707 | 4.3962271  | 0.5709356  |
| H | -4.7132392 | 3.9230764  | 1.1019192  |
| H | -4.2476680 | 3.7222512  | -0.6109680 |
| C | -1.5091563 | 3.0241416  | -1.2417664 |
| H | -2.3848340 | 2.4667072  | -1.5952959 |
| H | -0.6519832 | 2.7565054  | -1.8715127 |
| H | -1.6971060 | 4.1033183  | -1.3618242 |
| C | 0.1573567  | 2.9647058  | 0.5686912  |
| H | 0.2211309  | 2.8710082  | 1.6582414  |
| H | 0.4105824  | 3.9966120  | 0.2787529  |
| H | 0.8782766  | 2.2688339  | 0.1141284  |
| C | 0.7846728  | -0.1055606 | 4.6219545  |
| H | 1.2607048  | -1.0947992 | 4.6293319  |
| H | 0.6404416  | 0.2125096  | 5.6678231  |
| C | 1.6664634  | 0.8603713  | 3.8490279  |
| H | 1.2779043  | 1.8883276  | 3.9451112  |
| H | 2.6803856  | 0.8601460  | 4.2779187  |
| C | 2.7993576  | 0.5220101  | 1.7310347  |
| C | 3.3324859  | 2.8562028  | 2.3623746  |
| H | 2.2591089  | 3.0108155  | 2.2229501  |
| H | 3.8685283  | 3.5831775  | 1.7311269  |
| H | 3.5889603  | 3.0571093  | 3.4157633  |
| C | 5.1526667  | 1.2713840  | 1.8715382  |
| H | 5.3616564  | 0.1954005  | 1.8409890  |
| H | 5.6328847  | 1.6904802  | 2.7703616  |
| H | 5.5980969  | 1.7536864  | 0.9857121  |
| C | 3.8205572  | -0.0412347 | -0.4427788 |
| H | 3.8417256  | 1.0461869  | -0.5854479 |
| H | 3.3055332  | -0.4929542 | -1.3022096 |
| H | 4.8541167  | -0.4237317 | -0.4243355 |
| C | 2.6016414  | -1.7561490 | 0.8282129  |
| H | 2.2466852  | -1.9688807 | 1.8416985  |
| H | 3.4280521  | -2.4418594 | 0.5827635  |
| H | 1.7710844  | -1.9149663 | 0.1240563  |
| C | -0.0978718 | -3.1667485 | -4.9766905 |

|    |            |            |            |                                                                                            |
|----|------------|------------|------------|--------------------------------------------------------------------------------------------|
| C  | 1.1731809  | -3.1267792 | -4.3914114 |                                                                                            |
| C  | -0.9123937 | -2.0299779 | -4.9470606 |                                                                                            |
| C  | 1.6228292  | -1.9482713 | -3.7871218 |                                                                                            |
| C  | -0.4745187 | -0.8518686 | -4.3256680 |                                                                                            |
| C  | 0.8083297  | -0.8079441 | -3.7453788 |                                                                                            |
| C  | -1.3617396 | 0.3692294  | -4.2177748 |                                                                                            |
| C  | 1.2558389  | 0.4641010  | -3.0609718 |                                                                                            |
| C  | 0.7026468  | 1.7097361  | -3.7150733 |                                                                                            |
| C  | -0.5840762 | 1.6649625  | -4.2851804 |                                                                                            |
| C  | 1.4181003  | 2.9158518  | -3.7179290 |                                                                                            |
| C  | -1.1317593 | 2.8270323  | -4.8456767 |                                                                                            |
| C  | 0.8613524  | 4.0750746  | -4.2679953 |                                                                                            |
| C  | -0.4182367 | 4.0303292  | -4.8339449 |                                                                                            |
| H  | -0.4540688 | -4.0818503 | -5.4574257 |                                                                                            |
| H  | 1.8167178  | -4.0104338 | -4.4111596 |                                                                                            |
| H  | -1.9072887 | -2.0597997 | -5.4014827 |                                                                                            |
| H  | 2.6209148  | -1.9139621 | -3.3396776 |                                                                                            |
| H  | 2.4187354  | 2.9482763  | -3.2760075 |                                                                                            |
| H  | -2.1319826 | 2.7903533  | -5.2878872 |                                                                                            |
| H  | 1.4267232  | 5.0108899  | -4.2581976 |                                                                                            |
| H  | -0.8593496 | 4.9311669  | -5.2691694 |                                                                                            |
| H  | 0.9084531  | 0.4305475  | -2.0070546 |                                                                                            |
| H  | 2.3537825  | 0.5139504  | -3.0203986 |                                                                                            |
| H  | -2.1570204 | 0.3469902  | -4.9782188 |                                                                                            |
| H  | -1.8820770 | 0.3315978  | -3.2376354 |                                                                                            |
| Fe | -0.3796608 | 0.0235024  | 1.7190311  | <b>[Fe<sup>IV</sup>(O)TMG<sub>3</sub>tren]<sup>2+</sup>-DHA-TS (<math>\sigma</math>)</b>   |
| O  | -0.0226506 | -0.0187595 | 0.0529880  | <b>E<sub>B3LYP-D3/def2-SVP(Fe:def2-TZVP)/COSMO(<math>\epsilon</math> = 35.88):</sub></b>   |
| N  | -0.8343958 | 0.0459205  | 3.9630135  | <b>-3253.4513279768 (&lt;S<sup>2</sup>&gt; 6.48938568)</b>                                 |
| N  | 0.1980091  | -1.8707445 | 2.2318231  | <b>E<sub>B3LYP-D3/def2-TZVPP/COSMO(<math>\epsilon</math> = 35.88):</sub></b>               |
| N  | -2.4063868 | 0.3555470  | 1.6890283  | <b>-3255.6272794767 (&lt;S<sup>2</sup>&gt; 6.48416285)</b>                                 |
| N  | 0.8269976  | 1.5865924  | 2.3359179  | <b>ZPE<sub>B3LYP-D3/def2-SVP(Fe:def2-TZVP)/COSMO(<math>\epsilon</math> = 35.88):</sub></b> |
| N  | 1.4122343  | -3.8227552 | 1.6560787  | <b>0.939819</b>                                                                            |
| N  | -0.3651072 | -3.1155416 | 0.3380448  | <b>Chem. Pot.<sub>(298.15)/B3LYP-D3/def2-SVP(Fe:def2-</sub></b>                            |
| N  | -4.4491429 | 0.3191213  | 0.4842329  | <b>TZVP)/COSMO(<math>\epsilon</math> = 35.88):</b>                                         |
| N  | -2.6821414 | 1.6362075  | -0.2435044 | <b>0.868057</b>                                                                            |
| N  | 2.0939944  | 3.5211689  | 1.8377364  |                                                                                            |
| N  | 2.7629720  | 1.4411107  | 1.0324567  |                                                                                            |
| C  | -0.6295343 | -1.3395045 | 4.4408592  |                                                                                            |
| H  | -1.5529873 | -1.9077471 | 4.2642436  |                                                                                            |
| H  | -0.4304274 | -1.3525819 | 5.5269123  |                                                                                            |
| C  | 0.5007534  | -1.9975428 | 3.6617379  |                                                                                            |
| H  | 1.4620303  | -1.5176722 | 3.9155551  |                                                                                            |
| H  | 0.5828022  | -3.0528680 | 3.9638972  |                                                                                            |
| C  | 0.4236141  | -2.9096077 | 1.4193792  |                                                                                            |
| C  | 2.7016853  | -3.4582163 | 2.2274489  |                                                                                            |
| H  | 2.8208782  | -2.3723329 | 2.2477067  |                                                                                            |
| H  | 3.5066299  | -3.8806593 | 1.6034966  |                                                                                            |

|   |            |            |            |
|---|------------|------------|------------|
| H | 2.8210028  | -3.8467383 | 3.2526430  |
| C | 1.2318406  | -5.2496312 | 1.4008733  |
| H | 0.1728906  | -5.4762299 | 1.2290101  |
| H | 1.5657682  | -5.8122844 | 2.2878148  |
| H | 1.8201600  | -5.5942207 | 0.5337665  |
| C | 0.1258797  | -3.7186003 | -0.8947074 |
| H | 1.2204642  | -3.7339782 | -0.9092532 |
| H | -0.2089934 | -3.1043967 | -1.7416545 |
| H | -0.2581991 | -4.7421363 | -1.0358673 |
| C | -1.7364447 | -2.6404214 | 0.2840530  |
| H | -2.0893934 | -2.4341922 | 1.2998569  |
| H | -2.3712230 | -3.4188560 | -0.1673988 |
| H | -1.8113751 | -1.7165458 | -0.3099443 |
| C | -2.2387098 | 0.4896009  | 4.0999555  |
| H | -2.2606257 | 1.5874729  | 4.0739689  |
| H | -2.6569095 | 0.1693391  | 5.0705338  |
| C | -3.0648084 | -0.0397735 | 2.9395498  |
| H | -3.1590069 | -1.1368341 | 3.0156305  |
| H | -4.0834667 | 0.3719584  | 3.0036100  |
| C | -3.1628599 | 0.7471514  | 0.6586246  |
| C | -4.8886167 | -1.0358712 | 0.7907248  |
| H | -4.0334802 | -1.6844562 | 0.9940950  |
| H | -5.4279196 | -1.4451422 | -0.0794644 |
| H | -5.5671278 | -1.0594851 | 1.6597874  |
| C | -5.4996248 | 1.2085579  | -0.0047975 |
| H | -5.1604171 | 2.2509680  | 0.0212399  |
| H | -6.3778490 | 1.1136786  | 0.6545357  |
| H | -5.8117939 | 0.9558570  | -1.0320373 |
| C | -3.0510711 | 1.5874425  | -1.6541032 |
| H | -3.5518376 | 0.6397703  | -1.8855442 |
| H | -2.1379953 | 1.6502028  | -2.2577680 |
| H | -3.7117632 | 2.4231720  | -1.9378626 |
| C | -1.6835183 | 2.6309876  | 0.1124927  |
| H | -1.6650017 | 2.7523850  | 1.2017588  |
| H | -1.9504117 | 3.5929362  | -0.3528603 |
| H | -0.6823223 | 2.3296831  | -0.2267563 |
| C | 0.1113879  | 1.0059717  | 4.5697366  |
| H | 1.0640401  | 0.4902785  | 4.7536086  |
| H | -0.2680745 | 1.3677419  | 5.5418530  |
| C | 0.3605120  | 2.1573464  | 3.6064508  |
| H | -0.5625735 | 2.7467246  | 3.4694683  |
| H | 1.1091207  | 2.8348352  | 4.0440076  |
| C | 1.8656808  | 2.1759233  | 1.7348657  |
| C | 1.0064033  | 4.4906423  | 1.8430951  |
| H | 0.0741709  | 4.0194300  | 1.5184539  |
| H | 1.2456122  | 5.3041958  | 1.1387659  |
| H | 0.8509092  | 4.9342576  | 2.8410934  |
| C | 3.4226909  | 4.0760704  | 2.0861015  |



|   |            |            |            |
|---|------------|------------|------------|
| H | 4.1274710  | 3.2794844  | 2.3529175  |
| H | 3.3602491  | 4.7727377  | 2.9382369  |
| H | 3.8121698  | 4.6303195  | 1.2159432  |
| C | 3.6017407  | 2.0111985  | -0.0180265 |
| H | 3.1362976  | 2.9136932  | -0.4333098 |
| H | 3.7171833  | 1.2753633  | -0.8257579 |
| H | 4.6115991  | 2.2617930  | 0.3439747  |
| C | 2.9507215  | 0.0223875  | 1.2976907  |
| H | 2.6065558  | -0.2043156 | 2.3130636  |
| H | 4.0199893  | -0.2242690 | 1.2186544  |
| H | 2.3742371  | -0.5951995 | 0.5930133  |
| C | 2.3019571  | -3.5164464 | -3.7723572 |
| C | 3.1119931  | -2.9033422 | -2.8061588 |
| C | 1.1398148  | -2.8763591 | -4.2163859 |
| C | 2.7535641  | -1.6562756 | -2.2940723 |
| C | 0.7658944  | -1.6285809 | -3.7013229 |
| C | 1.5850188  | -1.0045514 | -2.7333103 |
| C | -0.5213752 | -0.9549184 | -4.1190693 |
| C | 1.1929910  | 0.3184733  | -2.1960471 |
| C | 0.3591492  | 1.1648237  | -3.0783816 |
| C | -0.4716144 | 0.5537674  | -4.0442183 |
| C | 0.3671874  | 2.5681511  | -2.9605573 |
| C | -1.2594130 | 1.3569714  | -4.8787578 |
| C | -0.4295540 | 3.3586910  | -3.7887483 |
| C | -1.2446283 | 2.7506767  | -4.7540589 |
| H | 2.5779356  | -4.4916481 | -4.1818817 |
| H | 4.0231771  | -3.3966083 | -2.4579998 |
| H | 0.5093178  | -3.3560685 | -4.9707994 |
| H | 3.3901797  | -1.1724977 | -1.5487291 |
| H | 1.0112263  | 3.0381361  | -2.2114918 |
| H | -1.8970785 | 0.8850572  | -5.6320263 |
| H | -0.4147140 | 4.4467594  | -3.6865423 |
| H | -1.8687978 | 3.3631727  | -5.4099190 |
| H | 0.5352610  | 0.1101342  | -1.1518773 |
| H | 2.0306912  | 0.8690154  | -1.7557378 |
| H | -0.8279081 | -1.2866344 | -5.1230344 |
| H | -1.3251627 | -1.3020198 | -3.4358449 |

|    |            |            |            |
|----|------------|------------|------------|
| Fe | -0.1551138 | -0.0868732 | 1.5385494  |
| O  | 0.0154277  | -0.0160009 | -0.2588974 |
| N  | -0.4131187 | -0.2463606 | 3.8728323  |
| N  | -0.6182836 | -2.0736601 | 1.7827963  |
| N  | -1.7206047 | 1.2127330  | 1.8898245  |
| N  | 1.7088470  | 0.5132768  | 2.2117708  |
| N  | -0.5646674 | -4.2074008 | 0.7439212  |
| N  | -1.7881188 | -2.4731804 | -0.1949378 |
| N  | -3.5615222 | 2.3775064  | 0.9451452  |
| N  | -1.4150805 | 2.7212408  | 0.1359269  |

**$[Fe^{IV}(O)TMG_3tren]^{2+}$ -DHA-IC ( $\sigma$ )**

**E<sub>B3LYP-D3/def2-SVP(Fe:def2-TZVP)/COSMO( $\epsilon$  = 35.88):</sub>**

**-3253.4855233643 (<S<sup>2</sup>> 7.03286810)**

**E<sub>B3LYP-D3/def2-TZVPP/COSMO( $\epsilon$  = 35.88):</sub>**

**-3255.6626558995 (<S<sup>2</sup>> 7.03084143)**

**ZPE<sub>B3LYP-D3/def2-SVP(Fe:def2-TZVP)/COSMO( $\epsilon$  = 35.88):</sub>**

**0.941853**

|   |            |            |            |
|---|------------|------------|------------|
| N | 3.7588499  | 1.6113297  | 1.7769765  |
| N | 3.1993812  | -0.3301192 | 0.6195447  |
| C | -0.9455831 | -1.5989224 | 4.1332681  |
| H | -2.0372406 | -1.5713570 | 4.0117634  |
| H | -0.7335328 | -1.9138551 | 5.1708513  |
| C | -0.3723827 | -2.5931390 | 3.1301073  |
| H | 0.7062152  | -2.7335475 | 3.3195497  |
| H | -0.8504039 | -3.5744061 | 3.2758587  |
| C | -0.9687018 | -2.9052886 | 0.7969226  |
| C | 0.7309428  | -4.6571706 | 1.2362505  |
| H | 1.3788034  | -3.8048982 | 1.4535810  |
| H | 1.2191382  | -5.2704706 | 0.4610218  |
| H | 0.6319385  | -5.2692845 | 2.1479549  |
| C | -1.4135857 | -5.2622056 | 0.1955150  |
| H | -2.4438351 | -4.9035068 | 0.0856410  |
| H | -1.4125014 | -6.1158577 | 0.8923499  |
| H | -1.0502084 | -5.6176243 | -0.7835938 |
| C | -1.5920990 | -2.8522854 | -1.5869471 |
| H | -0.6655363 | -3.4227366 | -1.7079095 |
| H | -1.4963553 | -1.9369621 | -2.1901423 |
| H | -2.4364204 | -3.4433694 | -1.9779024 |
| C | -2.7730554 | -1.4286943 | 0.0219937  |
| H | -2.9542538 | -1.3157132 | 1.0963993  |
| H | -3.7154689 | -1.7106185 | -0.4742771 |
| H | -2.4237093 | -0.4673394 | -0.3854905 |
| C | -1.3576178 | 0.8218677  | 4.2543393  |
| H | -0.7970646 | 1.7605372  | 4.3616747  |
| H | -1.8292645 | 0.6028593  | 5.2292198  |
| C | -2.4066474 | 1.0055749  | 3.1681668  |
| H | -3.0637041 | 0.1195437  | 3.1325307  |
| H | -3.0460361 | 1.8648639  | 3.4230103  |
| C | -2.2314722 | 2.0742619  | 1.0069196  |
| C | -4.6171826 | 1.4041038  | 1.1943133  |
| H | -4.2079248 | 0.3927459  | 1.2501276  |
| H | -5.3381172 | 1.4343011  | 0.3607957  |
| H | -5.1604199 | 1.6203997  | 2.1291807  |
| C | -4.0324702 | 3.7192711  | 0.6108755  |
| H | -3.2052746 | 4.4372325  | 0.6615457  |
| H | -4.7998848 | 4.0176928  | 1.3435746  |
| H | -4.4832752 | 3.7600227  | -0.3950842 |
| C | -1.8027839 | 2.9595869  | -1.2487125 |
| H | -2.7614865 | 2.4755855  | -1.4680778 |
| H | -1.0404601 | 2.5221647  | -1.9069733 |
| H | -1.8800175 | 4.0352598  | -1.4756128 |
| C | -0.0389981 | 3.0511572  | 0.4647497  |
| H | 0.1016701  | 2.9893603  | 1.5502259  |
| H | 0.1774970  | 4.0786343  | 0.1309022  |
| H | 0.6661312  | 2.3618212  | -0.0239075 |

**Chem. Pot.**(298.15)/B3LYP-D3/def2-SVP(Fe: def2-

TZVP)/COSMO( $\epsilon = 35.88$ ):

**0.868414**

|   |            |            |            |
|---|------------|------------|------------|
| C | 0.9307288  | -0.0337062 | 4.4405191  |
| H | 1.4785704  | -0.9860182 | 4.4124818  |
| H | 0.8694221  | 0.2854846  | 5.4968110  |
| C | 1.6888728  | 0.9867630  | 3.6020585  |
| H | 1.2077630  | 1.9766802  | 3.6821509  |
| H | 2.7074256  | 1.0941160  | 4.0043785  |
| C | 2.8628268  | 0.6056372  | 1.5424036  |
| C | 3.3307336  | 2.9713887  | 2.0783851  |
| H | 2.2692890  | 3.0977765  | 1.8447170  |
| H | 3.9073364  | 3.6757353  | 1.4568119  |
| H | 3.4948308  | 3.2326834  | 3.1374041  |
| C | 5.1982820  | 1.3771240  | 1.8695691  |
| H | 5.4098075  | 0.3021645  | 1.9156042  |
| H | 5.5707258  | 1.8362175  | 2.7999944  |
| H | 5.7476545  | 1.8205820  | 1.0225360  |
| C | 4.1220529  | -0.0589110 | -0.4776030 |
| H | 4.1574921  | 1.0158879  | -0.6949543 |
| H | 3.7726424  | -0.5872829 | -1.3746187 |
| H | 5.1424393  | -0.4159497 | -0.2653918 |
| C | 2.6575170  | -1.6801427 | 0.6677117  |
| H | 2.2701027  | -1.8783495 | 1.6730094  |
| H | 3.4564223  | -2.4025548 | 0.4416350  |
| H | 1.8346539  | -1.8056719 | -0.0532202 |
| C | 0.1106971  | -3.4359698 | -4.5798263 |
| C | 1.2537234  | -3.3856055 | -3.7635896 |
| C | -0.5867156 | -2.2585659 | -4.8759508 |
| C | 1.6933720  | -2.1658333 | -3.2637270 |
| C | -0.1679881 | -1.0222681 | -4.3750692 |
| C | 1.0029620  | -0.9600637 | -3.5627610 |
| C | -0.9763756 | 0.2273029  | -4.6380242 |
| C | 1.4762659  | 0.3060223  | -3.0969852 |
| C | 0.8791678  | 1.5413145  | -3.4955849 |
| C | -0.2989486 | 1.5346662  | -4.2987379 |
| C | 1.4489445  | 2.7879996  | -3.1204957 |
| C | -0.8460890 | 2.7516815  | -4.7162348 |
| C | 0.8830453  | 3.9861853  | -3.5386334 |
| C | -0.2671704 | 3.9718916  | -4.3461337 |
| H | -0.2369832 | -4.3918507 | -4.9795081 |
| H | 1.7992965  | -4.3024972 | -3.5259204 |
| H | -1.4820993 | -2.3036029 | -5.5031788 |
| H | 2.5914029  | -2.1246615 | -2.6420709 |
| H | 2.3495182  | 2.7924973  | -2.4994749 |
| H | -1.7479326 | 2.7463585  | -5.3357747 |
| H | 1.3323634  | 4.9369479  | -3.2406421 |
| H | -0.7145516 | 4.9113004  | -4.6804850 |
| H | 0.4644855  | 0.0947860  | -1.1075480 |
| H | 2.3960006  | 0.3444327  | -2.5128604 |
| H | -1.3242127 | 0.2404863  | -5.6850261 |

|   |            |           |            |  |
|---|------------|-----------|------------|--|
| H | -1.9081809 | 0.1620059 | -4.0381194 |  |
|   |            |           |            |  |

### 5.2.4 Cu<sup>III</sup>(OH) pathway (B3LYP-D3)

Method: B3LYP-D3/def2-SVP(Fe:def2-TZVP)/COSMO( $\epsilon = 8.51$ )

|   |            |            |            |                                                                                                                                                                                                                                                                                                                                                                                                                                                                                                                                             |
|---|------------|------------|------------|---------------------------------------------------------------------------------------------------------------------------------------------------------------------------------------------------------------------------------------------------------------------------------------------------------------------------------------------------------------------------------------------------------------------------------------------------------------------------------------------------------------------------------------------|
| C | -1.4118919 | -0.5812107 | 0.1864666  | <p style="text-align: center;"><b>CHD</b></p> <p><b>E</b><sub>B3LYP-D3/def2-SVP/COSMO(<math>\epsilon = 8.51</math>):</sub></p> <p><b>-233.1019473762</b></p> <p><b>E</b><sub>B3LYP-D3/def2-TZVPP/COSMO(<math>\epsilon = 8.51</math>):</sub></p> <p><b>-233.3601352119</b></p> <p><b>ZPE</b><sub>B3LYP-D3/def2-SVP/COSMO(<math>\epsilon = 8.51</math>):</sub></p> <p><b>0.121586</b></p> <p><b>Chem. Pot.</b><sub>(298.15)/B3LYP-D3/def2-SVP/COSMO(<math>\epsilon = 8.51</math>):</sub></p> <p><b>0.094467 (<math>\sigma = 4</math>)</b></p> |
| C | -0.0434186 | -1.2122965 | 0.1868101  |                                                                                                                                                                                                                                                                                                                                                                                                                                                                                                                                             |
| C | 1.0732293  | -0.2003316 | 0.1863369  |                                                                                                                                                                                                                                                                                                                                                                                                                                                                                                                                             |
| C | 0.8702683  | 1.1238559  | 0.1861765  |                                                                                                                                                                                                                                                                                                                                                                                                                                                                                                                                             |
| C | -0.4982046 | 1.7549418  | 0.1859693  |                                                                                                                                                                                                                                                                                                                                                                                                                                                                                                                                             |
| C | -1.6148530 | 0.7429767  | 0.1861132  |                                                                                                                                                                                                                                                                                                                                                                                                                                                                                                                                             |
| H | -2.2710917 | -1.2618718 | 0.1865000  |                                                                                                                                                                                                                                                                                                                                                                                                                                                                                                                                             |
| H | 2.0968466  | -0.5924153 | 0.1862660  |                                                                                                                                                                                                                                                                                                                                                                                                                                                                                                                                             |
| H | 1.7294676  | 1.8045174  | 0.1860200  |                                                                                                                                                                                                                                                                                                                                                                                                                                                                                                                                             |
| H | -2.6384705 | 1.1350598  | 0.1859017  |                                                                                                                                                                                                                                                                                                                                                                                                                                                                                                                                             |
| H | -0.6016943 | 2.4304723  | -0.6874051 |                                                                                                                                                                                                                                                                                                                                                                                                                                                                                                                                             |
| H | -0.6018452 | 2.4309050  | 1.0589932  |                                                                                                                                                                                                                                                                                                                                                                                                                                                                                                                                             |
| H | 0.0601441  | -1.8875561 | 1.0603892  |                                                                                                                                                                                                                                                                                                                                                                                                                                                                                                                                             |
| H | 0.0601620  | -1.8885284 | -0.6860088 |                                                                                                                                                                                                                                                                                                                                                                                                                                                                                                                                             |
| C | -3.5497633 | -0.7663013 | 0.1449849  | <p style="text-align: center;"><b>DHA</b></p> <p><b>E</b><sub>B3LYP-D3/def2-SVP/COSMO(<math>\epsilon = 8.51</math>):</sub></p> <p><b>-540.0245562672</b></p> <p><b>E</b><sub>B3LYP-D3/def2-TZVPP/COSMO(<math>\epsilon = 8.51</math>):</sub></p> <p><b>-540.6059779633</b></p> <p><b>ZPE</b><sub>B3LYP-D3/def2-SVP/COSMO(<math>\epsilon = 8.51</math>):</sub></p> <p><b>0.217245</b></p> <p><b>Chem. Pot.</b><sub>(298.15)/B3LYP-D3/def2-SVP/COSMO(<math>\epsilon = 8.51</math>):</sub></p> <p><b>0.182779 (<math>\sigma = 2</math>)</b></p> |
| C | -3.5567773 | 0.6070146  | 0.4140184  |                                                                                                                                                                                                                                                                                                                                                                                                                                                                                                                                             |
| C | -2.3868223 | -1.3737445 | -0.3421200 |                                                                                                                                                                                                                                                                                                                                                                                                                                                                                                                                             |
| C | -2.4008192 | 1.3647660  | 0.1943482  |                                                                                                                                                                                                                                                                                                                                                                                                                                                                                                                                             |
| C | -1.2286556 | -0.6189297 | -0.5713775 |                                                                                                                                                                                                                                                                                                                                                                                                                                                                                                                                             |
| C | -1.2357311 | 0.7636913  | -0.3005658 |                                                                                                                                                                                                                                                                                                                                                                                                                                                                                                                                             |
| C | 0.0445716  | -1.2368234 | -1.1114020 |                                                                                                                                                                                                                                                                                                                                                                                                                                                                                                                                             |
| C | 0.0302477  | 1.5522147  | -0.5652714 |                                                                                                                                                                                                                                                                                                                                                                                                                                                                                                                                             |
| C | 1.2744365  | 0.7606115  | -0.2189928 |                                                                                                                                                                                                                                                                                                                                                                                                                                                                                                                                             |
| C | 1.2815052  | -0.6220344 | -0.4896593 |                                                                                                                                                                                                                                                                                                                                                                                                                                                                                                                                             |
| C | 2.4063801  | 1.3588709  | 0.3505875  |                                                                                                                                                                                                                                                                                                                                                                                                                                                                                                                                             |
| C | 2.4203645  | -1.3797285 | -0.1854719 |                                                                                                                                                                                                                                                                                                                                                                                                                                                                                                                                             |
| C | 3.5436581  | 0.5982478  | 0.6450835  |                                                                                                                                                                                                                                                                                                                                                                                                                                                                                                                                             |
| C | 3.5506576  | -0.7751246 | 0.3762814  |                                                                                                                                                                                                                                                                                                                                                                                                                                                                                                                                             |
| H | -4.4469757 | -1.3663159 | 0.3205997  |                                                                                                                                                                                                                                                                                                                                                                                                                                                                                                                                             |
| H | -4.4595339 | 1.0875520  | 0.8012734  |                                                                                                                                                                                                                                                                                                                                                                                                                                                                                                                                             |
| H | -2.3769879 | -2.4490740 | -0.5452558 |                                                                                                                                                                                                                                                                                                                                                                                                                                                                                                                                             |
| H | -2.4020015 | 2.4373138  | 0.4119243  |                                                                                                                                                                                                                                                                                                                                                                                                                                                                                                                                             |
| H | 2.3960999  | 2.4314566  | 0.5677378  |                                                                                                                                                                                                                                                                                                                                                                                                                                                                                                                                             |
| H | 2.4210664  | -2.4550667 | -0.3887981 |                                                                                                                                                                                                                                                                                                                                                                                                                                                                                                                                             |
| H | 4.4205132  | 1.0765845  | 1.0902460  |                                                                                                                                                                                                                                                                                                                                                                                                                                                                                                                                             |
| H | 4.4330148  | -1.3773518 | 0.6099908  |                                                                                                                                                                                                                                                                                                                                                                                                                                                                                                                                             |
| H | 0.0656300  | 1.8023954  | -1.6451127 |                                                                                                                                                                                                                                                                                                                                                                                                                                                                                                                                             |
| H | 0.0140610  | 2.5139343  | -0.0301347 |                                                                                                                                                                                                                                                                                                                                                                                                                                                                                                                                             |
| H | 0.0388879  | -2.3294541 | -0.9785348 |                                                                                                                                                                                                                                                                                                                                                                                                                                                                                                                                             |
| H | 0.0804298  | -1.0609377 | -2.2057912 |                                                                                                                                                                                                                                                                                                                                                                                                                                                                                                                                             |

|    |            |            |            |
|----|------------|------------|------------|
| H  | -4.5914508 | 4.4682746  | 0.2429564  |
| C  | -4.5581195 | 3.3890409  | 0.0851513  |
| C  | -4.3662518 | 0.6501713  | -0.3108641 |
| C  | -5.7173026 | 2.6171264  | -0.0899855 |
| C  | -3.3281719 | 2.7365423  | 0.0513946  |
| N  | -3.2938140 | 1.4197824  | -0.1414757 |
| C  | -5.6322476 | 1.2308514  | -0.2914234 |
| H  | -6.6965836 | 3.1009054  | -0.0689424 |
| H  | -6.5145150 | 0.6036505  | -0.4290559 |
| C  | -1.9516227 | 3.3429931  | 0.2045465  |
| O  | -1.7838337 | 4.5402012  | 0.4017165  |
| C  | -4.0152393 | -0.8087789 | -0.4963697 |
| O  | -4.8728425 | -1.6664626 | -0.6719352 |
| N  | -2.6674297 | -0.9940607 | -0.4351969 |
| N  | -0.9843573 | 2.3888821  | 0.0891948  |
| Cu | -1.6215001 | 0.6003844  | -0.1780624 |
| H  | 0.6721552  | 0.3861681  | -0.0965633 |
| O  | -0.0405143 | -0.2586881 | -0.2355506 |
| C  | 0.3909803  | 2.7024101  | 0.1739082  |
| C  | 3.1194402  | 3.2436886  | 0.3364864  |
| C  | 1.0556346  | 2.5391942  | 1.4166303  |
| C  | 1.0870836  | 3.0976284  | -0.9979980 |
| C  | 2.4564370  | 3.3721116  | -0.8871868 |
| C  | 2.4264497  | 2.8246563  | 1.4746113  |
| H  | 3.0204027  | 3.6828425  | -1.7691043 |
| H  | 2.9635035  | 2.7184764  | 2.4195280  |
| H  | 4.1889976  | 3.4619111  | 0.4005928  |
| C  | -2.0644009 | -2.2601409 | -0.5324236 |
| C  | -0.8354024 | -4.7514183 | -0.7305059 |
| C  | -1.9437727 | -3.0646455 | 0.6306780  |
| C  | -1.5322088 | -2.6712047 | -1.7809318 |
| C  | -0.9282154 | -3.9319097 | -1.8585125 |
| C  | -1.3328299 | -4.3177168 | 0.5022249  |
| H  | -0.5201042 | -4.2825443 | -2.8088083 |
| H  | -1.2319138 | -4.9657575 | 1.3752792  |
| H  | -0.3611057 | -5.7337053 | -0.8095369 |
| C  | 0.3734658  | 3.1450718  | -2.3430791 |
| H  | -0.6957686 | 3.3088856  | -2.1426101 |
| C  | 0.8440411  | 4.2904071  | -3.2494858 |
| H  | 0.2140580  | 4.3390503  | -4.1523873 |
| H  | 1.8841485  | 4.1493974  | -3.5862968 |
| H  | 0.7810405  | 5.2620788  | -2.7337295 |
| C  | 0.5006751  | 1.7813151  | -3.0527414 |
| H  | -0.1026087 | 1.7621602  | -3.9753663 |
| H  | 0.1713858  | 0.9556340  | -2.4039756 |
| H  | 1.5513411  | 1.5869687  | -3.3274455 |

**$Cu^{III}(OH)(L)$**

**E**<sub>B3LYP-D3/def2-SVP(Cu:def2-TZVP)/COSMO( $\epsilon = 8.51$ ):</sub>

**-3232.6379302794**

**E**<sub>B3LYP-D3/def2-TZVPP/COSMO( $\epsilon = 8.51$ ):</sub>

**-3234.3954435859**

**ZPE**<sub>B3LYP-D3/def2-SVP(Cu:def2-TZVP)/COSMO( $\epsilon = 8.51$ ):</sub>

**0.635055**

**Chem. Pot.**<sub>(298.15)/B3LYP-D3/def2-SVP(Cu:def2-</sub>

**TZVP)/COSMO( $\epsilon = 8.51$ ):**

**0.572492**

|    |            |            |            |                                                                                       |
|----|------------|------------|------------|---------------------------------------------------------------------------------------|
| C  | 0.2798924  | 2.1009260  | 2.6511548  |                                                                                       |
| H  | -0.6109085 | 1.5593712  | 2.2963247  |                                                                                       |
| C  | -0.2169240 | 3.3326637  | 3.4326384  |                                                                                       |
| H  | -0.7985010 | 4.0061723  | 2.7845030  |                                                                                       |
| H  | 0.6368493  | 3.9039550  | 3.8350562  |                                                                                       |
| H  | -0.8526470 | 3.0261983  | 4.2800274  |                                                                                       |
| C  | 1.0606598  | 1.1351232  | 3.5519104  |                                                                                       |
| H  | 1.9236974  | 1.6228458  | 4.0338986  |                                                                                       |
| H  | 1.4302220  | 0.2694522  | 2.9793539  |                                                                                       |
| H  | 0.4069098  | 0.7574201  | 4.3544211  |                                                                                       |
| C  | -1.6614556 | -1.7702508 | -2.9997942 |                                                                                       |
| H  | -1.7296640 | -0.7370125 | -2.6268178 |                                                                                       |
| C  | -2.9710355 | -2.0742426 | -3.7534197 |                                                                                       |
| H  | -3.8416994 | -2.0121265 | -3.0824724 |                                                                                       |
| H  | -2.9448436 | -3.0928462 | -4.1767686 |                                                                                       |
| H  | -3.1178449 | -1.3633650 | -4.5838925 |                                                                                       |
| C  | -0.4467585 | -1.8256602 | -3.9343416 |                                                                                       |
| H  | -0.3542652 | -2.8016763 | -4.4386186 |                                                                                       |
| H  | 0.4856053  | -1.6334128 | -3.3804633 |                                                                                       |
| H  | -0.5412170 | -1.0590580 | -4.7204253 |                                                                                       |
| C  | -2.4018099 | -2.5379158 | 1.9844609  |                                                                                       |
| H  | -3.2071825 | -1.8111545 | 1.8002221  |                                                                                       |
| C  | -2.9757067 | -3.6191162 | 2.9095309  |                                                                                       |
| H  | -3.3896804 | -3.1553805 | 3.8196286  |                                                                                       |
| H  | -2.2043266 | -4.3370187 | 3.2333532  |                                                                                       |
| H  | -3.7818047 | -4.1847469 | 2.4150344  |                                                                                       |
| C  | -1.2462756 | -1.7753649 | 2.6647697  |                                                                                       |
| H  | -1.5926638 | -1.2773194 | 3.5855903  |                                                                                       |
| H  | -0.8149187 | -1.0200316 | 1.9910059  |                                                                                       |
| H  | -0.4352141 | -2.4720281 | 2.9369674  |                                                                                       |
| H  | -5.6005232 | 0.6614407  | 0.2148683  |                                                                                       |
| C  | -4.8489285 | -0.1264355 | 0.1436797  |                                                                                       |
| C  | -2.8623194 | -2.0551515 | -0.0356155 |                                                                                       |
| C  | -5.1883214 | -1.4860209 | 0.0608206  |                                                                                       |
| C  | -3.4974280 | 0.2103917  | 0.1315114  |                                                                                       |
| N  | -2.5860223 | -0.7556419 | 0.0436161  |                                                                                       |
| C  | -4.1920219 | -2.4704215 | -0.0304670 |                                                                                       |
| H  | -6.2401345 | -1.7812832 | 0.0675964  |                                                                                       |
| H  | -4.4243659 | -3.5346193 | -0.0952409 |                                                                                       |
| C  | -2.8829185 | 1.5905829  | 0.2004972  |                                                                                       |
| O  | -3.5671122 | 2.6032761  | 0.2880538  |                                                                                       |
| C  | -1.6192813 | -2.9132927 | -0.1174323 |                                                                                       |
| O  | -1.6786894 | -4.1346263 | -0.2072969 |                                                                                       |
| N  | -0.4973678 | -2.1437184 | -0.0774817 |                                                                                       |
| N  | -1.5215597 | 1.5233419  | 0.1476124  |                                                                                       |
| Cu | -0.7945695 | -0.2439196 | 0.0387739  |                                                                                       |
| H  | 1.1307696  | 1.0722061  | 0.2067431  |                                                                                       |
|    |            |            |            | <b><i>Cu<sup>III</sup>(OH)(L)-CHD-RC</i></b>                                          |
|    |            |            |            | <b>E<sub>B3LYP-D3/def2-SVP(Cu:def2-TZVP)/COSMO(ε = 8.51):</sub></b>                   |
|    |            |            |            | <b>-3465.7587837766</b>                                                               |
|    |            |            |            | <b>E<sub>B3LYP-D3/def2-TZVPP/COSMO(ε = 8.51):</sub></b>                               |
|    |            |            |            | <b>-3467.7693930849</b>                                                               |
|    |            |            |            | <b>ZPE<sub>B3LYP-D3/def2-SVP(Cu:def2-TZVP)/COSMO(ε = 8.51):</sub></b>                 |
|    |            |            |            | <b>0.758544</b>                                                                       |
|    |            |            |            | <b>Chem. Pot.<sub>(298.15)/B3LYP-D3/def2-SVP(Cu:def2-TZVP)/COSMO(ε = 8.51):</sub></b> |
|    |            |            |            | <b>0.689108</b>                                                                       |

|   |            |            |            |
|---|------------|------------|------------|
| O | 0.9556485  | 0.1361354  | 0.0202690  |
| H | 3.1936322  | -0.9129435 | 0.5173071  |
| C | -0.7267257 | 2.6930260  | 0.1683935  |
| C | 0.8412114  | 4.9955490  | 0.2193820  |
| C | -0.2059165 | 3.1468405  | 1.4056055  |
| C | -0.4262975 | 3.3501397  | -1.0524983 |
| C | 0.3542616  | 4.5120854  | -0.9980263 |
| C | 0.5722423  | 4.3122234  | 1.4069009  |
| H | 0.6004226  | 5.0433925  | -1.9197405 |
| H | 0.9785789  | 4.6918646  | 2.3467320  |
| H | 1.4517035  | 5.9023670  | 0.2394281  |
| C | 0.8011765  | -2.6816459 | -0.1177931 |
| C | 3.3776113  | -3.7368357 | -0.2110623 |
| C | 1.4198975  | -3.1018905 | 1.0882904  |
| C | 1.4851544  | -2.7282865 | -1.3591252 |
| C | 2.7747593  | -3.2724520 | -1.3824460 |
| C | 2.7087972  | -3.6429038 | 1.0127590  |
| H | 3.3224945  | -3.3312527 | -2.3251565 |
| H | 3.2101382  | -3.9814034 | 1.9219182  |
| H | 4.3865044  | -4.1571150 | -0.2482168 |
| C | 3.9621855  | 1.3190852  | -1.6142119 |
| C | 4.1791510  | 0.1138851  | -1.0725277 |
| C | 3.5319794  | 2.5200527  | -0.8133457 |
| H | 2.5358850  | 2.8618097  | -1.1565427 |
| H | 4.1967232  | 3.3819331  | -1.0230074 |
| C | 4.0122305  | -0.1819012 | 0.3923445  |
| H | 4.9148225  | -0.6878062 | 0.7886821  |
| C | 3.4837299  | 2.2533309  | 0.6689928  |
| C | 3.7003799  | 1.0444127  | 1.2053455  |
| C | -0.8712302 | 2.7553911  | -2.3822411 |
| H | -1.7491327 | 2.1232287  | -2.1820056 |
| C | -1.2954685 | 3.8068160  | -3.4161029 |
| H | -1.7073159 | 3.3116890  | -4.3104754 |
| H | -0.4446960 | 4.4236627  | -3.7492998 |
| H | -2.0671190 | 4.4806193  | -3.0101424 |
| C | 0.2342094  | 1.8335172  | -2.9379697 |
| H | -0.1168514 | 1.3024452  | -3.8381858 |
| H | 0.5525981  | 1.0878138  | -2.1939624 |
| H | 1.1242743  | 2.4224441  | -3.2167223 |
| C | -0.5168760 | 2.3960423  | 2.6933208  |
| H | -0.7689150 | 1.3621848  | 2.4088177  |
| C | -1.7586774 | 2.9975152  | 3.3786935  |
| H | -2.6167197 | 3.0292376  | 2.6898268  |
| H | -1.5532609 | 4.0295792  | 3.7104557  |
| H | -2.0412881 | 2.4043766  | 4.2644993  |
| C | 0.6782445  | 2.3167675  | 3.6525213  |
| H | 0.9440499  | 3.3031879  | 4.0665457  |
| H | 1.5641813  | 1.9066397  | 3.1437754  |

|   |            |            |            |
|---|------------|------------|------------|
| H | 0.4362519  | 1.6583734  | 4.5023565  |
| C | 0.8047694  | -2.2327707 | -2.6265627 |
| H | 0.0583780  | -1.4857471 | -2.3159161 |
| C | 0.0459078  | -3.3858467 | -3.3118802 |
| H | -0.6518417 | -3.8761130 | -2.6155588 |
| H | 0.7535603  | -4.1515212 | -3.6733047 |
| H | -0.5270036 | -3.0155547 | -4.1787102 |
| C | 1.7590211  | -1.5265648 | -3.5974564 |
| H | 2.4956514  | -2.2212518 | -4.0341902 |
| H | 2.3026328  | -0.7162835 | -3.0890509 |
| H | 1.1880136  | -1.0890960 | -4.4325366 |
| C | 0.7298217  | -2.8858578 | 2.4283124  |
| H | -0.3532419 | -2.8429072 | 2.2387393  |
| C | 0.9680368  | -4.0176498 | 3.4366701  |
| H | 0.3570337  | -3.8542197 | 4.3393720  |
| H | 2.0204434  | -4.0656144 | 3.7614914  |
| H | 0.6976590  | -4.9977573 | 3.0115945  |
| C | 1.1442131  | -1.5175974 | 3.0084660  |
| H | 0.5716753  | -1.2898910 | 3.9231998  |
| H | 0.9866487  | -0.7132251 | 2.2749186  |
| H | 2.2167638  | -1.5196299 | 3.2673384  |
| H | 3.2312435  | 3.1000798  | 1.3153772  |
| H | 4.0755677  | 1.4584822  | -2.6954852 |
| H | 4.4657886  | -0.7269278 | -1.7127782 |
| H | 3.6277427  | 0.9129575  | 2.2910086  |

|    |            |            |            |
|----|------------|------------|------------|
| H  | -4.5541131 | 4.2849085  | 0.2774878  |
| C  | -4.4939981 | 3.2048436  | 0.1344291  |
| C  | -4.2434479 | 0.4614889  | -0.2264294 |
| C  | -5.6361690 | 2.4022472  | -0.0188835 |
| C  | -3.2490776 | 2.5778272  | 0.0977112  |
| N  | -3.1911410 | 1.2607997  | -0.0764908 |
| C  | -5.5235564 | 1.0148506  | -0.2029209 |
| H  | -6.6261676 | 2.8641844  | 0.0046877  |
| H  | -6.3947608 | 0.3694422  | -0.3258161 |
| C  | -1.8813646 | 3.2247618  | 0.2334747  |
| O  | -1.7625064 | 4.4347713  | 0.4150628  |
| C  | -3.8648500 | -0.9997946 | -0.4127346 |
| O  | -4.7276992 | -1.8610856 | -0.5865600 |
| N  | -2.5230059 | -1.1647042 | -0.3624197 |
| N  | -0.8847735 | 2.3070777  | 0.1301551  |
| Cu | -1.4684010 | 0.4654045  | -0.1186066 |
| H  | 0.8897979  | 0.3446085  | -0.0388912 |
| O  | 0.2105170  | -0.3424093 | -0.1587056 |
| H  | 1.1184765  | -1.4230456 | -0.1712464 |
| C  | 0.4790496  | 2.6608034  | 0.2241937  |
| C  | 3.2079509  | 3.2346487  | 0.4009475  |
| C  | 1.1480276  | 2.4940109  | 1.4663929  |

***Cu<sup>III</sup>(OH)(L)-CHD-TS***

**E<sub>B3LYP-D3/def2-SVP(Cu:def2-TZVP)/COSMO(ε = 8.51)</sub>:**

**-3465.7410374778 (<S<sup>2</sup>> 0.43940638)**

**E<sub>B3LYP-D3/def2-TZVPP/COSMO(ε = 8.51)</sub>:**

**-3467.7497649775 (S = 0; <S<sup>2</sup>> 0.45695148)**

**-3467.7361455118 (S = 1; <S<sup>2</sup>> 2.01530241)**

**-3467.7537981851 (spin purified)**

**ZPE<sub>B3LYP-D3/def2-SVP(Cu:def2-TZVP)/COSMO(ε = 8.51)</sub>:**

**0.75227**

**Chem. Pot.<sub>(298.15)/B3LYP-D3/def2-SVP(Cu:def2-</sub>**

**TZVP)/COSMO(ε = 8.51):**

**0.683264**



|   |            |            |            |
|---|------------|------------|------------|
| C | 1.1811552  | 3.0660101  | -0.9417729 |
| C | 2.5463169  | 3.3573109  | -0.8247179 |
| C | 2.5146104  | 2.7963539  | 1.5320598  |
| H | 3.1097518  | 3.6772378  | -1.7036365 |
| H | 3.0500277  | 2.6846584  | 2.4769820  |
| H | 4.2721551  | 3.4747139  | 0.4723679  |
| C | -1.8976127 | -2.4204931 | -0.5240804 |
| C | -0.5184284 | -4.8304938 | -0.8315628 |
| C | -1.6908182 | -3.2504120 | 0.6054380  |
| C | -1.3834659 | -2.7701502 | -1.7977267 |
| C | -0.7011348 | -3.9867598 | -1.9301743 |
| C | -1.0030901 | -4.4588166 | 0.4249888  |
| H | -0.3012646 | -4.2823056 | -2.9026409 |
| H | -0.8317730 | -5.1180356 | 1.2788883  |
| H | 0.0178074  | -5.7760209 | -0.9522149 |
| C | 3.9046477  | -0.8295338 | -1.2914355 |
| C | 2.8887211  | -1.7189776 | -1.3364154 |
| C | 4.3759009  | -0.2148280 | -0.0062814 |
| H | 4.1320325  | 0.8731416  | -0.0099595 |
| H | 5.4824135  | -0.2270727 | 0.0497969  |
| C | 2.1393062  | -2.1048591 | -0.1274066 |
| H | 1.6763987  | -3.1030909 | -0.1558318 |
| C | 3.7771308  | -0.8396076 | 1.2194376  |
| C | 2.7627838  | -1.7290395 | 1.1547580  |
| C | 0.4762533  | 3.1001787  | -2.2922811 |
| H | -0.5926844 | 3.2756450  | -2.1001090 |
| C | 0.9618066  | 4.2265832  | -3.2143180 |
| H | 0.3338969  | 4.2702848  | -4.1189438 |
| H | 2.0006354  | 4.0682675  | -3.5478264 |
| H | 0.9103648  | 5.2063824  | -2.7128274 |
| C | 0.5992008  | 1.7262057  | -2.9822357 |
| H | 0.0216970  | 1.7044223  | -3.9211141 |
| H | 0.2385570  | 0.9122106  | -2.3362815 |
| H | 1.6536442  | 1.5079172  | -3.2218893 |
| C | 0.3755118  | 2.0252260  | 2.6919969  |
| H | -0.4734614 | 1.4272934  | 2.3238857  |
| C | -0.2137772 | 3.2325654  | 3.4469305  |
| H | -0.8136361 | 3.8674903  | 2.7772379  |
| H | 0.5951254  | 3.8545071  | 3.8669336  |
| H | -0.8542004 | 2.8974479  | 4.2799173  |
| C | 1.1913421  | 1.1195309  | 3.6232279  |
| H | 2.0025527  | 1.6684309  | 4.1293647  |
| H | 1.6400249  | 0.2820494  | 3.0665460  |
| H | 0.5398872  | 0.7016562  | 4.4075613  |
| C | -1.5997358 | -1.8440067 | -2.9866112 |
| H | -1.7055899 | -0.8257792 | -2.5802982 |
| C | -2.9212492 | -2.1877392 | -3.7008986 |
| H | -3.7658284 | -2.1859834 | -2.9948392 |

|   |            |            |            |
|---|------------|------------|------------|
| H | -2.8629591 | -3.1917381 | -4.1552848 |
| H | -3.1338345 | -1.4619718 | -4.5040211 |
| C | -0.4208384 | -1.8110978 | -3.9668735 |
| H | -0.2900887 | -2.7701767 | -4.4945628 |
| H | 0.5194191  | -1.5732140 | -3.4451529 |
| H | -0.5883048 | -1.0366310 | -4.7328506 |
| C | -2.1298979 | -2.7896636 | 1.9900276  |
| H | -2.9679450 | -2.0903683 | 1.8521069  |
| C | -2.6326528 | -3.9258397 | 2.8907509  |
| H | -3.0396983 | -3.5135366 | 3.8284976  |
| H | -1.8240556 | -4.6226504 | 3.1669174  |
| H | -3.4284643 | -4.5067976 | 2.3972778  |
| C | -0.9871922 | -2.0063701 | 2.6674600  |
| H | -1.3180838 | -1.5757658 | 3.6272999  |
| H | -0.6212779 | -1.1930382 | 2.0237834  |
| H | -0.1315217 | -2.6733050 | 2.8693421  |
| H | 4.1861918  | -0.5405394 | 2.1895885  |
| H | 4.4142297  | -0.5279306 | -2.2122288 |
| H | 2.5653095  | -2.1367205 | -2.2946642 |
| H | 2.3383734  | -2.1472372 | 2.0726452  |

|    |            |            |            |
|----|------------|------------|------------|
| H  | -5.6350037 | 0.6334916  | 0.1156344  |
| C  | -4.8692619 | -0.1428896 | 0.0786549  |
| C  | -2.8542054 | -2.0556115 | -0.0111695 |
| C  | -5.1884272 | -1.5102788 | 0.0397452  |
| C  | -3.5192094 | 0.2106216  | 0.0683501  |
| N  | -2.6022805 | -0.7508767 | 0.0244800  |
| C  | -4.1811119 | -2.4881283 | -0.0063115 |
| H  | -6.2370244 | -1.8181983 | 0.0456792  |
| H  | -4.4057748 | -3.5553945 | -0.0372022 |
| C  | -2.9266706 | 1.6155589  | 0.1060172  |
| O  | -3.6615417 | 2.6043589  | 0.1660961  |
| C  | -1.5963731 | -2.9173352 | -0.0569374 |
| O  | -1.6805845 | -4.1458426 | -0.1217785 |
| N  | -0.4780473 | -2.1588385 | -0.0212242 |
| N  | -1.5763965 | 1.5812960  | 0.0708124  |
| Cu | -0.7548346 | -0.2089510 | 0.0128192  |
| H  | 1.4682021  | 1.1775018  | 0.3428811  |
| O  | 1.1539774  | 0.3582065  | -0.0774911 |
| H  | 1.8799707  | -0.2876683 | -0.0122448 |
| C  | -0.7819774 | 2.7505807  | 0.1080625  |
| C  | 0.9593918  | 4.9413607  | 0.1753610  |
| C  | -0.1815063 | 3.1298579  | 1.3365637  |
| C  | -0.4910960 | 3.4466413  | -1.0929370 |
| C  | 0.3782957  | 4.5451369  | -1.0322705 |
| C  | 0.6840149  | 4.2343193  | 1.3469217  |
| H  | 0.6171057  | 5.0983089  | -1.9429559 |
| H  | 1.1516102  | 4.5483058  | 2.2824917  |

***Cu<sup>III</sup>(OH)(L)-CHD-IC***

**E<sub>B3LYP-D3/def2-SVP(Cu:def2-TZVP)/COSMO(ε = 8.51):</sub>**

**-3465.7828945679 (<S> 1.04071524)**

**E<sub>B3LYP-D3/def2-TZVPP/COSMO(ε = 8.51):</sub>**

**-3467.7910857678 (S = 0, <S<sup>2</sup>> 1.03901619)**

**-3467.7911092310 (S = 1; <S<sup>2</sup>> 2.03915370)**

**-3467.7910603994 (spin purified)**

**ZPE<sub>B3LYP-D3/def2-SVP(Cu:def2-TZVP)/COSMO(ε = 8.51):</sub>**

**0.756091**

**Chem. Pot.<sub>(298.15)/B3LYP-D3/def2-SVP(Cu:def2-</sub>**

**TZVP)/COSMO(ε = 8.51):**

**0.686013**

|   |            |            |            |
|---|------------|------------|------------|
| H | 1.6381916  | 5.7981312  | 0.2002059  |
| C | 0.8189780  | -2.7213181 | -0.0781296 |
| C | 3.4462317  | -3.6798236 | -0.1900442 |
| C | 1.4646362  | -3.1279323 | 1.1180256  |
| C | 1.4988630  | -2.7542876 | -1.3225686 |
| C | 2.8119630  | -3.2467655 | -1.3555036 |
| C | 2.7780722  | -3.6115099 | 1.0354141  |
| H | 3.3498977  | -3.2908345 | -2.3050466 |
| H | 3.2955255  | -3.9339153 | 1.9413139  |
| H | 4.4708486  | -4.0591400 | -0.2334089 |
| C | 4.0010692  | 1.1896667  | -1.5107372 |
| C | 4.2698093  | 0.0022139  | -0.8774553 |
| C | 3.6393911  | 2.4332795  | -0.7525086 |
| H | 2.6660503  | 2.8370654  | -1.1111942 |
| H | 4.3430664  | 3.2563071  | -1.0097701 |
| C | 4.2120292  | -0.1128215 | 0.5403641  |
| H | 4.4107972  | -1.0729660 | 1.0198438  |
| C | 3.6017745  | 2.2419689  | 0.7381035  |
| C | 3.8842402  | 1.0328688  | 1.3236043  |
| C | -1.0528976 | 2.9503446  | -2.4205177 |
| H | -2.0233507 | 2.4776199  | -2.2074101 |
| C | -1.3096918 | 4.0666702  | -3.4415785 |
| H | -1.8321928 | 3.6593979  | -4.3222654 |
| H | -0.3717783 | 4.5205834  | -3.8020505 |
| H | -1.9327289 | 4.8680477  | -3.0129868 |
| C | -0.1298793 | 1.8673427  | -3.0142204 |
| H | -0.5595015 | 1.4448585  | -3.9374661 |
| H | 0.0384252  | 1.0429091  | -2.3063165 |
| H | 0.8581831  | 2.2925489  | -3.2593044 |
| C | -0.5154492 | 2.3670149  | 2.6131197  |
| H | -0.7527012 | 1.3322559  | 2.3154390  |
| C | -1.7880679 | 2.9449353  | 3.2620266  |
| H | -2.6206129 | 2.9780970  | 2.5428975  |
| H | -1.6040891 | 3.9745149  | 3.6137023  |
| H | -2.0965372 | 2.3375000  | 4.1294226  |
| C | 0.6426793  | 2.2929445  | 3.6160682  |
| H | 0.8758251  | 3.2769172  | 4.0546485  |
| H | 1.5599477  | 1.9069131  | 3.1430053  |
| H | 0.3802898  | 1.6182336  | 4.4466082  |
| C | 0.7912366  | -2.2944587 | -2.5910062 |
| H | 0.0159126  | -1.5754693 | -2.2813235 |
| C | 0.0624465  | -3.4785423 | -3.2544151 |
| H | -0.6134936 | -3.9749797 | -2.5410629 |
| H | 0.7904220  | -4.2278882 | -3.6097378 |
| H | -0.5292608 | -3.1394906 | -4.1213773 |
| C | 1.7094751  | -1.5637118 | -3.5791713 |
| H | 2.4647967  | -2.2349611 | -4.0199253 |
| H | 2.2365610  | -0.7301462 | -3.0880692 |

|   |            |            |            |
|---|------------|------------|------------|
| H | 1.1157735  | -1.1489922 | -4.4098237 |
| C | 0.7596175  | -2.9631073 | 2.4599307  |
| H | -0.3191445 | -3.0825025 | 2.2782565  |
| C | 1.1619327  | -4.0095138 | 3.5073605  |
| H | 0.5261672  | -3.9117375 | 4.4021568  |
| H | 2.2068187  | -3.8842205 | 3.8362220  |
| H | 1.0490142  | -5.0331778 | 3.1159412  |
| C | 0.9816089  | -1.5366490 | 3.0012402  |
| H | 0.4188942  | -1.3732510 | 3.9348769  |
| H | 0.6592041  | -0.7741826 | 2.2766138  |
| H | 2.0506439  | -1.3615641 | 3.2087538  |
| H | 3.3433192  | 3.1068464  | 1.3537257  |
| H | 4.0382725  | 1.2510515  | -2.6022171 |
| H | 4.5130410  | -0.8845504 | -1.4679371 |
| H | 3.8436239  | 0.9377076  | 2.4129548  |

|    |            |            |            |
|----|------------|------------|------------|
| H  | -4.5464764 | 4.1601746  | 0.7504300  |
| C  | -4.4415490 | 3.0858214  | 0.5908648  |
| C  | -4.0679394 | 0.3690299  | 0.1734432  |
| C  | -5.5429190 | 2.2157674  | 0.5705728  |
| C  | -3.1750766 | 2.5397722  | 0.3975705  |
| N  | -3.0520745 | 1.2277236  | 0.2068730  |
| C  | -5.3658864 | 0.8399240  | 0.3585056  |
| H  | -6.5490532 | 2.6145147  | 0.7194862  |
| H  | -6.2015569 | 0.1386964  | 0.3331436  |
| C  | -1.8467382 | 3.2600583  | 0.3809792  |
| O  | -1.7589486 | 4.4683799  | 0.5693154  |
| C  | -3.6222695 | -1.0532647 | -0.0789864 |
| O  | -4.4185185 | -1.9812769 | -0.1488699 |
| N  | -2.2666396 | -1.1209924 | -0.2050834 |
| N  | -0.8235390 | 2.3906748  | 0.1468223  |
| Cu | -1.3385886 | 0.5615692  | -0.1017983 |
| H  | 0.9195291  | 0.5606700  | -0.6555938 |
| O  | 0.2678481  | -0.1411951 | -0.5025869 |
| H  | 1.2664654  | -2.2732157 | -0.5511717 |
| C  | 0.5269902  | 2.8011906  | 0.1953676  |
| C  | 3.1844199  | 3.6269011  | 0.2844596  |
| C  | 1.1940017  | 2.8427182  | 1.4459793  |
| C  | 1.2002163  | 3.0938063  | -1.0181529 |
| C  | 2.5324816  | 3.5186861  | -0.9461696 |
| C  | 2.5246003  | 3.2791013  | 1.4653716  |
| H  | 3.0748639  | 3.7591864  | -1.8623849 |
| H  | 3.0594674  | 3.3399638  | 2.4159711  |
| H  | 4.2243861  | 3.9625233  | 0.3211905  |
| C  | -1.6019392 | -2.3387459 | -0.4366067 |
| C  | -0.3444976 | -4.7793637 | -0.9067792 |
| C  | -1.2476261 | -3.1580556 | 0.6699511  |
| C  | -1.2775472 | -2.7050916 | -1.7656093 |

***Cu<sup>III</sup>(OH)(L)-DHA-RC***

**E**<sub>B3LYP-D3/def2-SVP(Cu:def2-TZVP)/COSMO( $\epsilon = 8.51$ ):</sub>

**-3772.6905852519**

**E**<sub>B3LYP-D3/def2-TZVPP/COSMO( $\epsilon = 8.51$ ):</sub>

**-3775.0223000453**

**ZPE**<sub>B3LYP-D3/def2-SVP(Cu:def2-TZVP)/COSMO( $\epsilon = 8.51$ ):</sub>

**0.854417**

**Chem. Pot.**<sub>(298.15)/B3LYP-D3/def2-SVP(Cu:def2-</sub>

**TZVP)/COSMO( $\epsilon = 8.51$ ):**

**0.781454**

|   |            |            |            |
|---|------------|------------|------------|
| C | -0.6541352 | -3.9414808 | -1.9782999 |
| C | -0.6302060 | -4.3846160 | 0.4045153  |
| H | -0.3988277 | -4.2496556 | -2.9954129 |
| H | -0.3538488 | -5.0428544 | 1.2290998  |
| H | 0.1436081  | -5.7407197 | -1.0895835 |
| H | 4.6859693  | 1.4498864  | -0.8672130 |
| C | 4.2969817  | 0.5722047  | -1.3886505 |
| C | 3.2936027  | -1.6634311 | -2.7091318 |
| C | 3.5951042  | -0.3996016 | -0.6607491 |
| C | 4.4873874  | 0.4396345  | -2.7667638 |
| C | 3.9777361  | -0.6816676 | -3.4317125 |
| C | 3.0957629  | -1.5354812 | -1.3263613 |
| H | 5.0281321  | 1.2117830  | -3.3208600 |
| H | 4.1174300  | -0.7937578 | -4.5105984 |
| H | 2.8988859  | -2.5440653 | -3.2245228 |
| C | 3.3254596  | -0.2322284 | 0.8186576  |
| H | 2.3563560  | 0.2866314  | 0.9316357  |
| H | 4.0720589  | 0.4326372  | 1.2793945  |
| C | 2.3290021  | -2.5748543 | -0.5452103 |
| H | 2.3761038  | -3.5530072 | -1.0459778 |
| C | 3.2381257  | -1.5434534 | 1.5660122  |
| C | 2.7660680  | -2.6879182 | 0.8957219  |
| C | 3.5769610  | -1.6297058 | 2.9245960  |
| H | 3.9430074  | -0.7376735 | 3.4421684  |
| C | 3.4486807  | -2.8349819 | 3.6218386  |
| H | 3.7116884  | -2.8848933 | 4.6821704  |
| C | 2.6596421  | -3.8980438 | 1.5966976  |
| H | 2.2962653  | -4.7859625 | 1.0725610  |
| C | 2.9911214  | -3.9763152 | 2.9526602  |
| H | 2.8939283  | -4.9263055 | 3.4856989  |
| C | 0.4664402  | 2.9789145  | -2.3474937 |
| H | -0.3617858 | 2.2687138  | -2.1954734 |
| C | -0.1601599 | 4.3340414  | -2.7276762 |
| H | -0.7703104 | 4.2398180  | -3.6414945 |
| H | 0.6277346  | 5.0825049  | -2.9184978 |
| H | -0.7995342 | 4.7174225  | -1.9172605 |
| C | 1.3396245  | 2.4159850  | -3.4766575 |
| H | 0.7246073  | 2.2381347  | -4.3737527 |
| H | 1.8076290  | 1.4626210  | -3.1864272 |
| H | 2.1445858  | 3.1123702  | -3.7636404 |
| C | 0.4763260  | 2.4523494  | 2.7315031  |
| H | -0.4296767 | 1.8973748  | 2.4416359  |
| C | 0.0243064  | 3.7093597  | 3.4989612  |
| H | -0.5946622 | 4.3581404  | 2.8608429  |
| H | 0.8985028  | 4.2925016  | 3.8352582  |
| H | -0.5622186 | 3.4314698  | 4.3905914  |
| C | 1.3060135  | 1.5147400  | 3.6221541  |
| H | 2.2220781  | 2.0014818  | 3.9947888  |

|   |            |            |            |
|---|------------|------------|------------|
| H | 1.5994057  | 0.6011451  | 3.0838029  |
| H | 0.7147725  | 1.2104404  | 4.5010658  |
| C | -1.5814483 | -1.7825133 | -2.9360256 |
| H | -2.0384764 | -0.8708217 | -2.5240173 |
| C | -2.6026665 | -2.4118982 | -3.8985588 |
| H | -3.5317424 | -2.6767366 | -3.3680092 |
| H | -2.2041509 | -3.3290580 | -4.3639471 |
| H | -2.8564428 | -1.7081478 | -4.7088364 |
| C | -0.2914186 | -1.3515072 | -3.6541852 |
| H | 0.2195616  | -2.2108177 | -4.1196559 |
| H | 0.4020805  | -0.8829606 | -2.9408323 |
| H | -0.5196569 | -0.6252196 | -4.4524135 |
| C | -1.4999174 | -2.6768153 | 2.0938905  |
| H | -2.4274763 | -2.0832784 | 2.0748997  |
| C | -1.7097027 | -3.8112269 | 3.1050605  |
| H | -2.0113026 | -3.3945764 | 4.0796754  |
| H | -0.7832411 | -4.3852608 | 3.2710338  |
| H | -2.4925052 | -4.5126210 | 2.7740434  |
| C | -0.3616693 | -1.7435134 | 2.5570955  |
| H | -0.6142257 | -1.2726506 | 3.5214678  |
| H | -0.1566232 | -0.9524069 | 1.8222657  |
| H | 0.5745732  | -2.3081925 | 2.6833516  |

|    |            |            |            |
|----|------------|------------|------------|
| H  | -4.3875996 | 4.4701506  | 0.2489433  |
| C  | -4.3593110 | 3.3876107  | 0.1150968  |
| C  | -4.1860775 | 0.6369454  | -0.2203201 |
| C  | -5.5252901 | 2.6099770  | 0.0289681  |
| C  | -3.1319236 | 2.7322152  | 0.0251228  |
| N  | -3.1094614 | 1.4123869  | -0.1359735 |
| C  | -5.4514278 | 1.2184342  | -0.1402512 |
| H  | -6.5025811 | 3.0942085  | 0.0956312  |
| H  | -6.3406513 | 0.5898146  | -0.2089130 |
| C  | -1.7469194 | 3.3484558  | 0.0989489  |
| O  | -1.5897588 | 4.5535414  | 0.2757332  |
| C  | -3.8543843 | -0.8333286 | -0.4030641 |
| O  | -4.7487977 | -1.6751256 | -0.5051181 |
| N  | -2.5176383 | -1.0352918 | -0.4418602 |
| N  | -0.7767173 | 2.4064244  | -0.0484987 |
| Cu | -1.4024211 | 0.5727944  | -0.2317894 |
| H  | 0.9630622  | 0.4262429  | -0.2232260 |
| O  | 0.2786995  | -0.2657232 | -0.2465541 |
| H  | 1.1085046  | -1.3457375 | -0.2381851 |
| C  | 0.5916628  | 2.7557385  | 0.0288514  |
| C  | 3.3197325  | 3.3579891  | 0.1709745  |
| C  | 1.2145185  | 2.8702342  | 1.2983607  |
| C  | 1.3392494  | 2.8946390  | -1.1686916 |
| C  | 2.7064147  | 3.1932184  | -1.0712686 |
| C  | 2.5771422  | 3.1909457  | 1.3438947  |

***Cu<sup>III</sup>(OH)(L)-DHA-TS***

**E<sub>B3LYP-D3/def2-SVP(Cu:def2-TZVP)/COSMO(ε = 8.51):</sub>**

**-3772.6706428579 (<S<sup>2</sup>> 0.47252884)**

**E<sub>B3LYP-D3/def2-TZVPP/COSMO(ε = 8.51):</sub>**

**-3775.0009736851 (S = 0; <S<sup>2</sup>> 0.49819223)**

**-3774.9891593620 (S = 1; <S<sup>2</sup>> 2.01620343)**

**-3775.0048928311 (spin purified)**

**ZPE<sub>B3LYP-D3/def2-SVP(Cu:def2-TZVP)/COSMO(ε = 8.51):</sub>**

**0.84792**

**Chem. Pot.<sub>(298.15)/B3LYP-D3/def2-SVP(Cu:def2-</sub>**

**TZVP)/COSMO(ε = 8.51):**

**0.775156**

|   |            |            |            |
|---|------------|------------|------------|
| H | 3.3019439  | 3.2902012  | -1.9822314 |
| H | 3.0762396  | 3.2847765  | 2.3117835  |
| H | 4.3860725  | 3.5922905  | 0.2280792  |
| C | -1.9472513 | -2.3157400 | -0.6129496 |
| C | -0.6670144 | -4.7740402 | -0.9514674 |
| C | -1.8455493 | -3.2000167 | 0.4912270  |
| C | -1.4098002 | -2.6519099 | -1.8822813 |
| C | -0.7687214 | -3.8893162 | -2.0277836 |
| C | -1.2045756 | -4.4314522 | 0.2919062  |
| H | -0.3450672 | -4.1735168 | -2.9930191 |
| H | -1.1172263 | -5.1393880 | 1.1178494  |
| H | -0.1631693 | -5.7359476 | -1.0807186 |
| H | 5.4782808  | 0.8938576  | -1.0772452 |
| C | 4.8056130  | 0.1311232  | -1.4798665 |
| C | 3.0911677  | -1.8156170 | -2.5129431 |
| C | 3.9221763  | -0.5281009 | -0.6170322 |
| C | 4.8336009  | -0.1715452 | -2.8453935 |
| C | 3.9760392  | -1.1533944 | -3.3622337 |
| C | 3.0493363  | -1.5118073 | -1.1381068 |
| H | 5.5271227  | 0.3550124  | -3.5064170 |
| H | 3.9988129  | -1.3981489 | -4.4273604 |
| H | 2.4230557  | -2.5858908 | -2.9062237 |
| C | 3.8457932  | -0.1777227 | 0.8505654  |
| H | 3.1643232  | 0.6905501  | 0.9598909  |
| H | 4.8192091  | 0.1888455  | 1.2128590  |
| C | 2.0715245  | -2.1513848 | -0.2343413 |
| H | 1.5815444  | -3.0448247 | -0.6436449 |
| C | 3.3296589  | -1.2874976 | 1.7342622  |
| C | 2.4428079  | -2.2471557 | 1.1896450  |
| C | 3.6656693  | -1.3575326 | 3.0909689  |
| H | 4.3548973  | -0.6194548 | 3.5120224  |
| C | 3.1278233  | -2.3548036 | 3.9120077  |
| H | 3.3988335  | -2.3941822 | 4.9704511  |
| C | 1.9036244  | -3.2456777 | 2.0251358  |
| H | 1.2086154  | -3.9724923 | 1.5982332  |
| C | 2.2435071  | -3.3023090 | 3.3755486  |
| H | 1.8207706  | -4.0825773 | 4.0140310  |
| C | 0.6923138  | 2.6847593  | -2.5313398 |
| H | -0.3847121 | 2.5384330  | -2.3604293 |
| C | 0.8506551  | 3.9152598  | -3.4389015 |
| H | 0.3115458  | 3.7637844  | -4.3886765 |
| H | 1.9088473  | 4.1052225  | -3.6843850 |
| H | 0.4467763  | 4.8189134  | -2.9544379 |
| C | 1.2281305  | 1.4068600  | -3.2019374 |
| H | 0.7300606  | 1.2378484  | -4.1707294 |
| H | 1.0487962  | 0.5234922  | -2.5715690 |
| H | 2.3134278  | 1.4689127  | -3.3823158 |
| C | 0.4555361  | 2.5515993  | 2.5793645  |

|    |            |            |            |                                                                                     |
|----|------------|------------|------------|-------------------------------------------------------------------------------------|
| H  | -0.6063092 | 2.4408627  | 2.3184644  |                                                                                     |
| C  | 0.5534047  | 3.6733751  | 3.6231110  |                                                                                     |
| H  | 0.1916201  | 4.6265908  | 3.2054640  |                                                                                     |
| H  | 1.5895307  | 3.8219308  | 3.9698538  |                                                                                     |
| H  | -0.0590372 | 3.4299270  | 4.5069383  |                                                                                     |
| C  | 0.9240983  | 1.1943702  | 3.1387363  |                                                                                     |
| H  | 1.9820172  | 1.2321859  | 3.4464990  |                                                                                     |
| H  | 0.8268792  | 0.3995188  | 2.3829522  |                                                                                     |
| H  | 0.3254262  | 0.9036978  | 4.0177239  |                                                                                     |
| C  | -1.5921123 | -1.6992917 | -3.0572062 |                                                                                     |
| H  | -1.5436308 | -0.6757534 | -2.6508112 |                                                                                     |
| C  | -2.9938900 | -1.8810294 | -3.6743214 |                                                                                     |
| H  | -3.7858657 | -1.8125032 | -2.9141181 |                                                                                     |
| H  | -3.0739338 | -2.8735312 | -4.1498927 |                                                                                     |
| H  | -3.1826369 | -1.1169621 | -4.4470593 |                                                                                     |
| C  | -0.5060986 | -1.8055115 | -4.1329061 |                                                                                     |
| H  | -0.5385631 | -2.7728270 | -4.6607672 |                                                                                     |
| H  | 0.4979971  | -1.6800347 | -3.7027381 |                                                                                     |
| H  | -0.6487714 | -1.0166917 | -4.8888500 |                                                                                     |
| C  | -2.4094107 | -2.7969637 | 1.8515980  |                                                                                     |
| H  | -3.3632389 | -2.2820513 | 1.6562425  |                                                                                     |
| C  | -2.7288065 | -3.9868625 | 2.7663685  |                                                                                     |
| H  | -3.2533885 | -3.6354466 | 3.6694203  |                                                                                     |
| H  | -1.8140754 | -4.5028548 | 3.1029198  |                                                                                     |
| H  | -3.3717689 | -4.7269965 | 2.2635762  |                                                                                     |
| C  | -1.4779878 | -1.8057778 | 2.5761186  |                                                                                     |
| H  | -1.9415331 | -1.4506468 | 3.5113813  |                                                                                     |
| H  | -1.2491281 | -0.9289364 | 1.9559796  |                                                                                     |
| H  | -0.5179396 | -2.2824931 | 2.8265151  |                                                                                     |
| H  | -4.6723683 | 4.0474041  | 0.6974681  | <b><i>Cu<sup>III</sup>(OH)(L)-DHA-IC</i></b>                                        |
| C  | -4.5037916 | 2.9818076  | 0.5345273  | <b><math>E_{B3LYP-D3/def2-SVP(Cu: def2-TZVP)/COSMO(\epsilon = 8.51)}</math>:</b>    |
| C  | -3.9803716 | 0.2848904  | 0.1196655  | <b>-3772.7083616292 (&lt;S<sup>2</sup>&gt; 1.03681583)</b>                          |
| C  | -5.5498094 | 2.0448019  | 0.5538607  | <b><math>E_{B3LYP-D3/def2-TZVPP/COSMO(\epsilon = 8.51)}</math>:</b>                 |
| C  | -3.2117318 | 2.5100331  | 0.2989386  | <b>-3775.0388727157 (S = 0; &lt;S<sup>2</sup>&gt; 1.03541793)</b>                   |
| N  | -3.0243584 | 1.2081759  | 0.1064914  | <b>-3775.0388596882 (S = 1; &lt;S<sup>2</sup>&gt; 2.03599411)</b>                   |
| C  | -5.3000477 | 0.6784949  | 0.3464467  | <b>-3775.0388866999 (spin purified)</b>                                             |
| H  | -6.5729445 | 2.3836702  | 0.7348453  | <b>ZPE<math>E_{B3LYP-D3/def2-SVP(Cu: def2-TZVP)/COSMO(\epsilon = 8.51)}</math>:</b> |
| H  | -6.0952281 | -0.0684806 | 0.3591341  | <b>0.852027</b>                                                                     |
| C  | -1.9226786 | 3.3208905  | 0.2531043  | <b>Chem. Pot.<sub>(298.15)</sub>/B3LYP-D3/def2-SVP(Cu: def2-</b>                    |
| O  | -1.9344673 | 4.5323307  | 0.4816730  | <b>TZVP)/COSMO(<math>\epsilon = 8.51</math>):</b>                                   |
| C  | -3.4666691 | -1.1270265 | -0.1306893 | <b>0.778106</b>                                                                     |
| O  | -4.2494364 | -2.0806569 | -0.1623821 |                                                                                     |
| N  | -2.1275140 | -1.1428436 | -0.3069058 |                                                                                     |
| N  | -0.8582290 | 2.5393705  | -0.0400871 |                                                                                     |
| Cu | -1.2162489 | 0.6084766  | -0.2015379 |                                                                                     |
| H  | 1.4278080  | 0.5328603  | -0.5709435 |                                                                                     |
| O  | 0.6674398  | -0.0415967 | -0.3744494 |                                                                                     |



|   |            |            |            |
|---|------------|------------|------------|
| H | 0.8830765  | -0.9371731 | -0.6832474 |
| C | 0.4569529  | 3.0608384  | -0.0399043 |
| C | 3.0961804  | 3.9874720  | -0.0468659 |
| C | 1.2326561  | 2.9661319  | 1.1418901  |
| C | 1.0062118  | 3.5883485  | -1.2372085 |
| C | 2.3299005  | 4.0490910  | -1.2148863 |
| C | 2.5517512  | 3.4435553  | 1.1172716  |
| H | 2.7757266  | 4.4661248  | -2.1200091 |
| H | 3.1609778  | 3.3922548  | 2.0235894  |
| H | 4.1256092  | 4.3562952  | -0.0497952 |
| C | -1.4237614 | -2.3370140 | -0.5898623 |
| C | 0.0828548  | -4.6191952 | -1.1747057 |
| C | -1.0563071 | -3.2152635 | 0.4624393  |
| C | -1.0148275 | -2.5817522 | -1.9270631 |
| C | -0.2552065 | -3.7303156 | -2.1961636 |
| C | -0.3152990 | -4.3601540 | 0.1391281  |
| H | 0.0674978  | -3.9416477 | -3.2177145 |
| H | -0.0315342 | -5.0602040 | 0.9255036  |
| H | 0.6672986  | -5.5153236 | -1.4010732 |
| H | 4.1942935  | 1.5044484  | -0.3112321 |
| C | 3.8654907  | 0.5983675  | -0.8244352 |
| C | 2.9835951  | -1.6991534 | -2.1534294 |
| C | 3.7548061  | -0.5942101 | -0.1046343 |
| C | 3.5440153  | 0.6566985  | -2.1888155 |
| C | 3.1140894  | -0.5034404 | -2.8536352 |
| C | 3.2871173  | -1.7718999 | -0.7654518 |
| H | 3.6246357  | 1.6054536  | -2.7234278 |
| H | 2.8654059  | -0.4631039 | -3.9169232 |
| H | 2.6169694  | -2.5960820 | -2.6591719 |
| C | 4.1565565  | -0.6658566 | 1.3479373  |
| H | 3.9540973  | 0.2927788  | 1.8499898  |
| H | 5.2604569  | -0.7805513 | 1.3839516  |
| C | 3.0551065  | -2.9625768 | -0.0116484 |
| H | 2.7052148  | -3.8548656 | -0.5340635 |
| C | 3.5522042  | -1.8149993 | 2.1196575  |
| C | 3.1066470  | -2.9735670 | 1.4153530  |
| C | 3.4806824  | -1.7913106 | 3.5140917  |
| H | 3.8027346  | -0.8936543 | 4.0500649  |
| C | 3.0080040  | -2.8970030 | 4.2331835  |
| H | 2.9540915  | -2.8557895 | 5.3241100  |
| C | 2.6585514  | -4.0960784 | 2.1609521  |
| H | 2.3284948  | -4.9876994 | 1.6226760  |
| C | 2.6096252  | -4.0578112 | 3.5495972  |
| H | 2.2489528  | -4.9258896 | 4.1076831  |
| C | 0.1667352  | 3.6079409  | -2.5109818 |
| H | -0.8744961 | 3.7921120  | -2.2034969 |
| C | 0.5544552  | 4.7199664  | -3.4940696 |
| H | -0.1707621 | 4.7605223  | -4.3227600 |

|   |            |            |            |
|---|------------|------------|------------|
| H | 1.5479374  | 4.5471170  | -3.9402482 |
| H | 0.5696571  | 5.7059328  | -3.0026412 |
| C | 0.2038157  | 2.2342354  | -3.2090742 |
| H | -0.4706985 | 2.2158571  | -4.0807104 |
| H | -0.1027530 | 1.4241711  | -2.5310206 |
| H | 1.2225607  | 2.0008802  | -3.5581085 |
| C | 0.6325011  | 2.4022485  | 2.4241096  |
| H | -0.3254397 | 1.9325750  | 2.1547516  |
| C | 0.3138333  | 3.5375709  | 3.4131533  |
| H | -0.3525109 | 4.2804553  | 2.9465599  |
| H | 1.2355282  | 4.0549920  | 3.7297327  |
| H | -0.1818664 | 3.1431914  | 4.3160837  |
| C | 1.4998267  | 1.3051493  | 3.0565702  |
| H | 2.4824084  | 1.6866457  | 3.3802814  |
| H | 1.6666122  | 0.4805150  | 2.3481559  |
| H | 1.0009052  | 0.8831555  | 3.9438920  |
| C | -1.4641355 | -1.6443318 | -3.0419587 |
| H | -1.5574567 | -0.6380795 | -2.6016077 |
| C | -2.8680392 | -2.0455764 | -3.5360314 |
| H | -3.5817969 | -2.1164651 | -2.7015014 |
| H | -2.8305973 | -3.0313403 | -4.0304561 |
| H | -3.2513321 | -1.3121152 | -4.2651786 |
| C | -0.4742238 | -1.5341002 | -4.2072837 |
| H | -0.4009114 | -2.4730755 | -4.7800315 |
| H | 0.5336570  | -1.2715944 | -3.8514689 |
| H | -0.8022425 | -0.7489546 | -4.9073536 |
| C | -1.4311861 | -2.8827303 | 1.9039575  |
| H | -2.4472175 | -2.4579277 | 1.8803392  |
| C | -1.4742459 | -4.1048337 | 2.8309381  |
| H | -1.8796553 | -3.8156014 | 3.8138831  |
| H | -0.4676886 | -4.5194376 | 3.0042083  |
| H | -2.1102321 | -4.9056428 | 2.4207217  |
| C | -0.4834481 | -1.8126785 | 2.4822828  |
| H | -0.7841531 | -1.5383396 | 3.5068133  |
| H | -0.4849416 | -0.8956191 | 1.8776503  |
| H | 0.5518896  | -2.1841424 | 2.5186830  |

## 6. References

- (a) *TURBOMOLE V6.6 2014, a development of University of Karlsruhe and Forschungszentrum Karlsruhe GmbH, 1989-2007, TURBOMOLE GmbH, since 2007; available from <http://www.turbomole.com>*; (b) F. Furche, R. Ahlrichs, C. Hättig, W. Klopper, M. Sierka and F. Weigend, *WIREs Comput. Mol. Sci.*, 2014, **4**, 91-100.
- Y. Zhao and D. Truhlar, *Theor. Chem. Acc.*, 2008, **120**, 215-241.
- Y. Zhao and D. G. Truhlar, *J. Phys. Chem. A*, 2008, **112**, 1095-1099.
- F. Weigend and R. Ahlrichs, *Phys. Chem. Chem. Phys.*, 2005, **7**, 3297-3305.
- M. Sierka, A. Hogekamp and R. Ahlrichs, *J. Chem. Phys.*, 2003, **118**, 9136-9148.
- F. Weigend, *Phys. Chem. Chem. Phys.*, 2006, **8**, 1057-1065.

7. I. M. Alecu, J. Zheng, Y. Zhao and D. G. Truhlar, *J. Chem. Theory Comput.*, 2010, **6**, 2872-2887.
8. B. B. Averkiev and D. G. Truhlar, *Catal. Sci. Technol.*, 2011, **1**, 1526-1529.
9. H.-J. Werner, P. J. Knowles, G. Knizia, F. R. Manby and M. Schütz, *WIREs Comput. Mol. Sci.*, 2012, **2**, 242-253.
10. (a) E. Papajak and D. G. Truhlar, *J. Chem. Phys.*, 2012, **137**, 064110; (b) J. Zheng, P. Seal and D. G. Truhlar, *Chem. Sci.*, 2013, **4**, 200-212.
11. (a) T. B. Adler, G. Knizia and H.-J. Werner, *J. Chem. Phys.*, 2007, **127**, 221106; (b) G. Knizia, T. B. Adler and H.-J. Werner, *J. Chem. Phys.*, 2009, **130**, 054104.
12. (a) G. Knizia and H.-J. Werner, *J. Chem. Phys.*, 2008, **128**, 154103; (b) H.-J. Werner, T. B. Adler and F. R. Manby, *J. Chem. Phys.*, 2007, **126**, 164102.
13. (a) E. Papajak, J. Zheng, X. Xu, H. R. Leverentz and D. G. Truhlar, *J. Chem. Theory Comput.*, 2011, **7**, 3027-3034; (b) E. Papajak and D. G. Truhlar, *J. Chem. Theory Comput.*, 2010, **6**, 597-601; (c) E. Papajak and D. G. Truhlar, *J. Chem. Theory Comput.*, 2011, **7**, 10-18.
14. F. Weigend, *Phys. Chem. Chem. Phys.*, 2002, **4**, 4285-4291.
15. F. Weigend, A. Köhn and C. Hättig, *J. Chem. Phys.*, 2002, **116**, 3175-3183.
16. (a) A. D. Becke, *J. Chem. Phys.*, 1993, **98**, 5648-5652; (b) C. Lee, W. Yang and R. G. Parr, *Phys. Rev. B*, 1988, **37**, 785-789.
17. S. Grimme, J. Antony, S. Ehrlich and H. Krieg, *J. Chem. Phys.*, 2010, **132**, 154104.
18. L. G. Gagliardi, C. B. Castells, C. Ràfols, M. Rosés and E. Bosch, *J. Chem. Eng. Data*, 2007, **52**, 1103-1107.
19. (a) T. M. Lowry and S. T. Henderson, *Proc. R. Soc. London Ser. A*, 1932, **136**, 471-487; (b) <http://www.sigmaaldrich.com/chemistry/solvents/acetonitrile-center.html>, Accessed June 7th 2016.
20. V. P. Pawar, *J. Chem. Eng. Data*, 2006, **51**, 882-885.
21. S. H. Canzonieri, M. A. Postigo, J. A. Salas and M. Katz, *J. Argent. Chem. Soc.*, 2002, **90**, 31-48.
22. A. Klamt and G. Schüürmann, *J. Chem. Soc., Perkin Trans. 2*, 1993, 799-805.
23. A. Klamt and V. Jonas, *J. Chem. Phys.*, 1996, **105**, 9972-9981.
24. (a) A. J. Johansson, M. R. A. Blomberg and P. E. M. Siegbahn, *J. Chem. Phys.*, 2008, **129**, 154301; (b) A. J. Johansson, M. R. A. Blomberg and P. E. M. Siegbahn, *J. Phys. Chem. C*, 2007, **111**, 12397-12406.
25. V. S. Bryantsev, M. S. Diallo and W. A. Goddard III, *J. Phys. Chem. B*, 2008, **112**, 9709-9719.
26. (a) T. Ziegler, A. Rauk and E. J. Baerends, *Theor. Chim. Acta*, 1977, **43**, 261-271; (b) L. Noodleman and J. G. Norman, *J. Chem. Phys.*, 1979, **70**, 4903-4906; (c) K. Yamaguchi, F. Jensen, A. Dorigo and K. N. Houk, *Chem. Phys. Lett.*, 1988, **149**, 537-542; (d) L. Noodleman and D. A. Case, in *Advances in Inorganic Chemistry*, ed. C. Richard, Academic Press, 1992, vol. Volume 38, pp. 423-470; (e) M. H. Lim, S. E. Worthington, F. J. Dulles and C. J. Cramer, in *Chemical Applications of Density-Functional Theory*, American Chemical Society, 1996, vol. 629, ch. 27, pp. 402-422; (f) H. Isobe, Y. Takano, Y. Kitagawa, T. Kawakami, S. Yamanaka, K. Yamaguchi and K. N. Houk, *Molecular Physics*, 2002, **100**, 717-727; (g) S. M. Huber, M. Z. Ertem, F. Aquilante, L. Gagliardi, W. B. Tolman and C. J. Cramer, *Chem. Eur. J.*, 2009, **15**, 4886-4895.
27. A. Hellweg, *J. Comput. Chem.*, 2013, **34**, 1835-1841.
28. J. England, Y. Guo, K. M. Van Heuvelen, M. A. Cranswick, G. T. Rohde, E. L.

- Bominaar, E. Münck and L. Que, Jr., *J. Am. Chem. Soc.*, 2011, **133**, 11880-11883.
29. J. England, Y. Guo, E. R. Farquhar, V. G. Young, Jr., E. Münck and L. Que, Jr., *J. Am. Chem. Soc.*, 2010, **132**, 8635-8644.
30. D. Dhar, G. M. Yee, A. D. Spaeth, D. W. Boyce, H. Zhang, B. Dereli, C. J. Cramer and W. B. Tolman, *J. Am. Chem. Soc.*, 2016, **138**, 356-368.
31. (a) G. Knizia and J. E. M. N. Klein, *Angew. Chem. Int. Ed.*, 2015, **54**, 5518-5522; (b) G. Knizia, <http://www.iboview.org/>.
32. P. J. Donoghue, J. Tehranchi, C. J. Cramer, R. Sarangi, E. I. Solomon and W. B. Tolman, *J. Am. Chem. Soc.*, 2011, **133**, 17602-17605.
33. J. Le Bras, H. Jiao, W. E. Meyer, F. Hampel and J. A. Gladysz, *J. Organomet. Chem.*, 2000, **616**, 54-66.
